# Supplementary material
Source: publisher figshare collection journal article supplement (https://acs.figshare.com/ndownloader/files/8734063)
Supplement: Supplementary file 1 [file 8734063]

 
data_l
 
_audit_creation_method            'SHELXL-2014/7'
_shelx_SHELXL_version_number      '2014/7'
_chemical_name_systematic         ?
_chemical_name_common             ?
_chemical_melting_point           ?
_chemical_formula_moiety          ?
_chemical_formula_sum
 'C21 H15 Br N2' 
_chemical_formula_weight          375.26

loop_
 _atom_type_symbol
 _atom_type_description
 _atom_type_scat_dispersion_real
 _atom_type_scat_dispersion_imag
 _atom_type_scat_source
 'C'  'C'   0.0033   0.0016
 'International Tables Vol C Tables 4.2.6.8 and 6.1.1.4'
 'H'  'H'   0.0000   0.0000
 'International Tables Vol C Tables 4.2.6.8 and 6.1.1.4'
 'N'  'N'   0.0061   0.0033
 'International Tables Vol C Tables 4.2.6.8 and 6.1.1.4'
 'Br'  'Br'  -0.2901   2.4595
 'International Tables Vol C Tables 4.2.6.8 and 6.1.1.4'
 
_space_group_crystal_system       monoclinic
_space_group_IT_number            14
_space_group_name_H-M_alt         'P 21/c'
_space_group_name_Hall            '-P 2ybc'
 
_shelx_space_group_comment
;
The symmetry employed for this shelxl refinement is uniquely defined
by the following loop, which should always be used as a source of
symmetry information in preference to the above space-group names.
They are only intended as comments.
;
 
loop_
 _space_group_symop_operation_xyz
 'x, y, z'
 '-x, y+1/2, -z+1/2'
 '-x, -y, -z'
 'x, -y-1/2, z-1/2'
 
_cell_length_a                    19.0662(10)
_cell_length_b                    5.9230(2)
_cell_length_c                    15.8955(7)
_cell_angle_alpha                 90
_cell_angle_beta                  110.623(6)
_cell_angle_gamma                 90
_cell_volume                      1680.03(14)
_cell_formula_units_Z             4
_cell_measurement_temperature     293(2)
_cell_measurement_reflns_used   4072
_cell_measurement_theta_min     4.1140
_cell_measurement_theta_max     25.6800
 
_exptl_crystal_description       bolck
_exptl_crystal_colour            yellow
_exptl_crystal_density_meas       ?
_exptl_crystal_density_method     ?
_exptl_crystal_density_diffrn     1.484          
_exptl_crystal_F_000              760
_exptl_transmission_factor_min    ?
_exptl_transmission_factor_max    ?
_exptl_crystal_size_max           0.100
_exptl_crystal_size_mid           0.080
_exptl_crystal_size_min           0.060
_exptl_absorpt_coefficient_mu     2.450
_shelx_estimated_absorpt_T_min    0.792
_shelx_estimated_absorpt_T_max    0.867
_exptl_absorpt_correction_T_min                   0.62540
_exptl_absorpt_correction_T_max                   1.00000
_exptl_absorpt_correction_type            multi-scan
_exptl_absorpt_process_details
;
CrysAlisPro 1.171.38.41 (Rigaku Oxford Diffraction, 2015)
Empirical absorption correction using spherical harmonics,
 implemented in SCALE3 ABSPACK scaling algorithm.
;
_exptl_absorpt_special_details    ?
_diffrn_ambient_temperature       293(2)
_diffrn_source 'micro-focus sealed X-ray tube'
_diffrn_source_type 'SuperNova (Mo) X-ray Source'
_diffrn_radiation_probe x-ray
_diffrn_radiation_type 'Mo K\a'
_diffrn_radiation_wavelength 0.71073
_diffrn_radiation_monochromator mirror
_diffrn_measurement_device 'four-circle diffractometer'
_diffrn_measurement_device_type 'SuperNova, Single source at offset, EosS2'
_diffrn_detector 'CCD plate'
_diffrn_detector_type EosS2
_diffrn_detector_area_resol_mean  ?
_diffrn_measurement_method '\w scans'
_diffrn_reflns_number             13392
_diffrn_reflns_av_unetI/netI      0.0350
_diffrn_reflns_av_R_equivalents   0.0267
_diffrn_reflns_limit_h_min        -24
_diffrn_reflns_limit_h_max        26
_diffrn_reflns_limit_k_min        -7
_diffrn_reflns_limit_k_max        7
_diffrn_reflns_limit_l_min        -21
_diffrn_reflns_limit_l_max        13
_diffrn_reflns_theta_min          3.318
_diffrn_reflns_theta_max          29.331
_diffrn_reflns_theta_full         25.242
_diffrn_measured_fraction_theta_max   0.878
_diffrn_measured_fraction_theta_full  0.998
_diffrn_reflns_Laue_measured_fraction_max    0.878
_diffrn_reflns_Laue_measured_fraction_full   0.998
_diffrn_reflns_point_group_measured_fraction_max   0.878
_diffrn_reflns_point_group_measured_fraction_full  0.998
_reflns_number_total              4044
_reflns_number_gt                 2818
_reflns_threshold_expression      'I > 2\s(I)'
_reflns_Friedel_coverage          0.000
_reflns_Friedel_fraction_max      .
_reflns_Friedel_fraction_full     .
 
_reflns_special_details
;
 Reflections were merged by SHELXL according to the crystal
 class for the calculation of statistics and refinement.
 
 _reflns_Friedel_fraction is defined as the number of unique
 Friedel pairs measured divided by the number that would be
 possible theoretically, ignoring centric projections and
 systematic absences.
;
 
_computing_data_collection     'CrysAlisPro 1.171.38.41 (Rigaku OD, 2015)'
_computing_cell_refinement     'CrysAlisPro 1.171.38.41 (Rigaku OD, 2015)'
_computing_data_reduction      'CrysAlisPro 1.171.38.41 (Rigaku OD, 2015)'
_computing_structure_solution   'SHELXS-2014/7 (Sheldrick, 2014)'
_computing_structure_refinement 'SHELXL-2014/7 (Sheldrick, 2014)'
_computing_molecular_graphics     ?
_computing_publication_material   ?
_refine_special_details           ?
_refine_ls_structure_factor_coef  Fsqd
_refine_ls_matrix_type            full
_refine_ls_weighting_scheme       calc
_refine_ls_weighting_details
'w=1/[\s^2^(Fo^2^)+(0.0486P)^2^+0.5854P] where P=(Fo^2^+2Fc^2^)/3'
_atom_sites_solution_primary      ?
_atom_sites_solution_secondary    ?
_atom_sites_solution_hydrogens    geom
_refine_ls_hydrogen_treatment     constr
_refine_ls_extinction_method      none
_refine_ls_extinction_coef        .
_refine_ls_number_reflns          4044
_refine_ls_number_parameters      217
_refine_ls_number_restraints      0
_refine_ls_R_factor_all           0.0724
_refine_ls_R_factor_gt            0.0411
_refine_ls_wR_factor_ref          0.1086
_refine_ls_wR_factor_gt           0.0954
_refine_ls_goodness_of_fit_ref    1.040
_refine_ls_restrained_S_all       1.040
_refine_ls_shift/su_max           0.003
_refine_ls_shift/su_mean          0.000
 
loop_
 _atom_site_label
 _atom_site_type_symbol
 _atom_site_fract_x
 _atom_site_fract_y
 _atom_site_fract_z
 _atom_site_U_iso_or_equiv
 _atom_site_adp_type
 _atom_site_occupancy
 _atom_site_site_symmetry_order  
 _atom_site_calc_flag
 _atom_site_refinement_flags_posn
 _atom_site_refinement_flags_adp
 _atom_site_refinement_flags_occupancy
 _atom_site_disorder_assembly
 _atom_site_disorder_group
Br1 Br 0.48415(2) -0.22309(5) 1.17606(2) 0.06046(14) Uani 1 1 d . . . . .
C10 C 0.24621(14) 0.7700(4) 0.66941(18) 0.0379(6) Uani 1 1 d . . . . .
C1 C 0.42845(14) -0.0462(4) 1.07478(16) 0.0403(6) Uani 1 1 d . . . . .
C7 C 0.29944(13) 0.3499(4) 0.85106(16) 0.0376(6) Uani 1 1 d . . . . .
N2 N 0.22524(12) 0.3177(4) 0.81703(14) 0.0410(5) Uani 1 1 d . . . . .
N1 N 0.20034(11) 0.4715(3) 0.74916(14) 0.0393(5) Uani 1 1 d . . . . .
C4 C 0.34524(14) 0.2096(4) 0.92720(16) 0.0356(5) Uani 1 1 d . . . . .
C6 C 0.36043(14) -0.1272(4) 1.01751(17) 0.0428(6) Uani 1 1 d . . . . .
H6A H 0.3423 -0.2656 1.0286 0.051 Uiso 1 1 calc R U . . .
C16 C 0.12070(13) 0.4953(4) 0.70365(16) 0.0400(6) Uani 1 1 d . . . . .
C9 C 0.25692(13) 0.5985(4) 0.73984(16) 0.0365(6) Uani 1 1 d . . . . .
C2 C 0.45562(15) 0.1590(5) 1.05923(18) 0.0458(6) Uani 1 1 d . . . . .
H2B H 0.5017 0.2115 1.0979 0.055 Uiso 1 1 calc R U . . .
C5 C 0.31957(14) -0.0001(4) 0.94344(17) 0.0413(6) Uani 1 1 d . . . . .
H5A H 0.2743 -0.0556 0.9039 0.050 Uiso 1 1 calc R U . . .
C17 C 0.08154(16) 0.3237(5) 0.6490(2) 0.0539(7) Uani 1 1 d . . . . .
H17A H 0.1060 0.1933 0.6419 0.065 Uiso 1 1 calc R U . . .
C3 C 0.41431(14) 0.2850(4) 0.98642(19) 0.0432(6) Uani 1 1 d . . . . .
H3A H 0.4327 0.4238 0.9762 0.052 Uiso 1 1 calc R U . . .
C15 C 0.19392(15) 0.7444(4) 0.58268(19) 0.0464(7) Uani 1 1 d . . . . .
H15A H 0.1643 0.6153 0.5682 0.056 Uiso 1 1 calc R U . . .
C8 C 0.32129(14) 0.5220(4) 0.80530(16) 0.0397(6) Uani 1 1 d . . . . .
H8A H 0.3698 0.5744 0.8168 0.048 Uiso 1 1 calc R U . . .
C11 C 0.29187(15) 0.9617(4) 0.68775(18) 0.0442(6) Uani 1 1 d . . . . .
H11A H 0.3285 0.9798 0.7443 0.053 Uiso 1 1 calc R U . . .
C21 C 0.08562(17) 0.6893(5) 0.7156(2) 0.0533(7) Uani 1 1 d . . . . .
H21A H 0.1129 0.8040 0.7528 0.064 Uiso 1 1 calc R U . . .
C12 C 0.28300(17) 1.1241(5) 0.6226(2) 0.0526(7) Uani 1 1 d . . . . .
H12A H 0.3134 1.2516 0.6358 0.063 Uiso 1 1 calc R U . . .
C14 C 0.18569(15) 0.9085(5) 0.51819(19) 0.0544(8) Uani 1 1 d . . . . .
H14A H 0.1503 0.8899 0.4609 0.065 Uiso 1 1 calc R U . . .
C20 C 0.00865(19) 0.7112(6) 0.6709(2) 0.0662(9) Uani 1 1 d . . . . .
H20A H -0.0159 0.8413 0.6783 0.079 Uiso 1 1 calc R U . . .
C13 C 0.22957(16) 1.0994(5) 0.5381(2) 0.0524(7) Uani 1 1 d . . . . .
H13A H 0.2232 1.2110 0.4949 0.063 Uiso 1 1 calc R U . . .
C19 C -0.03100(17) 0.5412(7) 0.6161(2) 0.0706(10) Uani 1 1 d . . . . .
H19A H -0.0824 0.5563 0.5863 0.085 Uiso 1 1 calc R U . . .
C18 C 0.00516(17) 0.3475(7) 0.6048(2) 0.0675(9) Uani 1 1 d . . . . .
H18A H -0.0219 0.2328 0.5674 0.081 Uiso 1 1 calc R U . . .
 
loop_
 _atom_site_aniso_label
 _atom_site_aniso_U_11
 _atom_site_aniso_U_22
 _atom_site_aniso_U_33
 _atom_site_aniso_U_23
 _atom_site_aniso_U_13
 _atom_site_aniso_U_12
Br1 0.0681(2) 0.0604(2) 0.04440(19) 0.00988(13) 0.00925(15) 0.01271(15)
C10 0.0369(13) 0.0398(14) 0.0397(13) -0.0006(11) 0.0169(11) -0.0023(10)
C1 0.0417(14) 0.0426(14) 0.0343(13) 0.0019(11) 0.0107(11) 0.0098(11)
C7 0.0380(13) 0.0369(13) 0.0368(13) -0.0043(11) 0.0120(11) 0.0015(11)
N2 0.0404(12) 0.0450(12) 0.0377(11) 0.0072(10) 0.0139(10) 0.0020(9)
N1 0.0341(11) 0.0433(12) 0.0401(12) 0.0072(9) 0.0125(9) 0.0013(9)
C4 0.0374(13) 0.0366(13) 0.0332(12) -0.0028(10) 0.0131(11) 0.0036(10)
C6 0.0458(15) 0.0374(14) 0.0461(15) 0.0010(12) 0.0172(12) 0.0014(12)
C16 0.0343(13) 0.0491(15) 0.0380(14) 0.0081(11) 0.0143(11) -0.0004(11)
C9 0.0380(13) 0.0359(13) 0.0357(13) -0.0037(10) 0.0132(11) -0.0030(10)
C2 0.0397(14) 0.0484(16) 0.0433(15) -0.0035(13) 0.0071(12) -0.0040(12)
C5 0.0376(13) 0.0391(14) 0.0443(15) -0.0013(11) 0.0110(12) 0.0013(11)
C17 0.0465(16) 0.0541(17) 0.0598(18) -0.0011(15) 0.0172(14) -0.0057(13)
C3 0.0399(14) 0.0388(14) 0.0485(16) 0.0003(12) 0.0127(12) -0.0031(11)
C15 0.0407(14) 0.0519(17) 0.0451(15) 0.0050(12) 0.0133(13) -0.0107(12)
C8 0.0380(13) 0.0389(14) 0.0404(14) -0.0042(11) 0.0114(11) -0.0045(11)
C11 0.0489(15) 0.0424(15) 0.0458(15) -0.0093(12) 0.0222(13) -0.0077(12)
C21 0.0528(17) 0.0554(17) 0.0520(17) 0.0034(14) 0.0190(14) 0.0069(14)
C12 0.0650(19) 0.0384(15) 0.067(2) -0.0038(14) 0.0390(17) -0.0067(13)
C14 0.0423(15) 0.073(2) 0.0473(16) 0.0152(15) 0.0157(13) -0.0008(14)
C20 0.0528(18) 0.073(2) 0.072(2) 0.0137(18) 0.0208(17) 0.0194(17)
C13 0.0563(17) 0.0485(17) 0.0628(19) 0.0189(14) 0.0340(16) 0.0093(14)
C19 0.0393(16) 0.099(3) 0.067(2) 0.020(2) 0.0106(16) 0.0050(18)
C18 0.0456(17) 0.081(2) 0.067(2) 0.0011(19) 0.0086(16) -0.0160(17)
 
_geom_special_details
;
 All esds (except the esd in the dihedral angle between two l.s. planes)
 are estimated using the full covariance matrix.  The cell esds are taken
 into account individually in the estimation of esds in distances, angles
 and torsion angles; correlations between esds in cell parameters are only
 used when they are defined by crystal symmetry.  An approximate (isotropic)
 treatment of cell esds is used for estimating esds involving l.s. planes.
;
 
loop_
 _geom_bond_atom_site_label_1
 _geom_bond_atom_site_label_2
 _geom_bond_distance
 _geom_bond_site_symmetry_2
 _geom_bond_publ_flag
Br1 C1 1.901(2) . ?
C10 C15 1.396(4) . ?
C10 C11 1.397(3) . ?
C10 C9 1.472(4) . ?
C1 C2 1.377(4) . ?
C1 C6 1.382(3) . ?
C7 N2 1.338(3) . ?
C7 C8 1.398(4) . ?
C7 C4 1.474(3) . ?
N2 N1 1.363(3) . ?
N1 C9 1.366(3) . ?
N1 C16 1.440(3) . ?
C4 C5 1.392(3) . ?
C4 C3 1.395(4) . ?
C6 C5 1.383(3) . ?
C6 H6A 0.9300 . ?
C16 C17 1.374(4) . ?
C16 C21 1.376(4) . ?
C9 C8 1.377(3) . ?
C2 C3 1.369(4) . ?
C2 H2B 0.9300 . ?
C5 H5A 0.9300 . ?
C17 C18 1.383(4) . ?
C17 H17A 0.9300 . ?
C3 H3A 0.9300 . ?
C15 C14 1.381(4) . ?
C15 H15A 0.9300 . ?
C8 H8A 0.9300 . ?
C11 C12 1.380(4) . ?
C11 H11A 0.9300 . ?
C21 C20 1.393(4) . ?
C21 H21A 0.9300 . ?
C12 C13 1.378(4) . ?
C12 H12A 0.9300 . ?
C14 C13 1.375(4) . ?
C14 H14A 0.9300 . ?
C20 C19 1.372(5) . ?
C20 H20A 0.9300 . ?
C13 H13A 0.9300 . ?
C19 C18 1.382(5) . ?
C19 H19A 0.9300 . ?
C18 H18A 0.9300 . ?
 
loop_
 _geom_angle_atom_site_label_1
 _geom_angle_atom_site_label_2
 _geom_angle_atom_site_label_3
 _geom_angle
 _geom_angle_site_symmetry_1
 _geom_angle_site_symmetry_3
 _geom_angle_publ_flag
C15 C10 C11 118.0(2) . . ?
C15 C10 C9 122.4(2) . . ?
C11 C10 C9 119.5(2) . . ?
C2 C1 C6 120.9(2) . . ?
C2 C1 Br1 120.34(19) . . ?
C6 C1 Br1 118.8(2) . . ?
N2 C7 C8 111.1(2) . . ?
N2 C7 C4 119.2(2) . . ?
C8 C7 C4 129.7(2) . . ?
C7 N2 N1 104.4(2) . . ?
N2 N1 C9 112.70(19) . . ?
N2 N1 C16 118.34(19) . . ?
C9 N1 C16 128.7(2) . . ?
C5 C4 C3 118.1(2) . . ?
C5 C4 C7 120.7(2) . . ?
C3 C4 C7 121.2(2) . . ?
C1 C6 C5 119.2(2) . . ?
C1 C6 H6A 120.4 . . ?
C5 C6 H6A 120.4 . . ?
C17 C16 C21 121.5(3) . . ?
C17 C16 N1 119.1(2) . . ?
C21 C16 N1 119.3(2) . . ?
N1 C9 C8 105.3(2) . . ?
N1 C9 C10 124.0(2) . . ?
C8 C9 C10 130.6(2) . . ?
C3 C2 C1 119.5(2) . . ?
C3 C2 H2B 120.3 . . ?
C1 C2 H2B 120.3 . . ?
C6 C5 C4 120.9(2) . . ?
C6 C5 H5A 119.5 . . ?
C4 C5 H5A 119.5 . . ?
C16 C17 C18 119.1(3) . . ?
C16 C17 H17A 120.5 . . ?
C18 C17 H17A 120.5 . . ?
C2 C3 C4 121.4(2) . . ?
C2 C3 H3A 119.3 . . ?
C4 C3 H3A 119.3 . . ?
C14 C15 C10 120.8(2) . . ?
C14 C15 H15A 119.6 . . ?
C10 C15 H15A 119.6 . . ?
C9 C8 C7 106.5(2) . . ?
C9 C8 H8A 126.8 . . ?
C7 C8 H8A 126.8 . . ?
C12 C11 C10 120.5(3) . . ?
C12 C11 H11A 119.8 . . ?
C10 C11 H11A 119.8 . . ?
C16 C21 C20 118.9(3) . . ?
C16 C21 H21A 120.5 . . ?
C20 C21 H21A 120.5 . . ?
C13 C12 C11 120.7(3) . . ?
C13 C12 H12A 119.7 . . ?
C11 C12 H12A 119.7 . . ?
C13 C14 C15 120.4(3) . . ?
C13 C14 H14A 119.8 . . ?
C15 C14 H14A 119.8 . . ?
C19 C20 C21 120.1(3) . . ?
C19 C20 H20A 120.0 . . ?
C21 C20 H20A 120.0 . . ?
C14 C13 C12 119.5(3) . . ?
C14 C13 H13A 120.2 . . ?
C12 C13 H13A 120.2 . . ?
C20 C19 C18 120.2(3) . . ?
C20 C19 H19A 119.9 . . ?
C18 C19 H19A 119.9 . . ?
C19 C18 C17 120.2(3) . . ?
C19 C18 H18A 119.9 . . ?
C17 C18 H18A 119.9 . . ?
 
_refine_diff_density_max    0.245
_refine_diff_density_min   -0.408
_refine_diff_density_rms    0.053

_shelx_res_file
;

    l.res created by SHELXL-2014/7


TITL L in P2(1)/c
CELL 0.71073  19.0662   5.9230  15.8955  90.000 110.623  90.000
ZERR   4.00   0.0010   0.0002   0.0007   0.000   0.006   0.000
LATT  1
SYMM -X, 0.5+Y, 0.5-Z
SFAC C H N BR
UNIT 84 60 8 4

L.S. 10
BOND $H
FMAP 2
PLAN 10
ACTA
SIZE 0.10 0.08 0.06

WGHT    0.048600    0.585400
FVAR       0.12569
BR1   4    0.484154   -0.223087    1.176057    11.00000    0.06813    0.06036 =
         0.04440    0.00988    0.00925    0.01271
C10   1    0.246211    0.770012    0.669407    11.00000    0.03692    0.03984 =
         0.03965   -0.00060    0.01688   -0.00232
C1    1    0.428448   -0.046187    1.074782    11.00000    0.04170    0.04264 =
         0.03432    0.00191    0.01066    0.00980
C7    1    0.299435    0.349853    0.851056    11.00000    0.03797    0.03692 =
         0.03683   -0.00430    0.01197    0.00147
N2    3    0.225237    0.317679    0.817028    11.00000    0.04043    0.04496 =
         0.03773    0.00721    0.01387    0.00200
N1    3    0.200335    0.471450    0.749163    11.00000    0.03414    0.04334 =
         0.04009    0.00719    0.01251    0.00133
C4    1    0.345236    0.209564    0.927198    11.00000    0.03737    0.03664 =
         0.03318   -0.00282    0.01307    0.00359
C6    1    0.360434   -0.127213    1.017510    11.00000    0.04579    0.03742 =
         0.04613    0.00101    0.01717    0.00142
AFIX  43
H6A   2    0.342336   -0.265577    1.028629    11.00000   -1.20000
AFIX   0
C16   1    0.120698    0.495274    0.703646    11.00000    0.03430    0.04911 =
         0.03797    0.00813    0.01433   -0.00036
C9    1    0.256924    0.598519    0.739836    11.00000    0.03800    0.03586 =
         0.03575   -0.00371    0.01323   -0.00297
C2    1    0.455616    0.158996    1.059229    11.00000    0.03967    0.04845 =
         0.04332   -0.00354    0.00706   -0.00401
AFIX  43
H2B   2    0.501657    0.211540    1.097872    11.00000   -1.20000
AFIX   0
C5    1    0.319573   -0.000123    0.943438    11.00000    0.03761    0.03909 =
         0.04433   -0.00129    0.01104    0.00127
AFIX  43
H5A   2    0.274320   -0.055564    0.903935    11.00000   -1.20000
AFIX   0
C17   1    0.081537    0.323694    0.649014    11.00000    0.04645    0.05413 =
         0.05981   -0.00112    0.01719   -0.00574
AFIX  43
H17A  2    0.106045    0.193338    0.641855    11.00000   -1.20000
AFIX   0
C3    1    0.414307    0.285026    0.986422    11.00000    0.03988    0.03885 =
         0.04851    0.00028    0.01272   -0.00307
AFIX  43
H3A   2    0.432673    0.423847    0.976229    11.00000   -1.20000
AFIX   0
C15   1    0.193919    0.744401    0.582680    11.00000    0.04067    0.05192 =
         0.04513    0.00504    0.01331   -0.01071
AFIX  43
H15A  2    0.164289    0.615341    0.568173    11.00000   -1.20000
AFIX   0
C8    1    0.321294    0.521967    0.805298    11.00000    0.03802    0.03888 =
         0.04038   -0.00418    0.01140   -0.00445
AFIX  43
H8A   2    0.369769    0.574386    0.816821    11.00000   -1.20000
AFIX   0
C11   1    0.291870    0.961662    0.687747    11.00000    0.04891    0.04242 =
         0.04582   -0.00935    0.02222   -0.00770
AFIX  43
H11A  2    0.328505    0.979849    0.744282    11.00000   -1.20000
AFIX   0
C21   1    0.085624    0.689348    0.715578    11.00000    0.05279    0.05537 =
         0.05204    0.00338    0.01899    0.00689
AFIX  43
H21A  2    0.112857    0.803996    0.752841    11.00000   -1.20000
AFIX   0
C12   1    0.282997    1.124108    0.622591    11.00000    0.06503    0.03838 =
         0.06701   -0.00381    0.03898   -0.00673
AFIX  43
H12A  2    0.313405    1.251622    0.635822    11.00000   -1.20000
AFIX   0
C14   1    0.185693    0.908523    0.518193    11.00000    0.04230    0.07344 =
         0.04733    0.01522    0.01568   -0.00080
AFIX  43
H14A  2    0.150250    0.889860    0.460892    11.00000   -1.20000
AFIX   0
C20   1    0.008646    0.711230    0.670914    11.00000    0.05281    0.07300 =
         0.07185    0.01365    0.02077    0.01938
AFIX  43
H20A  2   -0.015895    0.841291    0.678305    11.00000   -1.20000
AFIX   0
C13   1    0.229571    1.099409    0.538148    11.00000    0.05629    0.04851 =
         0.06282    0.01890    0.03397    0.00935
AFIX  43
H13A  2    0.223213    1.211018    0.494934    11.00000   -1.20000
AFIX   0
C19   1   -0.031002    0.541214    0.616051    11.00000    0.03932    0.09892 =
         0.06692    0.02000    0.01058    0.00501
AFIX  43
H19A  2   -0.082382    0.556338    0.586321    11.00000   -1.20000
AFIX   0
C18   1    0.005158    0.347477    0.604805    11.00000    0.04558    0.08052 =
         0.06729    0.00113    0.00861   -0.01599
AFIX  43
H18A  2   -0.021936    0.232826    0.567419    11.00000   -1.20000

AFIX   0
HKLF 4

REM  L in P2(1)/c
REM R1 =  0.0411 for    2818 Fo > 4sig(Fo)  and  0.0724 for all    4044 data
REM    217 parameters refined using      0 restraints

END

WGHT      0.0393      0.6895

REM Highest difference peak  0.245,  deepest hole -0.408,  1-sigma level  0.053
Q1    1   0.4427 -0.1303  1.1704  11.00000  0.05    0.25
Q2    1   0.1573  0.4704  0.7219  11.00000  0.05    0.24
Q3    1   0.3952 -0.0673  1.0502  11.00000  0.05    0.24
Q4    1   0.2883  0.5138  0.7478  11.00000  0.05    0.23
Q5    1   0.5168 -0.1093  1.1902  11.00000  0.05    0.22
Q6    1   0.2798  0.8011  0.6701  11.00000  0.05    0.22
Q7    1   0.2728  1.0580  0.5745  11.00000  0.05    0.19
Q8    1   0.3549 -0.0567  0.9659  11.00000  0.05    0.19
Q9    1   0.1903  0.2585  0.8332  11.00000  0.05    0.19
Q10   1   0.5103  0.0057  1.0323  11.00000  0.05    0.19
;
_shelx_res_checksum   21483

_shelx_hkl_file
;
   3   0   0   30.99    0.46
   3   0   0   30.43    0.51
  -3   0   0   30.18    0.46
  -3   0   0   31.27    0.50
  -4   0   0  508.43    2.16
  -4   0   0  507.81    2.33
   4   0   0  503.06    2.40
   4   0   0  512.58    2.15
   5   0   0   86.19    0.99
   5   0   0   89.85    1.13
  -5   0   0   87.95    1.09
   6   0   0  106.48    1.36
   6   0   0  107.15    1.21
  -6   0   0  104.66    1.30
   6   0   0   98.61    1.37
   7   0   0   59.83    0.97
  -7   0   0   60.48    1.07
   7   0   0   61.47    1.13
   7   0   0   62.37    1.14
   8   0   0   14.34    0.52
   8   0   0   15.11    0.59
   8   0   0   14.41    0.59
  -8   0   0   13.91    0.57
   9   0   0    7.46    0.46
   9   0   0    7.78    0.41
   9   0   0    7.58    0.46
  -9   0   0    7.98    0.45
 -10   0   0   73.30    1.41
  10   0   0   74.98    1.31
  11   0   0    2.58    0.29
 -11   0   0    2.96    0.34
  12   0   0   15.84    0.68
 -12   0   0   15.49    0.74
 -13   0   0    6.56    0.53
  13   0   0    6.29    0.47
  14   0   0    6.73    0.51
  15   0   0    3.86    0.41
 -15   0   0    3.72    0.47
  16   0   0    3.20    0.40
 -16   0   0    3.27    0.45
  17   0   0    2.85    0.39
 -17   0   0    2.86    0.46
  18   0   0    6.33    0.58
 -18   0   0    6.17    0.61
  19   0   0    0.83    0.26
 -19   0   0    1.66    0.38
 -20   0   0    0.84    0.35
  20   0   0    1.10    0.31
 -21   0   0    1.51    0.43
  21   0   0    1.55    0.37
 -22   0   0    1.13    0.39
  22   0   0    0.70    0.31
  23   0   0    1.39    0.40
   0  -1   0    0.03    0.03
   0   1   0   -0.01    0.04
  -1   1   0    0.17    0.05
  -1  -1   0    0.10    0.04
  -1  -1   0    0.10    0.04
  -1  -1   0    0.17    0.04
   1  -1   0    0.11    0.05
   1   1   0    0.18    0.04
   1   1   0    0.16    0.05
   1   1   0    0.16    0.05
   1  -1   0    0.11    0.03
  -2  -1   0    6.19    0.21
   2   1   0    6.19    0.25
  -2  -1   0    6.02    0.15
   2  -1   0    6.33    0.20
   2   1   0    6.02    0.21
  -2   1   0    6.14    0.20
  -2  -1   0    6.26    0.24
  -2  -1   0    6.11    0.21
   2  -1   0    6.36    0.24
   2   1   0    5.90    0.22
  -3  -1   0    5.73    0.23
   3   1   0    5.49    0.26
  -3  -1   0    5.89    0.27
   3  -1   0    5.83    0.22
   3   1   0    5.72    0.21
   3   1   0    5.46    0.24
  -3  -1   0    5.82    0.15
   3   1   0    5.60    0.16
  -3   1   0    5.54    0.22
  -4  -1   0   37.72    0.67
   4   1   0   39.97    0.56
   4   1   0   38.43    0.70
   4   1   0   41.02    0.46
  -4  -1   0   40.38    0.47
  -4   1   0   39.09    0.65
   4   1   0   38.50    0.76
  -4  -1   0   39.52    0.75
   5   1   0    5.55    0.20
  -5  -1   0    5.75    0.28
   5   1   0    5.79    0.30
   5   1   0    5.63    0.32
  -5   1   0    5.77    0.28
  -5  -1   0    5.71    0.21
   5  -1   0    5.85    0.28
  -5  -1   0    5.35    0.30
  -6   1   0   16.65    0.51
   6   1   0   17.30    0.56
  -6  -1   0   16.52    0.57
  -6  -1   0   16.66    0.40
   6  -1   0   16.00    0.56
   6   1   0   16.24    0.38
  -6  -1   0   17.12    0.54
   6   1   0   15.89    0.58
   6  -1   0   16.77    0.52
  -7  -1   0   32.59    0.86
  -7  -1   0   33.01    0.64
   7   1   0   31.85    0.84
   7  -1   0   33.07    0.80
   7   1   0   32.86    0.60
  -7   1   0   32.99    0.77
   7   1   0   32.37    0.88
   7  -1   0   33.63    0.85
   8  -1   0   27.69    0.79
  -8  -1   0   26.50    0.64
  -8   1   0   28.28    0.77
   8  -1   0   28.77    0.84
  -8  -1   0   28.60    0.85
   8   1   0   28.49    0.84
   8   1   0   28.28    0.87
   8   1   0   29.80    0.63
   9   1   0   66.86    1.02
  -9  -1   0   67.13    1.35
   9  -1   0   66.25    1.30
   9   1   0   64.75    1.34
   9  -1   0   65.48    1.33
  -9   1   0   64.70    1.22
  -9  -1   0   64.77    1.05
 -10  -1   0   85.62    1.61
  10  -1   0   85.01    1.57
  10   1   0   82.39    1.22
 -10   1   0   83.76    1.48
 -11   1   0   22.89    0.82
  11  -1   0   24.65    0.88
 -11  -1   0   26.23    0.94
  11   1   0   24.54    0.70
 -12  -1   0    9.03    0.59
  12   1   0    8.46    0.45
 -12   1   0    8.17    0.52
  12  -1   0    8.20    0.55
  13  -1   0   40.14    1.22
  13   1   0   41.39    1.03
 -13   1   0   41.27    1.19
 -13  -1   0   44.14    1.31
  14  -1   0   25.31    1.00
 -14   1   0   24.60    0.98
 -14  -1   0   25.83    1.06
  14   1   0   25.01    0.84
 -15   1   0    2.38    0.37
  15  -1   0    2.41    0.37
 -15  -1   0    2.86    0.42
  15   1   0    2.51    0.31
  16   1   0    6.98    0.51
 -16  -1   0    6.41    0.60
  16  -1   0    6.58    0.57
 -16   1   0    6.98    0.59
 -17  -1   0   27.12    1.20
 -17   1   0   23.88    1.09
  17   1   0   25.35    0.96
  17  -1   0   24.15    1.10
  18  -1   0   10.01    0.72
  18   1   0   10.81    0.67
 -18   1   0    9.49    0.73
  19  -1   0    1.35    0.35
 -19  -1   0    1.71    0.39
  19   1   0    1.70    0.33
 -19   1   0    1.58    0.38
  20  -1   0    2.06    0.37
 -20  -1   0    2.79    0.48
 -20   1   0    2.34    0.44
  20   1   0    2.88    0.40
  21  -1   0    3.00    0.49
 -21   1   0    2.77    0.48
 -21  -1   0    3.68    0.56
  21   1   0    2.55    0.39
  22  -1   0   -0.22    0.29
 -22  -1   0    0.26    0.32
 -22   1   0    0.25    0.29
  23  -1   0    0.26    0.31
   0  -2   0  163.01    1.57
   0  -2   0  162.45    1.39
   0   2   0  159.14    1.55
  -1   2   0   95.29    1.22
  -1  -2   0   97.12    1.18
  -1  -2   0   97.24    1.12
   1  -2   0  100.05    1.25
  -1  -2   0   97.24    1.12
   1   2   0   97.48    1.20
  -2   2   0  225.69    1.91
   2   2   0  222.71    1.84
  -2  -2   0  224.48    1.65
   2   2   0  223.85    1.81
   2  -2   0  227.81    1.52
   2  -2   0  230.46    1.94
   2   2   0  224.18    1.80
  -2  -2   0  230.38    1.81
  -2  -2   0  230.55    1.77
   3  -2   0  123.62    1.17
   3   2   0  122.71    1.46
  -3  -2   0  122.47    1.23
   3   2   0  122.97    1.35
  -3   2   0  120.87    1.44
  -3  -2   0  124.97    1.44
   3   2   0  125.17    1.40
  -3  -2   0  123.83    1.29
   3  -2   0  119.66    1.43
  -4  -2   0  138.86    0.96
   4   2   0  132.46    1.63
  -4   2   0  132.43    1.36
   4  -2   0  134.79    1.32
  -4  -2   0  133.64    1.59
  -4  -2   0  135.35    1.37
   4   2   0  133.60    1.43
   4  -2   0  130.72    1.56
   4   2   0  134.82    1.51
  -4  -2   0  133.26    1.33
  -5  -2   0   24.26    0.72
  -5  -2   0   25.01    0.40
  -5  -2   0   24.66    0.62
   5   2   0   24.63    0.76
   5  -2   0   24.34    0.70
   5  -2   0   24.43    0.60
   5   2   0   25.56    0.69
   5   2   0   25.30    0.62
  -5   2   0   25.09    0.63
  -6   2   0   19.56    0.59
  -6  -2   0   21.77    0.62
   6  -2   0   20.28    0.58
   6   2   0   20.07    0.65
   6   2   0   21.10    0.59
  -6  -2   0   19.33    0.39
   6  -2   0   19.83    0.65
  -6  -2   0   22.04    0.72
   6   2   0   21.06    0.74
   7   2   0   92.31    1.49
   7   2   0   89.92    0.97
   7  -2   0   90.64    1.31
  -7   2   0   92.62    1.36
  -7  -2   0   92.32    0.92
   7   2   0   93.00    1.25
  -7  -2   0   90.44    1.36
   7   2   0   92.80    1.65
   7  -2   0   90.34    1.42
  -7  -2   0   91.06    1.55
   8   2   0   72.81    1.40
  -8  -2   0   75.41    1.47
   8   2   0   74.95    1.17
   8  -2   0   74.71    1.27
  -8   2   0   74.24    1.28
   8   2   0   75.54    0.94
  -8  -2   0   76.19    1.31
   8  -2   0   76.82    1.51
  -8  -2   0   70.67    0.91
   9  -2   0   12.08    0.64
  -9  -2   0   11.86    0.41
  -9   2   0   11.83    0.55
  -9  -2   0   12.73    0.65
   9  -2   0   12.96    0.57
   9   2   0   13.78    0.51
   9   2   0   12.66    0.41
   9   2   0   12.80    0.64
  10   2   0    5.89    0.37
  10   2   0    5.75    0.30
 -10  -2   0    5.38    0.30
 -10  -2   0    5.34    0.46
  10  -2   0    5.78    0.47
 -10   2   0    5.50    0.40
  11   2   0    0.12    0.08
 -11  -2   0   -0.05    0.08
 -11   2   0    0.10    0.14
  11   2   0    0.52    0.16
  11  -2   0    0.13    0.17
 -11  -2   0    0.10    0.19
  12   2   0   20.12    0.61
 -12  -2   0   20.87    0.93
 -12   2   0   20.71    0.83
  12  -2   0   18.73    0.90
  13   2   0    0.39    0.13
  13  -2   0    0.68    0.25
 -13  -2   0    0.41    0.22
 -13   2   0    0.70    0.24
 -14  -2   0    3.54    0.47
 -14   2   0    2.71    0.37
  14   2   0    3.44    0.30
  14  -2   0    2.99    0.40
  15  -2   0   -0.05    0.19
 -15  -2   0    0.31    0.25
  15   2   0    0.13    0.13
 -15   2   0    0.06    0.20
  16  -2   0    2.45    0.41
  16   2   0    2.07    0.26
 -16  -2   0    2.60    0.43
 -16   2   0    2.34    0.39
  17  -2   0    3.76    0.51
 -17  -2   0    3.30    0.49
 -17   2   0    3.49    0.48
  17   2   0    3.25    0.33
 -18   2   0    1.26    0.33
  18  -2   0    1.23    0.38
  18   2   0    0.72    0.20
 -18  -2   0    0.55    0.27
 -19  -2   0    0.46    0.34
  19  -2   0    0.42    0.26
 -19   2   0    0.04    0.24
 -20   2   0    0.69    0.34
  20  -2   0   -0.05    0.27
 -20  -2   0    0.94    0.44
 -21   2   0    0.65    0.34
  21  -2   0    0.25    0.31
  22  -2   0   -0.35    0.34
 -22   2   0    0.22    0.30
   0  -3   0    0.02    0.09
   0  -3   0   -0.10    0.08
   0  -3   0    0.04    0.10
   0   3   0   -0.05    0.11
  -1  -3   0    0.14    0.11
  -1   3   0   -0.06    0.13
  -1  -3   0    0.02    0.09
   1   3   0   -0.09    0.12
  -1  -3   0    0.02    0.09
  -2  -3   0    9.59    0.41
  -2   3   0   10.33    0.51
  -2  -3   0    9.01    0.44
  -2  -3   0   10.33    0.45
   2   3   0    9.85    0.48
   2  -3   0    9.45    0.37
   3  -3   0    0.14    0.08
  -3  -3   0    0.13    0.09
   3   3   0   -0.02    0.11
  -3  -3   0   -0.03    0.07
   3   3   0    0.05    0.09
  -3   3   0    0.12    0.12
  -3  -3   0    0.03    0.10
   4   3   0    9.85    0.49
  -4  -3   0    9.49    0.49
  -4  -3   0   10.12    0.42
  -4  -3   0    9.81    0.46
   4  -3   0   10.03    0.41
   4   3   0   10.04    0.50
   4   3   0    9.36    0.51
  -5  -3   0   38.78    0.85
   5   3   0   38.95    1.07
   5  -3   0   38.40    0.83
   5   3   0   37.80    0.95
  -5  -3   0   40.37    0.90
  -5  -3   0   40.34    1.03
  -5  -3   0   40.25    0.64
   5   3   0   39.45    1.01
  -6  -3   0    7.57    0.26
  -6  -3   0    7.37    0.47
   6   3   0    7.97    0.48
  -6  -3   0    6.94    0.38
   6   3   0    7.57    0.44
   6  -3   0    7.87    0.40
  -7   3   0   20.14    0.71
   7  -3   0   21.45    0.69
  -7  -3   0   21.21    0.43
  -7  -3   0   21.09    0.69
  -7  -3   0   22.01    0.83
   7   3   0   20.73    0.78
   7   3   0   22.05    0.73
  -8  -3   0   22.98    0.89
   8   3   0   23.85    0.88
  -8  -3   0   23.51    0.48
  -8  -3   0   23.90    0.78
   8  -3   0   23.82    0.93
   8   3   0   23.76    0.77
  -8   3   0   23.37    0.79
  -9  -3   0   21.33    0.49
  -9   3   0   21.92    0.81
   9  -3   0   23.36    0.95
  -9  -3   0   20.76    0.87
  -9  -3   0   21.51    0.77
   9   3   0   21.21    0.75
  10   3   0   13.42    0.61
 -10  -3   0   12.64    0.63
 -10   3   0   13.25    0.65
 -10  -3   0   13.28    0.73
 -10  -3   0   12.93    0.41
  10  -3   0   13.58    0.77
 -11   3   0   35.53    1.10
  11   3   0   36.66    1.02
  11  -3   0   36.94    1.31
 -11  -3   0   33.11    1.19
 -11  -3   0   34.63    0.71
  12   3   0   16.01    0.71
 -12   3   0   15.64    0.77
  12  -3   0   15.66    0.89
 -12  -3   0   15.99    0.87
  13  -3   0    9.36    0.72
  13   3   0   10.51    0.58
 -13  -3   0   10.60    0.74
 -13   3   0    9.63    0.64
 -14  -3   0    3.68    0.48
  14   3   0    3.55    0.37
 -14   3   0    3.70    0.44
  14   3   0    3.01    0.27
  14  -3   0    4.02    0.50
  15   3   0    4.26    0.42
  15  -3   0    4.72    0.55
 -15   3   0    4.10    0.46
 -15  -3   0    4.82    0.55
 -16   3   0    1.15    0.33
  16  -3   0    1.55    0.35
  16   3   0    1.31    0.26
 -16  -3   0    2.04    0.43
 -17   3   0    2.64    0.44
  17   3   0    3.07    0.39
 -17  -3   0    2.86    0.50
  17  -3   0    2.40    0.45
 -18  -3   0    0.99    0.37
 -18   3   0    1.15    0.36
  18   3   0    1.31    0.30
  18  -3   0    1.92    0.43
 -19   3   0    0.95    0.37
 -19  -3   0    1.50    0.43
  19  -3   0    1.38    0.46
  19   3   0    1.28    0.30
 -20   3   0    1.88    0.43
  20  -3   0    2.24    0.49
 -20  -3   0    1.88    0.47
 -21   3   0    1.24    0.43
   0   4   0   45.88    1.22
   0  -4   0   46.86    1.05
   0  -4   0   45.48    1.12
  -1  -4   0   22.36    0.74
  -1   4   0   22.06    0.86
  -1  -4   0   22.10    0.75
   1   4   0   21.27    0.83
   1  -4   0   22.38    0.73
  -2  -4   0   18.80    0.67
  -2   4   0   19.70    0.80
   2  -4   0   19.15    0.61
  -2  -4   0   20.39    0.73
   2   4   0   20.04    0.80
   3   4   0   21.97    0.85
  -3  -4   0   22.04    0.69
  -3   4   0   22.06    0.86
  -3  -4   0   22.36    0.79
   3  -4   0   22.02    0.65
   4   4   0    7.06    0.49
  -4  -4   0    6.61    0.46
  -4  -4   0    5.91    0.37
   4  -4   0    6.77    0.38
  -5  -4   0   12.04    0.52
   5  -4   0   12.39    0.52
  -5  -4   0   11.96    0.41
  -5  -4   0   11.79    0.62
   5   4   0   12.53    0.65
   6   4   0   20.36    0.82
   6  -4   0   19.45    0.67
   6   4   0   20.21    0.82
  -6  -4   0   19.29    0.67
  -6  -4   0   18.84    0.82
  -6  -4   0   19.60    0.49
  -7  -4   0    8.63    0.57
  -7  -4   0    8.42    0.47
   7   4   0    8.65    0.55
   7   4   0    8.63    0.58
  -7  -4   0    8.56    0.31
   8  -4   0    0.38    0.21
   8   4   0    0.39    0.17
   8   4   0    0.25    0.16
  -8  -4   0    0.41    0.16
  -8  -4   0    0.65    0.22
  -8  -4   0    0.44    0.09
   9  -4   0   -0.13    0.23
  -9  -4   0    0.05    0.13
   9   4   0   -0.09    0.17
  -9  -4   0   -0.28    0.23
  10  -4   0    6.08    0.57
 -10  -4   0    5.45    0.52
 -10  -4   0    5.85    0.46
  10   4   0    5.85    0.49
 -11  -4   0    8.63    0.66
  11  -4   0    8.55    0.70
 -11   4   0    9.99    0.64
  11   4   0    8.79    0.59
  12  -4   0    1.11    0.33
 -12  -4   0    1.14    0.33
  12   4   0    1.32    0.28
 -12   4   0    0.91    0.26
  13  -4   0    2.85    0.48
 -13  -4   0    2.97    0.45
  13   4   0    3.35    0.39
 -13   4   0    2.86    0.40
  14  -4   0    1.75    0.41
  14   4   0    1.24    0.30
 -14  -4   0    1.33    0.36
 -14   4   0    1.17    0.30
  15  -4   0    1.22    0.39
 -15   4   0    1.26    0.32
  15   4   0    1.29    0.30
 -15  -4   0    1.25    0.38
  16   4   0   -0.03    0.20
 -16   4   0    0.16    0.24
  16  -4   0    0.14    0.33
 -16  -4   0    0.25    0.28
 -17   4   0    0.05    0.23
 -17  -4   0    0.50    0.30
  17   4   0   -0.28    0.24
  17  -4   0   -0.20    0.24
 -18   4   0    0.71    0.33
  18   4   0    0.59    0.25
 -18  -4   0    0.44    0.35
  18  -4   0    1.10    0.43
 -19  -4   0    0.15    0.32
 -19   4   0    0.28    0.31
 -20   4   0    0.64    0.35
   0  -5   0    0.14    0.17
   0   5   0    0.14    0.20
   0  -5   0   -0.05    0.14
   1  -5   0    6.99    0.43
  -1  -5   0    6.64    0.46
   1   5   0    7.55    0.58
  -1   5   0    6.86    0.55
   1  -5   0    7.23    0.47
   1  -5   0    6.95    0.52
  -1  -5   0    7.07    0.47
  -2  -5   0    2.01    0.28
   2   5   0    1.99    0.33
   2  -5   0    1.75    0.30
  -2   5   0    2.12    0.34
   2  -5   0    1.74    0.25
   2  -5   0    2.01    0.25
  -2  -5   0    1.93    0.25
   3   5   0    0.23    0.17
  -3   5   0    0.07    0.18
   3  -5   0   -0.13    0.15
   3  -5   0    0.23    0.13
  -3  -5   0    0.23    0.17
  -3  -5   0    0.15    0.13
  -4  -5   0    0.55    0.18
  -4  -5   0    0.67    0.18
   4   5   0    0.88    0.27
  -5  -5   0   12.03    0.56
  -5  -5   0   11.82    0.68
   5   5   0   10.57    0.69
  -6  -5   0   13.55    0.60
  -6  -5   0   14.34    0.77
   6   5   0   13.42    0.76
  -7  -5   0    5.27    0.50
   7  -5   0    5.30    0.53
   7   5   0    5.78    0.54
  -7  -5   0    5.48    0.40
   8   5   0    1.65    0.33
  -8  -5   0    1.64    0.33
   8  -5   0    1.29    0.32
  -8  -5   0    1.27    0.24
   9   5   0    0.74    0.25
   9  -5   0    0.68    0.29
  -9  -5   0    1.02    0.28
  -9  -5   0    0.98    0.22
 -10  -5   0    2.97    0.44
 -10  -5   0    2.57    0.33
  10   5   0    2.39    0.38
  10  -5   0    2.92    0.49
  11   5   0    4.25    0.49
 -11  -5   0    3.96    0.50
  11  -5   0    3.17    0.49
  12   5   0    3.85    0.47
  12  -5   0    4.12    0.60
 -12  -5   0    3.80    0.52
  13  -5   0    2.49    0.48
 -13  -5   0    2.36    0.45
  13   5   0    1.98    0.35
 -14  -5   0    0.05    0.25
  14   5   0   -0.10    0.21
  14  -5   0   -0.34    0.34
  15  -5   0    0.53    0.31
 -15  -5   0    0.58    0.34
  15   5   0    0.51    0.28
 -16  -5   0    1.70    0.43
  16  -5   0    1.09    0.43
  16   5   0    0.81    0.32
 -17  -5   0    2.00    0.49
   0   6   0    0.92    0.32
   0  -6   0    0.69    0.22
  -1  -6   0    2.02    0.30
   1   6   0    2.36    0.41
  -1   6   0    2.08    0.41
  -2  -6   0    0.56    0.20
  -2   6   0    1.12    0.33
   2   6   0    0.27    0.27
  -3  -6   0    4.58    0.45
   3  -6   0    4.42    0.49
   3   6   0    5.00    0.56
   4   6   0    2.44    0.40
   4  -6   0    2.93    0.41
  -4  -6   0    2.81    0.37
   5  -6   0   -0.32    0.31
  -5  -6   0    0.49    0.24
   5   6   0    0.32    0.25
  -6  -6   0    0.60    0.26
   6   6   0    0.27    0.24
   6  -6   0    0.44    0.26
   7   6   0    0.64    0.29
  -7  -6   0    0.52    0.22
   7  -6   0    0.58    0.27
   8  -6   0    1.19    0.34
   8   6   0    1.93    0.39
  -8  -6   0    1.65    0.33
  -9  -6   0    2.26    0.40
   9  -6   0    2.25    0.47
   9   6   0    1.70    0.38
  10  -6   0    0.23    0.28
  10   6   0    0.67    0.27
 -10  -6   0   -0.03    0.23
  11  -6   0    0.09    0.27
  11   6   0   -0.22    0.25
 -11  -6   0   -0.16    0.25
 -12  -6   0    0.69    0.33
  12   6   0    0.31    0.27
  12  -6   0    0.29    0.29
  13   6   0    0.91    0.35
  13  -6   0    0.58    0.38
 -13  -6   0    0.82    0.38
 -14  -6   0    0.71    0.35
  14   6   0    0.40    0.28
 -15  -6   0    0.67    0.40
 -16  -6   0    0.78    0.41
   0   7   0    0.97    0.33
   1   7   0    0.53    0.31
  -1   7   0    0.41    0.30
   2   7   0   -0.12    0.26
   3  -7   0   -0.08    0.26
   3   7   0    0.26    0.31
   4   7   0    0.45    0.31
   4  -7   0    1.49    0.35
   5   7   0    0.52    0.34
   5  -7   0    0.12    0.25
   6  -7   0    0.11    0.26
   6   7   0    0.54    0.33
   7   7   0    1.48    0.42
   7  -7   0    1.33    0.41
   8   7   0    1.31    0.41
   8  -7   0    0.51    0.33
   9  -7   0    1.16    0.42
   9   7   0    1.60    0.42
  10  -7   0    1.01    0.38
  10   7   0    0.30    0.28
  11   7   0    0.39    0.32
  12   7   0   -0.12    0.30
  24   0  -1    0.26    0.28
  23   0  -1   -0.22    0.24
  22   0  -1    0.32    0.30
 -22   0   1    0.10    0.32
  21   0  -1    0.21    0.25
 -21   0   1   -0.37    0.31
  20   0  -1    0.00    0.20
 -20   0   1    0.39    0.29
  19   0  -1    0.12    0.22
 -19   0   1   -0.11    0.24
 -18   0   1    0.30    0.26
  18   0  -1    0.09    0.19
  17   0  -1   -0.27    0.21
 -17   0   1    0.31    0.26
 -16   0   1    0.15    0.22
  16   0  -1    0.17    0.18
 -15   0   1   -0.07    0.21
  15   0  -1   -0.15    0.18
  14   0  -1    0.03    0.14
 -14   0   1   -0.08    0.19
 -13   0   1   -0.09    0.18
  13   0  -1   -0.10    0.14
  12   0  -1   -0.03    0.13
 -12   0   1    0.04    0.15
  11   0  -1   -0.12    0.12
  10   0  -1    0.02    0.12
 -10   0   1    0.00    0.11
   9   0  -1   -0.07    0.11
   9   0  -1    0.00    0.11
  -9   0   1    0.08    0.09
  -8   0   1   -0.06    0.08
   8   0  -1   -0.04    0.10
   7   0  -1   -0.06    0.10
  -7   0   1    0.09    0.11
  -7   0   1    0.02    0.07
   7   0  -1    0.04    0.09
  -6   0   1   -0.02    0.07
   6   0  -1   -0.06    0.07
   6   0  -1    0.14    0.08
   5   0  -1   -0.08    0.07
   5   0  -1    0.06    0.06
  -5   0   1    0.07    0.06
  -4   0   1   -0.01    0.03
   4   0  -1    0.03    0.05
   4   0  -1   -0.02    0.05
  -4   0   1    0.01    0.05
  -3   0   1   -0.02    0.03
   3   0   1    0.02    0.05
   3   0   1    0.02    0.04
  -3   0  -1    0.00    0.05
  -3   0  -1   -0.05    0.05
   4   0   1   -0.01    0.06
  -4   0  -1   -0.03    0.06
   4   0   1    0.01    0.06
  -4   0  -1    0.05    0.07
   5   0   1   -0.05    0.08
   5   0   1   -0.05    0.07
   5   0   1    0.06    0.08
  -5   0  -1    0.04    0.08
   6   0   1    0.03    0.06
   6   0   1   -0.04    0.07
  -6   0  -1   -0.07    0.09
   6   0   1    0.07    0.08
  -7   0  -1    0.11    0.11
   7   0   1    0.16    0.11
   7   0   1   -0.05    0.09
   7   0   1    0.01    0.07
   8   0   1    0.11    0.12
  -8   0  -1    0.10    0.11
   8   0   1   -0.08    0.11
   8   0   1    0.11    0.10
  -9   0  -1    0.31    0.16
   9   0   1    0.09    0.11
 -10   0  -1    0.28    0.18
  10   0   1    0.00    0.11
 -11   0  -1   -0.14    0.14
  11   0   1   -0.10    0.12
 -12   0  -1    0.16    0.17
  12   0   1   -0.23    0.14
  13   0   1    0.10    0.16
 -13   0  -1    0.18    0.21
  14   0   1    0.00    0.14
 -14   0  -1    0.28    0.21
  15   0   1   -0.37    0.22
 -15   0  -1    0.24    0.20
  16   0   1   -0.37    0.24
  17   0   1   -0.15    0.19
 -17   0  -1   -0.12    0.25
 -18   0  -1    0.06    0.25
  18   0   1    0.18    0.20
 -19   0  -1    0.37    0.26
  19   0   1   -0.07    0.21
  20   0   1   -0.34    0.27
 -20   0  -1   -0.24    0.31
  21   0   1   -0.04    0.23
 -21   0  -1   -0.12    0.29
  22   0   1   -0.11    0.22
  24  -1  -1    0.01    0.31
  23  -1  -1   -0.24    0.27
  22  -1  -1   -0.12    0.27
 -22   1   1    0.36    0.35
 -22  -1   1    0.44    0.34
  22   1  -1    0.42    0.24
 -21  -1   1    0.00    0.26
 -21   1   1   -0.34    0.28
  21  -1  -1    0.07    0.25
  21   1  -1    0.38    0.24
 -20  -1   1    0.29    0.24
 -20   1   1    0.39    0.27
  20  -1  -1    0.19    0.24
  20   1  -1    0.23    0.21
 -19   1   1    0.94    0.35
  19   1  -1    1.25    0.30
  19  -1  -1    0.83    0.29
 -19  -1   1    0.62    0.32
  18  -1  -1    1.45    0.32
 -18   1   1    1.63    0.38
 -18  -1   1    2.12    0.40
  18   1  -1    1.66    0.30
 -17   1   1    0.28    0.22
  17  -1  -1    0.28    0.20
  17   1  -1    0.51    0.21
  16   1  -1    1.57    0.27
 -16   1   1    1.12    0.28
  16  -1  -1    1.31    0.30
 -16  -1   1    1.85    0.36
 -15   1   1    0.37    0.23
 -15  -1   1    0.49    0.25
  15   1  -1    0.41    0.18
  15  -1  -1    0.28    0.18
 -14  -1   1    1.90    0.33
 -14   1   1    1.70    0.31
  14  -1  -1    1.60    0.27
  14   1  -1    2.06    0.26
  13  -1  -1    0.16    0.16
 -13  -1   1    0.19    0.20
  13   1  -1   -0.06    0.12
 -13   1   1   -0.02    0.14
 -12   1   1    0.33    0.15
  12  -1  -1    0.36    0.18
 -12  -1   1    0.13    0.16
 -12  -1   1    0.19    0.11
  12   1  -1    0.37    0.15
 -11  -1   1    1.28    0.18
  11   1  -1    1.51    0.20
  11  -1  -1    1.34    0.23
 -11   1   1    1.41    0.23
 -11  -1   1    1.58    0.27
 -10  -1   1    0.56    0.13
  10  -1  -1    0.51    0.18
 -10   1   1    0.63    0.17
  10   1  -1    0.67    0.14
 -10  -1   1    0.78    0.21
   9   1  -1    2.02    0.24
  -9  -1   1    2.07    0.25
   9  -1  -1    2.17    0.26
  -9   1   1    1.67    0.21
   9  -1  -1    2.46    0.26
  -9  -1   1    2.34    0.21
   9   1  -1    1.92    0.19
   8  -1  -1   14.50    0.56
  -8  -1   1   13.82    0.56
   8  -1  -1   15.11    0.58
   8   1  -1   14.79    0.57
  -8   1   1   14.05    0.54
   8   1  -1   14.27    0.44
   8   1  -1   14.52    0.61
  -8  -1   1   14.76    0.47
   7   1  -1    0.54    0.13
   7   1  -1    0.64    0.12
   7  -1  -1    0.65    0.14
  -7  -1   1    0.95    0.17
  -7  -1   1    0.78    0.11
   7  -1  -1    0.66    0.13
  -7   1   1    0.66    0.14
   7   1  -1    0.75    0.11
   6   1  -1    5.28    0.32
  -6  -1   1    5.17    0.24
   6   1  -1    5.42    0.23
  -6   1   1    5.29    0.29
   6  -1  -1    5.37    0.32
   6   1  -1    5.22    0.29
   6  -1  -1    5.27    0.29
  -6  -1   1    5.21    0.31
   5   1  -1    0.37    0.09
   5   1  -1    0.40    0.07
  -5  -1   1    0.43    0.07
  -5  -1   1    0.45    0.10
   5   1  -1    0.62    0.12
  -5   1   1    0.43    0.09
   5  -1  -1    0.45    0.10
   5  -1  -1    0.39    0.09
   4   1  -1   44.84    0.65
   4  -1  -1   47.35    0.72
   4   1  -1   47.40    0.60
   4   1  -1   45.75    0.76
  -4  -1   1   45.36    0.57
   4  -1  -1   45.63    0.78
  -4  -1   1   45.42    0.73
  -4   1   1   44.67    0.71
   3   1  -1   43.75    0.53
   3   1  -1   43.82    0.65
  -3  -1   1   43.59    0.63
   3  -1  -1   42.85    0.69
   3   1  -1   43.20    0.62
  -3  -1   1   43.97    0.50
  -3  -1   1   41.93    0.53
  -3   1   1   42.16    0.64
   3  -1  -1   44.07    0.64
  -2  -1   1  211.08    1.27
   2   1  -1  208.38    1.31
   2   1  -1  211.46    1.21
   2  -1  -1  210.40    1.34
  -2  -1   1  212.07    1.16
   2  -1  -1  206.41    1.32
  -1   1   1   27.48    0.45
   1  -1  -1   28.13    0.46
   1  -1  -1   27.79    0.43
  -1  -1   1   29.10    0.47
   1   1  -1   28.67    0.48
  -1  -1   1   27.71    0.34
   1   1  -1   27.98    0.35
   0  -1  -1   26.77    0.33
   0   1  -1   26.26    0.47
   0  -1  -1   25.97    0.53
   0  -1   1   25.92    0.45
   0   1   1   25.89    0.42
   0  -1  -1   26.50    0.42
   1  -1   1   68.74    0.49
  -1   1  -1   67.25    0.50
  -1   1  -1   69.29    0.77
   1  -1   1   67.99    0.77
   1   1   1   68.82    0.66
   1   1   1   67.70    0.84
  -1  -1  -1   70.08    0.86
  -1  -1  -1   68.54    0.65
   1   1   1   68.72    0.88
  -1  -1  -1   69.13    0.85
  -2  -1  -1   59.79    0.85
   2  -1   1   59.54    0.55
   2  -1   1   58.66    0.75
   2   1   1   58.19    0.83
   2   1   1   58.65    0.86
  -2  -1  -1   60.10    0.59
  -2  -1  -1   58.83    0.80
  -2   1  -1   58.28    0.59
  -2   1  -1   58.22    0.73
   2   1   1   59.76    0.61
   3   1   1    1.85    0.17
   3  -1   1    1.95    0.14
  -3  -1  -1    2.00    0.17
   3   1   1    2.07    0.18
  -3   1  -1    1.95    0.13
   3  -1   1    2.09    0.14
  -3  -1  -1    2.11    0.18
   3   1   1    2.13    0.12
   4  -1   1    6.11    0.27
  -4  -1  -1    6.44    0.34
  -4   1  -1    6.25    0.26
   4   1   1    6.52    0.22
   4   1   1    6.32    0.32
   4   1   1    6.55    0.34
   4   1   1    6.79    0.17
  -4  -1  -1    6.73    0.32
   4  -1   1    6.63    0.27
   5   1   1    3.40    0.27
   5   1   1    3.37    0.15
  -5  -1  -1    3.61    0.26
   5  -1   1    3.56    0.23
  -5  -1  -1    3.21    0.27
   5   1   1    3.17    0.24
  -6  -1  -1    6.42    0.37
   6  -1   1    6.35    0.33
  -6  -1  -1    6.94    0.40
   6   1   1    6.50    0.39
   6   1   1    5.97    0.24
   6   1   1    6.84    0.38
  -7  -1  -1    0.39    0.15
   7  -1   1    0.14    0.08
   7   1   1    0.20    0.06
  -7  -1  -1    0.16    0.12
   7   1   1    0.15    0.10
   7   1   1    0.27    0.13
  -8  -1  -1   32.20    0.94
   8   1   1   30.37    0.64
   8  -1   1   30.58    0.88
   8  -1   1   31.02    0.86
   8   1   1   30.30    0.92
   9   1   1    6.29    0.32
   9  -1   1    5.90    0.42
  -9  -1  -1    7.37    0.49
   9  -1   1    7.02    0.44
  10  -1   1    3.98    0.36
 -10  -1  -1    3.94    0.39
  10   1   1    3.96    0.28
 -10   1  -1    3.39    0.33
  11  -1   1   -0.03    0.13
 -11   1  -1   -0.01    0.14
 -11  -1  -1    0.14    0.18
  11   1   1   -0.09    0.11
  12   1   1    2.34    0.25
 -12   1  -1    2.19    0.29
  12  -1   1    2.40    0.32
 -12  -1  -1    2.68    0.38
  13  -1   1    1.94    0.31
  13   1   1    1.95    0.25
 -13   1  -1    1.84    0.31
 -13  -1  -1    2.10    0.35
 -14  -1  -1    2.34    0.37
 -14   1  -1    1.79    0.32
  14   1   1    2.22    0.28
  14  -1   1    1.58    0.29
  15  -1   1    0.13    0.19
 -15  -1  -1    0.36    0.21
  15   1   1    0.39    0.17
 -15   1  -1    0.40    0.24
 -16   1  -1    0.05    0.21
 -16  -1  -1    0.52    0.30
  16  -1   1    0.17    0.24
  16   1   1    0.07    0.15
  17   1   1    6.32    0.51
  17  -1   1    7.12    0.63
 -17   1  -1    6.30    0.59
 -17  -1  -1    6.72    0.65
  18  -1   1    0.57    0.29
 -18  -1  -1    0.93    0.31
 -18   1  -1    0.34    0.30
  18   1   1    0.69    0.24
  19   1   1    0.30    0.22
  19  -1   1   -0.41    0.28
 -19  -1  -1    0.37    0.35
 -19   1  -1    0.01    0.24
 -20   1  -1    0.22    0.27
  20   1   1    0.66    0.26
  20  -1   1    0.18    0.23
 -21  -1  -1    0.65    0.39
 -21   1  -1    0.74    0.36
  21  -1   1    0.03    0.26
  22  -1   1    0.44    0.31
  23  -1   1   -0.35    0.33
 -22   2   1    0.15    0.31
 -22  -2   1    0.03    0.30
  22  -2  -1    0.24    0.27
 -21  -2   1    0.08    0.31
  21  -2  -1   -0.54    0.36
 -21   2   1    0.14    0.29
 -20   2   1    0.14    0.28
  20  -2  -1   -0.35    0.30
 -20  -2   1    0.08    0.26
 -19   2   1   -0.02    0.22
  19  -2  -1   -0.29    0.32
  19   2  -1    0.09    0.18
  18  -2  -1    1.40    0.39
  18   2  -1    0.25    0.16
 -18   2   1    1.05    0.34
 -18  -2   1    1.13    0.35
  17  -2  -1    2.51    0.43
 -17   2   1    2.05    0.39
 -17  -2   1    2.75    0.44
  17   2  -1    2.36    0.30
 -16  -2   1    5.96    0.59
  16  -2  -1    6.83    0.61
  16   2  -1    5.88    0.42
 -16   2   1    5.72    0.53
  15  -2  -1    3.40    0.43
  15   2  -1    3.52    0.32
 -15   2   1    3.60    0.43
 -15  -2   1    4.12    0.47
 -14   2   1    0.13    0.19
  14  -2  -1    0.20    0.22
 -14  -2   1    0.12    0.20
  14   2  -1   -0.02    0.12
 -13   2   1    2.23    0.31
 -13  -2   1    2.35    0.25
 -13  -2   1    2.89    0.42
  13  -2  -1    2.19    0.36
  13   2  -1    2.40    0.24
 -12  -2   1   16.48    0.60
 -12  -2   1   17.18    0.81
  12   2  -1   17.13    0.58
 -12   2   1   16.17    0.74
  12  -2  -1   15.96    0.80
 -11   2   1    1.16    0.22
  11   2  -1    1.55    0.24
 -11  -2   1    1.22    0.18
 -11  -2   1    1.64    0.29
  11  -2  -1    1.35    0.27
  11   2  -1    1.42    0.18
  10   2  -1    1.39    0.17
 -10   2   1    1.40    0.24
  10   2  -1    1.12    0.21
  10   2  -1    1.73    0.24
  10  -2  -1    1.59    0.27
 -10  -2   1    1.53    0.25
 -10  -2   1    1.31    0.17
   9   2  -1   12.43    0.51
   9   2  -1   12.54    0.58
   9   2  -1   11.42    0.42
  -9  -2   1   11.52    0.42
   9  -2  -1   12.03    0.62
  -9   2   1   11.35    0.55
  -9  -2   1   11.94    0.60
   8   2  -1   14.28    0.53
  -8   2   1   13.67    0.57
   8   2  -1   13.18    0.44
  -8  -2   1   14.19    0.62
   8   2  -1   14.02    0.57
   8  -2  -1   14.89    0.65
  -8  -2   1   12.82    0.41
   8  -2  -1   13.24    0.54
   8   2  -1   13.20    0.64
   7   2  -1    2.11    0.17
   7   2  -1    2.00    0.21
  -7  -2   1    2.37    0.17
   7   2  -1    2.53    0.23
  -7  -2   1    2.10    0.25
   7  -2  -1    2.41    0.27
  -7   2   1    2.58    0.25
   7  -2  -1    2.12    0.21
   7   2  -1    2.03    0.25
   6  -2  -1    3.31    0.29
   6  -2  -1    3.44    0.25
  -6  -2   1    3.61    0.19
   6   2  -1    4.00    0.27
   6   2  -1    3.59    0.26
  -6  -2   1    3.40    0.28
  -6  -2   1    3.75    0.24
  -6   2   1    3.59    0.27
   6   2  -1    4.09    0.32
   5  -2  -1   28.30    0.75
   5  -2  -1   30.18    0.69
  -5  -2   1   28.48    0.72
   5  -2  -1   29.31    0.79
  -5  -2   1   29.05    0.60
   5   2  -1   28.78    0.76
   5   2  -1   30.26    0.72
  -5   2   1   29.17    0.71
  -5  -2   1   29.69    0.55
   5   2  -1   28.68    0.65
  -4  -2   1    5.93    0.25
   4   2  -1    6.32    0.33
  -4  -2   1    5.67    0.28
   4  -2  -1    5.86    0.33
   4   2  -1    6.27    0.28
  -4  -2   1    6.18    0.26
   4  -2  -1    5.56    0.33
  -4  -2   1    5.70    0.30
   4   2  -1    5.83    0.31
   4  -2  -1    5.82    0.30
   3   2  -1    0.58    0.10
   3   2  -1    0.60    0.09
  -3  -2   1    0.43    0.09
   3   2  -1    0.65    0.12
  -3  -2   1    0.60    0.08
   3  -2  -1    0.63    0.11
  -3  -2   1    0.50    0.10
   3  -2  -1    0.61    0.12
  -2  -2   1   68.82    1.00
   2  -2  -1   69.09    1.04
   2   2  -1   70.13    0.91
  -2  -2   1   69.70    0.89
  -2  -2   1   70.78    0.73
  -2   2   1   68.58    1.02
   2   2  -1   67.18    1.03
  -1  -2   1   65.22    0.79
   1   2  -1   64.11    1.01
  -1   2   1   64.77    0.98
  -1  -2   1   66.78    1.00
   1  -2  -1   65.47    0.99
  -1  -2   1   66.77    0.77
   0  -2  -1   10.43    0.40
   0   2   1   10.24    0.39
   0   2  -1    9.85    0.40
   0  -2  -1   11.00    0.43
   0  -2  -1   10.32    0.38
   0  -2   1   10.58    0.40
   0  -2   1   10.76    0.30
  -1  -2  -1    0.17    0.08
  -1  -2  -1    0.22    0.09
   1   2   1    0.11    0.07
   1  -2   1    0.25    0.05
   1  -2   1    0.29    0.08
  -1   2  -1    0.24    0.10
  -1  -2  -1    0.24    0.08
   2   2   1    0.24    0.09
  -2  -2  -1    0.28    0.10
   2   2   1    0.06    0.08
  -2  -2  -1    0.21    0.08
  -2  -2  -1    0.03    0.08
   2   2   1    0.12    0.08
  -2   2  -1    0.10    0.09
   2  -2   1    0.23    0.10
   2  -2   1    0.17    0.05
   3   2   1   16.76    0.59
  -3  -2  -1   15.86    0.26
  -3   2  -1   16.17    0.54
  -3  -2  -1   16.75    0.58
   3  -2   1   15.48    0.53
  -3   2  -1   15.66    0.42
   3   2   1   15.78    0.47
   3   2   1   16.00    0.57
  -3  -2  -1   16.34    0.45
  -3  -2  -1   16.66    0.53
   3  -2   1   16.69    0.40
   4   2   1    4.51    0.33
   4  -2   1    3.96    0.22
  -4  -2  -1    4.47    0.24
   4   2   1    4.21    0.25
  -4  -2  -1    4.49    0.33
  -4   2  -1    4.38    0.24
  -4  -2  -1    4.18    0.28
   4  -2   1    4.10    0.28
   4   2   1    4.11    0.30
  -4  -2  -1    3.80    0.11
  -5  -2  -1    5.51    0.33
   5  -2   1    5.15    0.33
   5   2   1    4.83    0.34
   5  -2   1    5.67    0.28
  -5  -2  -1    5.24    0.37
   5   2   1    5.21    0.28
   5   2   1    5.32    0.37
  -5  -2  -1    4.34    0.14
  -5   2  -1    5.15    0.29
   6  -2   1    1.58    0.20
   6   2   1    1.80    0.24
  -6  -2  -1    1.77    0.22
  -6  -2  -1    1.81    0.25
   6  -2   1    1.96    0.19
   6   2   1    1.60    0.16
  -6  -2  -1    1.50    0.10
  -6   2  -1    1.71    0.19
   6   2   1    1.73    0.22
  -7  -2  -1   21.04    0.79
   7  -2   1   20.64    0.68
   7  -2   1   22.24    0.66
  -7   2  -1   22.44    0.67
  -7  -2  -1   21.33    0.41
   7   2   1   21.87    0.78
   7   2   1   23.48    0.62
   7   2   1   22.23    0.42
  -7  -2  -1   22.22    0.74
   8   2   1   14.06    0.67
  -8   2  -1   13.92    0.57
  -8  -2  -1   14.49    0.68
   8   2   1   15.03    0.50
   8   2   1   14.57    0.37
  -8  -2  -1   14.64    0.62
   8  -2   1   13.89    0.56
  -9  -2  -1    5.85    0.44
   9   2   1    6.44    0.27
   9  -2   1    5.71    0.41
  -9  -2  -1    6.13    0.46
  -9   2  -1    5.31    0.38
   9  -2   1    5.35    0.44
   9   2   1    5.91    0.34
 -10  -2  -1    0.12    0.17
 -10  -2  -1    0.05    0.15
  10   2   1    0.04    0.07
  10   2   1    0.32    0.15
 -10   2  -1   -0.02    0.14
  10  -2   1   -0.14    0.20
  11  -2   1   -0.12    0.20
  11   2   1    0.11    0.09
 -11   2  -1    0.20    0.16
  11   2   1    0.16    0.13
 -11  -2  -1    0.02    0.20
  12  -2   1    0.56    0.21
  12   2   1    1.40    0.23
 -12  -2  -1    1.18    0.29
 -12   2  -1    1.14    0.25
  12   2   1    1.03    0.15
 -13   2  -1    9.87    0.63
  13   2   1    9.49    0.50
 -13  -2  -1    9.60    0.70
  13  -2   1    8.41    0.63
  13   2   1    9.26    0.43
  14   2   1    0.47    0.18
  14   2   1    0.17    0.12
 -14  -2  -1    0.34    0.28
 -14   2  -1   -0.03    0.18
  14  -2   1    0.05    0.20
  15   2   1    2.43    0.27
 -15  -2  -1    2.49    0.44
  15  -2   1    2.17    0.39
 -15   2  -1    2.69    0.39
  16   2   1    2.55    0.28
  16  -2   1    2.45    0.43
 -16  -2  -1    3.22    0.49
 -16   2  -1    2.63    0.40
 -17  -2  -1    0.16    0.26
  17  -2   1    0.51    0.30
  17   2   1    0.25    0.16
 -17   2  -1    1.06    0.35
  18  -2   1    0.72    0.32
  18   2   1    1.22    0.26
 -18  -2  -1    0.50    0.30
 -18   2  -1    0.82    0.30
 -19  -2  -1    0.59    0.33
  19  -2   1    0.80    0.34
 -19   2  -1    1.06    0.36
  19   2   1    1.17    0.29
 -20  -2  -1    0.15    0.32
 -20   2  -1    0.02    0.28
  20  -2   1    0.24    0.29
  21  -2   1   -0.41    0.30
 -21   2  -1    0.21    0.30
  22  -2   1   -0.10    0.31
 -21   3   1    0.02    0.29
  21  -3  -1   -0.35    0.35
  20   3  -1    0.06    0.21
 -20   3   1   -0.27    0.25
 -20  -3   1    0.38    0.30
  19  -3  -1    0.32    0.34
  19   3  -1    0.00    0.21
 -19   3   1    0.10    0.27
 -19  -3   1    0.01    0.28
  18   3  -1    0.34    0.22
 -18  -3   1    0.32    0.32
 -18   3   1    0.37    0.28
  18  -3  -1    0.16    0.24
  17  -3  -1    1.22    0.40
  17   3  -1    0.74    0.26
 -17  -3   1    0.53    0.28
 -17   3   1    0.34    0.24
  16   3  -1    1.34    0.31
  16  -3  -1    1.15    0.33
 -16   3   1    1.16    0.33
 -16  -3   1    1.37    0.36
  15  -3  -1   12.22    0.85
 -15  -3   1   13.27    0.85
 -15   3   1   11.78    0.75
  15   3  -1   11.58    0.56
  15   3  -1   12.81    0.71
  14   3  -1    5.36    0.37
  14   3  -1    6.14    0.49
 -14   3   1    6.12    0.55
 -14  -3   1    7.30    0.62
  14  -3  -1    6.77    0.63
 -13   3   1    3.67    0.43
 -13  -3   1    3.85    0.47
  13   3  -1    3.67    0.39
  13  -3  -1    3.12    0.43
 -12  -3   1    2.67    0.24
 -12   3   1    3.27    0.38
  12   3  -1    2.63    0.32
  12  -3  -1    2.79    0.40
 -12  -3   1    2.83    0.38
  11  -3  -1   16.09    0.85
 -11   3   1   16.58    0.77
 -11  -3   1   16.11    0.53
  11   3  -1   16.82    0.73
 -11  -3   1   17.41    0.83
  10  -3  -1    9.41    0.64
 -10  -3   1    9.29    0.59
  10   3  -1    8.73    0.56
 -10   3   1    8.89    0.55
  10   3  -1    8.19    0.49
 -10  -3   1    8.97    0.37
  -9  -3   1    0.53    0.19
   9   3  -1    0.54    0.16
  -9  -3   1    0.68    0.11
   9   3  -1    0.45    0.15
   9  -3  -1    0.56    0.20
  -9   3   1    0.60    0.19
  -8   3   1    0.81    0.19
  -8  -3   1    0.76    0.15
  -8  -3   1    0.42    0.15
   8   3  -1    0.93    0.18
  -8  -3   1    0.74    0.11
   8  -3  -1    0.65    0.18
   8   3  -1    0.44    0.16
  -7  -3   1    2.81    0.19
  -7  -3   1    2.63    0.29
   7   3  -1    2.31    0.25
  -7  -3   1    2.43    0.23
   7  -3  -1    2.14    0.23
   7   3  -1    2.77    0.30
   7  -3  -1    2.27    0.29
   6   3  -1    5.70    0.37
  -6  -3   1    5.52    0.30
  -6  -3   1    5.59    0.38
   6  -3  -1    5.34    0.35
   6  -3  -1    5.55    0.41
   6   3  -1    5.25    0.39
   6   3  -1    5.30    0.38
  -6  -3   1    5.59    0.28
   5  -3  -1    9.83    0.45
   5   3  -1   10.48    0.52
  -5  -3   1    9.82    0.38
   5   3  -1   10.15    0.52
  -5  -3   1   10.33    0.39
  -5  -3   1   10.04    0.48
   5   3  -1    9.62    0.45
  -4  -3   1    5.86    0.35
   4   3  -1    6.00    0.37
   4  -3  -1    5.59    0.32
  -4  -3   1    5.70    0.28
   4   3  -1    5.66    0.38
   4   3  -1    6.35    0.34
  -3  -3   1    0.08    0.07
  -3  -3   1   -0.06    0.09
   3  -3  -1   -0.03    0.08
   3   3  -1    0.05    0.09
   3   3  -1   -0.01    0.10
  -2  -3   1   22.06    0.61
  -2  -3   1   21.37    0.68
  -2   3   1   22.38    0.73
  -2  -3   1   23.21    0.55
   2   3  -1   21.38    0.73
  -1  -3   1    0.41    0.10
  -1   3   1    0.48    0.14
  -1  -3   1    0.37    0.11
   1  -3  -1    0.22    0.09
   1   3  -1    0.43    0.15
   0   3  -1    1.62    0.22
   0  -3  -1    1.50    0.19
   0  -3  -1    1.54    0.21
   0  -3  -1    1.63    0.21
   0  -3   1    1.39    0.16
   0   3   1    1.30    0.19
  -1  -3  -1    5.51    0.36
   1   3   1    5.89    0.37
  -1  -3  -1    6.16    0.39
   1  -3   1    5.98    0.26
  -1  -3  -1    6.20    0.39
  -1   3  -1    5.82    0.39
  -2  -3  -1   31.91    0.84
   2   3   1   30.55    0.82
  -2  -3  -1   31.33    0.80
  -2  -3  -1   33.08    0.89
  -2   3  -1   32.60    0.91
   2  -3   1   31.78    0.61
  -3  -3  -1    4.74    0.33
   3  -3   1    5.13    0.26
   3   3   1    5.12    0.35
  -3   3  -1    5.05    0.37
  -3  -3  -1    5.17    0.33
   3   3   1    5.44    0.39
  -3  -3  -1    5.11    0.37
   4   3   1    0.86    0.18
   4   3   1    0.91    0.20
  -4  -3  -1    0.68    0.13
  -4   3  -1    0.79    0.18
  -4  -3  -1    0.39    0.14
  -4  -3  -1    0.79    0.17
  -4  -3  -1    0.50    0.07
   4   3   1    0.74    0.17
   4  -3   1    0.54    0.11
  -5  -3  -1   37.27    0.85
   5   3   1   35.92    1.05
   5   3   1   35.32    0.89
  -5  -3  -1   36.34    1.04
   5  -3   1   36.21    0.77
  -5  -3  -1   36.18    0.45
  -5  -3  -1   36.68    0.92
  -6  -3  -1   20.92    0.82
   6   3   1   20.70    0.82
  -6  -3  -1   20.01    0.61
   6   3   1   20.17    0.69
  -6  -3  -1   19.32    0.31
  -6  -3  -1   20.61    0.72
  -6   3  -1   19.80    0.65
   7  -3   1   21.98    0.66
  -7  -3  -1   21.29    0.75
  -7   3  -1   21.90    0.72
  -7  -3  -1   22.04    0.88
   7   3   1   21.52    0.72
   7   3   1   22.86    0.88
  -8  -3  -1   12.62    0.60
  -8   3  -1   12.31    0.58
   8  -3   1   12.29    0.54
   8   3   1   12.17    0.54
  -8  -3  -1   12.39    0.68
  -8  -3  -1   11.44    0.27
  -9  -3  -1    1.91    0.31
  -9  -3  -1    2.04    0.28
   9   3   1    2.48    0.27
  -9   3  -1    2.24    0.28
  10  -3   1    5.97    0.53
 -10  -3  -1    5.66    0.52
  10   3   1    6.19    0.42
 -10  -3  -1    6.72    0.50
 -10   3  -1    6.69    0.46
  11  -3   1    0.41    0.21
  11   3   1    0.66    0.18
 -11  -3  -1    0.63    0.22
 -11   3  -1    0.70    0.21
 -11  -3  -1    0.33    0.20
  12  -3   1    9.47    0.70
  12   3   1    8.54    0.50
 -12  -3  -1    9.11    0.67
 -12   3  -1    9.18    0.59
 -13   3  -1    1.77    0.28
  13   3   1    1.41    0.24
 -13  -3  -1    1.53    0.34
  13  -3   1    1.46    0.33
 -14   3  -1    0.21    0.21
  14  -3   1    0.08    0.20
 -14  -3  -1    0.65    0.32
  14   3   1   -0.15    0.18
  15  -3   1    2.54    0.43
  15   3   1    2.97    0.35
 -15   3  -1    2.08    0.35
 -15  -3  -1    2.82    0.47
  16   3   1    1.03    0.25
  16  -3   1    0.66    0.31
 -16   3  -1    0.86    0.27
 -16  -3  -1    1.11    0.36
  17   3   1    0.58    0.22
 -17  -3  -1    0.57    0.33
  17  -3   1    0.36    0.26
 -17   3  -1    0.85    0.30
 -18  -3  -1    0.51    0.34
  18  -3   1    1.09    0.41
 -18   3  -1    0.38    0.29
  18   3   1   -0.29    0.24
 -19   3  -1    0.74    0.35
 -19  -3  -1    0.22    0.37
  19  -3   1    0.67    0.37
  20  -3   1    2.51    0.53
 -20   3  -1    1.59    0.44
 -20  -3  -1    2.09    0.49
 -21   3  -1   -0.11    0.31
 -20   4   1    0.02    0.29
 -19   4   1    0.39    0.34
 -19  -4   1    0.18    0.30
  19   4  -1   -0.32    0.28
  19  -4  -1    0.32    0.38
 -18  -4   1    0.26    0.31
  18   4  -1    0.39    0.28
  18  -4  -1    0.85    0.41
 -18   4   1   -0.20    0.30
 -17  -4   1    0.39    0.30
  17  -4  -1    0.59    0.38
  17   4  -1   -0.26    0.27
 -17   4   1    0.65    0.29
 -16  -4   1    2.07    0.44
 -16   4   1    1.37    0.36
  16  -4  -1    1.43    0.40
  15  -4  -1    0.00    0.25
 -15  -4   1    0.73    0.32
  15   4  -1   -0.21    0.24
 -15   4   1    0.20    0.23
 -14   4   1    4.55    0.50
  14  -4  -1    4.76    0.56
 -14  -4   1    4.48    0.53
  14   4  -1    4.29    0.46
  13  -4  -1    5.60    0.62
  13   4  -1    6.55    0.55
 -13   4   1    6.34    0.57
 -13  -4   1    5.61    0.55
  12   4  -1    3.07    0.39
 -12  -4   1    2.91    0.41
  12  -4  -1    2.87    0.44
  11   4  -1    5.43    0.48
 -11  -4   1    5.06    0.48
  11  -4  -1    5.30    0.55
  10  -4  -1   12.47    0.78
  10   4  -1   12.42    0.71
 -10  -4   1   12.67    0.73
  -9  -4   1    5.15    0.37
  -9  -4   1    4.30    0.26
   9  -4  -1    5.11    0.51
  -9  -4   1    4.54    0.45
   9   4  -1    4.66    0.45
   9   4  -1    4.41    0.42
  -8  -4   1    1.24    0.16
  -8  -4   1    1.55    0.22
   8   4  -1    1.34    0.24
   8  -4  -1    1.08    0.26
   8   4  -1    1.59    0.28
  -8  -4   1    1.00    0.22
   7   4  -1   10.67    0.62
  -7  -4   1   11.26    0.42
  -7  -4   1   10.38    0.59
  -7  -4   1   11.25    0.49
   7   4  -1   11.37    0.60
   7  -4  -1   11.13    0.67
  -6  -4   1   18.83    0.75
  -6  -4   1   17.67    0.57
  -6  -4   1   19.18    0.60
   6  -4  -1   18.12    0.82
   6   4  -1   18.75    0.81
   5   4  -1   10.79    0.60
  -5  -4   1    9.21    0.40
  -5  -4   1   10.66    0.55
   5   4  -1    9.94    0.59
   5  -4  -1    9.84    0.58
   5  -4  -1    9.91    0.48
  -4  -4   1    4.92    0.29
   4  -4  -1    4.76    0.34
  -4  -4   1    5.11    0.38
   4   4  -1    4.37    0.41
  -3   4   1    9.72    0.58
  -3  -4   1    9.97    0.50
   3   4  -1    9.41    0.57
   3  -4  -1    9.60    0.46
  -3  -4   1    9.65    0.40
  -2   4   1   12.33    0.63
  -2  -4   1   12.21    0.48
   2   4  -1   12.42    0.65
  -2  -4   1   12.50    0.54
   1  -4  -1   10.79    0.56
  -1   4   1   10.45    0.58
   1   4  -1   10.79    0.60
  -1  -4   1   10.70    0.48
   1  -4  -1   11.12    0.61
  -1  -4   1   10.59    0.47
   0  -4  -1    5.04    0.40
   0  -4   1    4.91    0.35
   0  -4   1    4.84    0.32
   0   4  -1    5.22    0.43
   0   4   1    4.77    0.41
   0  -4  -1    4.69    0.38
   1   4   1    7.12    0.49
   1  -4   1    7.18    0.37
   1  -4   1    7.03    0.33
  -1  -4  -1    7.30    0.47
  -1   4  -1    6.79    0.49
  -1  -4  -1    7.04    0.47
   2  -4   1   22.97    0.60
  -2  -4  -1   22.15    0.79
   2   4   1   21.76    0.82
   2  -4   1   22.95    0.67
  -2   4  -1   22.06    0.86
  -2  -4  -1   22.52    0.82
  -3   4  -1   16.07    0.75
  -3  -4  -1   15.77    0.66
   3   4   1   16.75    0.71
  -3  -4  -1   16.70    0.72
   3  -4   1   16.74    0.53
   4  -4   1    2.83    0.24
  -4   4  -1    2.26    0.32
   4   4   1    2.24    0.29
  -4  -4  -1    2.58    0.31
  -4  -4  -1    2.71    0.29
   5   4   1    9.47    0.56
  -5  -4  -1    9.03    0.57
  -5  -4  -1    8.37    0.30
   5  -4   1    9.37    0.43
  -5  -4  -1    9.24    0.50
   6  -4   1   16.27    0.60
  -6  -4  -1   15.82    0.34
  -6  -4  -1   16.34    0.79
   6   4   1   16.13    0.72
   6   4   1   15.25    0.78
  -6  -4  -1   16.70    0.69
   7   4   1    3.19    0.34
  -7  -4  -1    3.21    0.33
  -7  -4  -1    4.10    0.45
  -7  -4  -1    3.00    0.13
  -8  -4  -1    4.64    0.40
   8   4   1    5.07    0.43
  -8  -4  -1    5.31    0.50
   8  -4   1    4.94    0.36
   9   4   1    6.44    0.48
  -9  -4  -1    6.21    0.48
  -9  -4  -1    5.88    0.53
  10  -4   1    3.49    0.46
 -10  -4  -1    3.48    0.40
  10   4   1    3.88    0.40
 -10  -4  -1    3.55    0.46
 -10   4  -1    3.79    0.38
 -11   4  -1    3.50    0.40
 -11  -4  -1    3.69    0.47
 -11  -4  -1    3.43    0.41
  11  -4   1    3.76    0.48
  11   4   1    3.23    0.37
 -12  -4  -1    0.06    0.23
  12   4   1    0.34    0.21
  12  -4   1    0.20    0.24
 -12   4  -1    0.38    0.21
  13  -4   1   -0.12    0.32
 -13  -4  -1    0.09    0.26
 -13   4  -1    0.40    0.23
  13   4   1    0.45    0.20
  14   4   1    0.43    0.21
  14  -4   1    0.23    0.31
 -14  -4  -1    0.24    0.30
 -14   4  -1   -0.02    0.20
  15   4   1    0.83    0.27
 -15   4  -1    0.46    0.26
 -15  -4  -1    0.72    0.31
  15  -4   1    0.21    0.34
 -16   4  -1    0.44    0.27
 -16  -4  -1    0.47    0.31
  16  -4   1    0.27    0.30
  16   4   1    0.60    0.24
  17  -4   1   -0.03    0.25
 -17   4  -1   -0.07    0.25
  18  -4   1    0.22    0.35
 -18   4  -1    0.39    0.29
 -18  -4  -1    0.55    0.36
 -19   4  -1   -0.37    0.32
 -20   4  -1    0.73    0.37
 -18  -5   1    0.23    0.33
  17   5  -1    0.63    0.32
 -17  -5   1    0.18    0.29
  16  -5  -1    0.89    0.43
 -16  -5   1    0.21    0.32
  16   5  -1    0.22    0.28
  15  -5  -1    2.31    0.51
  15   5  -1    2.53    0.42
 -15  -5   1    1.96    0.44
  14  -5  -1    0.16    0.22
  14   5  -1    0.43    0.25
 -14  -5   1    0.45    0.31
 -13  -5   1    0.98    0.34
  13   5  -1    0.36    0.27
  13  -5  -1    0.42    0.32
  12  -5  -1    0.74    0.32
  12   5  -1    1.07    0.29
 -12  -5   1    0.55    0.29
 -11  -5   1    5.32    0.55
  11   5  -1    4.74    0.51
  11  -5  -1    4.39    0.55
  10  -5  -1    0.00    0.27
 -10  -5   1    0.00    0.20
  10   5  -1    0.05    0.20
   9   5  -1   -0.12    0.23
  -9  -5   1    0.15    0.14
  -9  -5   1   -0.02    0.18
   9  -5  -1   -0.09    0.24
   8  -5  -1    4.32    0.49
   8   5  -1    4.39    0.48
  -8  -5   1    4.14    0.33
  -8  -5   1    3.92    0.43
  -7  -5   1   -0.08    0.17
   7   5  -1    0.00    0.21
  -7  -5   1    0.02    0.10
   7  -5  -1    0.11    0.19
  -6  -5   1    1.34    0.19
   6   5  -1    1.16    0.29
   6  -5  -1    0.86    0.26
  -6  -5   1    1.06    0.24
   5  -5  -1    0.61    0.23
  -5  -5   1    0.72    0.20
  -5  -5   1    0.80    0.16
   5   5  -1    0.94    0.26
  -4  -5   1    0.24    0.11
   4   5  -1    0.33    0.21
   4  -5  -1    0.04    0.16
  -4  -5   1    0.10    0.14
  -3  -5   1    0.25    0.12
  -3  -5   1    0.24    0.15
   3  -5  -1    0.12    0.14
   3   5  -1   -0.09    0.18
   3  -5  -1   -0.23    0.20
   2  -5  -1    3.13    0.39
   2  -5  -1    3.54    0.36
   2   5  -1    3.82    0.44
  -2  -5   1    3.46    0.32
  -2   5   1    3.28    0.40
  -2  -5   1    3.43    0.29
  -1  -5   1    0.20    0.11
   1  -5  -1   -0.06    0.17
   1   5  -1    0.32    0.23
  -1   5   1    0.25    0.20
   1  -5  -1    0.09    0.16
  -1  -5   1    0.19    0.13
   0  -5  -1    7.96    0.56
   0  -5  -1    8.30    0.54
   0  -5   1    6.87    0.46
   0  -5   1    7.53    0.43
   0  -5   1    7.19    0.40
   0   5  -1    7.80    0.60
   0   5   1    8.77    0.61
   1  -5   1    3.48    0.29
  -1  -5  -1    2.94    0.35
   1   5   1    3.11    0.39
  -1   5  -1    3.82    0.43
  -1  -5  -1    2.76    0.33
   1  -5   1    3.09    0.29
   1  -5   1    3.06    0.34
  -2  -5  -1    0.04    0.15
   2  -5   1    0.02    0.12
  -2   5  -1   -0.09    0.22
   2   5   1    0.06    0.20
  -2  -5  -1    0.08    0.13
  -3   5  -1    6.89    0.58
   3   5   1    6.35    0.53
  -3  -5  -1    7.55    0.49
   3  -5   1    6.99    0.43
  -3  -5  -1    7.36    0.53
  -4  -5  -1    7.01    0.48
  -4  -5  -1    6.68    0.52
   4   5   1    6.28    0.52
   5   5   1    8.96    0.62
  -5  -5  -1    8.10    0.60
  -5  -5  -1    7.78    0.51
  -6  -5  -1    8.24    0.61
   6   5   1    7.30    0.57
  -6  -5  -1    7.69    0.51
   7   5   1    7.64    0.59
  -7  -5  -1    8.25    0.64
  -7  -5  -1    7.20    0.50
  -8  -5  -1    5.15    0.53
   8   5   1    5.57    0.51
  -8  -5  -1    5.26    0.45
   9  -5   1    0.18    0.22
  -9  -5  -1    0.35    0.22
  -9  -5  -1    0.05    0.23
   9   5   1   -0.16    0.24
 -10  -5  -1    1.56    0.35
 -10  -5  -1    1.66    0.30
  10  -5   1    2.41    0.45
  10   5   1    2.48    0.37
  11   5   1    5.97    0.54
 -11  -5  -1    6.18    0.63
  11  -5   1    5.89    0.66
 -11  -5  -1    5.63    0.50
  12   5   1    2.87    0.40
  12  -5   1    3.17    0.53
 -12  -5  -1    2.31    0.44
 -13  -5  -1    1.06    0.36
  13   5   1    0.95    0.28
  13  -5   1    0.15    0.30
  14   5   1    0.45    0.23
  14  -5   1    0.63    0.35
 -14  -5  -1    0.81    0.36
  15  -5   1    2.12    0.50
  15   5   1    1.94    0.37
 -15  -5  -1    1.96    0.45
 -16  -5  -1    0.96    0.42
 -17  -5  -1    1.80    0.49
 -16  -6   1    0.32    0.34
  16   6  -1    0.04    0.27
  15   6  -1    0.08    0.28
 -15  -6   1    0.58    0.36
  14   6  -1    0.99    0.37
 -14  -6   1    0.83    0.34
  14  -6  -1    1.16    0.45
 -13  -6   1    1.32    0.36
  13   6  -1    0.73    0.32
  13  -6  -1    1.37    0.40
 -12  -6   1    2.96    0.48
  12   6  -1    2.98    0.48
  12  -6  -1    2.53    0.50
  11  -6  -1    0.88    0.33
  11   6  -1    1.62    0.41
 -11  -6   1    1.37    0.33
  10   6  -1    1.12    0.34
 -10  -6   1    0.94    0.31
  10  -6  -1    0.98    0.36
   9  -6  -1   -0.18    0.31
   9   6  -1   -0.10    0.26
  -9  -6   1   -0.13    0.22
  -8  -6   1    0.59    0.23
   8   6  -1    0.45    0.26
   8  -6  -1    0.46    0.29
   7   6  -1    2.06    0.42
   7  -6  -1    2.28    0.41
  -7  -6   1    2.24    0.37
  -6  -6   1    7.81    0.58
   6   6  -1    7.88    0.70
   6  -6  -1    7.51    0.66
   5   6  -1    8.63    0.72
   5  -6  -1    9.10    0.70
  -5  -6   1    7.64    0.56
   4   6  -1    8.40    0.71
   4  -6  -1    7.53    0.66
   4  -6  -1    8.32    0.65
   3  -6  -1    4.81    0.49
   3  -6  -1    4.64    0.53
   3   6  -1    6.07    0.60
   3  -6  -1    4.87    0.45
   2  -6  -1    9.85    0.63
   2  -6  -1   11.46    0.70
   2  -6  -1   11.11    0.75
   2   6  -1   10.29    0.78
   1   6  -1    1.47    0.36
  -1   6   1    1.86    0.37
   1  -6  -1    1.23    0.26
   1  -6  -1    1.21    0.29
   1  -6  -1    1.50    0.29
   0   6   1    2.39    0.41
   0  -6  -1    1.86    0.30
   0   6  -1    2.02    0.41
   0  -6  -1    2.10    0.32
   0  -6  -1    2.17    0.30
  -1  -6  -1    9.34    0.56
  -1   6  -1    9.18    0.73
  -1  -6  -1    8.84    0.61
   1   6   1    9.63    0.72
  -2  -6  -1   13.41    0.77
   2   6   1   13.71    0.86
  -2   6  -1   13.87    0.89
  -3   6  -1    0.16    0.26
  -3  -6  -1    0.18    0.20
   3   6   1   -0.18    0.25
  -4  -6  -1    1.11    0.30
   4   6   1    0.90    0.28
  -5  -6  -1    0.69    0.27
   5   6   1    0.40    0.28
   6   6   1    2.94    0.44
  -6  -6  -1    3.40    0.45
  -7  -6  -1    1.12    0.31
   7  -6   1    0.54    0.28
   7   6   1    0.71    0.29
   8  -6   1    0.27    0.30
  -8  -6  -1    0.23    0.25
  -9  -6  -1    0.62    0.29
   9  -6   1   -0.16    0.35
   9   6   1    0.88    0.31
  10  -6   1    0.76    0.35
  10   6   1    0.54    0.27
 -10  -6  -1   -0.03    0.28
  11  -6   1    0.01    0.33
  11   6   1    0.13    0.27
 -11  -6  -1   -0.10    0.26
  12  -6   1    0.12    0.30
  12   6   1    0.15    0.26
 -12  -6  -1    0.01    0.27
 -13  -6  -1    0.50    0.37
  13   6   1    0.26    0.28
  13  -6   1    0.10    0.38
 -14  -6  -1    0.46    0.35
 -15  -6  -1    0.27    0.32
  12   7  -1   -0.06    0.28
  11   7  -1    0.13    0.30
  10  -7  -1    0.36    0.35
  10   7  -1   -0.12    0.34
   9  -7  -1    0.07    0.29
   9   7  -1    0.16    0.31
   8  -7  -1    0.29    0.30
   8   7  -1   -0.26    0.28
   7  -7  -1    0.06    0.26
   7   7  -1    0.07    0.29
   6  -7  -1   -0.25    0.27
   6   7  -1   -0.33    0.34
   5   7  -1   -0.27    0.34
   5  -7  -1   -0.58    0.31
   4  -7  -1   -0.07    0.24
   4   7  -1    0.37    0.30
   3   7  -1    0.67    0.38
   2   7  -1   -0.14    0.33
   1   7  -1    0.20    0.29
   0   7   1    0.40    0.32
   0   7  -1    0.56    0.35
  -1   7  -1    0.64    0.37
   1   7   1    0.59    0.32
   2   7   1    0.40    0.28
   3   7   1    0.62    0.33
   3  -7   1    0.49    0.29
   4  -7   1    1.21    0.32
   4   7   1    1.72    0.43
   5  -7   1    2.99    0.51
   5   7   1    2.54    0.47
   6   7   1    0.73    0.33
   6  -7   1    0.51    0.29
   7  -7   1    0.78    0.35
   7   7   1    0.62    0.33
   8  -7   1    0.08    0.30
   8   7   1    0.29    0.27
   9  -7   1    0.93    0.42
   9   7   1    1.12    0.38
  10   7   1    1.53    0.42
  11   7   1    0.11    0.28
  25   0  -2    0.69    0.35
  24   0  -2    0.95    0.35
  23   0  -2    0.72    0.30
 -23   0   2    0.24    0.30
 -22   0   2    3.04    0.53
  22   0  -2    3.23    0.48
  21   0  -2    1.61    0.38
 -21   0   2    2.03    0.45
  20   0  -2    2.63    0.43
 -20   0   2    2.16    0.41
  19   0  -2    0.83    0.27
 -19   0   2    1.32    0.30
  18   0  -2    0.17    0.18
 -18   0   2    0.29    0.22
 -17   0   2   24.43    1.07
  17   0  -2   23.07    0.98
  16   0  -2    8.23    0.58
 -16   0   2    7.85    0.60
 -15   0   2    7.14    0.54
  15   0  -2    6.89    0.51
  14   0  -2   13.54    0.68
 -14   0   2   13.06    0.69
 -13   0   2    9.22    0.55
  13   0  -2    9.53    0.53
 -12   0   2    3.74    0.35
  12   0  -2    4.13    0.36
 -11   0   2   50.17    1.15
  11   0  -2   51.57    1.13
 -10   0   2  257.93    2.46
 -10   0   2  261.06    2.52
  10   0  -2  261.27    2.38
  -9   0   2   60.89    1.13
  -9   0   2   60.38    1.15
   9   0  -2   60.55    1.23
   9   0  -2   60.19    1.09
   8   0  -2  201.99    2.08
  -8   0   2  205.39    1.93
   8   0  -2  194.12    1.85
  -8   0   2  198.97    1.94
  -7   0   2   36.69    0.78
  -7   0   2   37.36    0.77
   7   0  -2   36.52    0.75
   7   0  -2   36.49    0.83
   6   0  -2  124.41    1.28
  -6   0   2  126.55    1.33
   6   0  -2  122.37    1.36
  -6   0   2  124.55    1.30
   5   0  -2  813.66    3.01
  -5   0   2  824.37    3.06
   5   0  -2  819.59    3.09
  -5   0   2  816.79    3.09
  -4   0   2  602.82    2.39
  -4   0   2  591.88    2.36
   4   0  -2  593.32    2.37
   3   0  -2  194.22    1.19
   3   0  -2  192.03    1.20
  -3   0   2  195.81    1.20
  -3   0   2  197.13    1.21
   1   0   2   80.22    0.88
   1   0   2   79.79    0.80
  -2   0  -2   52.68    0.74
  -2   0  -2   53.92    0.78
   2   0   2   54.76    0.75
   2   0   2   53.74    0.79
  -3   0  -2    4.42    0.24
   3   0   2    4.20    0.25
   3   0   2    4.64    0.25
  -3   0  -2    4.50    0.25
  -4   0  -2    7.83    0.36
   4   0   2    7.34    0.35
   4   0   2    7.39    0.34
  -4   0  -2    7.38    0.34
   5   0   2   14.76    0.54
  -5   0  -2   15.50    0.55
  -5   0  -2   14.75    0.52
   5   0   2   15.17    0.53
  -6   0  -2   43.65    1.00
  -6   0  -2   41.44    0.92
   6   0   2   43.17    0.96
   6   0   2   43.31    0.98
  -7   0  -2   14.05    0.58
   7   0   2   12.93    0.57
   7   0   2   12.87    0.58
  -8   0  -2    2.43    0.27
   8   0   2    2.34    0.23
   8   0   2    2.53    0.28
   9   0   2    1.19    0.18
  -9   0  -2    1.60    0.25
 -10   0  -2   11.96    0.63
  10   0   2   12.28    0.56
 -11   0  -2    4.58    0.43
  11   0   2    4.05    0.34
 -12   0  -2    1.63    0.30
  12   0   2    1.27    0.22
 -13   0  -2   12.65    0.75
  13   0   2   13.73    0.69
  14   0   2    9.56    0.61
 -14   0  -2    9.71    0.69
 -15   0  -2   11.77    0.76
  15   0   2   12.07    0.69
 -16   0  -2    1.69    0.36
  16   0   2    2.14    0.35
 -17   0  -2    6.14    0.63
  17   0   2    4.86    0.48
  18   0   2   -0.15    0.24
 -19   0  -2    2.79    0.47
  19   0   2    2.85    0.42
 -20   0  -2    1.59    0.41
  20   0   2    2.12    0.40
  21   0   2    2.12    0.41
 -21   0  -2    1.65    0.43
  22   0   2    1.48    0.40
  24  -1  -2    0.59    0.34
  23  -1  -2    0.63    0.33
  23   1  -2    0.34    0.27
  22   1  -2    2.98    0.45
 -22  -1   2    2.48    0.50
  22  -1  -2    2.77    0.49
 -22   1   2    2.64    0.48
 -21   1   2    2.04    0.43
 -21  -1   2    2.38    0.46
  21  -1  -2    2.17    0.42
  21   1  -2    2.05    0.37
 -20   1   2   -0.17    0.31
 -20  -1   2    0.24    0.26
  20  -1  -2    0.03    0.22
  20   1  -2    0.45    0.24
  19   1  -2    0.58    0.24
 -19   1   2    0.57    0.28
  19  -1  -2    0.78    0.30
 -19  -1   2    0.77    0.29
 -18  -1   2    5.28    0.54
  18  -1  -2    5.26    0.52
  18   1  -2    6.15    0.50
 -18   1   2    5.43    0.55
 -17  -1   2    6.01    0.55
  17   1  -2    5.58    0.47
  17  -1  -2    5.70    0.53
 -17   1   2    5.57    0.55
 -16   1   2    1.45    0.30
 -16  -1   2    1.59    0.31
  16  -1  -2    1.04    0.25
  16   1  -2    1.93    0.28
  15  -1  -2    3.20    0.39
 -15  -1   2    2.36    0.34
  15   1  -2    2.88    0.32
 -15   1   2    2.50    0.35
  14  -1  -2    3.60    0.39
  14   1  -2    4.33    0.36
 -14   1   2    3.57    0.39
  13   1  -2    8.47    0.47
  13  -1  -2    8.10    0.54
 -13  -1   2    9.49    0.60
 -13   1   2    8.63    0.56
 -12  -1   2    2.69    0.32
 -12   1   2    2.59    0.31
  12   1  -2    2.40    0.26
  12  -1  -2    1.86    0.27
  11  -1  -2    5.44    0.41
 -11   1   2    5.93    0.43
 -11  -1   2    6.17    0.44
  11   1  -2    5.72    0.35
 -11  -1   2    5.77    0.37
  10   1  -2    0.50    0.14
 -10   1   2    0.23    0.13
 -10  -1   2    0.43    0.12
  10   1  -2    0.41    0.13
  10  -1  -2    0.30    0.14
 -10  -1   2    0.36    0.16
  -9  -1   2    7.70    0.43
   9  -1  -2    7.42    0.43
   9   1  -2    7.73    0.37
  -9  -1   2    7.65    0.38
  -9   1   2    7.78    0.43
   9   1  -2    7.64    0.46
  -9   1   2    7.80    0.45
   9   1  -2    6.62    0.42
   9  -1  -2    8.15    0.46
   8  -1  -2    2.30    0.23
  -8   1   2    1.83    0.22
   8   1  -2    1.90    0.23
  -8  -1   2    2.20    0.24
  -8  -1   2    1.88    0.17
   8   1  -2    2.01    0.18
  -8   1   2    1.65    0.20
   8   1  -2    2.14    0.22
   8  -1  -2    2.15    0.24
   7   1  -2   62.23    0.90
   7  -1  -2   63.28    1.11
   7   1  -2   63.16    1.14
  -7  -1   2   62.48    0.92
   7  -1  -2   65.19    1.08
  -7   1   2   63.70    1.06
  -7   1   2   63.30    1.16
  -7  -1   2   64.56    1.08
   7   1  -2   65.38    1.03
   6  -1  -2    1.71    0.19
   6  -1  -2    1.55    0.17
  -6  -1   2    1.50    0.14
   6   1  -2    1.88    0.16
   6   1  -2    1.25    0.16
  -6   1   2    1.50    0.16
  -6   1   2    1.61    0.18
  -6  -1   2    1.51    0.17
   5   1  -2   31.81    0.59
  -5   1   2   29.96    0.66
  -5  -1   2   31.54    0.57
   5  -1  -2   31.53    0.68
  -5   1   2   31.29    0.71
   5   1  -2   31.40    0.66
   5  -1  -2   32.66    0.68
  -5  -1   2   30.70    0.63
  -4   1   2  100.74    1.13
   4   1  -2  101.54    1.04
   4  -1  -2  100.67    1.13
  -4   1   2   99.08    1.17
   4   1  -2  103.21    1.06
  -4  -1   2   99.16    0.99
  -4  -1   2  102.96    1.00
   4  -1  -2  102.53    1.12
   3  -1  -2   18.13    0.45
   3  -1  -2   17.77    0.43
   3   1  -2   17.29    0.42
  -3  -1   2   17.82    0.36
  -3   1   2   17.62    0.45
   3   1  -2   18.81    0.39
  -3  -1   2   17.28    0.41
   2   1  -2    0.84    0.07
   2   1  -2    0.76    0.09
  -2   1   2    0.72    0.09
  -2  -1   2    0.64    0.06
  -2  -1   2    0.75    0.09
   2  -1  -2    0.66    0.08
  -1   1   2   93.93    0.76
  -1  -1   2   90.62    0.88
   1   1  -2   88.85    0.91
   1  -1  -2   87.59    0.71
   1  -1  -2   91.53    0.80
   0  -1  -2  346.87    1.12
   0   1  -2  342.76    1.77
   0  -1  -2  334.03    2.22
   0  -1   2  352.53    1.26
   0  -1   2  341.25    1.74
   0   1   2  350.95    1.22
   0   1   2  346.62    1.42
   0  -1  -2  350.24    1.47
   1   1   2  194.70    1.73
  -1   1  -2  198.73    1.37
  -1  -1  -2  197.20    1.71
  -1  -1  -2  197.95    1.64
   1  -1   2  191.92    1.36
  -1  -1  -2  199.63    1.02
   1   1   2  190.84    1.63
   1  -1   2  197.44    1.20
   1   1   2  199.90    1.03
  -2   1  -2   86.33    0.71
   2  -1   2   85.41    0.73
   2   1   2   82.65    1.16
  -2  -1  -2   84.98    0.65
   2  -1   2   84.30    0.92
   2   1   2   85.07    0.66
  -2  -1  -2   79.84    1.10
   2  -1   2   83.25    0.92
  -2  -1  -2   83.72    1.13
   2   1   2   83.22    1.14
  -2   1  -2   85.48    0.92
   3  -1   2  204.67    1.50
   3   1   2  201.13    1.06
  -3  -1  -2  198.47    1.81
   3  -1   2  204.72    1.38
   3  -1   2  203.32    1.64
   3   1   2  205.47    1.90
  -3   1  -2  202.68    1.33
   3   1   2  201.96    1.89
  -3  -1  -2  203.28    1.87
  -4   1  -2  133.50    1.25
   4   1   2  132.03    0.83
   4   1   2  132.22    0.90
   4  -1   2  136.53    1.47
  -4  -1  -2  137.78    1.57
   4  -1   2  133.94    1.27
   4  -1   2  133.81    1.28
   4   1   2  133.96    1.63
  -4  -1  -2  137.21    1.65
   4   1   2  131.02    1.63
   5   1   2  141.64    1.04
   5  -1   2  147.28    1.39
  -5  -1  -2  145.56    1.72
  -5   1  -2  140.32    1.43
   5   1   2  142.59    1.77
   5   1   2  144.56    1.82
  -5  -1  -2  147.45    1.81
   5  -1   2  149.61    1.51
   5  -1   2  146.95    1.68
  -6  -1  -2  215.46    2.21
   6   1   2  207.86    2.28
   6  -1   2  197.61    2.15
   6   1   2  212.60    2.34
  -6  -1  -2  206.09    2.27
  -6   1  -2  208.81    1.88
   6   1   2  209.38    1.41
   6  -1   2  204.01    1.95
   7  -1   2   69.78    1.23
   7   1   2   69.83    1.43
   7  -1   2   70.42    1.35
   7   1   2   74.03    0.93
   7   1   2   69.03    1.39
  -7   1  -2   72.06    1.18
  -7  -1  -2   72.51    1.36
  -7  -1  -2   70.86    1.39
   8   1   2   65.29    0.97
  -8  -1  -2   62.16    1.36
  -8  -1  -2   63.45    1.34
   8  -1   2   62.75    1.27
  -8   1  -2   63.45    1.19
  -9   1  -2   55.83    1.19
  -9  -1  -2   55.21    1.34
   9   1   2   55.97    0.97
  -9  -1  -2   57.82    1.35
 -10  -1  -2   29.68    1.02
  10   1   2   29.45    0.75
 -10   1  -2   28.77    0.91
  10  -1   2   29.64    0.97
  11   1   2   22.63    0.70
 -11  -1  -2   22.55    0.94
 -11   1  -2   23.98    0.86
  11  -1   2   22.34    0.89
  12  -1   2   25.85    0.98
  12   1   2   26.06    0.80
 -12  -1  -2   25.91    1.04
 -13  -1  -2   39.47    1.33
  13   1   2   40.62    1.03
  13  -1   2   40.19    1.28
  14   1   2    6.58    0.45
  14  -1   2    6.73    0.55
 -14   1  -2    6.49    0.55
 -14  -1  -2    6.84    0.61
  15   1   2   10.14    0.59
 -15  -1  -2   11.81    0.81
 -15   1  -2    8.76    0.65
  15  -1   2   10.25    0.69
 -16  -1  -2    2.16    0.43
  16  -1   2    2.16    0.39
 -16   1  -2    1.57    0.33
  16   1   2    2.05    0.30
  17  -1   2    0.02    0.20
 -17   1  -2   -0.49    0.29
  17   1   2   -0.06    0.18
 -17  -1  -2    0.33    0.31
  18   1   2    0.44    0.22
 -18   1  -2    0.60    0.31
  18  -1   2    0.24    0.25
 -18  -1  -2   -0.13    0.25
  19   1   2    0.22    0.21
  19  -1   2    0.18    0.24
 -19  -1  -2    0.61    0.34
 -19   1  -2    0.22    0.25
  20  -1   2   -0.23    0.26
 -20   1  -2   -0.09    0.29
  21  -1   2   -0.25    0.30
 -21   1  -2    0.36    0.33
  22  -1   2    0.21    0.25
  23  -1   2    0.19    0.26
 -22   2   2   -0.08    0.27
 -22  -2   2    0.62    0.37
  22  -2  -2    0.30    0.27
  21  -2  -2    0.19    0.27
 -21   2   2    0.19    0.30
 -21  -2   2    0.11    0.26
 -20  -2   2    0.17    0.29
  20  -2  -2   -0.25    0.29
 -20   2   2    0.19    0.24
  20   2  -2    0.00    0.17
 -19  -2   2    0.08    0.27
  19   2  -2    0.14    0.18
  19  -2  -2   -0.13    0.25
 -19   2   2    0.06    0.26
  18   2  -2    5.19    0.45
  18  -2  -2    3.98    0.53
 -18   2   2    5.09    0.55
  17   2  -2   10.08    0.58
 -17  -2   2   10.39    0.76
 -17   2   2    9.73    0.72
  17  -2  -2    9.00    0.70
 -16   2   2   -0.04    0.22
  16  -2  -2    0.69    0.30
  16   2  -2    0.10    0.15
 -16  -2   2    0.74    0.31
  15   2  -2   10.67    0.54
  15  -2  -2   10.88    0.73
 -15   2   2   10.86    0.69
 -15  -2   2    9.87    0.68
 -14  -2   2    6.26    0.53
 -14   2   2    5.34    0.48
  14  -2  -2    5.50    0.51
  14   2  -2    5.32    0.38
  13   2  -2   17.50    0.64
 -13   2   2   18.24    0.82
 -13  -2   2   16.61    0.68
  13  -2  -2   19.42    0.88
 -13  -2   2   16.60    0.81
 -12  -2   2   43.21    1.24
  12  -2  -2   43.69    1.28
 -12   2   2   43.10    1.20
  12   2  -2   43.16    0.96
 -12  -2   2   43.28    1.01
  11  -2  -2   31.72    1.06
 -11  -2   2   30.48    1.00
 -11   2   2   32.66    0.99
  11   2  -2   31.68    0.80
 -11  -2   2   31.96    0.82
 -10  -2   2   29.26    0.93
  10  -2  -2   28.50    0.96
  10   2  -2   30.14    0.76
  10   2  -2   30.11    0.85
 -10  -2   2   28.08    0.72
  10   2  -2   30.27    0.89
 -10   2   2   29.20    0.90
  -9  -2   2   51.30    0.91
  -9  -2   2   49.76    1.14
   9   2  -2   50.99    1.09
   9  -2  -2   51.87    1.22
   9   2  -2   52.31    1.07
  -9   2   2   49.71    1.14
   9   2  -2   51.15    0.95
   8   2  -2   89.61    1.35
   8   2  -2   82.74    1.20
  -8  -2   2   85.12    1.41
   8   2  -2   86.92    1.32
  -8  -2   2   87.30    1.12
   8  -2  -2   86.18    1.40
   8  -2  -2   86.32    1.54
   8   2  -2   86.13    1.54
  -8   2   2   86.69    1.44
  -7   2   2  124.47    1.66
   7   2  -2  129.71    1.48
   7   2  -2  129.62    1.59
   7  -2  -2  126.36    1.75
   7  -2  -2  125.36    1.63
  -7  -2   2  128.52    1.62
  -7  -2   2  126.02    1.30
   7   2  -2  126.74    1.76
   6  -2  -2   18.18    0.59
  -6  -2   2   17.51    0.57
   6   2  -2   17.96    0.50
   6  -2  -2   19.11    0.65
  -6  -2   2   18.36    0.50
   6   2  -2   17.48    0.61
  -6   2   2   19.15    0.62
   6   2  -2   19.28    0.61
   5   2  -2  130.22    1.17
   5   2  -2  130.22    1.52
   5   2  -2  129.66    1.54
   5  -2  -2  132.89    1.63
  -5  -2   2  126.96    1.40
   5  -2  -2  130.34    1.51
  -5  -2   2  125.93    1.30
   4   2  -2   73.12    1.04
   4   2  -2   73.99    0.78
  -4  -2   2   72.79    0.97
   4  -2  -2   74.92    1.16
  -4  -2   2   74.23    1.05
   4  -2  -2   74.26    1.11
   4   2  -2   72.70    1.13
   4  -2  -2   70.73    1.14
  -3  -2   2   72.24    0.86
  -3  -2   2   70.19    0.53
   3  -2  -2   72.78    1.08
   3   2  -2   73.53    0.92
   3  -2  -2   73.75    1.05
  -3  -2   2   74.46    1.06
   3   2  -2   73.77    1.12
   3   2  -2   72.97    0.64
  -2  -2   2   70.23    0.74
   2  -2  -2   67.91    0.94
   2   2  -2   67.81    1.09
  -2  -2   2   69.63    1.04
   2  -2  -2   69.42    1.03
   2   2  -2   69.84    0.78
  -1  -2   2   39.39    0.47
   1  -2  -2   37.95    0.74
  -1  -2   2   39.57    0.79
   1   2  -2   39.05    0.82
  -1   2   2   39.15    0.73
   1  -2  -2   38.48    0.65
   0   2   2   13.29    0.43
   0  -2  -2   13.51    0.54
   0  -2  -2   13.65    0.44
   0  -2  -2   12.99    0.51
   0   2  -2   13.11    0.48
   0  -2   2   13.52    0.47
   0  -2   2   13.06    0.22
   0  -2  -2   13.71    0.33
   0  -2   2   13.33    0.25
  -1  -2  -2    2.47    0.18
  -1  -2  -2    2.17    0.22
   1  -2   2    2.45    0.11
   1  -2   2    2.26    0.21
  -1  -2  -2    2.25    0.12
   1   2   2    2.65    0.25
  -1  -2  -2    2.58    0.24
  -1   2  -2    1.99    0.20
   1   2   2    2.28    0.18
   2  -2   2   82.75    1.22
   2   2   2   83.34    1.41
   2   2   2   84.36    1.04
  -2  -2  -2   80.58    0.99
  -2  -2  -2   82.38    1.30
  -2   2  -2   81.04    1.21
  -2   2  -2   84.40    0.80
  -2  -2  -2   82.24    1.32
   2   2   2   81.73    1.34
   3   2   2    7.28    0.31
  -3  -2  -2    7.33    0.29
  -3   2  -2    7.15    0.37
  -3   2  -2    7.57    0.27
  -3  -2  -2    7.18    0.40
   3  -2   2    7.21    0.37
   3   2   2    7.83    0.44
   3  -2   2    7.36    0.25
  -3  -2  -2    7.72    0.43
   3   2   2    7.40    0.43
  -4   2  -2   48.82    0.79
   4   2   2   50.63    0.82
   4   2   2   52.94    1.16
  -4  -2  -2   50.66    1.05
  -4  -2  -2   51.92    0.76
  -4  -2  -2   50.60    1.12
   4  -2   2   50.46    1.00
   4  -2   2   49.58    0.75
   4   2   2   49.68    1.15
   5   2   2   -0.02    0.10
  -5  -2  -2    0.09    0.12
   5  -2   2    0.09    0.08
   5  -2   2    0.01    0.07
   5   2   2    0.00    0.10
   5   2   2    0.08    0.07
  -5   2  -2    0.09    0.08
  -5  -2  -2    0.02    0.11
   6   2   2   -0.06    0.11
  -6  -2  -2    0.04    0.12
  -6   2  -2    0.12    0.10
   6  -2   2   -0.02    0.09
   6   2   2   -0.13    0.09
  -6  -2  -2    0.01    0.11
   6  -2   2    0.03    0.07
  -7   2  -2    5.40    0.34
   7  -2   2    5.23    0.34
   7   2   2    5.21    0.28
   7   2   2    5.44    0.43
   7   2   2    5.51    0.18
  -7  -2  -2    6.10    0.42
  -7  -2  -2    5.37    0.44
   8  -2   2    0.99    0.18
  -8  -2  -2    0.69    0.19
   8   2   2    0.78    0.13
   8   2   2    0.89    0.10
  -8   2  -2    0.72    0.17
  -8  -2  -2    0.71    0.18
   9   2   2    4.33    0.21
  -9   2  -2    4.03    0.34
  -9  -2  -2    4.43    0.42
  -9  -2  -2    3.89    0.40
   9   2   2    4.65    0.29
 -10   2  -2   11.11    0.57
 -10  -2  -2   12.12    0.67
  10   2   2   11.30    0.46
  10   2   2   11.17    0.37
 -10  -2  -2   11.12    0.69
 -11  -2  -2    6.39    0.53
  11   2   2    7.65    0.40
 -11   2  -2    6.16    0.46
  11  -2   2    6.84    0.56
  11   2   2    6.94    0.32
 -11  -2  -2    8.12    0.61
  12   2   2    0.76    0.14
  12   2   2    0.95    0.18
 -12   2  -2    0.85    0.24
  12  -2   2    0.77    0.24
 -12  -2  -2    1.03    0.33
 -13  -2  -2   49.55    1.56
  13  -2   2   49.99    1.54
  13   2   2   49.05    1.04
  13   2   2   49.03    0.96
 -13   2  -2   49.43    1.38
 -14   2  -2    3.25    0.40
  14   2   2    3.80    0.33
  14  -2   2    2.62    0.41
  14   2   2    2.81    0.26
 -14  -2  -2    2.83    0.45
 -15   2  -2    0.16    0.22
  15  -2   2    0.06    0.24
 -15  -2  -2    0.47    0.32
  15   2   2    0.32    0.16
  15   2   2    0.57    0.18
  16  -2   2    0.21    0.25
 -16   2  -2    0.34    0.25
  16   2   2    0.31    0.15
  16   2   2    0.64    0.19
 -16  -2  -2    0.49    0.33
  17   2   2    5.98    0.44
 -17  -2  -2    6.88    0.72
  17  -2   2    5.86    0.62
 -17   2  -2    5.23    0.57
 -18   2  -2    3.87    0.52
  18  -2   2    3.42    0.51
 -18  -2  -2    4.69    0.63
  19  -2   2    1.02    0.37
 -19   2  -2    0.52    0.28
 -19  -2  -2    1.25    0.41
 -20   2  -2    2.48    0.46
 -20  -2  -2    3.16    0.56
  20  -2   2    2.83    0.50
  21  -2   2    1.15    0.37
 -21   2  -2    0.83    0.37
  22   3  -2    0.27    0.27
 -21  -3   2    2.10    0.45
 -21   3   2    1.63    0.47
  21  -3  -2    1.14    0.37
  21   3  -2    2.09    0.42
  20  -3  -2    0.13    0.30
 -20   3   2    0.50    0.30
  20   3  -2    1.21    0.34
 -20  -3   2    0.88    0.36
  19   3  -2    1.05    0.32
  19  -3  -2    0.05    0.24
 -19   3   2    0.75    0.33
 -19  -3   2    1.04    0.40
 -18   3   2    0.01    0.23
  18   3  -2    0.61    0.29
  18  -3  -2    1.10    0.39
 -18  -3   2    1.00    0.36
 -17   3   2    6.76    0.64
  17  -3  -2    6.89    0.68
  17   3  -2    7.89    0.61
 -17  -3   2    6.72    0.65
 -16   3   2    2.96    0.43
  16   3  -2    3.21    0.42
 -16  -3   2    3.49    0.47
  16  -3  -2    3.69    0.51
  16   3  -2    2.90    0.33
  15   3  -2   11.81    0.60
  15  -3  -2   11.14    0.81
 -15   3   2   11.14    0.75
 -15  -3   2   10.77    0.75
  15   3  -2   12.58    0.71
 -14   3   2    4.50    0.48
  14  -3  -2    4.63    0.51
  14   3  -2    5.44    0.48
 -14  -3   2    4.14    0.46
  13  -3  -2    3.72    0.45
  13   3  -2    4.23    0.42
 -13  -3   2    3.48    0.43
 -13  -3   2    3.39    0.31
 -13   3   2    3.82    0.43
  12  -3  -2    0.71    0.25
 -12  -3   2    1.28    0.30
 -12  -3   2    0.78    0.15
 -12   3   2    1.13    0.25
  12   3  -2    0.66    0.21
 -11   3   2    1.78    0.29
 -11  -3   2    1.76    0.20
  11  -3  -2    2.10    0.34
  11   3  -2    1.77    0.27
 -11  -3   2    1.99    0.32
  10   3  -2    0.91    0.20
 -10   3   2    0.78    0.19
 -10  -3   2    0.80    0.13
 -10  -3   2    0.71    0.21
  10  -3  -2    0.96    0.25
  10   3  -2    0.95    0.19
  -9  -3   2    0.19    0.16
   9   3  -2   -0.17    0.16
   9   3  -2    0.17    0.11
  -9  -3   2    0.16    0.09
   9  -3  -2    0.07    0.16
  -9   3   2    0.04    0.15
   8   3  -2    4.47    0.33
   8   3  -2    4.79    0.39
   8  -3  -2    4.71    0.41
  -8  -3   2    4.69    0.38
  -8  -3   2    5.08    0.29
  -7  -3   2    3.27    0.23
   7   3  -2    2.62    0.29
   7   3  -2    2.94    0.25
   7  -3  -2    3.09    0.33
   7   3  -2    2.55    0.29
  -7  -3   2    3.05    0.28
  -6  -3   2   13.34    0.48
  -6  -3   2   13.31    0.55
  -6  -3   2   13.43    0.41
   6  -3  -2   13.58    0.56
   6   3  -2   13.62    0.49
   6   3  -2   13.80    0.60
   6   3  -2   13.77    0.61
   6  -3  -2   14.51    0.63
  -5  -3   2   12.24    0.35
   5   3  -2   12.40    0.42
   5   3  -2   12.32    0.58
  -5  -3   2   10.97    0.44
   5   3  -2   12.09    0.53
   5  -3  -2   11.55    0.50
   5  -3  -2   11.70    0.55
  -5  -3   2   11.58    0.47
   4   3  -2   11.84    0.55
   4  -3  -2   11.87    0.54
  -4  -3   2   11.87    0.32
  -4  -3   2   10.93    0.44
   4   3  -2   11.30    0.48
   4  -3  -2   11.06    0.48
   3   3  -2    0.71    0.12
   3  -3  -2    0.60    0.14
  -3  -3   2    0.67    0.12
  -3  -3   2    0.74    0.08
   3   3  -2    0.68    0.17
   2  -3  -2    3.43    0.30
  -2  -3   2    3.05    0.17
  -2  -3   2    3.06    0.21
   2   3  -2    3.34    0.31
   2  -3  -2    2.80    0.23
  -2   3   2    3.86    0.32
   1  -3  -2   22.18    0.72
  -1   3   2   21.97    0.69
  -1  -3   2   21.16    0.49
  -1  -3   2   22.75    0.51
   1   3  -2   21.90    0.76
   1  -3  -2   21.58    0.79
   1  -3  -2   22.71    0.59
   0   3  -2   85.61    1.48
   0  -3  -2   81.26    1.51
   0  -3  -2   81.16    1.05
   0  -3   2   81.60    0.90
   0  -3  -2   82.53    1.34
   0   3   2   84.22    1.35
   0  -3  -2   83.21    1.46
   0  -3   2   81.73    0.80
   1  -3   2   44.54    0.60
   1   3   2   44.48    0.97
  -1  -3  -2   43.56    0.69
  -1   3  -2   43.57    1.06
  -1  -3  -2   41.47    1.08
  -1  -3  -2   44.18    1.07
   1  -3   2   44.29    0.65
  -1  -3  -2   43.52    0.96
  -2   3  -2   19.68    0.72
  -2  -3  -2   20.34    0.41
  -2  -3  -2   19.47    0.62
   2  -3   2   20.84    0.44
  -2  -3  -2   20.01    0.74
   2   3   2   19.78    0.65
  -2  -3  -2   19.35    0.72
  -3  -3  -2  102.78    1.70
  -3   3  -2  104.44    1.64
   3   3   2  101.03    1.45
   3   3   2  101.34    1.82
  -3  -3  -2   98.29    1.38
   3  -3   2  103.21    1.07
  -3  -3  -2  100.82    1.61
  -3  -3  -2  104.20    0.80
  -4  -3  -2  101.81    1.37
   4   3   2  101.65    1.86
  -4  -3  -2   98.51    1.60
  -4  -3  -2  102.49    1.78
  -4   3  -2  102.60    1.64
   4   3   2   99.37    1.45
  -5  -3  -2   14.76    0.52
   5   3   2   14.76    0.73
   5   3   2   14.65    0.57
  -5   3  -2   14.78    0.52
  -5  -3  -2   14.37    0.63
   5  -3   2   15.86    0.47
  -5  -3  -2   14.91    0.71
   6   3   2   24.90    0.74
  -6  -3  -2   25.93    0.86
  -6  -3  -2   26.12    0.97
   6   3   2   25.53    0.98
   6  -3   2   24.97    0.66
  -6   3  -2   25.96    0.73
   7   3   2   52.40    1.08
   7  -3   2   52.91    1.04
  -7   3  -2   54.43    1.11
  -7  -3  -2   52.61    1.27
  -7  -3  -2   52.55    1.41
   8   3   2   36.79    0.92
   8  -3   2   35.98    0.93
  -8   3  -2   36.82    0.95
  -8  -3  -2   37.32    1.23
  -8  -3  -2   36.97    1.10
  -9  -3  -2    6.39    0.48
   9   3   2    7.02    0.43
  -9   3  -2    5.93    0.41
  -9  -3  -2    6.25    0.54
  10   3   2   14.14    0.59
 -10  -3  -2   14.33    0.75
 -10  -3  -2   14.05    0.82
 -10   3  -2   14.30    0.66
 -11   3  -2    6.91    0.49
  11   3   2    6.49    0.42
 -11  -3  -2    7.17    0.62
 -11  -3  -2    6.53    0.56
  11  -3   2    6.18    0.57
 -12  -3  -2    3.48    0.47
 -12  -3  -2    4.13    0.47
  12   3   2    4.27    0.35
 -12   3  -2    4.22    0.42
  12  -3   2    4.60    0.54
  13   3   2    3.55    0.34
 -13  -3  -2    4.43    0.54
 -13   3  -2    3.99    0.42
  13  -3   2    4.58    0.54
 -14  -3  -2    5.22    0.60
  14   3   2    4.79    0.39
  14  -3   2    4.19    0.54
 -14   3  -2    4.86    0.49
 -15  -3  -2    0.90    0.36
  15   3   2    0.66    0.17
  15  -3   2    1.14    0.38
 -15   3  -2    0.82    0.27
 -16  -3  -2    2.35    0.49
 -16   3  -2    2.54    0.41
  16  -3   2    2.23    0.45
  16   3   2    2.14    0.29
  17  -3   2    0.86    0.37
 -17  -3  -2    0.91    0.39
 -17   3  -2    0.13    0.21
  18  -3   2    0.09    0.29
 -18   3  -2    0.31    0.29
 -18  -3  -2    0.70    0.39
 -19   3  -2   -0.15    0.24
 -19  -3  -2    0.37    0.34
 -20   3  -2   -0.49    0.34
 -21   4   2    0.30    0.28
 -21  -4   2    0.74    0.36
 -20   4   2   -0.25    0.33
 -20  -4   2    0.67    0.42
  20   4  -2   -0.17    0.29
  19   4  -2    0.04    0.24
 -19   4   2   -0.08    0.33
 -19  -4   2    0.15    0.26
 -18  -4   2    0.75    0.39
  18   4  -2   -0.23    0.29
 -18   4   2   -0.02    0.29
  18  -4  -2    0.73    0.33
 -17   4   2    0.69    0.31
  17   4  -2    1.26    0.32
 -17  -4   2    1.33    0.36
  17  -4  -2    1.39    0.45
  16  -4  -2    3.37    0.54
  16   4  -2    2.56    0.38
 -16   4   2    2.95    0.44
 -16  -4   2    3.40    0.50
  15   4  -2    0.45    0.24
 -15   4   2    1.11    0.30
  15  -4  -2    1.00    0.34
 -14  -4   2    2.86    0.43
  14   4  -2    1.64    0.31
  14  -4  -2    2.83    0.47
  13   4  -2    1.94    0.33
  13  -4  -2    1.63    0.38
 -13  -4   2    1.78    0.34
  12   4  -2    0.79    0.26
  12  -4  -2    0.53    0.26
 -12  -4   2    1.23    0.30
 -11  -4   2    6.74    0.55
  11   4  -2    8.11    0.59
  11  -4  -2    7.48    0.62
  10   4  -2    9.26    0.61
  10  -4  -2    9.38    0.68
  10   4  -2    8.07    0.54
 -10  -4   2    8.70    0.59
   9   4  -2    5.27    0.47
   9  -4  -2    4.86    0.50
   9   4  -2    4.59    0.39
  -9  -4   2    4.67    0.30
  -9  -4   2    5.02    0.43
   8   4  -2   16.26    0.79
  -8  -4   2   15.95    0.55
   8   4  -2   15.15    0.66
  -8  -4   2   14.80    0.70
   8  -4  -2   15.63    0.80
  -7  -4   2   15.03    0.49
  -7  -4   2   14.41    0.65
   7   4  -2   16.12    0.61
  -7  -4   2   14.54    0.54
   7  -4  -2   15.29    0.76
   7   4  -2   15.08    0.76
  -6  -4   2   24.67    0.72
   6  -4  -2   23.52    0.90
  -6  -4   2   24.91    0.58
  -6  -4   2   25.60    0.83
   6   4  -2   24.14    0.87
   6   4  -2   26.47    0.97
   5   4  -2   16.33    0.77
   5   4  -2   16.03    0.69
  -5  -4   2   15.86    0.62
   5  -4  -2   14.97    0.70
  -5  -4   2   15.25    0.43
  -4  -4   2   25.54    0.54
   4   4  -2   28.46    1.00
   4  -4  -2   26.35    0.88
  -4  -4   2   27.55    0.77
   3  -4  -2   17.80    0.68
  -3  -4   2   17.41    0.46
   3   4  -2   17.42    0.79
  -3  -4   2   18.51    0.60
   2  -4  -2    1.95    0.24
  -2   4   2    2.57    0.31
  -2  -4   2    1.86    0.17
   2  -4  -2    2.10    0.32
   2   4  -2    1.78    0.28
  -2  -4   2    2.16    0.22
   1  -4  -2    5.69    0.43
   1  -4  -2    4.66    0.43
  -1   4   2    5.24    0.41
   1  -4  -2    5.20    0.34
  -1  -4   2    4.96    0.30
  -1  -4   2    4.94    0.29
   1   4  -2    4.65    0.42
   0  -4   2   22.97    0.53
   0  -4  -2   21.96    0.88
   0   4   2   22.63    0.83
   0  -4   2   23.17    0.59
   0   4  -2   22.80    0.88
   0  -4  -2   22.29    0.65
   0  -4  -2   22.66    0.86
  -1   4  -2    2.55    0.32
  -1  -4  -2    2.48    0.32
  -1  -4  -2    2.14    0.29
   1  -4   2    2.47    0.18
   1   4   2    2.70    0.31
  -1  -4  -2    2.45    0.21
   1  -4   2    2.53    0.20
   2  -4   2    6.51    0.30
  -2   4  -2    6.01    0.47
  -2  -4  -2    6.70    0.47
   2  -4   2    6.13    0.31
   2   4   2    6.00    0.44
  -2  -4  -2    6.68    0.31
  -2  -4  -2    6.42    0.47
   3   4   2    7.06    0.47
  -3  -4  -2    7.16    0.48
  -3  -4  -2    7.56    0.52
   3  -4   2    7.60    0.32
  -3   4  -2    7.26    0.53
  -3  -4  -2    7.21    0.29
   4   4   2    0.61    0.18
  -4   4  -2    0.61    0.22
  -4  -4  -2    0.58    0.08
  -4  -4  -2    0.48    0.17
  -4  -4  -2    0.96    0.25
   4  -4   2    0.61    0.12
  -5  -4  -2    0.17    0.04
  -5  -4  -2    0.23    0.16
   5   4   2    0.29    0.16
  -5  -4  -2    0.21    0.13
   6   4   2    0.15    0.15
  -6  -4  -2    0.19    0.18
  -6  -4  -2    0.31    0.15
   6  -4   2    0.33    0.12
  -7  -4  -2    0.96    0.22
  -7  -4  -2    0.80    0.25
   7   4   2    0.82    0.20
   7  -4   2    0.86    0.17
  -8  -4  -2    0.27    0.23
   8   4   2    0.02    0.15
  -8  -4  -2   -0.10    0.15
   8  -4   2    0.03    0.11
  -9  -4  -2    3.15    0.39
   9   4   2    2.87    0.34
  -9   4  -2    3.26    0.35
  -9  -4  -2    3.20    0.44
 -10   4  -2    1.13    0.25
 -10  -4  -2    1.13    0.31
  10   4   2    1.50    0.27
 -10  -4  -2    1.53    0.30
  11   4   2    8.18    0.55
 -11  -4  -2    7.45    0.59
 -11   4  -2    8.11    0.57
 -11  -4  -2    8.63    0.69
  11  -4   2    8.99    0.75
  12   4   2    5.79    0.47
 -12  -4  -2    6.27    0.57
 -12   4  -2    5.40    0.50
 -12  -4  -2    5.62    0.60
  12  -4   2    6.60    0.68
 -13   4  -2    1.79    0.33
  13  -4   2    1.95    0.44
 -13  -4  -2    1.81    0.42
  13   4   2    2.39    0.33
  14  -4   2    1.47    0.39
 -14   4  -2    1.42    0.31
  14   4   2    1.69    0.30
 -14  -4  -2    1.78    0.40
 -15  -4  -2    1.49    0.42
  15  -4   2    0.76    0.36
 -15   4  -2    1.53    0.34
  15   4   2    1.20    0.28
 -16  -4  -2    3.51    0.57
 -16   4  -2    2.53    0.44
  16  -4   2    3.13    0.56
 -17   4  -2    5.00    0.58
 -17  -4  -2    5.60    0.71
  17  -4   2    4.55    0.67
 -18  -4  -2    0.64    0.42
 -18   4  -2    0.49    0.30
 -19   4  -2    0.11    0.27
 -20   4  -2    0.58    0.36
  19   5  -2    0.18    0.32
 -19  -5   2    0.43    0.35
  18   5  -2    0.69    0.32
 -18  -5   2    0.50    0.34
  17  -5  -2    0.26    0.36
  17   5  -2    0.09    0.26
 -17  -5   2    0.68    0.33
  16   5  -2    2.45    0.46
  16  -5  -2    2.27    0.48
 -16  -5   2    2.18    0.42
  15   5  -2    2.31    0.44
  15  -5  -2    2.48    0.50
 -15  -5   2    2.41    0.45
  14  -5  -2   -0.04    0.30
  14   5  -2    0.03    0.23
 -14  -5   2    0.53    0.30
  13  -5  -2    0.52    0.33
  13   5  -2    0.52    0.29
 -13  -5   2    0.61    0.27
 -12  -5   2    0.87    0.31
  12  -5  -2    0.92    0.34
  12   5  -2    1.12    0.31
  11   5  -2    1.94    0.38
 -11  -5   2    2.08    0.37
  11  -5  -2    2.05    0.39
 -10  -5   2    0.53    0.25
  10  -5  -2   -0.01    0.18
  10   5  -2    0.35    0.23
  -9  -5   2    0.53    0.22
   9   5  -2    0.76    0.26
   9  -5  -2    0.56    0.24
  -8  -5   2   -0.10    0.16
   8  -5  -2   -0.03    0.19
   8   5  -2   -0.10    0.23
  -7  -5   2   -0.20    0.18
   7   5  -2   -0.16    0.20
   7  -5  -2   -0.07    0.18
   6   5  -2    0.15    0.18
   6  -5  -2    0.03    0.19
  -6  -5   2    0.09    0.09
  -6  -5   2   -0.16    0.18
   5  -5  -2    0.06    0.18
   5   5  -2    0.37    0.23
  -5  -5   2    0.19    0.15
  -5  -5   2    0.15    0.07
  -4  -5   2   14.39    0.45
   4   5  -2   14.78    0.83
  -4  -5   2   15.42    0.64
   4  -5  -2   15.82    0.74
  -3  -5   2    4.87    0.27
   3   5  -2    4.55    0.48
   3  -5  -2    4.77    0.51
   3  -5  -2    4.93    0.46
   3  -5  -2    3.71    0.39
  -3  -5   2    4.43    0.34
  -2  -5   2    1.65    0.22
   2  -5  -2    1.82    0.25
   2  -5  -2    1.99    0.28
   2   5  -2    1.76    0.34
  -2  -5   2    1.47    0.17
   2  -5  -2    1.52    0.30
  -1  -5   2    1.20    0.19
   1  -5  -2    1.40    0.27
  -1  -5   2    1.38    0.20
   1   5  -2    1.08    0.28
   1  -5  -2    1.31    0.23
  -1   5   2    1.93    0.34
   1  -5  -2    1.43    0.28
   0   5   2   17.96    0.84
   0  -5  -2   19.05    0.92
   0  -5   2   17.73    0.59
   0  -5  -2   17.54    0.82
   0   5  -2   18.82    0.92
   0  -5  -2   17.75    0.68
   0  -5   2   17.85    0.68
  -1   5  -2    8.18    0.62
   1   5   2    9.42    0.62
  -1  -5  -2    8.81    0.60
   1  -5   2    9.17    0.53
   1  -5   2    7.93    0.39
  -1  -5  -2    8.89    0.45
  -1  -5  -2    9.30    0.62
  -2  -5  -2   19.46    0.63
  -2  -5  -2   20.47    0.90
  -2   5  -2   19.30    0.94
   2   5   2   19.99    0.89
   2  -5   2   18.53    0.59
  -2  -5  -2   18.36    0.85
   3   5   2    5.45    0.48
  -3   5  -2    5.75    0.53
  -3  -5  -2    5.47    0.31
  -3  -5  -2    5.88    0.52
  -3  -5  -2    5.76    0.48
   3  -5   2    4.91    0.32
  -4  -5  -2    3.17    0.41
   4  -5   2    2.83    0.25
  -4  -5  -2    2.76    0.34
  -4   5  -2    2.65    0.37
   4   5   2    3.12    0.39
  -4  -5  -2    3.04    0.21
  -5  -5  -2    1.84    0.34
   5   5   2    1.62    0.29
  -5  -5  -2    1.24    0.23
  -6  -5  -2    3.37    0.44
   6   5   2    3.35    0.39
  -6  -5  -2    3.27    0.37
   7   5   2    0.99    0.25
  -7  -5  -2    0.86    0.28
  -7  -5  -2    1.33    0.26
   8   5   2    2.23    0.33
  -8  -5  -2    2.32    0.41
  -8  -5  -2    2.01    0.33
  -9  -5  -2    3.95    0.50
   9   5   2    4.89    0.48
  -9  -5  -2    4.24    0.45
  10   5   2    1.06    0.27
  10  -5   2    0.93    0.31
 -10  -5  -2    1.10    0.30
 -10  -5  -2    0.57    0.25
 -11  -5  -2    0.32    0.21
  11   5   2   -0.06    0.19
  11  -5   2   -0.41    0.35
 -11  -5  -2    0.07    0.28
 -12  -5  -2    3.13    0.48
  12  -5   2    2.95    0.52
 -12  -5  -2    3.20    0.44
  12   5   2    3.22    0.41
 -13  -5  -2    2.05    0.47
  13   5   2    1.69    0.32
  13  -5   2    0.91    0.37
  14  -5   2   -0.19    0.34
 -14  -5  -2    0.00    0.31
 -15  -5  -2    0.63    0.35
  15  -5   2   -0.03    0.31
 -16  -5  -2    0.65    0.33
  17   6  -2    0.38    0.32
  16   6  -2    0.77    0.35
  15   6  -2   -0.09    0.28
  14   6  -2   -0.01    0.28
  14  -6  -2    0.58    0.36
  13  -6  -2    0.37    0.31
  13   6  -2    0.26    0.28
  12   6  -2    2.62    0.47
  12  -6  -2    2.15    0.46
  11   6  -2    0.64    0.30
  11  -6  -2    0.56    0.31
  10   6  -2    0.80    0.36
  10  -6  -2    0.59    0.28
   9   6  -2    0.92    0.34
   9  -6  -2    0.81    0.30
   8   6  -2    2.34    0.42
   8  -6  -2    1.95    0.39
   7   6  -2    1.22    0.34
   7  -6  -2    0.98    0.30
   6   6  -2    0.79    0.31
   6  -6  -2    1.23    0.30
   5  -6  -2    2.57    0.38
   5   6  -2    2.69    0.43
   5  -6  -2    2.56    0.40
   5  -6  -2    2.57    0.44
   4  -6  -2    2.03    0.33
   4  -6  -2    3.06    0.47
   4   6  -2    3.00    0.45
   4  -6  -2    3.11    0.39
   3  -6  -2    0.83    0.25
   3  -6  -2    1.19    0.27
   3   6  -2    1.34    0.37
   3  -6  -2    1.04    0.29
   2   6  -2    3.17    0.48
   2  -6  -2    3.36    0.39
   2  -6  -2    3.74    0.42
   2  -6  -2    3.56    0.48
   1  -6  -2    6.90    0.53
   1  -6  -2    7.23    0.63
   1   6  -2    7.91    0.69
   1  -6  -2    7.66    0.59
   0  -6  -2   -0.26    0.26
   0   6   2    0.20    0.22
   0  -6  -2   -0.01    0.15
   0  -6  -2    0.10    0.20
   0   6  -2   -0.16    0.22
  -1  -6  -2   -0.15    0.20
  -1  -6  -2    0.12    0.20
   1   6   2    0.23    0.23
  -1   6  -2    0.08    0.25
  -2  -6  -2   -0.01    0.22
  -2   6  -2   -0.08    0.21
   2   6   2    0.01    0.23
  -2  -6  -2    0.03    0.17
  -3  -6  -2    0.86    0.28
  -3   6  -2    0.79    0.31
   3   6   2    0.96    0.30
  -4  -6  -2    0.21    0.22
   4   6   2    0.20    0.22
   5   6   2    0.13    0.22
  -5  -6  -2    0.13    0.23
  -6  -6  -2   -0.05    0.22
   6   6   2    0.28    0.27
  -7  -6  -2    1.44    0.36
   7   6   2    2.59    0.41
   8   6   2   -0.02    0.24
  -8  -6  -2    0.18    0.26
  -9  -6  -2   -0.21    0.29
   9  -6   2   -0.98    0.41
   9   6   2   -0.27    0.26
  10  -6   2    0.26    0.34
  10   6   2    0.64    0.26
 -10  -6  -2    0.79    0.32
  11   6   2    0.91    0.29
 -11  -6  -2    1.45    0.37
  11  -6   2    1.07    0.40
  12  -6   2    0.84    0.39
 -12  -6  -2    0.54    0.29
 -13  -6  -2    1.09    0.39
 -14  -6  -2    1.36    0.45
  11   7  -2    0.09    0.30
  11  -7  -2    0.19    0.31
  10   7  -2   -0.44    0.36
  10  -7  -2   -0.29    0.30
   9   7  -2    0.61    0.35
   9  -7  -2    0.19    0.28
   8   7  -2   -0.40    0.32
   8  -7  -2    0.51    0.31
   7  -7  -2    1.41    0.38
   7   7  -2    0.90    0.37
   6   7  -2    0.54    0.37
   6  -7  -2    0.44    0.27
   5  -7  -2    0.47    0.25
   5   7  -2    0.67    0.33
   4   7  -2    0.86    0.35
   3   7  -2    2.02    0.47
   2   7  -2    1.27    0.41
   1   7  -2   -0.01    0.31
   0   7  -2    0.35    0.29
   1   7   2    0.77    0.35
  -1   7  -2    0.72    0.39
   2   7   2    0.48    0.29
  -2   7  -2    0.57    0.37
   3   7   2   -0.01    0.29
   4   7   2    1.56    0.40
   5   7   2    1.69    0.41
   6  -7   2   -0.17    0.36
   6   7   2    0.30    0.27
   7   7   2    0.00    0.26
   7  -7   2   -0.55    0.33
   8   7   2    0.00    0.25
   8  -7   2   -0.57    0.39
   9   7   2    0.50    0.29
  25   0  -3    0.58    0.33
  24   0  -3    0.54    0.33
 -23   0   3   -0.05    0.26
  23   0  -3   -0.07    0.23
 -22   0   3    0.12    0.26
  22   0  -3    0.45    0.27
  21   0  -3    0.12    0.22
 -21   0   3    0.10    0.28
  20   0  -3   -0.07    0.18
 -20   0   3    0.31    0.28
 -19   0   3    0.21    0.25
  19   0  -3   -0.15    0.21
 -18   0   3   -0.06    0.18
  18   0  -3    0.10    0.17
  17   0  -3   -0.11    0.20
 -17   0   3   -0.14    0.21
 -16   0   3    0.03    0.17
  16   0  -3    0.07    0.16
  15   0  -3    0.18    0.16
 -15   0   3    0.00    0.19
 -14   0   3    0.04    0.16
  14   0  -3   -0.10    0.16
 -13   0   3   -0.08    0.14
  13   0  -3    0.20    0.16
 -12   0   3   -0.01    0.14
  12   0  -3    0.10    0.15
 -11   0   3    0.21    0.15
  11   0  -3    0.03    0.12
 -10   0   3    0.04    0.10
  10   0  -3   -0.06    0.11
 -10   0   3    0.06    0.10
   9   0  -3   -0.01    0.10
  -9   0   3    0.10    0.10
  -9   0   3    0.07    0.09
   9   0  -3    0.00    0.09
  -8   0   3    0.00    0.10
   8   0  -3   -0.08    0.08
  -8   0   3   -0.05    0.08
   8   0  -3   -0.03    0.08
   7   0  -3   -0.09    0.08
  -7   0   3    0.00    0.08
  -7   0   3    0.04    0.05
   7   0  -3   -0.03    0.06
  -6   0   3   -0.06    0.07
  -6   0   3   -0.01    0.04
   6   0  -3    0.02    0.07
   6   0  -3   -0.04    0.07
  -5   0   3    0.02    0.05
   5   0  -3    0.06    0.06
   5   0  -3    0.03    0.06
  -5   0   3    0.00    0.06
  -4   0   3    0.06    0.05
   4   0  -3    0.00    0.05
   4   0  -3    0.00    0.05
  -4   0   3    0.01    0.06
   3   0  -3    0.12    0.05
  -3   0   3    0.02    0.05
   3   0  -3    0.03    0.05
   2   0  -3   -0.01    0.05
  -2   0   3   -0.01    0.04
   1   0  -3   -0.02    0.06
  -1   0   3   -0.03    0.05
  -1   0   3   -0.02    0.04
   0   0  -3    0.02    0.05
   0   0   3    0.01    0.05
   0   0  -3    0.03    0.02
   0   0  -3    0.04    0.06
   1   0   3    0.05    0.05
  -1   0  -3    0.00    0.05
  -1   0  -3    0.07    0.06
   1   0   3   -0.02    0.05
  -2   0  -3    0.05    0.07
   2   0   3    0.08    0.06
  -2   0  -3    0.03    0.05
   2   0   3    0.03    0.05
   3   0   3   -0.01    0.02
   3   0   3    0.01    0.06
  -3   0  -3   -0.02    0.08
   3   0   3   -0.02    0.06
  -3   0  -3   -0.01    0.06
   4   0   3    0.02    0.08
   4   0   3   -0.05    0.08
  -4   0  -3    0.02    0.09
  -4   0  -3    0.07    0.09
   5   0   3    0.00    0.07
   5   0   3    0.02    0.09
  -5   0  -3    0.08    0.09
  -5   0  -3   -0.20    0.11
  -6   0  -3    0.06    0.11
   6   0   3   -0.15    0.10
   6   0   3    0.17    0.12
  -6   0  -3   -0.07    0.11
  -7   0  -3    0.02    0.15
   7   0   3    0.06    0.10
  -7   0  -3   -0.04    0.11
  -8   0  -3   -0.04    0.13
  -9   0  -3    0.10    0.17
   9   0   3   -0.02    0.11
 -10   0  -3    0.01    0.15
  10   0   3    0.05    0.12
  11   0   3    0.02    0.13
 -11   0  -3    0.05    0.18
 -12   0  -3    0.22    0.21
  12   0   3   -0.06    0.16
 -13   0  -3    0.27    0.24
  13   0   3    0.31    0.20
  14   0   3   -0.09    0.15
 -14   0  -3    0.20    0.23
  15   0   3    0.11    0.18
 -15   0  -3    0.51    0.30
  16   0   3    0.08    0.19
 -16   0  -3    0.47    0.30
  17   0   3    0.27    0.24
 -17   0  -3    0.33    0.26
  18   0   3   -0.14    0.22
 -18   0  -3    0.00    0.26
  19   0   3   -0.36    0.28
 -20   0  -3    0.29    0.26
  20   0   3   -0.15    0.25
  21   0   3   -0.46    0.30
  24  -1  -3    0.27    0.31
 -23  -1   3   -0.11    0.25
 -23   1   3    0.27    0.32
  23   1  -3    0.35    0.27
  23  -1  -3   -0.14    0.25
 -22   1   3    0.35    0.29
 -22  -1   3   -0.03    0.25
  22  -1  -3   -0.10    0.24
  22   1  -3   -0.10    0.23
 -21  -1   3   -0.01    0.24
 -21   1   3   -0.09    0.32
  21   1  -3    0.34    0.27
  21  -1  -3   -0.06    0.25
 -20  -1   3   -0.18    0.24
 -20   1   3   -0.25    0.23
  20  -1  -3    0.25    0.27
  20   1  -3    0.15    0.20
 -19   1   3    0.69    0.32
  19  -1  -3    0.55    0.22
  19   1  -3    0.40    0.22
 -19  -1   3    0.30    0.24
  18  -1  -3    0.65    0.23
 -18  -1   3    0.81    0.28
  18   1  -3    0.45    0.21
 -18   1   3    0.57    0.27
  17  -1  -3   -0.14    0.19
 -17  -1   3    0.15    0.19
 -17   1   3   -0.03    0.20
  17   1  -3    0.14    0.17
  16  -1  -3    3.06    0.38
 -16  -1   3    2.99    0.37
  16   1  -3    2.72    0.32
 -16   1   3    3.44    0.43
 -15   1   3    0.01    0.18
  15  -1  -3    0.20    0.16
  15   1  -3    0.04    0.13
 -15  -1   3    0.16    0.24
 -14   1   3    3.84    0.40
 -14  -1   3    4.03    0.40
  14   1  -3    4.75    0.38
  14  -1  -3    4.19    0.41
 -13   1   3    0.11    0.16
  13   1  -3    0.10    0.12
  13  -1  -3   -0.20    0.18
 -13  -1   3    0.13    0.13
  12   1  -3    4.20    0.32
 -12  -1   3    4.01    0.35
 -12   1   3    3.76    0.35
  12  -1  -3    4.15    0.37
 -11  -1   3    4.87    0.37
  11  -1  -3    4.13    0.36
 -11  -1   3    4.76    0.35
  11   1  -3    4.40    0.32
 -11   1   3    4.86    0.38
 -10  -1   3    4.56    0.34
 -10  -1   3    4.61    0.32
  10  -1  -3    3.97    0.33
  10   1  -3    4.23    0.30
 -10   1   3    4.14    0.34
   9   1  -3    0.08    0.10
  -9   1   3   -0.02    0.13
  -9   1   3   -0.05    0.10
  -9  -1   3    0.04    0.11
   9  -1  -3    0.02    0.12
   9   1  -3    0.18    0.10
   9  -1  -3    0.14    0.13
  -9  -1   3    0.07    0.07
   8   1  -3    4.44    0.32
  -8   1   3    3.93    0.30
   8   1  -3    3.77    0.26
  -8  -1   3    3.80    0.26
  -8  -1   3    3.81    0.27
  -8   1   3    3.80    0.31
   8  -1  -3    3.94    0.29
   8  -1  -3    4.06    0.30
   7   1  -3    4.56    0.31
  -7   1   3    4.35    0.29
  -7  -1   3    3.60    0.24
  -7  -1   3    4.01    0.25
   7  -1  -3    4.39    0.29
  -7   1   3    4.20    0.31
   7   1  -3    3.92    0.25
   7  -1  -3    3.66    0.28
  -6  -1   3    4.04    0.24
  -6   1   3    4.12    0.28
   6   1  -3    4.18    0.25
  -6   1   3    4.04    0.27
  -6  -1   3    3.79    0.23
   6  -1  -3    4.17    0.27
   6  -1  -3    3.87    0.26
   6   1  -3    4.16    0.26
   5  -1  -3   14.30    0.46
  -5   1   3   14.59    0.48
   5  -1  -3   14.51    0.48
  -5   1   3   14.58    0.49
   5   1  -3   15.16    0.46
  -5  -1   3   14.49    0.44
  -5  -1   3   14.27    0.38
   5   1  -3   14.97    0.44
  -4  -1   3   32.94    0.65
  -4   1   3   33.05    0.67
   4  -1  -3   36.53    0.72
   4  -1  -3   33.64    0.64
  -4  -1   3   34.60    0.52
   4   1  -3   33.25    0.58
   3   1  -3  277.10    1.78
   3  -1  -3  281.12    1.69
  -3   1   3  278.82    1.76
  -3  -1   3  281.68    1.24
  -3  -1   3  275.86    1.85
   2   1  -3  186.50    1.43
  -2   1   3  190.51    1.29
  -2  -1   3  189.19    1.32
   2  -1  -3  191.55    1.23
   1   1  -3  260.32    1.17
   1  -1  -3  257.07    1.26
  -1  -1   3  254.64    1.54
   1   1  -3  257.00    1.64
   1  -1  -3  252.47    2.18
  -1   1   3  252.88    1.31
  -1  -1   3  245.69    1.22
   0  -1  -3    0.42    0.06
   0  -1  -3    0.48    0.06
   0  -1  -3    0.33    0.09
   0   1   3    0.40    0.05
   0   1  -3    0.40    0.08
   0   1   3    0.45    0.11
   0  -1   3    0.44    0.07
   0   1  -3    0.38    0.06
   0  -1   3    0.22    0.05
   1  -1   3    7.38    0.28
  -1   1  -3    7.32    0.28
   1   1   3    7.64    0.19
  -1  -1  -3    7.58    0.38
  -1   1  -3    7.10    0.28
  -1  -1  -3    7.07    0.36
  -1  -1  -3    7.35    0.19
   1  -1   3    7.68    0.29
   1   1   3    7.32    0.38
  -1   1  -3    7.70    0.21
   1  -1   3    7.46    0.21
  -2   1  -3   18.41    0.48
   2   1   3   17.02    0.60
  -2   1  -3   18.37    0.44
   2  -1   3   17.07    0.43
  -2  -1  -3   17.83    0.26
   2   1   3   17.87    0.27
  -2   1  -3   17.61    0.38
  -2  -1  -3   17.86    0.59
   2  -1   3   18.60    0.48
  -2  -1  -3   17.05    0.57
   2  -1   3   18.54    0.40
   2   1   3   18.26    0.58
   3   1   3   10.55    0.49
   3  -1   3   11.02    0.36
   3  -1   3   10.75    0.41
  -3  -1  -3   10.79    0.48
  -3  -1  -3   11.21    0.48
  -3   1  -3   10.46    0.34
  -3   1  -3   10.65    0.35
   3  -1   3   10.91    0.35
   3   1   3   10.99    0.22
   3   1   3   10.95    0.49
  -4  -1  -3    3.50    0.29
   4   1   3    3.53    0.30
   4   1   3    3.41    0.13
   4  -1   3    3.63    0.26
   4  -1   3    3.64    0.23
   4  -1   3    3.29    0.20
  -4   1  -3    3.14    0.21
  -4  -1  -3    2.90    0.27
   4   1   3    3.31    0.29
   5   1   3    8.85    0.23
   5  -1   3    8.32    0.34
  -5   1  -3    8.22    0.37
  -5  -1  -3    8.80    0.47
   5   1   3    8.45    0.48
   5  -1   3    8.48    0.43
   5   1   3    8.58    0.48
   5  -1   3    8.60    0.39
  -5  -1  -3    7.48    0.45
   6   1   3    7.25    0.46
  -6  -1  -3    7.59    0.47
   6  -1   3    7.32    0.33
   6   1   3    7.42    0.47
   6  -1   3    7.19    0.43
  -6  -1  -3    8.28    0.47
  -6   1  -3    7.54    0.38
   6   1   3    7.27    0.29
   6  -1   3    7.45    0.40
   7  -1   3    7.83    0.43
   7  -1   3    8.42    0.38
  -7  -1  -3    8.01    0.50
   7   1   3    8.22    0.33
  -7   1  -3    8.64    0.43
  -7  -1  -3    8.38    0.52
  -8  -1  -3   24.75    0.89
   8  -1   3   22.99    0.64
  -8  -1  -3   22.18    0.86
   8   1   3   21.87    0.59
  -8   1  -3   22.51    0.75
   8  -1   3   21.79    0.78
   9   1   3    0.90    0.15
  -9  -1  -3    0.56    0.19
  -9   1  -3    0.94    0.21
  -9  -1  -3    1.27    0.26
 -10  -1  -3    0.13    0.18
  10   1   3    0.09    0.09
 -10  -1  -3    0.08    0.16
 -10   1  -3    0.23    0.16
  11   1   3    2.52    0.26
 -11  -1  -3    2.58    0.36
 -11   1  -3    2.57    0.33
  11  -1   3    2.44    0.32
 -12  -1  -3    2.64    0.39
  12   1   3    3.02    0.30
  12  -1   3    2.90    0.36
 -12   1  -3    3.10    0.38
 -13   1  -3    8.28    0.60
  13   1   3    8.89    0.51
 -13  -1  -3    8.58    0.67
  13  -1   3    9.05    0.64
  14   1   3    1.42    0.24
  14  -1   3    1.57    0.30
 -14  -1  -3    1.98    0.41
  15   1   3    1.49    0.26
  15  -1   3    1.37    0.30
 -15  -1  -3    1.58    0.37
  16  -1   3    0.48    0.26
  16   1   3    0.31    0.17
 -16   1  -3    0.01    0.22
 -16  -1  -3    0.83    0.34
  17  -1   3    0.40    0.26
 -17   1  -3   -0.05    0.24
  17   1   3   -0.06    0.18
 -17  -1  -3    0.36    0.34
  18  -1   3    0.36    0.26
  18   1   3    0.11    0.17
 -18   1  -3    0.27    0.25
 -18  -1  -3    0.73    0.38
 -19  -1  -3    0.41    0.35
 -19   1  -3   -0.07    0.30
  19  -1   3    0.28    0.29
 -20   1  -3    0.43    0.33
  20  -1   3    0.51    0.32
 -20  -1  -3    0.04    0.31
  21  -1   3   -0.56    0.34
 -21   1  -3   -0.03    0.25
  22  -1   3   -0.20    0.32
  23  -2  -3   -0.12    0.28
  22  -2  -3    0.74    0.36
 -22   2   3    0.74    0.32
 -22  -2   3    0.35    0.33
  21  -2  -3    1.14    0.33
  21   2  -3    1.52    0.32
 -21  -2   3    1.26    0.40
 -21   2   3    1.29    0.41
 -20  -2   3    1.83    0.37
  20  -2  -3    1.79    0.39
  20   2  -3    2.20    0.35
 -20   2   3    2.26    0.44
 -19  -2   3    0.24    0.24
  19   2  -3    0.24    0.19
 -19   2   3   -0.04    0.23
  19  -2  -3   -0.28    0.27
  18  -2  -3    0.22    0.25
  18   2  -3    0.11    0.18
 -18  -2   3    0.14    0.20
 -18   2   3    0.20    0.21
  17  -2  -3    0.17    0.19
 -17   2   3   -0.03    0.21
 -17  -2   3    0.37    0.21
 -16  -2   3    3.92    0.43
  16  -2  -3    2.98    0.41
  16   2  -3    3.69    0.37
 -16   2   3    3.50    0.44
  15   2  -3    0.47    0.16
 -15   2   3    0.77    0.26
  15  -2  -3    0.30    0.23
  14   2  -3    0.12    0.13
 -14   2   3    0.26    0.22
  14  -2  -3    0.16    0.21
 -14  -2   3    0.31    0.23
  13  -2  -3    0.60    0.24
 -13   2   3    0.42    0.22
 -13  -2   3    0.47    0.21
  13   2  -3    0.23    0.12
  12   2  -3    9.41    0.47
 -12   2   3    9.36    0.57
  12  -2  -3   10.45    0.62
 -12  -2   3    9.25    0.57
 -12  -2   3    8.03    0.45
 -11  -2   3    1.03    0.16
  11   2  -3    1.41    0.20
  11   2  -3    1.32    0.23
  11  -2  -3    1.66    0.29
 -11   2   3    1.58    0.26
 -11  -2   3    1.38    0.25
  10   2  -3    7.79    0.45
  10   2  -3    6.62    0.42
  10   2  -3    7.63    0.41
 -10  -2   3    7.53    0.40
 -10  -2   3    7.87    0.48
  10  -2  -3    6.90    0.48
 -10   2   3    7.88    0.49
   9  -2  -3    0.80    0.20
   9   2  -3    0.56    0.13
   9   2  -3    0.85    0.18
   9   2  -3    0.93    0.16
   9   2  -3    0.86    0.20
  -9  -2   3    0.78    0.14
  -9   2   3    0.41    0.13
  -9  -2   3    0.78    0.18
  -8   2   3    2.59    0.28
   8  -2  -3    3.04    0.30
   8   2  -3    2.90    0.29
   8   2  -3    2.94    0.28
   8   2  -3    2.99    0.23
  -8  -2   3    2.57    0.26
  -8  -2   3    2.77    0.23
   7   2  -3    7.11    0.31
  -7  -2   3    7.32    0.37
  -7  -2   3    6.73    0.34
   7   2  -3    6.79    0.40
   7   2  -3    7.25    0.40
   7  -2  -3    6.79    0.41
   7  -2  -3    6.92    0.40
   6   2  -3   17.93    0.61
   6   2  -3   17.06    0.43
   6  -2  -3   17.85    0.61
   6   2  -3   17.31    0.58
  -6  -2   3   17.35    0.54
  -6  -2   3   16.27    0.52
   6  -2  -3   17.39    0.61
   5   2  -3   20.83    0.39
   5  -2  -3   20.96    0.64
  -5  -2   3   20.88    0.58
   5   2  -3   20.85    0.64
  -5  -2   3   21.32    0.54
   5  -2  -3   20.86    0.63
   5   2  -3   21.31    0.58
  -4  -2   3   21.51    0.48
   4  -2  -3   20.81    0.63
  -4  -2   3   21.96    0.59
   4   2  -3   21.58    0.64
   4  -2  -3   19.99    0.59
   4   2  -3   21.53    0.52
   3   2  -3    3.30    0.27
  -3  -2   3    3.51    0.24
   3  -2  -3    3.48    0.25
   3  -2  -3    3.75    0.24
  -3  -2   3    3.49    0.17
   3   2  -3    3.32    0.18
  -2  -2   3    9.83    0.22
   2  -2  -3    9.08    0.37
   2   2  -3    9.53    0.43
  -2  -2   3    9.53    0.40
   2  -2  -3    9.04    0.33
   2   2  -3    9.57    0.24
   1  -2  -3    2.12    0.25
  -1  -2   3    1.75    0.18
   1  -2  -3    2.15    0.14
   1   2  -3    2.31    0.22
   1  -2  -3    2.42    0.19
   0  -2  -3    0.77    0.11
   0  -2  -3    0.58    0.07
   0   2   3    0.60    0.10
   0  -2  -3    0.57    0.13
   0  -2   3    0.49    0.11
   0  -2   3    0.66    0.08
   0   2  -3    0.48    0.12
   0  -2  -3    0.77    0.16
  -1  -2  -3    1.91    0.24
  -1   2  -3    1.36    0.18
   1   2   3    1.67    0.15
   1  -2   3    1.75    0.14
   1  -2   3    1.52    0.17
   1   2   3    1.54    0.22
  -1  -2  -3    1.70    0.15
  -1  -2  -3    1.43    0.21
  -1  -2  -3    1.69    0.09
  -1   2  -3    1.51    0.09
  -2  -2  -3   28.71    0.85
   2  -2   3   28.78    0.62
   2   2   3   28.69    0.58
  -2  -2  -3   28.15    0.57
   2   2   3   28.82    0.89
  -2   2  -3   28.50    0.74
   2  -2   3   28.83    0.74
   2  -2   3   29.22    0.41
  -2   2  -3   29.46    0.46
  -2  -2  -3   28.79    0.84
   3   2   3   11.65    0.37
  -3  -2  -3   11.38    0.36
   3  -2   3   11.96    0.45
   3   2   3   12.00    0.60
   3  -2   3   11.81    0.48
  -3   2  -3   11.25    0.34
  -3   2  -3   11.75    0.48
   3  -2   3   11.67    0.32
  -3  -2  -3   11.69    0.56
  -3  -2  -3   11.80    0.55
   3   2   3   11.61    0.57
   4  -2   3    0.44    0.09
  -4   2  -3    0.51    0.14
  -4  -2  -3    0.32    0.14
   4   2   3    0.42    0.13
   4  -2   3    0.43    0.11
   4  -2   3    0.37    0.11
  -4   2  -3    0.32    0.09
   4   2   3    0.37    0.15
  -4  -2  -3    0.37    0.08
   4   2   3    0.39    0.09
  -4  -2  -3    0.61    0.16
   5   2   3    0.09    0.11
   5  -2   3    0.11    0.07
  -5  -2  -3    0.18    0.15
  -5   2  -3    0.10    0.08
   5  -2   3    0.21    0.10
   5  -2   3    0.27    0.12
  -5  -2  -3    0.13    0.14
   5   2   3    0.13    0.07
   6  -2   3    8.80    0.45
  -6  -2  -3    9.37    0.53
   6  -2   3    8.95    0.50
   6   2   3    8.91    0.35
   6  -2   3    9.64    0.43
  -6  -2  -3    9.24    0.57
  -6   2  -3    9.72    0.42
   7   2   3   11.85    0.41
  -7   2  -3   11.99    0.50
  -7  -2  -3   12.63    0.63
   7  -2   3   12.47    0.52
   7   2   3   11.25    0.24
  -7  -2  -3   11.81    0.66
   8  -2   3    0.07    0.11
  -8  -2  -3    0.25    0.17
   8   2   3   -0.01    0.04
  -8   2  -3   -0.04    0.11
   8   2   3    0.05    0.08
  -8  -2  -3    0.07    0.15
  -9  -2  -3   -0.13    0.22
  -9  -2  -3    0.22    0.16
   9   2   3    0.11    0.06
   9   2   3    0.11    0.09
  -9   2  -3    0.06    0.12
 -10  -2  -3    1.45    0.31
 -10   2  -3    1.93    0.27
 -10  -2  -3    2.32    0.34
  10   2   3    1.85    0.20
  10   2   3    1.63    0.15
 -11  -2  -3   12.35    0.76
 -11  -2  -3   13.86    0.81
 -11   2  -3   12.69    0.66
  11   2   3   12.60    0.42
  11   2   3   13.31    0.50
 -12  -2  -3    0.16    0.22
 -12   2  -3    0.12    0.17
  12   2   3    0.21    0.10
 -12  -2  -3    0.05    0.22
  12   2   3    0.17    0.12
  12  -2   3   -0.21    0.20
 -13  -2  -3    4.21    0.52
  13   2   3    4.22    0.32
  13   2   3    3.86    0.28
  13  -2   3    3.46    0.44
 -13   2  -3    3.96    0.42
 -14  -2  -3    3.03    0.46
  14   2   3    3.10    0.28
  14   2   3    2.78    0.26
 -14   2  -3    2.57    0.38
  14  -2   3    2.86    0.42
 -15  -2  -3    1.55    0.38
  15   2   3    1.79    0.24
 -15   2  -3    1.92    0.35
  15  -2   3    0.88    0.33
  15   2   3    1.94    0.25
 -16   2  -3    0.36    0.26
  16   2   3    0.38    0.17
  16  -2   3    0.62    0.29
 -16  -2  -3    1.20    0.42
 -17  -2  -3    0.11    0.28
 -17   2  -3    0.13    0.25
  17  -2   3   -0.09    0.21
  18  -2   3    0.03    0.24
 -18  -2  -3    0.46    0.35
 -18   2  -3   -0.02    0.24
 -19   2  -3    0.70    0.34
  19  -2   3    1.12    0.40
 -19  -2  -3    1.31    0.44
  20  -2   3    0.37    0.35
 -20   2  -3    0.25    0.33
  21  -2   3    1.40    0.44
  23   3  -3   -0.04    0.30
 -22  -3   3    0.47    0.36
 -22   3   3   -0.09    0.32
  22   3  -3    0.81    0.35
  21   3  -3    0.87    0.32
 -21  -3   3    0.20    0.25
  21  -3  -3    0.04    0.24
 -20  -3   3    2.06    0.44
  20  -3  -3    1.36    0.38
  20   3  -3    1.83    0.39
 -20   3   3    2.21    0.46
 -19   3   3    1.36    0.40
  19  -3  -3   -0.01    0.29
  19   3  -3    1.47    0.35
 -19  -3   3    0.49    0.29
 -18  -3   3   -0.07    0.20
 -18   3   3    0.01    0.26
  18   3  -3    0.14    0.25
  18  -3  -3   -0.28    0.28
  17   3  -3    3.18    0.43
 -17   3   3    2.90    0.47
  17  -3  -3    2.79    0.47
 -17  -3   3    3.40    0.49
  17   3  -3    2.06    0.31
  16   3  -3    0.60    0.27
 -16   3   3    0.66    0.29
  16  -3  -3    0.91    0.34
 -16  -3   3    0.76    0.31
  16   3  -3    0.50    0.19
 -15  -3   3    6.06    0.56
  15   3  -3    6.40    0.55
  15  -3  -3    6.74    0.66
 -15   3   3    5.22    0.53
  14  -3  -3    0.44    0.28
  14   3  -3    0.50    0.24
 -14   3   3    0.40    0.24
 -14  -3   3    0.84    0.28
 -13   3   3   -0.09    0.18
  13   3  -3    0.12    0.21
  13  -3  -3    0.10    0.22
 -13  -3   3    0.25    0.20
  12   3  -3   19.49    0.85
 -12  -3   3   18.74    0.66
 -12   3   3   20.34    0.89
 -12  -3   3   19.94    0.87
  12  -3  -3   19.18    0.92
 -11  -3   3    9.22    0.46
  11   3  -3    8.78    0.52
  11   3  -3    9.80    0.59
 -11  -3   3    9.86    0.59
  11  -3  -3    9.05    0.61
 -11   3   3    9.34    0.59
  10   3  -3    4.86    0.37
  10   3  -3    4.36    0.40
 -10  -3   3    4.12    0.30
 -10  -3   3    4.73    0.41
  10  -3  -3    4.69    0.44
   9  -3  -3    2.87    0.35
   9   3  -3    3.04    0.27
  -9  -3   3    3.03    0.32
  -9  -3   3    2.96    0.25
   9   3  -3    3.18    0.35
   8   3  -3    0.14    0.14
   8   3  -3   -0.04    0.13
   8  -3  -3    0.09    0.15
  -8  -3   3    0.27    0.10
   8   3  -3    0.14    0.09
  -8  -3   3    0.24    0.16
  -7  -3   3   23.32    0.72
   7   3  -3   23.67    0.82
   7   3  -3   22.77    0.60
   7  -3  -3   23.82    0.82
   7   3  -3   24.13    0.81
  -7  -3   3   22.63    0.67
  -6  -3   3   12.65    0.50
   6   3  -3   11.31    0.58
  -6  -3   3   11.14    0.48
   6  -3  -3   11.92    0.57
   6   3  -3   11.62    0.52
   6   3  -3   11.53    0.38
  -5  -3   3    6.92    0.34
   5  -3  -3    6.40    0.39
   5  -3  -3    7.08    0.41
   5   3  -3    6.73    0.44
   5   3  -3    7.05    0.37
   4   3  -3   10.13    0.54
   4   3  -3   10.85    0.42
  -4  -3   3   10.38    0.39
   4  -3  -3    9.98    0.47
   3   3  -3    7.25    0.45
   3  -3  -3    7.56    0.38
   3   3  -3    8.22    0.34
  -3  -3   3    7.32    0.29
   2   3  -3   30.78    0.91
   2  -3  -3   29.42    0.83
  -2  -3   3   30.61    0.51
   2  -3  -3   30.30    0.72
  -1   3   3   19.13    0.63
   1   3  -3   20.21    0.75
   1  -3  -3   19.76    0.66
   1  -3  -3   18.72    0.79
   1  -3  -3   18.05    0.52
  -1  -3   3   19.72    0.35
  -1  -3   3   19.53    0.29
   0   3  -3   19.22    0.72
   0  -3  -3   17.89    0.62
   0  -3  -3   17.37    0.76
   0  -3  -3   17.45    0.46
   0  -3   3   17.84    0.27
   0  -3   3   17.34    0.30
   0  -3  -3   17.94    0.74
   0   3   3   17.70    0.61
  -1   3  -3    3.48    0.32
  -1  -3  -3    3.78    0.37
  -1  -3  -3    3.80    0.35
  -1  -3  -3    3.73    0.18
  -1  -3  -3    3.65    0.28
   1   3   3    3.66    0.29
   1  -3   3    3.35    0.14
  -2  -3  -3   52.57    1.01
  -2  -3  -3   56.27    0.56
  -2  -3  -3   54.30    1.30
  -2   3  -3   54.17    1.22
   2   3   3   53.04    1.02
   2  -3   3   51.90    0.57
  -2  -3  -3   54.25    1.29
  -3  -3  -3    2.95    0.34
   3   3   3    2.97    0.25
  -3  -3  -3    2.47    0.23
   3   3   3    2.45    0.33
  -3   3  -3    2.83    0.31
   3  -3   3    3.00    0.17
  -3  -3  -3    2.96    0.33
   4   3   3    8.67    0.58
  -4   3  -3    8.26    0.36
  -4  -3  -3    8.43    0.40
  -4  -3  -3    8.68    0.54
   4   3   3    7.99    0.40
   4  -3   3    8.50    0.32
  -4  -3  -3    8.64    0.55
  -4   3  -3    8.10    0.49
  -5   3  -3   22.67    0.62
   5   3   3   22.58    0.67
  -5  -3  -3   21.57    0.84
  -5  -3  -3   22.13    0.62
   5  -3   3   23.26    0.58
  -5  -3  -3   22.66    0.91
   6   3   3   12.69    0.51
  -6  -3  -3   13.04    0.73
  -6   3  -3   13.04    0.51
   6  -3   3   13.06    0.49
  -6  -3  -3   12.78    0.66
  -7  -3  -3    0.00    0.18
   7   3   3    0.13    0.11
  -7   3  -3    0.19    0.13
  -7  -3  -3   -0.05    0.16
   7  -3   3   -0.13    0.11
   8  -3   3    0.49    0.14
  -8  -3  -3    0.38    0.24
  -8  -3  -3    0.63    0.23
   8   3   3    0.42    0.13
  -8   3  -3    0.41    0.15
  -9   3  -3    7.80    0.48
  -9  -3  -3    7.76    0.58
   9   3   3    8.11    0.44
  -9  -3  -3    9.21    0.67
 -10  -3  -3   20.65    0.94
  10   3   3   19.69    0.68
 -10   3  -3   18.82    0.78
 -10  -3  -3   20.43    0.99
 -11  -3  -3   -0.11    0.26
  11   3   3    0.35    0.15
 -11  -3  -3    0.10    0.19
 -11   3  -3    0.47    0.20
  12   3   3   13.70    0.59
 -12  -3  -3   15.32    0.85
 -12   3  -3   12.91    0.71
 -12  -3  -3   13.28    0.86
 -13  -3  -3    0.31    0.24
 -13  -3  -3    0.51    0.29
 -13   3  -3    0.34    0.21
  13  -3   3   -0.08    0.27
  13   3   3    0.06    0.13
 -14  -3  -3    0.70    0.33
 -14   3  -3    0.63    0.26
  14  -3   3    0.37    0.28
  14   3   3    0.38    0.16
  15  -3   3    1.18    0.37
  15   3   3    0.65    0.18
 -15   3  -3    0.42    0.24
 -15  -3  -3    0.71    0.32
 -16  -3  -3    2.85    0.51
 -16   3  -3    3.59    0.49
  16  -3   3    3.00    0.51
 -17  -3  -3    0.92    0.34
 -17   3  -3   -0.03    0.25
  17  -3   3    0.78    0.34
 -18   3  -3   -0.04    0.25
  18  -3   3    0.08    0.26
 -18  -3  -3    0.33    0.37
  19  -3   3    0.09    0.27
 -19   3  -3    0.33    0.30
 -20   3  -3    0.11    0.28
 -21  -4   3   -0.43    0.34
  21   4  -3   -0.50    0.35
 -21   4   3    0.51    0.32
 -20   4   3   -0.15    0.29
 -20  -4   3    0.25    0.29
  20   4  -3    0.25    0.26
  19   4  -3    1.04    0.33
 -19   4   3    1.58    0.43
  19  -4  -3    0.98    0.33
  18   4  -3   -0.03    0.27
  18  -4  -3   -0.21    0.32
 -18   4   3   -0.11    0.27
 -18  -4   3    0.28    0.29
 -17   4   3    0.32    0.27
  17   4  -3    0.28    0.27
  17  -4  -3    0.89    0.36
 -17  -4   3    0.86    0.34
 -16  -4   3    2.25    0.42
  16  -4  -3    1.93    0.41
  16   4  -3    1.46    0.35
  15  -4  -3    5.00    0.59
 -15  -4   3    4.79    0.54
  15   4  -3    4.51    0.51
  14  -4  -3    0.74    0.32
 -14  -4   3    1.21    0.32
  14   4  -3    0.72    0.23
  13  -4  -3    0.14    0.26
  13   4  -3   -0.15    0.24
 -13  -4   3    0.11    0.21
  12  -4  -3    4.77    0.51
  12   4  -3    3.88    0.43
 -12  -4   3    4.03    0.44
  11   4  -3    8.01    0.60
 -11  -4   3    7.51    0.55
  11  -4  -3    8.33    0.62
  10   4  -3    4.82    0.48
 -10  -4   3    5.13    0.43
  10  -4  -3    5.02    0.48
 -10  -4   3    4.72    0.33
  -9  -4   3    4.27    0.32
   9   4  -3    4.40    0.45
   9   4  -3    4.71    0.35
  -9  -4   3    4.86    0.41
   9  -4  -3    4.74    0.45
  -8  -4   3    2.02    0.23
   8   4  -3    1.81    0.20
   8  -4  -3    1.31    0.25
  -8  -4   3    1.85    0.27
   8   4  -3    1.90    0.32
  -7  -4   3    5.22    0.36
   7   4  -3    5.17    0.47
  -7  -4   3    4.98    0.38
   7  -4  -3    4.40    0.42
   7   4  -3    4.98    0.40
  -6  -4   3    3.23    0.29
   6   4  -3    3.42    0.38
   6  -4  -3    3.20    0.34
  -6  -4   3    3.20    0.29
   6   4  -3    3.21    0.32
  -5  -4   3    3.87    0.29
   5  -4  -3    3.66    0.34
   5   4  -3    3.97    0.40
   5   4  -3    3.82    0.33
  -4  -4   3    1.57    0.19
   4   4  -3    1.99    0.31
   4  -4  -3    1.34    0.21
  -3  -4   3    1.71    0.18
   3   4  -3    1.87    0.30
   3  -4  -3    1.85    0.23
  -3  -4   3    1.61    0.10
  -2  -4   3   15.68    0.36
   2   4  -3   16.51    0.78
   2  -4  -3   16.60    0.85
  -2  -4   3   16.89    0.47
   2  -4  -3   17.47    0.61
   1   4  -3    5.79    0.46
   1  -4  -3    6.00    0.48
  -1  -4   3    5.75    0.28
  -1   4   3    6.51    0.44
   1  -4  -3    6.01    0.50
  -1  -4   3    6.19    0.26
  -1  -4   3    6.35    0.23
   1  -4  -3    5.45    0.33
   0  -4  -3    8.41    0.56
   0  -4   3    7.96    0.25
   0   4   3    8.64    0.51
   0  -4  -3    8.10    0.37
   0   4  -3    7.98    0.56
   0  -4  -3    8.53    0.59
   0  -4   3    7.94    0.28
  -1  -4  -3    1.79    0.30
  -1  -4  -3    1.76    0.27
   1  -4   3    1.83    0.13
   1   4   3    1.95    0.26
  -1   4  -3    1.80    0.28
  -1  -4  -3    1.90    0.17
   1  -4   3    1.87    0.14
  -2  -4  -3    3.59    0.38
  -2  -4  -3    3.27    0.39
   2  -4   3    2.92    0.17
   2   4   3    3.25    0.32
  -2  -4  -3    3.07    0.19
  -2   4  -3    3.00    0.36
  -3   4  -3    3.20    0.37
  -3  -4  -3    4.04    0.42
   3  -4   3    3.50    0.19
   3   4   3    3.40    0.33
  -3  -4  -3    3.12    0.15
  -3  -4  -3    3.39    0.38
  -4  -4  -3    1.35    0.29
  -4   4  -3    1.23    0.27
  -4  -4  -3    1.34    0.28
   4   4   3    1.12    0.21
   4  -4   3    1.32    0.14
  -5  -4  -3    2.32    0.33
  -5  -4  -3    1.54    0.30
   5   4   3    1.95    0.25
   5  -4   3    2.18    0.19
  -6  -4  -3    3.88    0.45
   6   4   3    4.06    0.35
   6  -4   3    4.22    0.28
  -6  -4  -3    4.02    0.39
   7   4   3    5.82    0.43
  -7  -4  -3    5.39    0.48
   7  -4   3    6.59    0.38
  -7  -4  -3    5.42    0.52
  -8  -4  -3    8.25    0.59
  -8   4  -3    8.31    0.50
   8   4   3    7.68    0.49
  -8  -4  -3    7.91    0.65
  -9  -4  -3    2.69    0.43
  -9   4  -3    2.22    0.29
   9   4   3    2.66    0.31
  -9  -4  -3    2.76    0.40
 -10  -4  -3    0.60    0.25
  10   4   3    1.05    0.22
 -10   4  -3    0.66    0.20
 -10  -4  -3    0.78    0.26
 -11  -4  -3    5.61    0.59
  11   4   3    5.40    0.43
 -11   4  -3    5.35    0.46
 -11  -4  -3    5.98    0.55
 -12  -4  -3    3.50    0.50
  12  -4   3    2.74    0.44
 -12  -4  -3    3.93    0.48
 -12   4  -3    4.07    0.43
  12   4   3    3.23    0.35
 -13  -4  -3    0.13    0.28
 -13   4  -3    0.45    0.22
  13   4   3    0.79    0.22
  13  -4   3    0.28    0.30
 -13  -4  -3    0.88    0.31
 -14  -4  -3    0.23    0.27
  14  -4   3   -0.03    0.32
 -14   4  -3    0.08    0.19
 -15  -4  -3    0.98    0.41
 -15   4  -3    1.04    0.33
  15  -4   3    0.83    0.38
 -16  -4  -3    0.63    0.36
  16  -4   3    1.05    0.44
 -16   4  -3    1.06    0.32
  17  -4   3   -0.16    0.35
 -17  -4  -3    0.18    0.33
 -17   4  -3   -0.13    0.24
 -18   4  -3    0.33    0.29
 -19   4  -3    0.46    0.34
  20   5  -3    0.20    0.35
  19   5  -3   -0.01    0.28
  18   5  -3    0.95    0.37
 -18  -5   3    0.13    0.28
  17  -5  -3    0.61    0.35
  17   5  -3   -0.08    0.26
 -17  -5   3   -0.23    0.27
  16  -5  -3    0.03    0.31
  16   5  -3    0.13    0.29
 -16  -5   3    0.14    0.23
  15   5  -3    0.16    0.28
 -15  -5   3    0.70    0.33
  15  -5  -3    1.20    0.44
  14  -5  -3    0.79    0.34
  14   5  -3    0.69    0.32
 -14  -5   3    0.72    0.30
  13  -5  -3    1.05    0.34
  13   5  -3    1.21    0.37
 -13  -5   3    0.94    0.31
  12  -5  -3    0.64    0.31
  12   5  -3    0.10    0.24
 -12  -5   3    0.60    0.27
  11  -5  -3    0.35    0.28
  11   5  -3   -0.13    0.24
 -11  -5   3    0.19    0.18
  10   5  -3    6.57    0.59
 -10  -5   3    6.92    0.54
  10  -5  -3    6.08    0.59
   9   5  -3    6.44    0.59
  -9  -5   3    5.81    0.48
   9  -5  -3    4.94    0.52
  -8  -5   3    0.34    0.18
   8  -5  -3    0.73    0.27
   8   5  -3    0.79    0.31
  -7  -5   3    0.22    0.15
   7  -5  -3    0.16    0.20
   7   5  -3    0.02    0.22
   6  -5  -3    3.30    0.39
   6   5  -3    3.73    0.46
  -6  -5   3    4.20    0.35
   5  -5  -3   20.09    0.84
   5   5  -3   18.95    0.97
  -5  -5   3   19.16    0.69
   4   5  -3    2.90    0.42
  -4  -5   3    3.07    0.27
   4  -5  -3    3.05    0.44
   4  -5  -3    2.97    0.34
  -3  -5   3    1.41    0.19
   3  -5  -3    1.82    0.37
   3  -5  -3    1.24    0.27
   3  -5  -3    1.45    0.24
   3   5  -3    1.47    0.31
  -2  -5   3   23.36    0.49
   2  -5  -3   26.36    1.16
  -2  -5   3   26.11    0.65
   2  -5  -3   25.09    0.82
   2  -5  -3   25.59    1.05
   2   5  -3   25.50    1.09
   1  -5  -3    4.10    0.47
   1  -5  -3    4.69    0.46
  -1  -5   3    3.93    0.25
  -1  -5   3    3.93    0.25
   1  -5  -3    3.60    0.32
   1   5  -3    3.78    0.45
   0   5  -3    7.60    0.61
   0  -5  -3    7.58    0.59
   0  -5   3    7.68    0.41
   0   5   3    7.79    0.57
   0  -5  -3    8.31    0.64
   0  -5  -3    7.29    0.41
   0  -5   3    7.24    0.31
  -1   5  -3    9.82    0.69
   1   5   3    9.93    0.63
  -1  -5  -3    8.15    0.63
  -1  -5  -3    8.91    0.42
   1  -5   3    8.22    0.32
  -1  -5  -3    9.13    0.65
   2   5   3   28.45    1.04
  -2  -5  -3   28.77    1.13
  -2   5  -3   29.38    1.16
  -2  -5  -3   28.02    0.66
   2  -5   3   26.43    0.57
  -2  -5  -3   28.69    1.12
  -3   5  -3   13.09    0.79
   3   5   3   10.90    0.66
  -3  -5  -3   11.75    0.71
  -3  -5  -3   11.78    0.37
  -3  -5  -3   11.61    0.75
  -4  -5  -3    0.19    0.20
  -4   5  -3    0.72    0.30
   4   5   3    0.24    0.19
  -4  -5  -3    0.46    0.20
  -5  -5  -3    1.16    0.31
  -5  -5  -3    1.09    0.25
   5   5   3    1.32    0.27
  -6  -5  -3    3.02    0.44
   6   5   3    2.78    0.35
  -6  -5  -3    2.30    0.33
  -7  -5  -3    6.35    0.62
   7   5   3    6.19    0.50
  -7  -5  -3    5.63    0.51
  -8  -5  -3   12.08    0.76
   8   5   3   13.41    0.73
  -8  -5  -3   13.19    0.88
  -9  -5  -3    3.25    0.44
  -9  -5  -3    3.79    0.55
   9   5   3    3.46    0.38
  10   5   3    2.42    0.34
 -10  -5  -3    2.28    0.43
 -10  -5  -3    2.17    0.38
 -11  -5  -3   -0.12    0.34
 -11  -5  -3    0.43    0.24
  11   5   3    0.34    0.20
 -12  -5  -3    1.16    0.35
 -12  -5  -3    1.52    0.35
  12  -5   3    1.89    0.46
  12   5   3    1.46    0.30
 -13  -5  -3    1.64    0.43
 -13  -5  -3    1.71    0.39
  13  -5   3    1.19    0.43
  14  -5   3    3.01    0.60
 -14  -5  -3    3.37    0.56
 -15  -5  -3    0.46    0.35
  17   6  -3    0.29    0.32
  16   6  -3    0.89    0.40
  15   6  -3    1.66    0.44
  14   6  -3    0.40    0.34
  14  -6  -3    0.16    0.33
  13  -6  -3    0.24    0.31
  13   6  -3    0.14    0.27
  12  -6  -3    1.82    0.45
  12   6  -3    1.21    0.41
  11  -6  -3    0.57    0.30
  11   6  -3    1.54    0.44
  10   6  -3    1.63    0.39
  10  -6  -3    2.80    0.47
   9   6  -3    8.12    0.75
   9  -6  -3    8.60    0.70
   8  -6  -3    7.40    0.65
   8   6  -3    7.55    0.72
   7   6  -3    0.63    0.28
   7  -6  -3    1.19    0.30
   6   6  -3    0.47    0.30
   6  -6  -3    0.16    0.22
   5  -6  -3    1.81    0.41
   5  -6  -3    1.24    0.32
   5  -6  -3    1.79    0.34
   5   6  -3    1.74    0.38
   4  -6  -3    1.18    0.27
   4  -6  -3    1.55    0.38
   4  -6  -3    1.40    0.31
   4   6  -3    1.68    0.39
   3  -6  -3    0.82    0.26
   3   6  -3    1.39    0.35
   3  -6  -3    1.45    0.28
   3  -6  -3    1.24    0.31
   2  -6  -3    0.21    0.25
   2  -6  -3    0.12    0.15
   2   6  -3    0.27    0.27
   2  -6  -3    0.04    0.20
   1  -6  -3    0.11    0.22
   1  -6  -3    0.36    0.25
   1   6  -3   -0.01    0.27
   1  -6  -3    0.39    0.18
   0  -6  -3   -0.15    0.26
   0  -6  -3    0.18    0.22
   0   6  -3    0.06    0.23
  -1  -6  -3    1.03    0.30
  -1   6  -3    1.33    0.38
   1   6   3    1.25    0.32
  -1  -6  -3    1.10    0.31
  -2  -6  -3    0.46    0.24
  -2   6  -3    0.45    0.29
   2   6   3    1.00    0.31
  -2  -6  -3    0.47    0.22
  -3  -6  -3    0.23    0.23
  -3   6  -3    0.03    0.25
   3   6   3    0.52    0.25
  -3  -6  -3    0.60    0.23
  -4  -6  -3    0.63    0.26
   4   6   3    0.74    0.28
  -4  -6  -3    0.73    0.27
  -5  -6  -3    0.81    0.29
   5   6   3    0.94    0.29
  -6  -6  -3    0.04    0.24
   6   6   3    0.03    0.20
  -7  -6  -3   -0.09    0.25
   7   6   3    0.22    0.22
   8   6   3    1.53    0.32
  -8  -6  -3    1.85    0.42
  -9  -6  -3    1.30    0.41
   9   6   3    1.91    0.36
 -10  -6  -3    0.32    0.30
  10   6   3    0.35    0.21
  10  -6   3    0.05    0.35
 -11  -6  -3   -0.03    0.28
  11  -6   3   -0.17    0.37
 -12  -6  -3    0.36    0.33
 -13  -6  -3    1.07    0.42
  11  -7  -3    0.61    0.34
  10  -7  -3    0.43    0.34
  10   7  -3   -0.18    0.36
   9  -7  -3    0.29    0.29
   9   7  -3   -0.29    0.33
   8  -7  -3    0.34    0.30
   8   7  -3   -0.36    0.35
   7   7  -3   -0.59    0.38
   7  -7  -3    0.37    0.28
   6   7  -3    2.12    0.44
   5   7  -3    1.39    0.39
   4   7  -3    1.08    0.41
   3   7  -3    0.13    0.30
   2   7  -3    1.43    0.44
   1   7  -3    4.19    0.62
   0   7  -3    5.87    0.70
  -1   7  -3    3.60    0.58
  -2   7  -3    2.95    0.53
   3   7   3    1.02    0.36
   4   7   3    1.67    0.40
   5   7   3    1.78    0.38
   6   7   3    1.77    0.41
   7   7   3    0.69    0.31
   8  -7   3    0.18    0.29
  25   0  -4    2.00    0.44
  24   0  -4    0.77    0.33
 -23   0   4    0.21    0.29
  23   0  -4    0.21    0.27
  22   0  -4    6.16    0.63
 -22   0   4    5.00    0.63
 -21   0   4    7.92    0.72
  21   0  -4    9.06    0.72
 -20   0   4    2.69    0.46
  20   0  -4    4.19    0.49
 -19   0   4    0.28    0.27
  19   0  -4    0.11    0.22
  18   0  -4    1.52    0.30
 -18   0   4    1.17    0.32
  17   0  -4   14.91    0.77
 -17   0   4   14.75    0.82
  16   0  -4   13.12    0.71
 -16   0   4   11.93    0.72
  15   0  -4   11.53    0.64
 -15   0   4   12.05    0.69
 -14   0   4   17.84    0.80
  14   0  -4   18.88    0.77
 -13   0   4   94.23    1.72
  13   0  -4   92.40    1.64
  12   0  -4   16.82    0.68
 -12   0   4   18.74    0.74
  11   0  -4   24.97    0.79
 -11   0   4   25.59    0.82
 -10   0   4   25.59    0.77
  10   0  -4   24.38    0.75
   9   0  -4   28.12    0.76
  -9   0   4   28.66    0.78
  -9   0   4   28.82    0.81
  -8   0   4    3.70    0.28
   8   0  -4    3.40    0.26
  -8   0   4    3.45    0.27
   8   0  -4    3.39    0.27
   7   0  -4   34.15    0.76
  -7   0   4   34.18    0.79
   7   0  -4   32.95    0.74
  -7   0   4   33.31    0.75
   6   0  -4   30.14    0.68
  -6   0   4   30.08    0.70
  -6   0   4   31.32    0.69
   6   0  -4   30.55    0.67
  -5   0   4   16.35    0.48
   5   0  -4   16.89    0.47
   5   0  -4   16.81    0.48
  -5   0   4   16.10    0.47
   4   0  -4  372.43    2.13
   4   0  -4  376.58    2.17
  -4   0   4  376.45    2.22
   3   0  -4  180.65    1.48
  -3   0   4  175.86    1.49
   2   0  -4  115.98    1.39
  -2   0   4  119.33    1.21
   2   0  -4  122.27    1.21
  -1   0   4    3.63    0.20
   1   0  -4    3.48    0.24
  -1   0   4    3.95    0.26
   0   0  -4    8.41    0.20
   0   0  -4    8.63    0.38
   0   0   4    8.21    0.38
   0   0  -4    8.12    0.34
   1   0   4    0.27    0.09
   1   0   4    0.22    0.08
  -1   0  -4    0.40    0.11
  -1   0  -4    0.27    0.04
  -1   0  -4    0.28    0.10
  -2   0  -4   87.01    1.27
  -2   0  -4   85.05    1.17
  -2   0  -4   86.87    0.55
   2   0   4   88.24    0.55
   2   0   4   91.92    1.33
   2   0   4   89.24    1.21
  -3   0  -4   10.09    0.46
   3   0   4   10.19    0.21
   3   0   4   10.16    0.44
   3   0   4   10.70    0.48
  -3   0  -4    9.36    0.43
  -4   0  -4    7.71    0.43
   4   0   4    8.23    0.22
   4   0   4    8.38    0.45
  -4   0  -4    8.04    0.42
   4   0   4    8.32    0.42
  -5   0  -4   89.43    1.43
  -5   0  -4   90.66    1.50
   5   0   4   91.82    0.81
   5   0   4   86.83    1.43
   5   0   4   90.87    1.54
   6   0   4  162.05    2.16
  -6   0  -4  160.86    2.10
  -6   0  -4  154.49    1.99
   6   0   4  154.46    2.02
  -7   0  -4    0.41    0.14
  -7   0  -4    0.50    0.17
  -8   0  -4   37.03    1.13
  -8   0  -4   38.25    1.09
  -9   0  -4   71.30    1.55
 -10   0  -4   56.43    1.44
  10   0   4   55.01    1.24
 -11   0  -4   20.53    0.92
  11   0   4   21.17    0.81
  12   0   4   16.71    0.75
 -12   0  -4   17.49    0.89
  13   0   4   18.99    0.83
 -13   0  -4   19.48    0.96
 -14   0  -4   26.48    1.15
  14   0   4   26.11    1.03
 -15   0  -4   19.05    1.02
  15   0   4   20.23    0.92
  16   0   4    3.18    0.41
 -16   0  -4    3.17    0.48
  17   0   4    5.68    0.54
 -17   0  -4    5.45    0.62
  18   0   4    3.49    0.48
 -18   0  -4    3.56    0.54
  19   0   4    2.39    0.41
 -19   0  -4    3.22    0.54
  20   0   4    1.24    0.33
  24  -1  -4    0.25    0.31
  24   1  -4    0.26    0.28
 -23   1   4    0.49    0.27
  23  -1  -4    0.40    0.30
  23   1  -4    0.89    0.33
 -23  -1   4    0.12    0.31
 -22   1   4    0.68    0.38
  22   1  -4    0.50    0.27
  22  -1  -4    0.73    0.31
 -22  -1   4    0.77    0.37
  21  -1  -4   -0.18    0.21
  21   1  -4    0.31    0.24
 -21  -1   4    0.36    0.32
 -21   1   4    0.02    0.23
  20  -1  -4    0.08    0.21
 -20  -1   4    0.48    0.28
 -20   1   4    0.06    0.27
  20   1  -4    0.27    0.23
  19  -1  -4    0.06    0.21
 -19  -1   4   -0.11    0.20
  19   1  -4    0.01    0.18
 -19   1   4   -0.04    0.24
  18   1  -4    0.99    0.25
  18  -1  -4    1.31    0.30
 -18   1   4    1.02    0.30
 -18  -1   4    1.25    0.31
  17   1  -4    0.10    0.16
  17  -1  -4    0.02    0.20
 -17   1   4    0.19    0.19
 -17  -1   4    0.20    0.22
  16   1  -4    1.41    0.25
  16  -1  -4    1.54    0.31
 -16  -1   4    1.18    0.26
 -16   1   4    1.52    0.32
  15  -1  -4    3.31    0.38
 -15   1   4    3.28    0.40
 -15  -1   4    3.18    0.37
  15   1  -4    3.19    0.34
 -14   1   4    9.39    0.60
  14   1  -4    9.62    0.53
 -14  -1   4    9.78    0.58
  14  -1  -4    9.99    0.61
  13  -1  -4    2.40    0.31
 -13   1   4    2.47    0.33
  13   1  -4    2.61    0.28
 -13  -1   4    2.32    0.30
 -12  -1   4   23.71    0.82
  12   1  -4   23.73    0.76
  12  -1  -4   23.73    0.85
 -12   1   4   23.40    0.85
 -11   1   4   24.60    0.83
  11   1  -4   24.16    0.75
  11  -1  -4   23.32    0.82
 -11  -1   4   24.92    0.80
  10   1  -4    6.87    0.39
 -10  -1   4    6.44    0.39
 -10   1   4    6.71    0.43
 -10  -1   4    6.21    0.38
  10  -1  -4    6.72    0.42
  -9   1   4   17.75    0.65
  -9  -1   4   16.74    0.59
  -9  -1   4   17.72    0.59
   9   1  -4   16.91    0.66
   9   1  -4   17.03    0.58
   9  -1  -4   17.66    0.65
   8  -1  -4  134.14    1.74
   8   1  -4  132.77    1.56
  -8  -1   4  132.44    1.53
   8   1  -4  135.14    1.71
  -8  -1   4  131.73    1.56
   8  -1  -4  136.39    1.68
  -8   1   4  133.32    1.78
  -8   1   4  138.51    1.74
   7  -1  -4   34.01    0.84
  -7   1   4   33.81    0.84
  -7  -1   4   33.20    0.71
  -7  -1   4   33.39    0.77
   7   1  -4   33.32    0.77
   7  -1  -4   34.01    0.80
   7   1  -4   33.42    0.79
  -7   1   4   32.72    0.85
   6  -1  -4   22.62    0.65
  -6  -1   4   22.63    0.53
   6   1  -4   22.06    0.62
  -6  -1   4   23.18    0.62
   6  -1  -4   22.17    0.61
  -6   1   4   22.92    0.65
   6   1  -4   21.81    0.58
   5   1  -4  162.47    1.65
   5  -1  -4  169.16    1.73
  -5  -1   4  163.82    1.62
   5  -1  -4  163.25    1.56
  -5   1   4  162.42    1.64
  -5  -1   4  163.86    1.30
   4  -1  -4  984.66    3.51
   4   1  -4  986.09    2.92
  -4   1   4 1000.00    3.71
  -4  -1   4  993.48    2.94
   3   1  -4  140.94    1.15
   3   1  -4  142.86    1.35
   3  -1  -4  139.01    1.21
   3   1  -4  141.86    0.96
  -3   1   4  137.69    1.28
  -3  -1   4  141.59    1.44
   2   1  -4  202.52    1.06
   2   1  -4  199.52    1.57
  -2  -1   4  202.25    1.42
   2  -1  -4  197.29    1.37
   2   1  -4  200.37    1.34
  -2   1   4  197.00    1.42
   2  -1  -4  200.01    2.12
   1  -1  -4   25.56    0.47
   1   1  -4   27.00    0.56
  -1  -1   4   26.83    0.52
   1   1  -4   26.03    0.50
   1  -1  -4   27.44    0.80
  -1   1   4   27.33    0.81
  -1  -1   4   26.80    0.52
  -1   1   4   27.07    0.48
   0  -1  -4  309.55    2.50
   0   1  -4  303.91    1.86
   0  -1  -4  307.41    1.28
   0   1  -4  303.16    1.83
   0  -1   4  304.78    1.78
   0   1  -4  303.91    1.45
   0  -1   4  303.13    1.90
   0  -1  -4  308.03    2.68
   0   1   4  299.12    2.65
   0   1   4  306.67    1.55
   1   1   4  160.11    1.10
  -1   1  -4  161.57    1.18
  -1   1  -4  163.48    1.45
  -1  -1  -4  162.01    0.82
   1  -1   4  163.96    1.50
  -1  -1  -4  164.63    1.95
   1   1   4  160.04    1.95
   1  -1   4  164.44    1.32
  -1   1  -4  159.36    1.36
  -1  -1  -4  157.21    1.81
   1  -1   4  165.12    1.19
   2   1   4  101.66    1.51
  -2   1  -4  101.35    1.09
   2   1   4  100.20    1.57
  -2  -1  -4  105.40    1.57
  -2   1  -4  101.82    1.04
   2  -1   4  102.13    1.29
  -2   1  -4  100.01    1.26
  -2  -1  -4   99.06    1.47
   2  -1   4  101.43    1.07
   2  -1   4  102.35    1.07
  -3  -1  -4  102.44    1.58
   3  -1   4   99.84    1.38
  -3   1  -4  105.20    1.39
   3  -1   4  102.18    1.12
   3   1   4  100.58    1.63
  -3   1  -4   98.91    1.14
  -3   1  -4  102.02    1.10
   3  -1   4   99.49    1.17
  -3  -1  -4   96.47    1.52
   3   1   4  102.96    1.58
   4   1   4   99.27    0.60
  -4   1  -4  101.04    1.26
  -4   1  -4  103.73    1.48
   4  -1   4   99.62    1.15
  -4  -1  -4  103.25    1.63
   4   1   4  103.52    1.71
   4  -1   4  103.34    1.50
  -4  -1  -4   99.45    1.61
   4  -1   4  104.20    1.31
   4   1   4  105.86    1.69
   5  -1   4   38.64    0.74
   5   1   4   38.73    0.43
  -5  -1  -4   38.66    1.05
   5  -1   4   36.50    0.85
   5   1   4   37.58    1.08
   5  -1   4   37.97    0.97
  -5   1  -4   38.05    0.84
  -5  -1  -4   36.69    1.02
   5   1   4   38.84    1.07
   6   1   4   22.69    0.36
  -6  -1  -4   22.95    0.84
   6  -1   4   23.33    0.61
   6  -1   4   22.60    0.79
   6  -1   4   23.34    0.73
  -6   1  -4   22.86    0.69
  -6  -1  -4   23.18    0.84
   7  -1   4    9.41    0.50
   7  -1   4   10.34    0.42
  -7  -1  -4    9.76    0.58
  -7   1  -4    9.73    0.50
  -7  -1  -4    9.26    0.56
  -8  -1  -4   50.35    1.34
   8  -1   4   49.56    0.97
  -8   1  -4   50.18    1.15
  -8  -1  -4   49.39    1.32
   8   1   4   45.78    0.90
  -9  -1  -4    0.96    0.23
   9   1   4    0.88    0.16
  -9   1  -4    1.32    0.24
  -9  -1  -4    1.20    0.27
   9  -1   4    1.12    0.18
 -10  -1  -4   13.23    0.77
 -10   1  -4   13.09    0.66
 -10  -1  -4   12.31    0.73
  10   1   4   13.33    0.54
  10  -1   4   12.12    0.52
 -11  -1  -4    1.79    0.31
  11   1   4    2.22    0.25
 -11  -1  -4    1.88    0.34
 -11   1  -4    2.37    0.33
 -12  -1  -4    0.56    0.27
 -12   1  -4    0.67    0.25
  12  -1   4    0.22    0.19
  12   1   4    0.85    0.20
 -13  -1  -4   10.64    0.76
  13   1   4   11.68    0.60
 -13   1  -4   11.03    0.69
  13  -1   4   10.64    0.69
 -14  -1  -4    2.47    0.43
  14  -1   4    2.51    0.36
 -14   1  -4    3.09    0.43
  14   1   4    2.87    0.33
  15  -1   4    0.11    0.19
  15   1   4   -0.25    0.20
 -16  -1  -4    0.76    0.32
  16   1   4    0.57    0.19
  16  -1   4    0.82    0.29
  17  -1   4    1.42    0.32
 -17   1  -4    1.63    0.37
  17   1   4    1.26    0.29
 -17  -1  -4    1.43    0.40
 -18   1  -4    0.16    0.26
  18  -1   4    0.47    0.27
 -18  -1  -4    0.70    0.34
  19  -1   4    1.18    0.36
 -19   1  -4    0.90    0.38
 -19  -1  -4    1.47    0.43
 -20   1  -4   -0.10    0.30
  20  -1   4    0.29    0.33
 -20  -1  -4    0.90    0.38
  21  -1   4    0.48    0.30
  22  -1   4   -1.14    0.43
  23  -2  -4    0.73    0.35
 -23  -2   4    0.47    0.36
 -22   2   4    1.07    0.40
  22  -2  -4    1.28    0.40
 -22  -2   4    1.19    0.38
 -21   2   4    2.48    0.45
  21  -2  -4    2.58    0.48
  21   2  -4    2.72    0.40
 -21  -2   4    2.30    0.44
  20   2  -4    1.04    0.28
 -20  -2   4    1.27    0.33
  20  -2  -4    1.35    0.37
 -20   2   4    1.06    0.37
  19  -2  -4    1.74    0.36
  19   2  -4    2.24    0.34
 -19  -2   4    2.32    0.40
 -19   2   4    1.76    0.38
 -18  -2   4    5.37    0.53
 -18   2   4    6.59    0.61
  18   2  -4    6.62    0.51
  18  -2  -4    5.03    0.54
 -17   2   4    8.71    0.69
  17   2  -4    9.18    0.58
  17  -2  -4    8.43    0.66
 -17  -2   4    8.68    0.65
  16   2  -4    0.63    0.20
 -16  -2   4    0.92    0.27
  16  -2  -4    0.99    0.27
 -16   2   4    0.83    0.28
  15  -2  -4   27.85    1.10
 -15  -2   4   32.12    1.10
 -15   2   4   33.10    1.18
  15   2  -4   32.86    0.99
  14   2  -4    9.52    0.54
  14  -2  -4    9.19    0.64
 -14   2   4   10.09    0.66
 -14  -2   4    9.74    0.59
 -13   2   4   37.87    1.20
  13   2  -4   37.64    1.02
  13  -2  -4   37.40    1.19
 -13  -2   4   38.19    1.10
  12   2  -4   13.78    0.61
 -12  -2   4   14.04    0.64
  12  -2  -4   13.50    0.70
 -12   2   4   13.22    0.70
  11   2  -4    1.70    0.23
  11  -2  -4    1.87    0.26
  11   2  -4    1.80    0.24
 -11  -2   4    1.78    0.24
 -11   2   4    1.50    0.25
 -10  -2   4    6.54    0.40
  10   2  -4    5.83    0.38
  10   2  -4    6.84    0.42
  10   2  -4    6.52    0.42
 -10  -2   4    6.33    0.38
  10  -2  -4    6.36    0.45
 -10   2   4    6.71    0.47
   9   2  -4   39.27    0.85
   9   2  -4   38.54    1.04
  -9  -2   4   38.73    0.89
  -9  -2   4   36.52    0.88
   9   2  -4   37.89    0.94
   9  -2  -4   37.57    1.02
  -9   2   4   38.00    1.05
   9   2  -4   38.32    0.97
   8   2  -4   21.57    0.73
   8   2  -4   22.87    0.59
  -8  -2   4   22.38    0.67
   8   2  -4   22.58    0.73
  -8  -2   4   22.24    0.62
   8  -2  -4   21.73    0.74
   7   2  -4    0.01    0.08
   7  -2  -4    0.19    0.12
  -7   2   4    0.11    0.08
   7   2  -4    0.25    0.14
  -7  -2   4    0.17    0.09
   7   2  -4    0.13    0.07
   7  -2  -4    0.07    0.11
  -7  -2   4    0.10    0.08
   6   2  -4    5.01    0.21
  -6   2   4    5.00    0.35
   6  -2  -4    4.74    0.34
   6  -2  -4    4.80    0.32
   6   2  -4    4.83    0.34
   6   2  -4    4.93    0.29
  -6  -2   4    5.18    0.26
  -6  -2   4    4.76    0.32
   5   2  -4    9.42    0.22
  -5  -2   4   10.26    0.31
  -5  -2   4   10.26    0.45
   5   2  -4   10.78    0.49
  -5   2   4   10.11    0.47
   5  -2  -4    9.60    0.42
   5   2  -4    9.72    0.37
   5  -2  -4   10.45    0.49
  -4  -2   4    2.99    0.14
   4   2  -4    2.74    0.24
  -4  -2   4    3.13    0.24
   4  -2  -4    2.60    0.21
   4   2  -4    2.94    0.18
  -4   2   4    2.69    0.23
   3  -2  -4    1.78    0.16
  -3  -2   4    1.76    0.08
   3   2  -4    1.50    0.21
  -3  -2   4    1.87    0.19
   3  -2  -4    1.84    0.18
   3   2  -4    1.64    0.12
  -3   2   4    2.09    0.19
   2  -2  -4   44.99    0.82
   2   2  -4   46.54    0.97
   2  -2  -4   48.91    1.18
  -2  -2   4   47.82    0.89
   2  -2  -4   48.34    0.74
  -2   2   4   48.35    0.82
   1  -2  -4    1.20    0.22
  -1  -2   4    1.30    0.10
   1  -2  -4    1.25    0.14
   1  -2  -4    1.31    0.12
  -1  -2   4    1.21    0.15
  -1   2   4    1.43    0.13
   1   2  -4    1.22    0.18
   0   2  -4   60.41    1.10
   0  -2  -4   62.95    1.28
   0   2   4   62.84    0.75
   0  -2   4   62.21    0.76
   0  -2  -4   61.00    1.36
   0  -2  -4   61.99    0.88
   0  -2  -4   61.18    0.65
   0  -2   4   60.31    1.04
   1   2   4    1.51    0.24
  -1  -2  -4    1.69    0.24
  -1  -2  -4    1.58    0.14
  -1  -2  -4    1.63    0.10
   1   2   4    1.62    0.14
   1  -2   4    1.56    0.15
  -1  -2  -4    1.21    0.21
  -1   2  -4    1.71    0.19
   1  -2   4    1.75    0.19
   1   2   4    1.55    0.10
  -1   2  -4    1.49    0.09
   2   2   4    5.02    0.41
  -2  -2  -4    5.36    0.41
  -2  -2  -4    6.10    0.42
  -2   2  -4    5.26    0.20
   2  -2   4    4.80    0.31
   2   2   4    4.85    0.23
  -2   2  -4    5.23    0.33
  -2  -2  -4    5.20    0.24
   2  -2   4    4.93    0.28
   2  -2   4    5.07    0.19
   3  -2   4   90.83    1.36
  -3   2  -4   90.62    0.98
  -3   2  -4   91.15    1.34
   3  -2   4   92.09    0.96
   3  -2   4   92.75    1.30
  -3  -2  -4   91.23    1.65
  -3  -2  -4   91.71    0.95
   3   2   4   89.95    1.74
   3   2   4   91.20    1.68
  -3  -2  -4   91.86    1.66
   3   2   4   92.28    0.97
   4  -2   4   45.61    1.00
   4  -2   4   46.74    1.00
  -4  -2  -4   47.47    1.20
  -4   2  -4   46.69    0.97
   4   2   4   47.84    1.29
   4  -2   4   44.85    0.79
  -4  -2  -4   48.90    1.22
   4   2   4   47.33    0.69
   5  -2   4   39.83    0.95
  -5  -2  -4   40.15    1.13
   5  -2   4   39.54    0.99
   5  -2   4   40.20    0.82
  -5  -2  -4   38.61    1.14
   5   2   4   40.18    0.65
   6  -2   4   41.44    0.98
   6   2   4   39.53    0.66
   6  -2   4   40.31    0.91
  -6  -2  -4   40.38    1.22
  -6  -2  -4   41.70    1.17
   7   2   4   42.28    0.47
   7   2   4   44.59    0.74
  -7  -2  -4   45.39    1.26
   7  -2   4   45.45    1.04
  -7  -2  -4   45.51    1.33
  -8   2  -4   33.39    0.92
   8  -2   4   34.13    0.98
   8   2   4   34.28    0.66
  -8  -2  -4   34.88    1.15
  -8  -2  -4   34.47    1.19
   8   2   4   33.85    0.50
  -9  -2  -4   23.29    0.98
   9   2   4   21.60    0.46
  -9   2  -4   21.03    0.77
   9   2   4   21.45    0.55
  -9  -2  -4   22.42    0.99
  10   2   4   32.89    0.64
 -10  -2  -4   33.75    1.26
  10   2   4   33.77    0.73
 -10  -2  -4   34.35    1.21
 -10   2  -4   32.78    1.02
 -11  -2  -4    0.49    0.25
  11   2   4    0.90    0.14
  11   2   4    0.74    0.14
 -11   2  -4    0.70    0.21
 -11  -2  -4    0.92    0.31
 -12  -2  -4    9.91    0.74
  12   2   4   10.40    0.44
  12   2   4    9.80    0.42
 -12   2  -4   10.42    0.63
 -12  -2  -4    9.49    0.72
  13   2   4   24.58    0.70
 -13  -2  -4   23.36    1.16
  13   2   4   24.30    0.68
 -13   2  -4   24.25    1.01
  13  -2   4   23.40    1.11
 -14   2  -4    7.35    0.59
  14   2   4    7.08    0.40
  14   2   4    7.79    0.41
 -14  -2  -4    7.84    0.71
  14  -2   4    6.53    0.62
 -15  -2  -4    5.36    0.63
  15  -2   4    3.92    0.51
 -15   2  -4    4.87    0.52
 -16  -2  -4    8.55    0.78
  16  -2   4    8.22    0.75
 -16   2  -4    8.60    0.68
  17  -2   4    3.70    0.55
 -17   2  -4    4.23    0.53
 -17  -2  -4    4.80    0.63
 -18   2  -4    2.20    0.44
  18  -2   4    2.95    0.51
 -18  -2  -4    3.81    0.62
 -19   2  -4    1.20    0.39
  19  -2   4    1.10    0.36
 -19  -2  -4    1.16    0.44
  20  -2   4    2.11    0.46
 -20   2  -4    2.28    0.47
  24   3  -4    0.28    0.30
  23   3  -4   -0.04    0.29
 -22  -3   4    0.06    0.25
 -22   3   4    0.26    0.34
  22   3  -4   -0.06    0.27
  21  -3  -4    0.36    0.33
 -21   3   4    0.20    0.30
  21   3  -4    0.69    0.36
 -21  -3   4    0.40    0.27
 -20  -3   4    1.32    0.36
  20  -3  -4    1.26    0.36
  20   3  -4    1.59    0.39
 -20   3   4    1.22    0.40
 -19  -3   4    1.19    0.33
  19  -3  -4    1.35    0.35
 -19   3   4    1.84    0.40
  19   3  -4    2.18    0.44
 -18  -3   4    0.39    0.26
  18  -3  -4   -0.04    0.25
  18   3  -4    0.82    0.30
 -18   3   4    0.32    0.28
  18   3  -4    0.06    0.17
 -17   3   4    2.05    0.38
 -17  -3   4    2.09    0.35
  17  -3  -4    1.65    0.37
  17   3  -4    2.39    0.40
  17   3  -4    1.64    0.29
 -16   3   4    2.63    0.41
 -16  -3   4    2.56    0.37
  16  -3  -4    1.97    0.36
  16   3  -4    2.99    0.42
 -15   3   4    0.48    0.26
 -15  -3   4    0.25    0.20
  15  -3  -4    0.28    0.23
  15   3  -4    0.52    0.26
 -14   3   4    1.32    0.29
  14  -3  -4    1.16    0.29
  14   3  -4    1.59    0.31
 -14  -3   4    1.78    0.33
  13   3  -4    4.18    0.44
 -13   3   4    3.12    0.40
 -13  -3   4    3.91    0.42
  13  -3  -4    4.43    0.47
  12  -3  -4    4.32    0.45
 -12  -3   4    5.29    0.45
  12   3  -4    4.42    0.43
  12   3  -4    3.93    0.35
  11   3  -4    7.74    0.45
  11   3  -4    9.03    0.58
  11  -3  -4    9.36    0.61
 -11  -3   4    7.79    0.50
  10   3  -4   14.54    0.72
  10   3  -4   13.87    0.55
 -10  -3   4   14.37    0.58
 -10  -3   4   14.07    0.65
  10  -3  -4   13.50    0.70
  -9  -3   4   18.23    0.65
   9   3  -4   18.95    0.58
   9   3  -4   19.16    0.79
   9  -3  -4   18.87    0.80
  -9  -3   4   18.77    0.70
  -8  -3   4    8.36    0.45
   8   3  -4    8.56    0.36
  -8  -3   4    7.89    0.44
   8   3  -4    8.28    0.53
   8  -3  -4    8.23    0.51
   8   3  -4    8.63    0.50
  -7  -3   4   23.89    0.69
   7   3  -4   21.89    0.49
   7   3  -4   23.00    0.84
   7  -3  -4   22.96    0.81
   7   3  -4   22.01    0.74
  -7  -3   4   22.44    0.73
  -6  -3   4   25.88    0.66
  -6  -3   4   25.67    0.77
   6   3  -4   25.14    0.88
   6  -3  -4   25.19    0.81
   6   3  -4   24.82    0.73
   5  -3  -4   40.84    0.95
  -5  -3   4   41.41    0.75
   5   3  -4   41.57    1.11
   5   3  -4   40.68    0.82
  -4  -3   4   42.99    0.67
   4   3  -4   42.48    1.11
   4  -3  -4   41.94    0.95
   4   3  -4   43.84    0.77
   3   3  -4   38.23    1.04
   3  -3  -4   37.99    0.81
  -3  -3   4   36.91    0.52
   3   3  -4   35.82    0.60
   2  -3  -4  101.39    1.51
   2   3  -4  108.84    1.76
   2  -3  -4  106.28    1.95
   2  -3  -4  104.11    1.24
   1  -3  -4   88.15    1.38
   1   3  -4   89.50    1.58
   1  -3  -4   85.52    1.76
   1  -3  -4   90.04    1.07
   0  -3  -4   48.66    1.34
   0  -3  -4   52.25    1.33
   0   3  -4   50.62    1.19
   0  -3  -4   51.17    1.04
   0   3   4   52.41    1.00
   0  -3   4   51.96    0.70
   0  -3  -4   53.27    0.72
  -1  -3  -4    9.27    0.44
   1  -3   4   10.08    0.37
   1   3   4    9.78    0.44
  -1   3  -4    9.89    0.54
  -1  -3  -4    9.01    0.59
  -1  -3  -4    9.99    0.27
  -1  -3  -4    9.53    0.58
  -2   3  -4   45.23    1.13
   2  -3   4   44.46    0.86
  -2  -3  -4   42.99    0.90
  -2  -3  -4   45.03    1.26
  -2  -3  -4   44.13    1.25
  -2  -3  -4   43.90    0.41
   2   3   4   44.25    0.91
  -3  -3  -4   41.27    1.22
   3  -3   4   43.38    0.94
  -3   3  -4   44.26    0.70
   3  -3   4   41.38    0.56
  -3   3  -4   42.37    1.10
   3   3   4   39.81    0.86
  -3  -3  -4   42.38    0.85
  -3  -3  -4   43.89    1.24
   4  -3   4   25.13    0.78
  -4  -3  -4   23.95    0.93
   4   3   4   24.32    0.66
  -4   3  -4   24.73    0.59
   4  -3   4   25.36    0.53
  -4  -3  -4   24.79    0.97
  -4   3  -4   26.04    0.85
  -4  -3  -4   24.84    0.65
   5  -3   4    5.36    0.40
  -5  -3  -4    6.32    0.32
   5  -3   4    6.08    0.31
   5   3   4    5.87    0.33
  -5  -3  -4    5.50    0.46
  -5   3  -4    5.77    0.32
  -5   3  -4    6.08    0.44
  -5  -3  -4    5.68    0.50
   6   3   4    7.58    0.39
  -6  -3  -4    7.70    0.55
  -6   3  -4    7.54    0.39
   6  -3   4    7.85    0.38
  -6  -3  -4    7.22    0.58
   7   3   4    4.46    0.30
  -7  -3  -4    4.29    0.44
   7  -3   4    4.74    0.34
  -7   3  -4    4.70    0.33
  -7  -3  -4    4.54    0.48
  -8   3  -4   17.86    0.67
  -8  -3  -4   18.22    0.94
  -8  -3  -4   18.02    0.86
   8   3   4   17.03    0.58
   8  -3   4   17.95    0.69
  -9   3  -4    0.25    0.17
   9   3   4   -0.08    0.11
  -9  -3  -4    0.09    0.18
  -9  -3  -4    0.06    0.20
 -10  -3  -4    0.00    0.20
  10   3   4    0.09    0.11
 -10  -3  -4    0.23    0.22
 -10   3  -4    0.06    0.16
 -11  -3  -4    0.11    0.25
 -11   3  -4    0.11    0.16
  11   3   4    0.20    0.13
 -11  -3  -4    0.17    0.21
 -12  -3  -4    2.47    0.44
 -12   3  -4    2.52    0.35
  12   3   4    2.50    0.27
 -12  -3  -4    1.95    0.39
 -13  -3  -4    1.50    0.38
 -13   3  -4    1.60    0.33
 -13  -3  -4    1.34    0.36
  13   3   4    1.57    0.23
  13  -3   4    1.47    0.35
 -14  -3  -4    1.72    0.40
 -14   3  -4    1.13    0.27
  14  -3   4    1.15    0.35
 -15  -3  -4   -0.05    0.28
 -15   3  -4    0.02    0.20
  15  -3   4   -0.35    0.31
 -16  -3  -4    0.00    0.33
 -16   3  -4   -0.02    0.23
  16  -3   4    0.70    0.34
 -17  -3  -4    1.32    0.44
  17  -3   4    0.51    0.32
 -17   3  -4    1.23    0.36
 -18   3  -4    0.20    0.25
  18  -3   4    0.20    0.33
 -19   3  -4    0.39    0.32
 -20   3  -4    0.14    0.31
  22   4  -4    0.30    0.31
  21   4  -4    0.14    0.28
 -21   4   4    0.06    0.28
 -21  -4   4   -0.03    0.28
  20   4  -4   -0.35    0.31
 -20  -4   4   -0.33    0.30
 -19  -4   4    0.77    0.31
  19  -4  -4    0.52    0.33
  19   4  -4    0.28    0.27
  18   4  -4   -0.16    0.31
  18  -4  -4    0.01    0.28
 -18  -4   4    0.28    0.25
 -17  -4   4    0.97    0.31
  17  -4  -4    1.09    0.34
  17   4  -4    0.56    0.28
  16   4  -4    3.59    0.50
  16  -4  -4    2.84    0.46
 -16  -4   4    3.81    0.50
  15   4  -4    1.92    0.40
  15  -4  -4    2.22    0.41
 -15  -4   4    1.87    0.37
  14   4  -4    4.23    0.49
 -14  -4   4    3.92    0.46
  14  -4  -4    3.86    0.48
  13   4  -4    2.40    0.39
  13  -4  -4    3.18    0.46
 -13  -4   4    2.50    0.36
  12   4  -4    2.33    0.38
  12  -4  -4    3.38    0.47
 -12  -4   4    2.88    0.38
  11   4  -4   11.10    0.71
 -11  -4   4   11.00    0.64
  11  -4  -4   11.60    0.72
  10   4  -4   13.02    0.76
 -10  -4   4   13.84    0.69
  10  -4  -4   12.26    0.73
   9   4  -4   12.66    0.74
   9   4  -4   13.05    0.48
  -9  -4   4   13.00    0.63
   9  -4  -4   12.28    0.73
   8  -4  -4    2.07    0.32
   8   4  -4    1.51    0.33
  -8  -4   4    1.74    0.25
   7  -4  -4    0.62    0.21
   7   4  -4    0.33    0.15
   7   4  -4    0.64    0.24
  -7  -4   4    0.56    0.17
   6   4  -4    5.07    0.46
  -6  -4   4    4.93    0.33
   6  -4  -4    5.51    0.42
   6   4  -4    4.94    0.36
   5   4  -4    6.36    0.52
  -5  -4   4    7.10    0.35
   5  -4  -4    6.73    0.44
   5   4  -4    6.16    0.38
   4  -4  -4    0.57    0.18
  -4  -4   4    0.79    0.13
   4   4  -4    0.58    0.22
   3  -4  -4    0.79    0.18
   3  -4  -4    0.89    0.27
   3   4  -4    0.48    0.22
  -3  -4   4    0.53    0.09
   2  -4  -4    0.01    0.18
   2  -4  -4    0.05    0.19
  -2  -4   4    0.15    0.05
   2   4  -4    0.00    0.14
   2  -4  -4    0.30    0.12
   1  -4  -4    1.01    0.25
   1  -4  -4    1.31    0.28
  -1  -4   4    1.59    0.11
   1   4  -4    1.15    0.27
  -1  -4   4    1.34    0.12
   1  -4  -4    1.40    0.17
   0  -4  -4    1.45    0.31
   0  -4  -4    1.46    0.30
   0   4   4    1.49    0.23
   0  -4   4    1.57    0.14
   0  -4  -4    1.47    0.16
   0   4  -4    1.12    0.24
  -1   4  -4   21.51    0.91
   1  -4   4   22.02    0.58
   1   4   4   20.76    0.76
  -1  -4  -4   21.64    0.49
  -1  -4  -4   21.05    0.97
  -1  -4  -4   21.24    0.94
   2   4   4    7.80    0.47
   2  -4   4    8.45    0.40
  -2  -4  -4    7.09    0.56
  -2   4  -4    8.27    0.56
  -2  -4  -4    8.63    0.25
  -2  -4  -4    8.45    0.61
   3  -4   4    8.05    0.43
  -3   4  -4    8.02    0.57
   3   4   4    7.66    0.47
  -3  -4  -4    7.75    0.60
   3  -4   4    7.47    0.21
   3  -4   4    6.75    0.21
  -3  -4  -4    7.79    0.58
  -4  -4  -4    4.12    0.44
   4  -4   4    4.61    0.37
   4   4   4    4.72    0.37
  -4   4  -4    4.91    0.46
   4  -4   4    4.51    0.21
  -4  -4  -4    4.66    0.50
  -5   4  -4    6.94    0.54
  -5  -4  -4    6.79    0.56
   5   4   4    6.32    0.42
   5  -4   4    6.39    0.29
  -5  -4  -4    5.90    0.55
  -6  -4  -4   13.63    0.85
   6   4   4   13.87    0.61
  -6  -4  -4   13.48    0.76
   7   4   4   16.64    0.67
  -7  -4  -4   17.58    0.88
  -7   4  -4   16.11    0.64
  -7  -4  -4   17.76    0.96
  -8   4  -4   17.97    0.71
   8   4   4   17.47    0.69
  -8  -4  -4   16.48    0.88
  -8  -4  -4   17.37    0.99
  -9  -4  -4   17.13    0.91
   9   4   4   17.47    0.70
  -9   4  -4   17.67    0.74
  -9  -4  -4   18.07    1.03
 -10  -4  -4    0.23    0.24
 -10   4  -4    0.21    0.17
  10   4   4    0.14    0.14
 -10  -4  -4    0.27    0.24
  11   4   4    5.02    0.39
 -11  -4  -4    4.49    0.57
 -11   4  -4    5.51    0.47
 -11  -4  -4    5.74    0.58
 -12  -4  -4    7.05    0.72
 -12  -4  -4    7.06    0.66
  12   4   4    7.42    0.49
 -12   4  -4    7.04    0.55
  13  -4   4    4.58    0.64
 -13  -4  -4    4.85    0.62
 -13   4  -4    4.52    0.48
 -13  -4  -4    4.92    0.58
 -14  -4  -4   -0.30    0.36
 -14  -4  -4    0.68    0.34
  14  -4   4    0.39    0.34
 -14   4  -4   -0.10    0.21
  15  -4   4    3.95    0.61
 -15   4  -4    2.65    0.42
 -15  -4  -4    2.71    0.51
 -16  -4  -4    3.23    0.61
  16  -4   4    2.73    0.55
 -16   4  -4    2.89    0.45
 -17   4  -4    1.38    0.39
 -18   4  -4    0.64    0.34
  20   5  -4    0.26    0.36
  19   5  -4    0.07    0.32
  18   5  -4    0.02    0.28
  17   5  -4    0.43    0.34
  17  -5  -4   -0.40    0.39
  16   5  -4   -0.13    0.29
  16  -5  -4    0.00    0.29
 -16  -5   4    0.28    0.27
  15   5  -4    0.99    0.35
 -15  -5   4    1.18    0.35
  14   5  -4    0.31    0.28
  14  -5  -4    0.30    0.30
 -14  -5   4   -0.04    0.24
  13   5  -4    0.15    0.24
  13  -5  -4    0.06    0.24
 -13  -5   4    0.12    0.23
  12   5  -4    0.21    0.26
  12  -5  -4    0.16    0.23
 -12  -5   4    0.18    0.21
  11  -5  -4    1.32    0.34
  11   5  -4    1.08    0.32
 -11  -5   4    1.72    0.31
  10  -5  -4    1.94    0.38
  10   5  -4    2.11    0.41
 -10  -5   4    2.28    0.32
   9  -5  -4    2.66    0.40
   9   5  -4    2.93    0.45
  -9  -5   4    2.80    0.34
   8   5  -4    9.48    0.71
  -8  -5   4    9.53    0.53
   8  -5  -4    8.57    0.63
   7  -5  -4    4.13    0.42
   7   5  -4    4.22    0.52
  -7  -5   4    4.00    0.34
   6  -5  -4    3.19    0.37
   6   5  -4    3.54    0.47
  -6  -5   4    2.86    0.28
   5   5  -4   12.23    0.80
  -5  -5   4   13.19    0.51
   5  -5  -4   13.50    0.67
   4  -5  -4    7.51    0.53
   4  -5  -4    8.65    0.71
   4   5  -4    9.43    0.71
  -4  -5   4    8.31    0.37
   3  -5  -4    2.41    0.28
   3  -5  -4    2.61    0.42
   3  -5  -4    2.84    0.40
   3   5  -4    2.17    0.38
  -3  -5   4    2.48    0.19
   2   5  -4    6.13    0.56
   2  -5  -4    6.17    0.59
   2  -5  -4    6.45    0.42
   2  -5  -4    6.34    0.59
   1   5  -4   14.50    0.83
   1  -5  -4   14.17    0.88
   1  -5  -4   15.11    0.58
   1  -5  -4   13.46    0.82
   0  -5  -4    1.05    0.30
   0  -5  -4    0.53    0.23
   0  -5   4    0.63    0.12
   0   5  -4    0.14    0.23
   0  -5  -4    0.78    0.15
  -1  -5  -4    0.12    0.18
  -1  -5  -4    0.10    0.20
  -1  -5  -4    0.13    0.08
   1   5   4    0.25    0.19
  -1   5  -4   -0.25    0.27
  -2  -5  -4    2.69    0.41
   2   5   4    2.44    0.33
  -2   5  -4    2.62    0.41
  -2  -5  -4    2.01    0.35
  -3   5  -4    2.68    0.39
  -3  -5  -4    2.87    0.43
   3   5   4    3.04    0.36
  -3  -5  -4    2.83    0.41
  -4  -5  -4    1.70    0.37
  -4   5  -4    2.19    0.37
   4   5   4    2.34    0.32
  -4  -5  -4    1.86    0.36
  -5  -5  -4    1.74    0.35
   5   5   4    2.58    0.34
  -5  -5  -4    2.30    0.38
  -6  -5  -4    0.81    0.30
   6   5   4    1.04    0.26
  -6  -5  -4    0.63    0.19
  -7  -5  -4    0.74    0.29
   7   5   4    0.61    0.20
  -7  -5  -4    0.64    0.23
  -8  -5  -4    2.02    0.41
   8   5   4    1.92    0.31
  -8  -5  -4    2.30    0.39
  -9  -5  -4    3.35    0.52
   9   5   4    3.51    0.38
  -9  -5  -4    4.30    0.51
 -10  -5  -4    0.20    0.29
  10   5   4    0.21    0.17
 -10  -5  -4    0.57    0.28
 -11  -5  -4    0.67    0.34
 -11  -5  -4    0.58    0.28
 -12  -5  -4   -0.53    0.39
 -12  -5  -4    0.32    0.29
 -13  -5  -4   -0.76    0.43
 -13  -5  -4   -0.11    0.23
  13  -5   4   -0.33    0.41
 -14  -5  -4   -0.21    0.36
  14  -5   4   -0.03    0.39
 -14  -5  -4    0.29    0.29
 -15  -5  -4    1.25    0.48
  16   6  -4    0.04    0.32
  15   6  -4    0.37    0.31
  15  -6  -4    0.68    0.35
  14  -6  -4    0.17    0.29
  14   6  -4   -0.21    0.29
  13   6  -4    0.00    0.29
  13  -6  -4    0.54    0.37
  12   6  -4    1.93    0.45
  12  -6  -4    2.05    0.42
  11   6  -4    0.16    0.30
  11  -6  -4    1.03    0.35
  10   6  -4    0.56    0.32
  10  -6  -4    0.57    0.28
   9   6  -4    3.45    0.53
   9  -6  -4    3.14    0.45
   8  -6  -4    1.07    0.31
   8   6  -4    0.85    0.31
   7   6  -4   -0.02    0.26
   7  -6  -4    0.01    0.20
   6  -6  -4    0.18    0.21
   6   6  -4   -0.26    0.32
   6  -6  -4    0.08    0.23
   5  -6  -4    1.29    0.40
   5   6  -4    1.10    0.31
   5  -6  -4    1.48    0.30
   5  -6  -4    1.34    0.31
   4  -6  -4    0.62    0.27
   4  -6  -4    1.03    0.33
   4   6  -4    0.26    0.24
   4  -6  -4    0.85    0.25
   3  -6  -4    0.87    0.35
   3  -6  -4    0.82    0.28
   3  -6  -4    0.85    0.21
   3   6  -4    0.88    0.28
   2  -6  -4   -0.01    0.23
   2  -6  -4   -0.20    0.22
   2   6  -4   -0.15    0.28
   1  -6  -4    0.35    0.26
   1  -6  -4    0.02    0.22
   1   6  -4    0.29    0.29
   0  -6  -4   -0.26    0.28
   0  -6  -4    0.06    0.23
   0   6  -4   -0.34    0.31
  -1   6  -4    0.76    0.33
  -1  -6  -4    0.49    0.27
  -1  -6  -4    0.64    0.26
  -2  -6  -4    3.29    0.47
   2   6   4    3.29    0.43
  -2   6  -4    3.96    0.52
  -2  -6  -4    3.54    0.48
  -3  -6  -4    0.40    0.26
   3   6   4    0.83    0.26
  -3   6  -4    0.72    0.30
  -3  -6  -4    0.34    0.25
  -4  -6  -4    0.41    0.28
   4   6   4    0.70    0.27
  -4  -6  -4    0.89    0.31
  -4   6  -4    0.66    0.34
  -5  -6  -4    2.89    0.47
   5   6   4    2.87    0.39
  -5  -6  -4    2.62    0.40
   6   6   4    2.73    0.41
  -6  -6  -4    2.05    0.44
  -6  -6  -4    2.51    0.42
  -7  -6  -4    2.17    0.45
   7   6   4    2.02    0.33
  -8  -6  -4    1.32    0.39
   8   6   4    1.12    0.29
  -9  -6  -4    2.89    0.53
 -10  -6  -4    0.59    0.33
 -11  -6  -4    0.20    0.31
 -12  -6  -4   -0.30    0.34
  12  -7  -4    1.35    0.39
  11  -7  -4    1.36    0.42
  10  -7  -4    0.48    0.31
   9   7  -4    0.11    0.34
   9  -7  -4    0.03    0.26
   8   7  -4    0.43    0.32
   8  -7  -4    0.90    0.30
   7   7  -4    0.02    0.31
   6   7  -4    0.18    0.27
   5   7  -4    0.08    0.32
   4   7  -4   -0.12    0.35
   3   7  -4    0.96    0.38
   2   7  -4    0.12    0.31
   1   7  -4   -0.16    0.35
   0   7  -4   -0.17    0.32
  -1   7  -4    0.83    0.42
  -2   7  -4    0.96    0.42
   4   7   4    0.21    0.28
  -5  -7  -4   -0.13    0.28
   5   7   4    0.46    0.28
  -6  -7  -4    0.21    0.32
   6   7   4    0.17    0.25
  -7  -7  -4    0.50    0.34
  -8  -7  -4    0.16    0.30
  -9  -7  -4   -0.65    0.43
 -10  -7  -4   -0.56    0.42
  25   0  -5   -0.04    0.27
  24   0  -5    0.46    0.30
 -23   0   5    0.16    0.33
  23   0  -5    0.08    0.25
 -22   0   5    0.34    0.29
  22   0  -5    0.01    0.27
 -21   0   5    0.19    0.29
  21   0  -5    0.28    0.23
 -20   0   5    0.16    0.26
  20   0  -5    0.31    0.25
 -19   0   5    0.11    0.25
  19   0  -5    0.27    0.22
 -18   0   5   -0.15    0.22
  18   0  -5   -0.15    0.19
 -17   0   5    0.40    0.23
  17   0  -5    0.07    0.18
 -16   0   5    0.21    0.23
  16   0  -5    0.29    0.18
 -15   0   5    0.15    0.20
  15   0  -5    0.21    0.17
 -14   0   5   -0.06    0.15
  14   0  -5    0.09    0.14
 -13   0   5    0.01    0.15
  13   0  -5    0.33    0.20
 -12   0   5   -0.01    0.16
  12   0  -5    0.08    0.15
  11   0  -5    0.04    0.10
 -11   0   5    0.17    0.14
 -10   0   5    0.26    0.14
  10   0  -5    0.17    0.14
   9   0  -5   -0.02    0.11
   9   0  -5    0.07    0.10
  -9   0   5   -0.07    0.11
  -9   0   5    0.04    0.09
  -8   0   5    0.05    0.10
  -8   0   5   -0.03    0.07
   8   0  -5    0.03    0.07
   8   0  -5    0.12    0.11
   7   0  -5    0.01    0.09
   7   0  -5    0.09    0.07
  -7   0   5    0.01    0.09
  -7   0   5    0.01    0.08
  -6   0   5   -0.07    0.09
   6   0  -5   -0.14    0.09
   6   0  -5    0.06    0.09
  -6   0   5    0.02    0.07
   5   0  -5   -0.01    0.08
  -5   0   5    0.07    0.08
   5   0  -5    0.21    0.08
   4   0  -5   -0.02    0.07
  -4   0   5    0.11    0.07
   4   0  -5   -0.01    0.07
  -3   0   5   -0.02    0.07
   3   0  -5    0.16    0.11
   3   0  -5   -0.01    0.07
   2   0  -5    0.03    0.08
  -2   0   5   -0.07    0.07
   1   0  -5   -0.06    0.08
  -1   0   5   -0.01    0.08
   0   0   5    0.15    0.09
   0   0  -5    0.04    0.07
   0   0  -5    0.13    0.05
   0   0  -5    0.08    0.09
   1   0   5   -0.07    0.11
  -1   0  -5   -0.01    0.08
  -1   0  -5    0.03    0.04
  -1   0  -5    0.08    0.10
  -2   0  -5   -0.08    0.09
   2   0   5    0.01    0.08
   2   0   5    0.03    0.03
  -2   0  -5   -0.05    0.11
  -2   0  -5    0.02    0.03
   2   0   5   -0.02    0.09
  -3   0  -5   -0.02    0.09
   3   0   5   -0.02    0.03
   3   0   5    0.04    0.10
   3   0   5    0.13    0.10
  -3   0  -5    0.00    0.10
  -4   0  -5   -0.01    0.11
   4   0   5    0.00    0.09
   4   0   5    0.00    0.03
  -4   0  -5    0.08    0.12
   4   0   5    0.02    0.10
  -5   0  -5    0.18    0.15
  -5   0  -5   -0.03    0.12
   5   0   5    0.06    0.09
   5   0   5    0.00    0.04
  -6   0  -5    0.15    0.17
   6   0   5   -0.01    0.05
  -6   0  -5    0.05    0.11
   6   0   5   -0.04    0.10
  -7   0  -5   -0.16    0.18
  -7   0  -5    0.09    0.17
   7   0   5    0.04    0.06
  -8   0  -5    0.14    0.15
  -8   0  -5    0.35    0.22
   8   0   5    0.07    0.06
  -9   0  -5    0.11    0.15
   9   0   5    0.07    0.08
  -9   0  -5    0.28    0.22
 -10   0  -5    0.04    0.16
 -11   0  -5    0.12    0.21
  11   0   5   -0.04    0.15
 -12   0  -5    0.11    0.19
  12   0   5   -0.13    0.20
  13   0   5   -0.21    0.19
 -13   0  -5   -0.26    0.24
  14   0   5   -0.16    0.19
 -14   0  -5    0.13    0.25
  15   0   5    0.27    0.22
 -15   0  -5    0.42    0.27
  16   0   5    0.11    0.19
 -16   0  -5    0.11    0.24
  17   0   5    0.23    0.24
 -17   0  -5    0.42    0.31
  18   0   5    0.35    0.26
 -18   0  -5    0.46    0.31
  19   0   5    0.65    0.30
 -19   0  -5    0.71    0.39
  25   1  -5    0.58    0.30
  24   1  -5   -0.45    0.26
  24  -1  -5    0.70    0.36
  23   1  -5    0.99    0.34
 -23  -1   5    0.42    0.32
  23  -1  -5    1.06    0.37
 -23   1   5    0.53    0.35
 -22  -1   5    0.34    0.29
  22   1  -5    0.28    0.23
 -22   1   5   -0.10    0.24
  22  -1  -5    0.16    0.28
 -21  -1   5    0.08    0.27
  21  -1  -5    0.13    0.26
  21   1  -5    0.18    0.21
 -21   1   5    0.17    0.27
 -20   1   5    0.56    0.31
 -20  -1   5    0.48    0.30
  20   1  -5    0.54    0.24
  20  -1  -5    1.11    0.33
 -19  -1   5    1.47    0.33
 -19   1   5    0.92    0.31
  19   1  -5    1.48    0.29
  19  -1  -5    1.52    0.34
  18  -1  -5    0.48    0.25
  18   1  -5    0.12    0.17
 -18   1   5    0.38    0.29
 -18  -1   5    0.15    0.22
  17  -1  -5    0.05    0.20
 -17   1   5    0.59    0.28
  17   1  -5   -0.02    0.17
 -17  -1   5    0.55    0.26
 -16  -1   5    2.03    0.33
  16  -1  -5    2.08    0.34
  16   1  -5    1.72    0.28
 -16   1   5    1.79    0.32
  15  -1  -5    0.63    0.22
 -15  -1   5    0.65    0.24
 -15   1   5    0.44    0.23
  15   1  -5    0.78    0.22
  14  -1  -5    0.26    0.19
 -14  -1   5    0.03    0.15
  14   1  -5    0.40    0.18
 -14   1   5    0.12    0.18
  13  -1  -5   11.17    0.62
 -13   1   5   11.05    0.62
 -13  -1   5   11.31    0.61
  13   1  -5   11.23    0.56
 -12   1   5   10.81    0.60
 -12  -1   5   11.61    0.59
  12  -1  -5   11.33    0.60
  12   1  -5   11.48    0.55
  11  -1  -5    1.07    0.22
 -11   1   5    1.25    0.22
  11   1  -5    1.56    0.22
 -11  -1   5    1.36    0.21
  10  -1  -5    2.81    0.30
 -10  -1   5    2.83    0.27
  10   1  -5    2.97    0.28
 -10   1   5    2.29    0.27
   9  -1  -5    1.74    0.23
  -9   1   5    1.78    0.23
   9   1  -5    1.44    0.20
  -9  -1   5    1.47    0.19
  -9  -1   5    2.21    0.25
   9   1  -5    1.73    0.23
   8  -1  -5   73.24    1.31
  -8  -1   5   74.02    1.26
   8  -1  -5   77.33    1.27
   8   1  -5   73.63    1.25
  -8   1   5   74.84    1.35
   8   1  -5   75.29    1.27
  -8   1   5   77.32    1.35
  -8  -1   5   75.38    1.15
  -7  -1   5   18.39    0.53
   7   1  -5   17.45    0.61
  -7  -1   5   18.38    0.61
   7  -1  -5   19.23    0.60
   7  -1  -5   18.79    0.65
  -7   1   5   17.97    0.63
   7   1  -5   19.21    0.60
   6   1  -5    0.61    0.13
  -6   1   5    0.66    0.13
  -6  -1   5    0.57    0.10
   6   1  -5    0.74    0.11
  -6  -1   5    0.63    0.13
   6  -1  -5    1.18    0.18
   6  -1  -5    0.89    0.14
   5  -1  -5    2.24    0.23
  -5  -1   5    2.40    0.17
  -5  -1   5    2.35    0.22
  -5   1   5    2.36    0.21
   5  -1  -5    2.38    0.21
   5   1  -5    2.46    0.18
   4  -1  -5   51.66    0.85
  -4   1   5   52.95    0.91
  -4  -1   5   51.83    0.99
   4   1  -5   49.37    0.85
   4   1  -5   52.76    0.71
   3   1  -5   11.99    0.32
   3  -1  -5   12.62    0.40
   3   1  -5   12.43    0.41
  -3   1   5   11.96    0.40
   3   1  -5   12.51    0.43
   2  -1  -5    9.74    0.33
   2   1  -5    9.58    0.37
   2   1  -5    9.43    0.36
  -2   1   5    9.93    0.35
   2  -1  -5    9.84    0.53
  -2  -1   5   10.06    0.37
   1  -1  -5    0.12    0.06
  -1  -1   5    0.29    0.09
   1  -1  -5    0.17    0.12
  -1   1   5    0.12    0.10
  -1   1   5    0.25    0.07
   1   1  -5    0.23    0.08
  -1  -1   5    0.19    0.07
   1   1  -5    0.27    0.08
   0   1   5   26.49    0.87
   0   1  -5   27.23    0.64
   0   1  -5   26.84    0.60
   0   1   5   26.19    0.53
   0  -1   5   26.69    0.55
   0  -1   5   26.65    0.65
   0  -1  -5   28.21    0.89
   0   1  -5   27.23    0.53
   0  -1  -5   26.65    0.81
   1   1   5    1.81    0.24
  -1   1  -5    1.26    0.13
   1   1   5    1.40    0.12
  -1  -1  -5    1.32    0.07
   1  -1   5    1.34    0.13
  -1   1  -5    1.39    0.15
  -1   1  -5    1.30    0.16
  -1  -1  -5    1.21    0.20
   1  -1   5    1.21    0.16
  -1  -1  -5    1.51    0.24
   2   1   5    3.47    0.33
  -2   1  -5    3.70    0.27
   2  -1   5    3.24    0.20
  -2  -1  -5    3.23    0.32
   2  -1   5    3.41    0.27
  -2   1  -5    3.17    0.22
  -2   1  -5    3.06    0.20
  -2  -1  -5    2.74    0.28
   2  -1   5    2.97    0.21
   2   1   5    3.54    0.31
  -3   1  -5   24.66    0.56
   3  -1   5   24.49    0.56
   3  -1   5   25.61    0.76
  -3  -1  -5   26.28    0.86
   3   1   5   24.92    0.84
   3   1   5   25.26    0.89
  -3   1  -5   25.07    0.74
  -3   1  -5   24.67    0.63
  -3  -1  -5   23.77    0.80
   3  -1   5   25.05    0.65
  -4   1  -5    1.95    0.20
  -4  -1  -5    2.28    0.28
   4  -1   5    2.40    0.18
  -4   1  -5    2.44    0.26
   4   1   5    2.39    0.28
   4  -1   5    2.18    0.24
  -4  -1  -5    2.51    0.29
   4  -1   5    2.33    0.23
   4   1   5    2.27    0.29
   5  -1   5   36.57    0.74
  -5  -1  -5   36.53    1.08
   5  -1   5   36.97    1.02
  -5   1  -5   36.42    0.87
  -5  -1  -5   37.19    1.09
   5  -1   5   36.08    0.90
  -5   1  -5   36.01    0.99
  -6   1  -5    0.62    0.15
  -6  -1  -5    0.53    0.18
   6  -1   5    0.75    0.16
   6   1   5    0.71    0.06
   6  -1   5    0.81    0.13
  -6  -1  -5    0.47    0.18
  -7   1  -5    0.93    0.21
   7  -1   5    0.69    0.18
  -7  -1  -5    0.76    0.24
   7   1   5    0.84    0.08
   7  -1   5    0.77    0.13
  -7  -1  -5    0.87    0.23
  -8   1  -5    4.22    0.36
  -8  -1  -5    4.52    0.45
   8  -1   5    4.00    0.29
  -8  -1  -5    4.21    0.44
  -9  -1  -5    3.88    0.42
  -9   1  -5    4.27    0.39
  -9  -1  -5    3.93    0.45
   9  -1   5    4.44    0.32
   9   1   5    5.08    0.33
 -10  -1  -5   -0.10    0.23
  10   1   5    0.13    0.11
  10  -1   5    0.19    0.12
 -10  -1  -5   -0.13    0.21
 -11  -1  -5    0.19    0.20
 -11  -1  -5    0.64    0.28
  11   1   5    0.17    0.12
 -11   1  -5    0.68    0.23
  12   1   5    7.71    0.48
 -12   1  -5    7.91    0.60
 -12  -1  -5    7.82    0.64
 -13  -1  -5    0.43    0.31
  13   1   5    0.19    0.14
  13  -1   5    0.18    0.19
 -13   1  -5    0.05    0.21
 -14  -1  -5    0.98    0.33
  14  -1   5    1.01    0.28
 -14   1  -5    1.24    0.33
  14   1   5    1.44    0.26
 -15  -1  -5    0.12    0.29
  15  -1   5   -0.02    0.23
  15   1   5    0.15    0.19
 -15   1  -5    0.34    0.25
  16   1   5   -0.11    0.18
 -16   1  -5    0.48    0.30
  16  -1   5   -0.04    0.24
 -16  -1  -5    0.53    0.34
  17  -1   5    0.03    0.22
 -17  -1  -5    0.12    0.34
 -18   1  -5    0.10    0.26
  18  -1   5    0.55    0.30
 -18  -1  -5    0.04    0.31
  19  -1   5    0.81    0.35
 -19   1  -5    0.36    0.33
 -19  -1  -5    0.81    0.37
  20  -1   5    0.09    0.28
  21  -1   5    0.63    0.37
  23  -2  -5    0.21    0.25
 -23  -2   5    0.03    0.25
  22   2  -5    0.48    0.26
  22  -2  -5    0.02    0.23
 -22   2   5    0.06    0.33
 -22  -2   5    0.26    0.28
 -21   2   5    0.26    0.32
  21  -2  -5    0.25    0.27
  21   2  -5   -0.20    0.19
 -21  -2   5   -0.09    0.24
 -20  -2   5    0.08    0.25
  20  -2  -5    0.29    0.24
  20   2  -5    0.15    0.21
 -20   2   5    0.26    0.30
  19  -2  -5   -0.03    0.19
 -19   2   5    0.15    0.28
 -19  -2   5   -0.52    0.28
  19   2  -5    0.13    0.17
 -18   2   5    0.47    0.26
 -18  -2   5    0.57    0.27
  18  -2  -5    0.50    0.27
  18   2  -5    0.30    0.18
  17  -2  -5   -0.08    0.21
 -17   2   5    0.20    0.24
 -17  -2   5    0.26    0.20
  17   2  -5   -0.15    0.16
 -16   2   5    0.29    0.22
  16   2  -5    0.47    0.20
  16  -2  -5    0.36    0.25
 -16  -2   5    0.43    0.24
 -15   2   5   10.64    0.70
  15   2  -5   10.41    0.60
  15  -2  -5   10.35    0.68
 -15  -2   5   10.79    0.64
  14   2  -5    0.07    0.14
 -14   2   5    0.28    0.20
  14  -2  -5    0.14    0.21
 -14  -2   5    0.39    0.19
  13   2  -5    0.05    0.14
  13  -2  -5    0.12    0.15
 -13  -2   5    0.18    0.18
 -13   2   5    0.22    0.20
 -12   2   5    7.61    0.55
 -12  -2   5    6.83    0.44
  12   2  -5    6.65    0.44
  12   2  -5    6.34    0.45
  12  -2  -5    7.00    0.51
  11   2  -5    0.51    0.16
 -11   2   5    0.01    0.17
  11  -2  -5    0.42    0.19
  11   2  -5    0.51    0.14
 -11  -2   5    0.59    0.17
  10  -2  -5    5.89    0.44
 -10  -2   5    6.02    0.38
  10   2  -5    5.89    0.41
  10   2  -5    5.93    0.35
  10   2  -5    5.88    0.42
  -9  -2   5    5.19    0.32
   9  -2  -5    4.87    0.38
  -9  -2   5    5.38    0.36
   9   2  -5    5.29    0.38
   9   2  -5    5.09    0.38
   9   2  -5    5.04    0.30
  -8  -2   5   19.56    0.68
   8   2  -5   19.30    0.71
   8  -2  -5   22.03    0.72
  -8  -2   5   19.77    0.58
   8   2  -5   20.30    0.68
   7   2  -5    0.15    0.09
  -7   2   5    0.17    0.12
   7  -2  -5    0.02    0.12
  -7  -2   5    0.13    0.08
   7   2  -5    0.26    0.13
  -7  -2   5    0.08    0.09
   6   2  -5   56.52    0.95
   6  -2  -5   52.87    1.18
  -6  -2   5   55.29    0.79
  -6  -2   5   52.10    1.10
   6   2  -5   56.31    1.15
   6  -2  -5   56.24    1.06
  -6   2   5   54.17    1.14
  -5  -2   5    4.32    0.20
  -5  -2   5    4.62    0.33
   5   2  -5    4.72    0.35
   5   2  -5    4.22    0.17
   5  -2  -5    4.54    0.29
   5   2  -5    4.43    0.25
  -5   2   5    4.56    0.32
   4  -2  -5    1.01    0.14
   4   2  -5    1.06    0.11
  -4   2   5    1.06    0.15
   4   2  -5    1.15    0.18
  -4  -2   5    1.30    0.17
  -4  -2   5    1.04    0.09
   3  -2  -5    1.03    0.23
   3   2  -5    0.89    0.08
   3   2  -5    1.13    0.19
  -3   2   5    0.72    0.13
  -3  -2   5    0.98    0.16
   3  -2  -5    0.85    0.14
   2  -2  -5   29.94    0.66
   2  -2  -5   29.92    0.59
   2   2  -5   31.16    0.42
  -2  -2   5   29.61    0.48
   2  -2  -5   30.82    1.02
  -2  -2   5   28.82    0.72
  -2   2   5   30.51    0.66
   2   2  -5   30.71    0.81
   1   2  -5    4.71    0.33
  -1  -2   5    4.44    0.29
   1  -2  -5    4.74    0.22
  -1  -2   5    4.57    0.22
   1  -2  -5    4.52    0.25
   1  -2  -5    4.32    0.40
  -1   2   5    5.08    0.25
   0  -2   5    3.75    0.27
   0  -2  -5    4.27    0.40
   0  -2   5    3.81    0.23
   0  -2  -5    3.61    0.19
   0  -2  -5    3.79    0.22
   0   2  -5    3.89    0.30
   0   2   5    3.44    0.37
   0   2   5    4.03    0.19
   0  -2  -5    4.35    0.38
   1  -2   5   10.07    0.44
  -1   2  -5    9.35    0.44
  -1  -2  -5    9.46    0.33
   1  -2   5    9.94    0.40
  -1  -2  -5   10.15    0.59
   1   2   5   10.12    0.62
   1   2   5    9.84    0.27
  -1   2  -5    9.49    0.20
  -1  -2  -5   10.03    0.57
  -2   2  -5   35.79    0.86
   2  -2   5   35.87    0.81
   2  -2   5   36.26    0.84
  -2  -2  -5   36.23    0.59
  -2  -2  -5   38.89    1.14
   2   2   5   36.37    1.17
   2   2   5   36.22    0.44
  -2   2  -5   37.56    0.51
  -2  -2  -5   37.30    1.09
   2  -2   5   36.31    0.55
   3   2   5   38.52    0.58
  -3   2  -5   37.11    0.89
   3  -2   5   38.49    0.89
  -3  -2  -5   39.35    0.57
  -3  -2  -5   39.44    1.17
   3   2   5   37.63    0.39
   3  -2   5   39.59    0.91
  -3   2  -5   39.69    0.62
  -3  -2  -5   38.15    1.13
   3  -2   5   40.03    0.68
   4  -2   5    3.50    0.29
  -4   2  -5    3.48    0.29
   4   2   5    3.63    0.18
  -4  -2  -5    4.04    0.40
  -4   2  -5    3.60    0.23
   4  -2   5    3.48    0.23
  -4  -2  -5    3.76    0.39
   4  -2   5    3.56    0.31
  -5  -2  -5    2.86    0.34
   5   2   5    3.63    0.18
   5  -2   5    3.08    0.27
   5  -2   5    3.84    0.33
  -5   2  -5    3.44    0.25
  -5  -2  -5    2.97    0.36
   5  -2   5    3.71    0.27
   5   2   5    2.86    0.12
   6   2   5    4.42    0.20
   6  -2   5    4.43    0.34
  -6  -2  -5    4.95    0.45
  -6   2  -5    4.83    0.31
   6   2   5    3.96    0.15
  -6  -2  -5    5.22    0.48
   6  -2   5    4.63    0.32
  -7  -2  -5    0.14    0.20
  -7  -2  -5    0.37    0.25
   7  -2   5    0.06    0.10
   7   2   5    0.09    0.06
   7   2   5    0.15    0.05
  -7   2  -5    0.20    0.14
   8   2   5    7.94    0.30
  -8  -2  -5    7.71    0.58
   8   2   5    7.85    0.27
  -8   2  -5    8.28    0.47
  -8  -2  -5    8.21    0.63
   8  -2   5    8.25    0.50
   9   2   5   14.31    0.41
  -9  -2  -5   14.47    0.80
   9   2   5   13.59    0.39
  -9  -2  -5   14.37    0.83
 -10  -2  -5    1.31    0.27
  10   2   5    1.49    0.16
  10   2   5    1.66    0.16
 -10  -2  -5    1.89    0.36
  11   2   5    0.05    0.08
 -11  -2  -5    0.35    0.24
  11   2   5    0.15    0.08
 -12  -2  -5   -0.03    0.23
 -12   2  -5    0.07    0.17
 -12  -2  -5    0.16    0.23
  12   2   5    0.07    0.09
  12   2   5    0.03    0.09
 -13  -2  -5    5.17    0.60
 -13   2  -5    4.10    0.45
  13   2   5    4.28    0.29
 -13  -2  -5    4.57    0.56
 -14  -2  -5    0.11    0.23
 -14   2  -5    0.07    0.22
  14  -2   5    0.13    0.23
 -15  -2  -5    0.70    0.36
  15  -2   5    0.86    0.33
 -15   2  -5    0.53    0.28
 -16  -2  -5    0.96    0.39
  16  -2   5    0.23    0.26
 -16   2  -5    0.71    0.31
 -17  -2  -5    0.31    0.31
  17  -2   5    0.13    0.27
 -17   2  -5    0.39    0.26
 -18   2  -5    0.47    0.31
  18  -2   5    1.19    0.38
 -18  -2  -5    0.92    0.44
 -19   2  -5   -0.26    0.33
  19  -2   5    0.20    0.36
  20  -2   5    0.10    0.27
 -23  -3   5   -0.03    0.28
  23   3  -5    0.28    0.34
 -22   3   5   -0.35    0.33
 -22  -3   5    0.40    0.29
  22   3  -5    0.50    0.32
  21   3  -5    0.87    0.34
 -21   3   5    0.39    0.25
  21  -3  -5    0.17    0.27
 -21  -3   5    0.43    0.28
  20  -3  -5    0.20    0.29
 -20   3   5    1.10    0.34
 -20  -3   5    0.48    0.27
  20   3  -5    1.34    0.39
 -19   3   5   -0.33    0.32
 -19  -3   5    0.22    0.24
  19   3  -5    0.47    0.26
  19  -3  -5    0.18    0.26
  19   3  -5    0.05    0.18
  18  -3  -5   -0.11    0.29
 -18  -3   5    0.31    0.21
 -18   3   5   -0.01    0.23
  18   3  -5    1.01    0.36
  18   3  -5    0.58    0.23
  17   3  -5    7.56    0.66
  17  -3  -5    5.52    0.58
 -17  -3   5    5.94    0.54
 -17   3   5    6.18    0.62
  16  -3  -5    2.08    0.37
 -16   3   5    1.76    0.36
 -16  -3   5    2.30    0.35
  16   3  -5    2.29    0.38
 -15  -3   5   13.02    0.71
 -15   3   5   11.51    0.77
  15   3  -5   12.22    0.77
  15  -3  -5   11.34    0.77
 -14  -3   5    1.36    0.26
  14  -3  -5    2.06    0.35
  14   3  -5    1.48    0.32
 -13  -3   5    0.27    0.17
  13   3  -5    0.49    0.26
  13   3  -5    0.23    0.15
  13  -3  -5   -0.07    0.18
 -12  -3   5    3.86    0.35
  12  -3  -5    3.01    0.36
  12   3  -5    2.86    0.38
  12   3  -5    2.96    0.29
  11   3  -5    4.40    0.33
  11  -3  -5    5.01    0.45
 -11  -3   5    5.39    0.39
  11   3  -5    4.80    0.46
  10   3  -5    4.65    0.44
  10   3  -5    4.57    0.30
  10  -3  -5    4.02    0.39
 -10  -3   5    4.17    0.32
  -9  -3   5    9.84    0.45
   9   3  -5   10.03    0.60
   9   3  -5    9.69    0.38
   9   3  -5   10.11    0.56
   9  -3  -5    9.38    0.55
   8   3  -5    0.78    0.21
   8   3  -5    0.69    0.16
  -8  -3   5    0.71    0.13
   8  -3  -5    0.67    0.16
   8   3  -5    0.74    0.10
  -7  -3   5    6.60    0.31
   7  -3  -5    6.46    0.41
   7   3  -5    6.29    0.47
   7   3  -5    6.33    0.39
  -6  -3   5    3.33    0.20
   6   3  -5    3.75    0.38
   6   3  -5    3.34    0.26
   6  -3  -5    3.11    0.29
  -5  -3   5   44.56    0.57
   5   3  -5   44.43    0.82
   5   3  -5   44.44    1.18
   5  -3  -5   45.58    0.98
   4   3  -5   11.95    0.61
   4  -3  -5   11.64    0.48
  -4  -3   5   11.19    0.21
   4   3  -5   12.14    0.36
   3  -3  -5    0.27    0.10
   3  -3  -5    0.37    0.22
   3  -3  -5    0.24    0.11
   3   3  -5    0.24    0.15
   2  -3  -5    1.40    0.16
   2   3  -5    1.66    0.26
   2  -3  -5    1.52    0.20
   2  -3  -5    1.83    0.30
   1  -3  -5   28.53    1.09
   1   3  -5   30.05    0.95
  -1  -3   5   28.57    0.46
   1  -3  -5   28.18    0.59
   1  -3  -5   27.92    0.78
   1  -3  -5   29.66    1.07
   0   3  -5   13.52    0.64
   0  -3  -5   12.72    0.52
   0  -3  -5   13.07    0.75
   0  -3   5   12.72    0.38
   0  -3  -5   13.44    0.36
   0  -3  -5   13.18    0.70
   1  -3   5    6.72    0.32
  -1  -3  -5    6.04    0.52
  -1   3  -5    6.05    0.43
  -1  -3  -5    6.49    0.22
  -1  -3  -5    6.32    0.36
  -1  -3  -5    6.36    0.51
   2   3   5   16.70    0.53
  -2   3  -5   15.59    0.68
   2  -3   5   15.90    0.54
  -2  -3  -5   15.09    0.80
  -2   3  -5   16.10    0.35
  -2  -3  -5   16.22    0.53
  -2  -3  -5   16.44    0.81
  -3  -3  -5    0.27    0.20
   3  -3   5    0.16    0.04
   3   3   5    0.23    0.10
  -3   3  -5    0.17    0.16
  -3   3  -5    0.13    0.06
  -3  -3  -5    0.12    0.07
   3  -3   5    0.22    0.10
  -3  -3  -5    0.15    0.19
  -4   3  -5    2.85    0.21
  -4  -3  -5    2.98    0.38
   4  -3   5    2.87    0.28
   4   3   5    2.77    0.23
  -4  -3  -5    2.70    0.22
  -4   3  -5    2.96    0.31
   4  -3   5    3.05    0.19
  -4  -3  -5    2.97    0.38
  -5   3  -5   12.04    0.45
  -5   3  -5   12.75    0.62
   5   3   5   11.41    0.44
  -5  -3  -5   11.00    0.40
   5  -3   5   11.24    0.42
  -5  -3  -5   10.71    0.70
  -5  -3  -5   10.86    0.68
   6   3   5    9.43    0.40
  -6  -3  -5    9.57    0.64
   6  -3   5    9.71    0.43
  -6  -3  -5    9.41    0.67
  -6   3  -5    9.63    0.45
   7  -3   5    0.98    0.18
  -7  -3  -5    0.93    0.30
   7   3   5    0.81    0.14
  -7  -3  -5    1.31    0.29
  -7   3  -5    0.96    0.19
  -8  -3  -5    0.71    0.27
   8  -3   5    0.63    0.17
  -8   3  -5    0.59    0.17
   8   3   5    0.73    0.13
  -8  -3  -5    0.97    0.27
  -9  -3  -5    8.28    0.65
   9   3   5    8.39    0.40
  -9  -3  -5    9.38    0.72
  -9   3  -5    8.36    0.51
 -10   3  -5    0.22    0.15
 -10  -3  -5    0.82    0.32
  10   3   5    0.43    0.13
 -10  -3  -5    0.43    0.25
 -11  -3  -5    1.11    0.36
 -11   3  -5    1.44    0.27
  11   3   5    1.49    0.20
 -11  -3  -5    1.50    0.34
 -12  -3  -5    0.26    0.26
 -12   3  -5    0.10    0.18
 -12  -3  -5    0.35    0.27
 -13  -3  -5    0.25    0.26
 -13   3  -5    0.91    0.29
 -13  -3  -5    0.85    0.35
 -14  -3  -5    0.27    0.33
 -14   3  -5    0.24    0.23
 -14  -3  -5    0.00    0.25
  14  -3   5   -0.26    0.30
 -15  -3  -5    0.54    0.31
 -15   3  -5    0.14    0.21
  15  -3   5    0.42    0.33
 -16   3  -5    0.28    0.27
  16  -3   5   -0.16    0.33
 -17  -3  -5    0.16    0.34
 -17   3  -5    0.26    0.29
  17  -3   5    0.15    0.25
  18  -3   5    0.48    0.34
 -18   3  -5    0.51    0.32
 -19   3  -5    0.30    0.30
 -22  -4   5   -0.13    0.28
  22   4  -5    0.43    0.34
 -21  -4   5   -0.26    0.28
  21   4  -5   -0.64    0.39
 -20  -4   5    0.25    0.29
  20   4  -5    0.27    0.30
  19   4  -5    2.03    0.44
  19  -4  -5    1.77    0.40
 -19  -4   5    2.11    0.40
 -18  -4   5    0.32    0.25
  18  -4  -5   -0.17    0.30
  18   4  -5    0.37    0.29
  17  -4  -5    0.40    0.22
  17   4  -5    0.86    0.30
 -17  -4   5    1.14    0.29
 -16  -4   5    0.41    0.23
  16  -4  -5   -0.10    0.26
  16   4  -5   -0.30    0.29
  15  -4  -5    2.24    0.43
 -15  -4   5    3.08    0.39
  15   4  -5    2.62    0.45
 -14  -4   5    0.17    0.18
  14  -4  -5    0.11    0.24
  14   4  -5   -0.25    0.30
  13   4  -5    0.30    0.25
 -13  -4   5    0.40    0.18
  13  -4  -5    0.27    0.18
  12  -4  -5   -0.47    0.27
 -12  -4   5    0.12    0.16
  12   4  -5   -0.16    0.20
 -11  -4   5    0.01    0.13
  11   4  -5   -0.38    0.28
  11  -4  -5   -0.09    0.18
  10   4  -5    0.39    0.24
  10  -4  -5   -0.04    0.17
 -10  -4   5    0.44    0.18
   9  -4  -5    1.78    0.31
   9   4  -5    1.63    0.32
  -9  -4   5    2.07    0.26
   8   4  -5    1.03    0.22
   8   4  -5    0.53    0.25
   8  -4  -5    0.47    0.20
  -8  -4   5    1.01    0.20
  -7  -4   5    6.22    0.30
   7   4  -5    6.37    0.55
   7  -4  -5    6.21    0.45
   7   4  -5    6.52    0.42
   6   4  -5   -0.01    0.09
  -6  -4   5    0.24    0.08
   6   4  -5    0.22    0.21
   6  -4  -5    0.02    0.13
   5   4  -5    0.07    0.09
  -5  -4   5    0.11    0.05
   5   4  -5    0.02    0.17
   5  -4  -5    0.02    0.14
   4  -4  -5    2.31    0.37
   4  -4  -5    2.71    0.27
   4   4  -5    2.51    0.36
   3  -4  -5    0.78    0.25
   3   4  -5    1.36    0.27
   3  -4  -5    0.86    0.15
   2  -4  -5    5.17    0.52
   2   4  -5    4.98    0.48
   2  -4  -5    5.47    0.32
   2  -4  -5    5.39    0.52
   1   4  -5    0.63    0.22
   1  -4  -5    0.81    0.28
   1  -4  -5    0.72    0.14
   1  -4  -5    0.64    0.21
  -1  -4   5    0.73    0.08
  -1  -4   5    0.70    0.07
   0  -4  -5    1.44    0.33
   0  -4  -5    1.61    0.32
   0  -4   5    1.38    0.13
   0   4  -5    1.00    0.25
   0  -4  -5    1.36    0.15
  -1   4  -5   35.36    1.17
   1  -4   5   35.62    0.74
  -1  -4  -5   37.06    1.32
  -1  -4  -5   36.88    0.58
  -1  -4  -5   36.85    1.31
  -2  -4  -5   19.69    0.31
   2   4   5   21.30    0.74
   2  -4   5   20.93    0.64
  -2   4  -5   20.35    0.90
  -2  -4  -5   20.80    1.00
  -2  -4  -5   20.59    0.99
   3   4   5   12.55    0.56
  -3  -4  -5   13.40    0.80
   3  -4   5   13.19    0.55
  -3   4  -5   12.46    0.71
  -3  -4  -5   12.58    0.78
  -4   4  -5   10.74    0.65
   4   4   5   10.32    0.52
   4  -4   5    9.88    0.52
  -4  -4  -5   10.02    0.70
  -4  -4  -5    9.88    0.70
  -5   4  -5    5.57    0.50
  -5  -4  -5    4.86    0.53
   5   4   5    5.54    0.38
  -5  -4  -5    6.13    0.57
  -6   4  -5    4.58    0.33
   6   4   5    3.84    0.32
  -6  -4  -5    4.59    0.54
  -6  -4  -5    4.33    0.48
  -7  -4  -5    0.77    0.32
  -7   4  -5    0.61    0.16
   7   4   5    0.66    0.16
  -7  -4  -5    0.75    0.26
  -8   4  -5   11.35    0.57
  -8  -4  -5   11.51    0.77
   8   4   5   11.03    0.53
  -8  -4  -5   11.99    0.85
  -9  -4  -5    1.06    0.34
  -9   4  -5    0.73    0.21
   9   4   5    1.14    0.20
  -9  -4  -5    1.22    0.33
 -10  -4  -5    1.22    0.38
 -10   4  -5    1.22    0.24
  10   4   5    1.02    0.20
 -10  -4  -5    1.08    0.34
 -11  -4  -5    3.21    0.52
 -11   4  -5    2.97    0.36
 -11  -4  -5    3.40    0.48
 -12  -4  -5    1.85    0.41
 -12   4  -5    2.71    0.36
 -12  -4  -5    2.26    0.44
 -13  -4  -5    1.70    0.44
 -13   4  -5    1.97    0.34
 -13  -4  -5    2.11    0.45
 -14  -4  -5    1.00    0.40
  14  -4   5    0.81    0.37
 -14  -4  -5    1.24    0.39
 -14   4  -5    0.74    0.28
 -15  -4  -5    2.06    0.50
 -15   4  -5    2.39    0.41
  15  -4   5    1.69    0.48
  19   5  -5    1.05    0.39
  18   5  -5    0.87    0.40
  17   5  -5    0.58    0.36
  17  -5  -5    0.16    0.29
  16  -5  -5    0.40    0.28
  16   5  -5    1.66    0.45
  15  -5  -5    0.74    0.27
  15   5  -5    1.15    0.39
  14   5  -5    0.58    0.31
  14  -5  -5    0.50    0.26
  13   5  -5    3.13    0.51
  13  -5  -5    0.73    0.30
  12   5  -5    1.89    0.41
  12  -5  -5    0.91    0.31
  11   5  -5    0.62    0.30
  11  -5  -5    0.67    0.28
 -11  -5   5    0.55    0.23
  10   5  -5    6.57    0.65
  10  -5  -5    6.62    0.57
 -10  -5   5    5.99    0.45
   9   5  -5    7.54    0.68
   9  -5  -5    6.46    0.57
  -9  -5   5    8.34    0.49
   8  -5  -5    5.95    0.52
  -8  -5   5    6.22    0.40
   8   5  -5    5.81    0.59
   7   5  -5    5.63    0.57
   7  -5  -5    5.10    0.47
  -7  -5   5    5.97    0.37
   6   5  -5    9.62    0.74
   6  -5  -5    9.32    0.60
   5  -5  -5    4.13    0.55
   5   5  -5    4.01    0.50
   5  -5  -5    3.79    0.39
   4  -5  -5    0.19    0.25
   4   5  -5    0.20    0.22
   4  -5  -5   -0.06    0.15
   3   5  -5   16.29    0.91
   3  -5  -5   14.43    0.94
   3  -5  -5   15.14    0.62
   3  -5  -5   16.98    0.97
   2   5  -5   23.00    1.07
   2  -5  -5   22.29    1.14
   2  -5  -5   23.16    0.72
   2  -5  -5   22.99    1.11
   1  -5  -5    2.05    0.38
   1  -5  -5    1.68    0.36
   1  -5  -5    1.74    0.21
   1   5  -5    1.59    0.34
   0  -5  -5    0.42    0.22
   0  -5  -5    0.86    0.15
   0  -5  -5    0.53    0.24
   0   5  -5    0.72    0.25
  -1  -5  -5    0.04    0.26
  -1   5  -5    0.08    0.20
  -1  -5  -5    0.18    0.24
  -2  -5  -5    4.62    0.54
   2   5   5    4.46    0.41
  -2   5  -5    3.55    0.46
  -2  -5  -5    4.00    0.49
   3   5   5    8.88    0.57
  -3   5  -5   10.36    0.73
  -3  -5  -5    8.42    0.69
  -3  -5  -5    9.16    0.74
  -4   5  -5    7.83    0.67
   4   5   5    7.25    0.51
  -4  -5  -5    8.38    0.69
  -4  -5  -5    6.89    0.66
  -5  -5  -5    3.57    0.51
  -5   5  -5    5.18    0.55
   5   5   5    4.17    0.40
  -5  -5  -5    3.82    0.49
  -6  -5  -5    0.35    0.29
   6   5   5    0.39    0.19
  -6  -5  -5    0.33    0.20
  -7  -5  -5   -0.03    0.25
   7   5   5   -0.04    0.15
  -7  -5  -5    0.22    0.24
  -8  -5  -5    0.98    0.37
   8   5   5    0.58    0.20
  -8  -5  -5    0.39    0.24
  -9  -5  -5    0.04    0.29
  -9  -5  -5    0.06    0.23
 -10  -5  -5    0.43    0.33
 -10  -5  -5    0.43    0.28
 -11  -5  -5   -0.50    0.36
 -11  -5  -5    0.35    0.31
 -12  -5  -5    0.25    0.33
 -12  -5  -5   -0.05    0.25
 -13  -5  -5    0.55    0.34
 -13  -5  -5    1.02    0.37
  13  -5   5    0.09    0.39
 -14  -5  -5   -0.05    0.35
 -14  -5  -5    0.72    0.35
  15  -6  -5    0.23    0.29
  15   6  -5    1.80    0.43
  14  -6  -5    0.47    0.30
  14   6  -5    0.30    0.31
  13   6  -5    0.86    0.36
  13  -6  -5    0.23    0.24
  12   6  -5    0.28    0.30
  12  -6  -5   -0.31    0.30
  11   6  -5   -0.33    0.33
  11  -6  -5   -0.27    0.28
  10   6  -5    0.16    0.28
  10  -6  -5   -0.10    0.21
   9   6  -5   -0.21    0.31
   9  -6  -5   -0.14    0.20
   8   6  -5    0.15    0.27
   8  -6  -5   -0.40    0.23
   7  -6  -5    0.35    0.31
   7   6  -5    0.03    0.25
   7  -6  -5   -0.03    0.17
   6   6  -5    1.43    0.37
   6  -6  -5    1.27    0.40
   6  -6  -5    1.16    0.27
   5   6  -5    0.06    0.23
   5  -6  -5    0.05    0.25
   5  -6  -5    0.07    0.18
   5  -6  -5    0.28    0.23
   4  -6  -5   -0.36    0.32
   4  -6  -5    0.03    0.26
   4  -6  -5    0.32    0.18
   4   6  -5   -0.39    0.27
   3  -6  -5    0.09    0.28
   3   6  -5    0.11    0.27
   3  -6  -5    0.37    0.24
   2  -6  -5    1.17    0.37
   2  -6  -5    1.94    0.40
   2   6  -5    1.23    0.37
   1  -6  -5    1.11    0.36
   1  -6  -5    1.22    0.35
   1   6  -5    1.13    0.33
   0  -6  -5    1.20    0.35
   0   6  -5    1.88    0.44
   0  -6  -5    1.59    0.38
  -1  -6  -5    1.04    0.33
  -1  -6  -5    0.31    0.25
  -2  -6  -5    0.79    0.33
  -2   6  -5    0.49    0.28
  -2  -6  -5    0.87    0.31
  -3  -6  -5    3.11    0.51
  -3   6  -5    3.07    0.50
  -3  -6  -5    3.06    0.47
  -4  -6  -5    3.73    0.57
   4   6   5    5.07    0.51
  -4  -6  -5    3.97    0.52
  -4   6  -5    4.37    0.58
  -5  -6  -5    1.06    0.34
   5   6   5    1.81    0.33
  -5  -6  -5    1.09    0.31
  -6  -6  -5    1.96    0.43
   6   6   5    2.58    0.38
  -6  -6  -5    2.44    0.42
  -7  -6  -5    1.50    0.43
  -7  -6  -5    1.73    0.40
  -8  -6  -5    2.34    0.47
  -9  -6  -5    1.40    0.43
 -10  -6  -5    1.82    0.46
 -11  -6  -5    2.13    0.50
  12  -7  -5    0.15    0.28
  11  -7  -5    0.61    0.31
  10  -7  -5    1.70    0.39
   7   7  -5    0.92    0.42
   6   7  -5    1.52    0.46
   5   7  -5    1.07    0.39
   4   7  -5    3.86    0.61
   3   7  -5    1.84    0.43
   2   7  -5    1.93    0.48
   1   7  -5    0.29    0.32
   0  -7  -5   -0.35    0.30
   0   7  -5    0.18    0.32
  -1  -7  -5    0.72    0.32
  -1   7  -5    1.37    0.44
  -2  -7  -5    1.38    0.39
  -2   7  -5    2.41    0.55
  -3  -7  -5   -0.37    0.34
  -4  -7  -5    0.55    0.34
  -5  -7  -5    0.68    0.37
  -6  -7  -5    1.11    0.40
  -7  -7  -5   -0.29    0.34
  -8  -7  -5    0.77    0.40
  25   0  -6    0.76    0.36
  24   0  -6    1.06    0.39
 -23   0   6   -0.07    0.29
  23   0  -6    0.22    0.24
 -22   0   6    0.66    0.30
  22   0  -6    0.24    0.26
 -21   0   6    1.13    0.36
  21   0  -6    1.56    0.34
  20   0  -6    6.20    0.58
 -20   0   6    6.24    0.61
  19   0  -6    0.51    0.25
 -19   0   6    0.41    0.24
  18   0  -6    0.64    0.27
 -18   0   6    0.58    0.25
 -17   0   6   23.22    1.02
  17   0  -6   21.95    0.97
 -16   0   6    8.92    0.62
  16   0  -6    8.11    0.59
  15   0  -6   10.48    0.62
 -15   0   6   10.88    0.66
 -14   0   6    0.93    0.22
  14   0  -6    0.91    0.21
  13   0  -6    9.11    0.54
 -13   0   6    9.91    0.58
 -12   0   6   11.47    0.59
  12   0  -6   10.40    0.56
 -11   0   6    1.86    0.26
  11   0  -6    1.57    0.23
  10   0  -6    3.16    0.30
 -10   0   6    3.73    0.32
   9   0  -6    1.33    0.21
   9   0  -6    1.60    0.23
  -9   0   6    1.94    0.25
   8   0  -6   41.03    0.95
   8   0  -6   42.08    0.95
  -8   0   6   42.99    1.01
  -8   0   6   42.83    0.95
   7   0  -6   28.57    0.76
   7   0  -6   29.93    0.78
  -7   0   6   29.46    0.81
   6   0  -6   12.05    0.48
   6   0  -6   11.31    0.46
  -6   0   6   11.43    0.49
  -5   0   6   32.76    0.82
   5   0  -6   35.61    0.82
   5   0  -6   33.04    0.77
   4   0  -6   39.90    0.86
  -4   0   6   38.91    0.85
   4   0  -6   39.74    0.98
  -3   0   6   16.64    0.55
   3   0  -6   16.25    0.65
  -2   0   6  155.47    1.96
  -2   0   6  152.18    1.63
   2   0  -6  152.28    1.97
   1   0  -6   62.45    0.70
   1   0  -6   64.55    1.28
  -1   0   6   64.40    1.27
   0   0  -6  143.35    1.02
   0   0   6  144.22    1.92
   0   0  -6  145.82    1.91
   0   0  -6  143.45    1.76
  -1   0  -6  149.69    1.95
  -1   0  -6  150.88    0.96
   1   0   6  152.98    2.02
  -1   0  -6  146.71    1.80
  -2   0  -6   31.04    0.92
   2   0   6   31.29    0.93
  -2   0  -6   30.12    0.40
  -2   0  -6   30.19    0.84
   2   0   6   31.40    0.86
  -3   0  -6   85.71    1.56
   3   0   6   86.78    0.59
   3   0   6   86.83    1.63
  -3   0  -6   84.37    1.45
   3   0   6   86.88    1.47
  -4   0  -6  125.86    1.95
   4   0   6  128.76    0.79
  -4   0  -6  124.99    1.85
   4   0   6  128.22    1.89
  -5   0  -6  146.80    2.18
   5   0   6  147.39    0.95
  -5   0  -6  145.66    2.06
   5   0   6  147.99    2.11
  -6   0  -6   43.71    1.25
   6   0   6   42.62    0.59
  -6   0  -6   42.26    1.17
  -7   0  -6   37.85    1.20
   7   0   6   37.79    0.60
  -7   0  -6   37.41    1.13
  -8   0  -6   53.21    1.49
   8   0   6   55.86    0.80
  -8   0  -6   55.52    1.42
   9   0   6   57.24    0.86
  -9   0  -6   52.78    1.56
  -9   0  -6   54.39    1.47
 -10   0  -6   39.00    1.34
  10   0   6   37.51    0.76
 -10   0  -6   35.38    1.24
  11   0   6   36.09    0.79
 -11   0  -6   37.87    1.33
 -12   0  -6    2.36    0.40
  12   0   6    1.96    0.30
 -13   0  -6    0.45    0.25
  13   0   6    0.59    0.20
  14   0   6    2.13    0.34
 -14   0  -6    2.41    0.45
  15   0   6    4.41    0.48
 -15   0  -6    4.75    0.59
  16   0   6    2.01    0.35
 -16   0  -6    2.27    0.47
  17   0   6    0.79    0.30
 -17   0  -6    0.76    0.35
  18   0   6    0.84    0.31
 -18   0  -6    0.99    0.40
 -19   0  -6    0.69    0.40
  26   1  -6    0.39    0.35
  25   1  -6    0.12    0.23
  24   1  -6    0.59    0.31
  24  -1  -6   -0.03    0.28
 -23   1   6   -0.39    0.26
  23   1  -6    0.41    0.31
 -23  -1   6    0.07    0.30
  23  -1  -6   -0.24    0.25
 -22  -1   6    0.58    0.29
  22   1  -6    0.50    0.26
 -22   1   6    0.42    0.35
  22  -1  -6    0.53    0.28
 -21  -1   6    2.29    0.43
  21   1  -6    2.07    0.37
  21  -1  -6    2.36    0.45
 -21   1   6    2.31    0.46
 -20   1   6    0.56    0.31
 -20  -1   6    0.40    0.26
  20   1  -6    1.00    0.30
  20  -1  -6    0.39    0.27
 -19  -1   6    2.53    0.41
 -19   1   6    2.78    0.46
  19   1  -6    2.10    0.36
  19  -1  -6    2.51    0.39
 -18  -1   6    0.33    0.24
  18   1  -6    0.27    0.22
 -18   1   6    0.20    0.23
  18  -1  -6   -0.01    0.21
  17   1  -6    4.39    0.43
 -17   1   6    3.94    0.45
  17  -1  -6    4.52    0.48
 -17  -1   6    5.28    0.51
 -16   1   6    4.11    0.47
  16   1  -6    4.38    0.42
  16  -1  -6    4.20    0.45
 -16  -1   6    4.02    0.44
 -15  -1   6    6.78    0.52
  15   1  -6    6.12    0.47
  15  -1  -6    6.13    0.50
 -15   1   6    6.90    0.55
 -14  -1   6   35.09    1.10
 -14   1   6   37.52    1.18
  14   1  -6   33.82    1.04
  14  -1  -6   35.67    1.11
 -13   1   6   36.03    1.14
 -13  -1   6   36.26    1.06
  13   1  -6   34.56    1.02
  13  -1  -6   34.51    1.08
 -12  -1   6   38.97    1.04
  12   1  -6   38.23    1.02
  12  -1  -6   34.90    1.04
 -12   1   6   39.48    1.15
 -11   1   6   10.35    0.57
  11  -1  -6   10.90    0.57
  11   1  -6   10.31    0.53
 -11  -1   6   10.84    0.54
 -10   1   6   83.11    1.53
 -10  -1   6   80.22    1.34
  10   1  -6   76.58    1.40
  10  -1  -6   78.09    1.43
  -9  -1   6  169.35    1.85
   9   1  -6  161.29    2.00
   9  -1  -6  171.96    2.00
   9   1  -6  168.28    2.02
  -9   1   6  168.74    2.13
   8   1  -6   91.19    1.34
   8   1  -6   88.95    1.46
  -8  -1   6   88.08    1.46
   8  -1  -6   89.72    1.41
  -8  -1   6   89.24    1.27
  -7  -1   6  127.82    1.44
   7  -1  -6  130.92    1.79
  -7  -1   6  129.08    1.73
   7  -1  -6  133.38    1.63
   7   1  -6  133.21    1.74
  -7   1   6  128.13    1.72
   7   1  -6  130.07    1.48
  -6  -1   6   33.14    0.87
   6   1  -6   31.63    0.68
   6  -1  -6   30.37    0.86
   6  -1  -6   32.05    0.77
  -6   1   6   31.74    0.83
  -6  -1   6   31.22    0.67
   5   1  -6   26.59    0.58
  -5  -1   6   25.47    0.75
   5  -1  -6   26.21    0.67
  -5   1   6   26.43    0.71
   4   1  -6   21.02    0.50
   4  -1  -6   20.11    0.57
  -4  -1   6   20.88    0.66
   4   1  -6   19.84    0.56
   4   1  -6   20.59    0.60
  -4   1   6   20.66    0.60
   3   1  -6   17.74    0.57
   3   1  -6   18.63    0.54
  -3   1   6   18.13    0.54
   3  -1  -6   18.51    0.76
   3  -1  -6   17.43    0.51
  -2   1   6   69.39    1.02
   2   1  -6   68.86    1.10
   2  -1  -6   68.70    0.99
   2   1  -6   69.77    1.04
   2  -1  -6   67.61    1.46
  -2  -1   6   72.44    1.14
   1  -1  -6    1.57    0.25
  -1  -1   6    1.67    0.19
  -1   1   6    1.64    0.25
  -1   1   6    1.51    0.16
  -1  -1   6    1.86    0.16
   1   1  -6    1.62    0.17
   1   1  -6    1.37    0.15
   1   1  -6    1.55    0.19
   0   1   6   91.62    1.12
   0  -1  -6   88.14    1.69
   0   1  -6   91.58    1.32
   0   1  -6   93.53    1.15
   0  -1   6   91.69    1.03
   0  -1   6   91.30    1.37
   0   1   6   93.87    1.73
   0   1  -6   89.80    1.13
   0  -1  -6   89.20    1.57
   1   1   6    6.95    0.31
  -1   1  -6    7.04    0.39
  -1   1  -6    7.16    0.32
   1  -1   6    7.58    0.30
  -1  -1  -6    7.61    0.51
   1  -1   6    7.50    0.41
   1   1   6    7.35    0.50
  -1   1  -6    7.14    0.33
  -1  -1  -6    6.18    0.43
  -2  -1  -6    2.26    0.29
   2  -1   6    2.06    0.17
   2   1   6    1.91    0.27
  -2   1  -6    2.43    0.25
  -2   1  -6    1.87    0.17
  -2   1  -6    2.18    0.20
  -2  -1  -6    1.88    0.27
   2  -1   6    1.86    0.22
   2  -1   6    2.11    0.20
  -3   1  -6    1.10    0.17
   3  -1   6    1.24    0.16
  -3  -1  -6    0.78    0.18
  -3   1  -6    1.04    0.14
   3  -1   6    1.06    0.13
  -3   1  -6    1.37    0.21
  -3  -1  -6    1.76    0.28
   3  -1   6    1.38    0.21
  -4   1  -6    0.03    0.11
  -4  -1  -6   -0.19    0.18
   4  -1   6   -0.06    0.09
  -4   1  -6    0.15    0.15
   4  -1   6    0.07    0.06
  -4  -1  -6   -0.12    0.15
   4  -1   6    0.15    0.14
  -5   1  -6    0.09    0.10
  -5  -1  -6    0.20    0.16
   5  -1   6    0.20    0.11
  -5   1  -6    0.17    0.13
   5  -1   6    0.04    0.07
  -5  -1  -6    0.19    0.18
  -6   1  -6    7.23    0.51
  -6  -1  -6    6.73    0.53
   6  -1   6    6.49    0.33
  -6   1  -6    6.69    0.43
  -6  -1  -6    6.66    0.51
   6  -1   6    6.68    0.45
   7  -1   6    7.94    0.38
  -7  -1  -6    8.63    0.60
  -7   1  -6    7.24    0.48
  -7  -1  -6    8.24    0.59
   8   1   6    7.38    0.21
  -8  -1  -6    9.05    0.64
   8  -1   6    8.20    0.40
   8   1   6    7.98    0.20
  -8   1  -6    7.78    0.52
  -8  -1  -6    7.63    0.59
  -9  -1  -6   39.10    1.34
   9  -1   6   36.58    0.87
   9   1   6   37.78    0.50
  -9   1  -6   39.30    1.16
  -9  -1  -6   38.00    1.31
 -10  -1  -6    7.02    0.62
  10  -1   6    5.99    0.37
 -10   1  -6    6.86    0.53
 -10  -1  -6    6.25    0.55
  10   1   6    6.58    0.24
  10   1   6    7.23    0.44
 -11  -1  -6   11.97    0.81
 -11   1  -6   12.14    0.72
 -11  -1  -6   12.86    0.82
  11   1   6   12.35    0.60
 -12  -1  -6   -0.03    0.25
 -12  -1  -6    0.16    0.23
  12   1   6    0.35    0.15
 -12   1  -6    0.36    0.22
 -13   1  -6    7.33    0.62
 -13  -1  -6    6.44    0.64
  13   1   6    7.05    0.49
 -14  -1  -6    1.51    0.37
  14   1   6    2.12    0.31
  14  -1   6    2.07    0.37
 -14   1  -6    2.56    0.41
 -15  -1  -6    4.56    0.59
  15   1   6    5.34    0.49
  15  -1   6    3.94    0.50
 -15   1  -6    4.68    0.54
  16  -1   6    3.20    0.48
 -16   1  -6    4.73    0.58
 -16  -1  -6    4.00    0.60
  17  -1   6    2.84    0.48
 -17  -1  -6    3.42    0.56
  18  -1   6    1.22    0.35
 -18  -1  -6    1.04    0.39
  19  -1   6    2.18    0.47
 -19   1  -6    0.86    0.35
  20  -1   6    1.26    0.41
  23   2  -6    1.07    0.32
 -23  -2   6    1.57    0.41
  23  -2  -6    2.29    0.49
  22   2  -6    0.26    0.22
 -22   2   6    0.35    0.29
 -22  -2   6    0.28    0.26
  22  -2  -6    0.79    0.37
  21  -2  -6    1.00    0.36
 -21   2   6    0.42    0.26
  21   2  -6    0.39    0.22
 -21  -2   6    0.28    0.24
  20  -2  -6    0.79    0.31
 -20   2   6    1.27    0.39
  20   2  -6    0.60    0.23
 -20  -2   6    1.22    0.35
  19  -2  -6    2.40    0.40
 -19  -2   6    3.18    0.45
  19   2  -6    2.78    0.38
 -19   2   6    2.18    0.42
 -18   2   6   10.71    0.80
  18   2  -6   10.80    0.68
  18  -2  -6   10.57    0.77
 -18  -2   6   10.11    0.72
  17  -2  -6    1.20    0.33
  17   2  -6    0.83    0.24
 -17   2   6    0.68    0.30
 -17  -2   6    0.95    0.27
  16  -2  -6    0.64    0.27
  16   2  -6    0.45    0.16
 -16  -2   6    0.79    0.25
 -16   2   6    0.40    0.24
  15   2  -6    0.48    0.19
  15  -2  -6    0.03    0.19
 -15  -2   6    0.35    0.19
 -15   2   6    0.21    0.24
  14   2  -6   -0.07    0.17
  14  -2  -6    0.17    0.20
 -14   2   6    0.15    0.16
 -14  -2   6    0.15    0.17
 -13  -2   6    4.96    0.40
 -13   2   6    4.43    0.43
  13   2  -6    4.48    0.39
  13  -2  -6    4.54    0.44
  12   2  -6   -0.08    0.17
 -12   2   6    0.11    0.17
  12  -2  -6    0.29    0.20
 -12  -2   6   -0.02    0.14
 -11  -2   6   12.54    0.57
  11   2  -6   11.36    0.59
  11  -2  -6   12.23    0.64
  10  -2  -6    0.06    0.15
 -10  -2   6    0.30    0.13
  10   2  -6    0.44    0.19
   9   2  -6    4.66    0.39
   9  -2  -6    4.05    0.34
  -9  -2   6    4.44    0.30
   9   2  -6    4.95    0.37
  -8  -2   6    3.05    0.23
   8   2  -6    3.28    0.34
   8  -2  -6    2.91    0.29
   8   2  -6    3.37    0.29
   7   2  -6    0.45    0.12
  -7  -2   6    0.51    0.11
   7   2  -6    0.68    0.20
   7  -2  -6    0.59    0.16
  -6  -2   6    0.93    0.17
  -6  -2   6    0.88    0.11
  -6   2   6    0.90    0.16
   6   2  -6    0.83    0.18
   6  -2  -6    1.03    0.17
   6   2  -6    0.96    0.13
   5   2  -6   18.36    0.42
  -5  -2   6   18.11    0.66
   5   2  -6   18.69    0.68
   5  -2  -6   16.53    0.56
   5   2  -6   17.26    0.47
  -5   2   6   17.89    0.63
   4  -2  -6  131.97    1.45
   4   2  -6  134.52    1.80
   4   2  -6  133.10    1.00
  -4   2   6  131.09    1.61
   4   2  -6  128.85    1.12
  -3  -2   6   57.75    1.03
   3   2  -6   57.88    0.52
   3   2  -6   59.44    1.18
   3   2  -6   58.43    0.68
   3  -2  -6   58.41    0.93
   3  -2  -6   58.51    1.46
  -3   2   6   58.15    0.99
   3   2  -6   57.87    0.63
   2   2  -6   23.46    0.30
   2   2  -6   25.99    0.77
   2  -2  -6   24.88    0.61
   2   2  -6   24.84    0.49
   2  -2  -6   24.40    0.57
  -2  -2   6   24.85    0.68
   2  -2  -6   24.83    0.95
  -2  -2   6   24.61    0.55
  -2   2   6   24.56    0.61
   1  -2  -6   83.60    1.05
   1  -2  -6   84.75    1.01
  -1  -2   6   85.01    1.09
   1  -2  -6   84.66    1.81
  -1   2   6   85.79    1.05
   1   2  -6   81.51    1.00
   1   2  -6   83.07    0.63
   1   2  -6   88.54    1.40
  -1  -2   6   84.10    1.26
   0  -2  -6  154.63    1.28
   0   2  -6  149.98    1.47
   0  -2  -6  152.18    1.34
   0   2  -6  151.95    1.84
   0  -2   6  151.21    1.70
   0  -2   6  149.05    1.57
   0  -2  -6  146.71    2.39
   0   2   6  151.92    1.28
   0   2  -6  147.27    0.89
   0  -2  -6  153.67    2.30
  -1   2  -6   43.88    0.98
  -1   2  -6   43.02    0.87
  -1  -2  -6   42.89    0.67
   1  -2   6   42.78    0.92
   1  -2   6   43.07    0.91
  -1  -2  -6   43.49    1.30
   1   2   6   44.85    0.64
  -1   2  -6   42.41    0.56
  -1  -2  -6   45.19    1.26
   2  -2   6  103.47    1.46
  -2   2  -6  103.05    1.51
  -2  -2  -6  104.72    0.94
   2  -2   6  108.14    1.53
  -2  -2  -6  107.29    2.02
   2   2   6  105.34    0.92
  -2   2  -6  106.15    1.02
  -2  -2  -6  104.62    1.94
  -3   2  -6   56.62    1.11
   3  -2   6   55.50    1.18
   3  -2   6   56.38    1.09
  -3  -2  -6   57.74    1.50
  -3  -2  -6   54.45    0.61
   3   2   6   56.59    0.64
  -3   2  -6   56.53    0.83
  -3  -2  -6   59.22    1.47
   3  -2   6   55.89    0.90
   4   2   6   63.73    0.68
  -4   2  -6   65.13    1.19
   4  -2   6   65.68    1.21
  -4  -2  -6   68.19    1.62
  -4   2  -6   64.33    1.00
  -4  -2  -6   66.91    1.61
   4  -2   6   65.84    1.07
   4  -2   6   65.05    1.34
   5   2   6   12.61    0.31
   5  -2   6   12.65    0.55
  -5  -2  -6   13.93    0.76
  -5   2  -6   12.11    0.48
  -5  -2  -6   13.18    0.75
   5  -2   6   13.07    0.52
   6   2   6   18.05    0.33
  -6   2  -6   19.63    0.65
  -6  -2  -6   19.14    0.90
  -6  -2  -6   19.70    0.93
   6  -2   6   19.51    0.69
   6   2   6   18.56    0.39
   6   2   6   17.71    0.39
   7   2   6   37.99    0.50
  -7  -2  -6   39.79    1.33
  -7   2  -6   39.93    0.98
  -7  -2  -6   39.09    1.33
   7   2   6   37.23    0.62
   7  -2   6   39.19    1.04
  -8  -2  -6   40.21    1.35
   8   2   6   37.25    0.53
  -8   2  -6   39.42    1.03
   8   2   6   39.30    0.67
  -8  -2  -6   37.22    1.34
  -9  -2  -6    5.80    0.56
   9   2   6    5.51    0.22
  -9   2  -6    6.00    0.45
   9   2   6    5.90    0.29
  -9  -2  -6    6.31    0.60
 -10  -2  -6   17.49    0.98
  10   2   6   14.87    0.39
  10   2   6   17.07    0.51
 -10   2  -6   16.31    0.74
 -10  -2  -6   15.70    0.92
 -11  -2  -6    8.87    0.72
  11   2   6    8.30    0.31
  11   2   6    8.18    0.38
 -11  -2  -6    7.55    0.67
 -12  -2  -6   15.86    0.98
 -12  -2  -6   15.31    0.97
 -13  -2  -6    4.12    0.55
 -13  -2  -6    4.27    0.60
 -14  -2  -6    0.41    0.25
  14  -2   6    0.58    0.25
 -14   2  -6    1.04    0.29
 -15  -2  -6    0.87    0.41
 -15   2  -6    0.33    0.27
  15  -2   6    0.01    0.23
 -16  -2  -6    0.13    0.29
 -16   2  -6   -0.11    0.26
  16  -2   6    0.30    0.28
  17  -2   6    0.43    0.35
 -17   2  -6   -0.01    0.27
 -18   2  -6    0.42    0.32
  18  -2   6    0.45    0.36
 -19   2  -6    0.31    0.27
  19  -2   6    0.58    0.37
 -23  -3   6    0.42    0.34
  23   3  -6    0.82    0.40
 -22   3   6    0.64    0.32
 -22  -3   6    0.78    0.33
  22   3  -6    0.77    0.34
  21  -3  -6    2.56    0.51
 -21  -3   6    2.94    0.50
  21   3  -6    2.41    0.49
 -21   3   6    2.55    0.49
 -20  -3   6    0.11    0.26
  20  -3  -6    0.19    0.28
 -20   3   6   -0.13    0.30
  20   3  -6    0.14    0.32
  20   3  -6    0.07    0.19
  19  -3  -6    2.98    0.49
 -19   3   6    2.15    0.44
 -19  -3   6    1.93    0.39
  19   3  -6    2.34    0.42
  18  -3  -6    1.19    0.33
 -18   3   6    1.30    0.35
 -18  -3   6    1.30    0.31
  18   3  -6    1.27    0.37
 -17   3   6    3.26    0.47
 -17  -3   6    3.84    0.44
  17  -3  -6    4.02    0.49
  17   3  -6    3.47    0.48
  16  -3  -6    1.93    0.38
 -16  -3   6    1.02    0.27
  16   3  -6    1.88    0.38
 -15  -3   6    6.33    0.50
  15   3  -6    6.78    0.60
  15  -3  -6    5.27    0.53
 -14  -3   6    2.39    0.33
  14  -3  -6    2.70    0.40
  14   3  -6    2.70    0.40
  13   3  -6   10.64    0.56
  13   3  -6   11.62    0.72
 -13  -3   6   11.19    0.60
  13  -3  -6   10.66    0.69
 -12  -3   6   19.09    0.74
  12   3  -6   17.73    0.65
  12   3  -6   17.95    0.87
  12  -3  -6   18.37    0.86
 -11  -3   6   10.37    0.51
  11   3  -6   10.88    0.68
  11   3  -6   10.55    0.47
  11  -3  -6   10.08    0.62
  10   3  -6    6.91    0.34
  10  -3  -6    7.12    0.51
  10   3  -6    7.09    0.54
 -10  -3   6    8.21    0.43
  -9  -3   6   33.02    0.78
   9   3  -6   31.78    0.60
   9   3  -6   30.81    1.07
   9  -3  -6   32.71    0.99
   9   3  -6   31.36    0.95
   8   3  -6   16.72    0.33
  -8  -3   6   18.64    0.54
   8   3  -6   19.56    0.83
   8  -3  -6   17.15    0.72
   8   3  -6   19.26    0.69
  -7  -3   6   19.74    0.49
   7   3  -6   21.91    0.87
   7  -3  -6   19.26    0.72
   7   3  -6   19.90    0.64
  -6  -3   6   36.96    0.57
   6   3  -6   38.31    1.13
   6  -3  -6   37.11    0.94
   6   3  -6   35.49    0.78
   5   3  -6   34.67    1.08
   5  -3  -6   33.00    0.85
   5   3  -6   33.98    0.65
  -5   3   6   34.92    0.98
   4   3  -6    5.67    0.45
   4  -3  -6    5.14    0.49
   4   3  -6    5.10    0.21
   4  -3  -6    5.61    0.33
  -4   3   6    5.84    0.39
   3  -3  -6    9.39    0.48
   3   3  -6   10.11    0.58
   3  -3  -6    9.33    0.41
   3  -3  -6   10.28    0.70
  -3   3   6    9.90    0.46
   2  -3  -6   29.06    1.14
   2  -3  -6   28.05    0.78
   2  -3  -6   29.72    0.66
   2   3  -6   30.32    0.97
  -2   3   6   28.75    0.74
   1  -3  -6    1.79    0.31
   1  -3  -6    2.15    0.34
   1  -3  -6    2.01    0.17
  -1  -3   6    1.88    0.15
   1  -3  -6    1.99    0.22
   1   3  -6    1.96    0.28
   0   3  -6   10.21    0.58
   0  -3  -6    9.45    0.45
   0  -3  -6    9.24    0.31
   0  -3   6    9.31    0.37
   0  -3  -6    9.08    0.66
   0  -3  -6    8.61    0.63
  -1  -3  -6    1.08    0.27
  -1   3  -6    1.04    0.22
  -1  -3  -6    1.15    0.16
  -1  -3  -6    1.58    0.32
   1  -3   6    1.08    0.16
  -1  -3  -6    1.07    0.10
  -2  -3  -6    0.06    0.16
  -2   3  -6    0.04    0.05
  -2   3  -6    0.06    0.16
  -2  -3  -6    0.06    0.08
   2  -3   6    0.00    0.08
  -2  -3  -6   -0.05    0.21
  -3  -3  -6    1.24    0.31
  -3   3  -6    1.02    0.13
  -3   3  -6    1.07    0.24
  -3  -3  -6    0.72    0.13
   3  -3   6    0.71    0.17
  -3  -3  -6    1.56    0.35
  -4   3  -6    0.56    0.12
  -4  -3  -6    0.41    0.20
   4  -3   6    0.53    0.09
   4   3   6    0.68    0.13
  -4   3  -6    1.03    0.23
  -4  -3  -6    0.75    0.13
   4  -3   6    0.53    0.15
  -4  -3  -6    1.24    0.31
  -5   3  -6    7.83    0.51
  -5  -3  -6    7.70    0.62
  -5   3  -6    8.48    0.39
   5   3   6    7.50    0.34
  -5  -3  -6    7.69    0.63
   5  -3   6    8.23    0.37
  -6   3  -6   10.24    0.47
   6   3   6   10.51    0.39
  -6  -3  -6    9.22    0.68
  -6  -3  -6   10.25    0.74
   6  -3   6   10.58    0.46
  -7  -3  -6    0.37    0.22
   7  -3   6    0.44    0.14
  -7   3  -6    0.38    0.14
   7   3   6    0.34    0.09
  -7  -3  -6    0.36    0.22
  -8  -3  -6    2.69    0.43
  -8   3  -6    2.67    0.29
  -8  -3  -6    2.99    0.46
   8   3   6    2.37    0.20
  -9   3  -6   30.16    0.96
  -9  -3  -6   30.64    1.27
   9   3   6   28.91    0.65
  -9  -3  -6   29.70    1.31
 -10  -3  -6    3.14    0.50
 -10   3  -6    2.50    0.33
 -10  -3  -6    2.74    0.42
 -11   3  -6    0.13    0.16
 -11  -3  -6    0.46    0.29
 -12  -3  -6    4.60    0.59
 -12   3  -6    4.21    0.45
 -12  -3  -6    4.23    0.55
 -13   3  -6    8.79    0.66
 -13  -3  -6    9.69    0.82
 -13  -3  -6    8.23    0.79
 -14  -3  -6    2.60    0.53
 -14   3  -6    3.69    0.46
 -14  -3  -6    3.12    0.53
 -15  -3  -6    2.66    0.51
 -15   3  -6    2.08    0.41
  15  -3   6    2.74    0.50
 -16  -3  -6    4.46    0.69
  16  -3   6    3.43    0.60
 -16   3  -6    4.98    0.58
 -17   3  -6    0.88    0.33
  17  -3   6    2.09    0.48
 -18   3  -6    1.65    0.41
 -19   3  -6    1.05    0.41
 -22  -4   6    0.94    0.35
 -21  -4   6    0.63    0.31
  21   4  -6    0.30    0.32
  20  -4  -6    1.94    0.50
 -20  -4   6    1.62    0.37
  20   4  -6    1.76    0.46
  19  -4  -6    2.30    0.44
 -19  -4   6    2.18    0.41
  19   4  -6    2.56    0.49
  18  -4  -6    0.14    0.29
 -18  -4   6   -0.06    0.21
  18   4  -6    0.52    0.33
  17  -4  -6    0.42    0.25
 -17  -4   6    0.47    0.25
  17   4  -6    0.11    0.29
 -16  -4   6    0.91    0.27
  16  -4  -6    0.64    0.31
  16   4  -6    0.80    0.35
  15  -4  -6    2.32    0.40
 -15  -4   6    2.55    0.36
  15   4  -6    2.20    0.41
 -14  -4   6    3.63    0.37
  14  -4  -6    2.76    0.44
  14   4  -6    3.48    0.48
 -13  -4   6    0.28    0.16
  13  -4  -6   -0.07    0.18
  13   4  -6    0.15    0.25
 -12  -4   6    5.29    0.39
  12  -4  -6    5.31    0.50
  12   4  -6    4.32    0.50
 -11  -4   6    0.22    0.15
  11  -4  -6   -0.05    0.20
  11   4  -6    0.00    0.23
 -10  -4   6    1.57    0.21
  10  -4  -6    1.25    0.26
  10   4  -6    1.69    0.32
   9   4  -6    0.32    0.17
  -9  -4   6    0.46    0.13
   9  -4  -6    0.12    0.16
   9   4  -6    0.38    0.21
   8   4  -6   24.20    1.06
   8  -4  -6   24.26    0.90
  -8  -4   6   24.35    0.60
   8   4  -6   23.26    0.80
   7   4  -6    0.51    0.16
   7  -4  -6    0.56    0.18
   7   4  -6    0.35    0.22
  -7  -4   6    0.56    0.10
   6   4  -6    0.53    0.11
   6  -4  -6    0.44    0.17
   6   4  -6    0.50    0.24
  -6  -4   6    0.64    0.08
   5  -4  -6    8.43    0.48
   5   4  -6    8.92    0.63
   5  -4  -6    8.91    0.71
   4  -4  -6   21.72    1.09
   4   4  -6   23.36    1.00
   4  -4  -6   22.64    0.72
   3   4  -6    7.02    0.57
   3  -4  -6    6.01    0.59
   3  -4  -6    6.44    0.37
   2   4  -6   42.04    1.30
   2  -4  -6   39.07    1.44
   2  -4  -6   39.46    0.84
   2  -4  -6   37.72    1.40
   1   4  -6   25.45    1.02
   1  -4  -6   22.22    1.10
   1  -4  -6   24.36    0.59
   1  -4  -6   24.47    1.12
   0   4  -6    8.83    0.62
   0  -4  -6   10.29    0.35
   0  -4  -6    8.94    0.70
   0  -4   6    9.66    0.34
   0  -4  -6    9.42    0.70
  -1   4  -6    8.46    0.59
  -1  -4  -6    8.39    0.27
   1  -4   6    8.40    0.38
  -1  -4  -6    7.84    0.66
  -1  -4  -6    7.91    0.66
  -2  -4  -6    9.49    0.71
  -2   4  -6    8.95    0.63
   2  -4   6    8.76    0.44
  -2  -4  -6    8.63    0.68
  -3   4  -6   15.96    0.81
   3  -4   6   14.45    0.61
  -3  -4  -6   13.48    0.86
  -3  -4  -6   14.59    0.89
   4   4   6   23.51    0.74
   4  -4   6   23.39    0.83
  -4  -4  -6   24.27    1.13
  -4  -4  -6   23.77    1.15
  -4   4  -6   24.31    0.99
   5   4   6   19.01    0.67
  -5   4  -6   19.57    0.91
  -5  -4  -6   18.22    0.99
  -5  -4  -6   19.40    1.06
  -6   4  -6    3.98    0.30
  -6  -4  -6    3.57    0.51
   6   4   6    3.97    0.32
  -6  -4  -6    3.58    0.47
  -7  -4  -6   -0.03    0.27
   7   4   6    0.16    0.13
  -7  -4  -6    0.32    0.26
  -7   4  -6    0.12    0.12
  -8   4  -6    8.50    0.49
  -8  -4  -6    8.85    0.74
   8   4   6    8.25    0.44
  -8  -4  -6    8.87    0.78
  -9   4  -6    4.45    0.39
  -9  -4  -6    4.10    0.57
  -9  -4  -6    4.91    0.56
 -10  -4  -6    1.37    0.40
 -10   4  -6    0.97    0.22
 -10  -4  -6    1.36    0.35
 -11  -4  -6    4.50    0.62
 -11   4  -6    3.81    0.39
 -11  -4  -6    4.38    0.57
 -12  -4  -6    1.05    0.38
 -12   4  -6    1.59    0.31
 -12  -4  -6    1.36    0.39
 -13  -4  -6    0.06    0.27
 -13  -4  -6    0.20    0.32
 -14  -4  -6    0.05    0.34
 -14  -4  -6    0.05    0.29
 -15  -4  -6   -0.03    0.31
  15  -4   6   -0.58    0.37
 -15  -4  -6    0.56    0.37
  19   5  -6   -0.02    0.33
  18   5  -6   -0.16    0.34
  17  -5  -6   -0.04    0.30
  17   5  -6    0.07    0.29
  16  -5  -6    0.06    0.30
  16   5  -6    0.75    0.41
  15  -5  -6    1.36    0.33
  15   5  -6    2.27    0.50
  14  -5  -6   -0.31    0.30
  14   5  -6    0.74    0.36
  13  -5  -6    1.80    0.36
  13   5  -6    2.35    0.47
  12  -5  -6    2.69    0.39
  12   5  -6    2.78    0.47
  11  -5  -6    4.27    0.48
  11   5  -6    4.03    0.55
  10  -5  -6    2.98    0.41
  10   5  -6    2.96    0.49
   9  -5  -6    2.40    0.34
   9   5  -6    3.68    0.49
   8  -5  -6    1.30    0.26
   8   5  -6    2.02    0.40
   7  -5  -6    0.96    0.22
   7   5  -6    1.05    0.33
   6  -5  -6    2.46    0.45
   6  -5  -6    2.39    0.30
   6   5  -6    2.37    0.42
   5  -5  -6    4.88    0.61
   5   5  -6    3.61    0.48
   5  -5  -6    3.61    0.36
   4  -5  -6    0.23    0.14
   4   5  -6    0.13    0.23
   4  -5  -6   -0.25    0.27
   3  -5  -6    0.08    0.13
   3  -5  -6    0.15    0.22
   3  -5  -6    0.01    0.27
   3   5  -6    0.02    0.20
   2  -5  -6    0.29    0.13
   2  -5  -6    0.46    0.28
   2   5  -6    0.25    0.24
   2  -5  -6    0.13    0.24
   1  -5  -6    5.78    0.62
   1  -5  -6    7.11    0.69
   1   5  -6    5.45    0.56
   1  -5  -6    6.91    0.35
   0  -5  -6   -0.20    0.27
   0  -5  -6    0.14    0.26
   0   5  -6    0.00    0.27
  -1  -5  -6    0.15    0.25
  -1   5  -6    0.25    0.24
  -1  -5  -6    0.23    0.24
  -2  -5  -6    0.22    0.28
  -2   5  -6    0.04    0.23
  -2  -5  -6   -0.15    0.22
  -3  -5  -6    2.11    0.42
  -3   5  -6    2.18    0.39
  -3  -5  -6    2.72    0.45
  -4  -5  -6    0.33    0.29
  -4   5  -6    0.66    0.27
  -4  -5  -6    1.15    0.35
  -5  -5  -6    0.72    0.33
  -5   5  -6    0.64    0.31
   5   5   6    0.72    0.22
  -5  -5  -6    0.96    0.32
  -6  -5  -6    1.04    0.32
   6   5   6    1.18    0.23
  -6  -5  -6    1.05    0.32
  -7  -5  -6    2.89    0.52
   7   5   6    3.70    0.36
  -7  -5  -6    3.79    0.53
  -8  -5  -6    2.99    0.52
  -8  -5  -6    2.64    0.44
  -9  -5  -6    1.34    0.42
  -9  -5  -6    1.51    0.38
 -10  -5  -6    1.67    0.47
 -10  -5  -6    0.84    0.34
 -11  -5  -6    2.59    0.49
 -11  -5  -6    3.14    0.52
 -12  -5  -6    3.29    0.60
 -12  -5  -6    4.14    0.59
 -13  -5  -6    1.01    0.36
 -13  -5  -6    2.29    0.49
 -14  -5  -6    0.94    0.40
 -15  -5  -6    1.11    0.44
  15  -6  -6    0.27    0.31
  15   6  -6    1.06    0.40
  14  -6  -6    0.07    0.24
  14   6  -6    0.91    0.43
  13  -6  -6    1.40    0.37
  13   6  -6    1.26    0.40
  12   6  -6    0.60    0.35
  12  -6  -6    0.13    0.25
  11  -6  -6   -0.36    0.27
  11   6  -6    0.54    0.35
  10  -6  -6    0.04    0.21
  10   6  -6   -0.13    0.28
   9  -6  -6    0.00    0.23
   9   6  -6   -0.07    0.29
   8  -6  -6    0.11    0.33
   8  -6  -6    0.16    0.19
   8   6  -6    0.33    0.32
   7  -6  -6    0.32    0.29
   7  -6  -6    0.22    0.20
   7   6  -6   -0.13    0.33
   6  -6  -6    2.69    0.51
   6  -6  -6    2.31    0.45
   6  -6  -6    2.67    0.36
   6   6  -6    2.95    0.52
   5  -6  -6    0.07    0.27
   5   6  -6    0.31    0.32
   5  -6  -6    0.15    0.17
   5  -6  -6    0.17    0.25
   4  -6  -6    1.21    0.37
   4  -6  -6    0.99    0.34
   4   6  -6    1.42    0.42
   3  -6  -6    3.87    0.59
   3  -6  -6    4.36    0.57
   3   6  -6    4.57    0.59
   2  -6  -6    2.43    0.48
   2  -6  -6    1.77    0.43
   2   6  -6    1.77    0.43
   1  -6  -6   -0.12    0.33
   1  -6  -6    0.70    0.35
   1   6  -6    0.29    0.29
   0  -6  -6    0.79    0.34
   0   6  -6    1.11    0.34
   0  -6  -6    1.13    0.37
  -1  -6  -6    3.47    0.53
  -1   6  -6    3.67    0.54
  -1  -6  -6    3.25    0.52
  -2  -6  -6    3.33    0.53
  -2   6  -6    4.39    0.60
  -2  -6  -6    3.43    0.50
  -3  -6  -6   -0.24    0.32
  -3   6  -6    0.42    0.31
  -3  -6  -6    0.47    0.33
  -4  -6  -6    0.47    0.35
  -4   6  -6    1.21    0.41
  -4  -6  -6    1.18    0.37
  -5  -6  -6    0.61    0.35
  -5  -6  -6    0.56    0.32
  -6  -6  -6    0.07    0.30
  -6  -6  -6    0.22    0.28
  -7  -6  -6    0.78    0.36
  -7  -6  -6    0.73    0.33
  -8  -6  -6    0.13    0.32
  -8  -6  -6    0.44    0.29
  -9  -6  -6    0.20    0.36
 -10  -6  -6    0.22    0.34
  12  -7  -6    0.02    0.25
  11  -7  -6    0.45    0.33
  10  -7  -6    0.07    0.32
   9  -7  -6    0.55    0.33
   8  -7  -6    0.10    0.29
   7  -7  -6    0.20    0.31
   5   7  -6    0.71    0.40
   4   7  -6   -0.16    0.30
   4  -7  -6    0.25    0.29
   3  -7  -6    0.41    0.35
   3   7  -6    0.79    0.40
   2  -7  -6    0.54    0.34
   2   7  -6    0.39    0.36
   1  -7  -6    0.57    0.36
   1   7  -6   -0.31    0.38
   0  -7  -6    0.38    0.33
  -1  -7  -6    0.08    0.29
  -2  -7  -6   -0.11    0.31
  -3  -7  -6    0.47    0.33
  -4  -7  -6    0.20    0.32
  -5  -7  -6   -0.06    0.34
  -6  -7  -6    0.53    0.39
  -7  -7  -6    0.90    0.47
  25   0  -7    0.04    0.29
  24   0  -7    0.20    0.26
  23   0  -7    0.40    0.31
 -23   0   7    0.13    0.26
 -22   0   7   -0.07    0.25
  22   0  -7    0.30    0.26
  21   0  -7    0.28    0.26
 -21   0   7    0.48    0.31
 -20   0   7    0.58    0.34
  20   0  -7   -0.15    0.20
 -19   0   7    0.01    0.24
  19   0  -7    0.03    0.23
 -18   0   7    1.52    0.38
  18   0  -7    2.29    0.40
  17   0  -7    0.48    0.37
 -17   0   7    1.10    0.36
  16   0  -7   -0.06    0.17
 -16   0   7    0.36    0.23
 -15   0   7    0.20    0.25
  15   0  -7   -0.20    0.20
 -14   0   7    3.79    0.43
  14   0  -7    3.59    0.41
 -13   0   7   -0.11    0.16
  13   0  -7    0.27    0.17
 -12   0   7   -0.02    0.14
  12   0  -7    0.16    0.17
 -11   0   7   -0.07    0.15
  11   0  -7    0.01    0.12
  10   0  -7    0.02    0.11
 -10   0   7   -0.10    0.15
  -9   0   7   -0.09    0.14
   9   0  -7    0.11    0.13
   8   0  -7    0.09    0.14
   8   0  -7   -0.01    0.10
   7   0  -7   -0.02    0.09
  -7   0   7    0.07    0.10
   7   0  -7   -0.01    0.11
   6   0  -7   -0.02    0.10
   6   0  -7    0.09    0.09
  -6   0   7    0.07    0.11
   5   0  -7   -0.23    0.13
   5   0  -7   -0.05    0.11
  -5   0   7   -0.05    0.10
   4   0  -7   -0.08    0.12
  -4   0   7   -0.06    0.07
   3   0  -7   -0.10    0.10
  -3   0   7    0.08    0.08
  -2   0   7    0.05    0.09
   2   0  -7    0.11    0.13
  -2   0   7    0.01    0.09
   1   0  -7    0.05    0.11
   1   0  -7    0.02    0.05
  -1   0   7    0.06    0.10
  -1   0   7    0.08    0.09
   0   0   7    0.56    0.19
   0   0  -7    0.97    0.20
   0   0  -7    0.65    0.10
   0   0  -7    0.91    0.21
   1   0   7    0.13    0.13
  -1   0  -7    0.07    0.13
  -1   0  -7    0.03    0.04
  -1   0  -7    0.18    0.17
   2   0   7   -0.08    0.14
  -2   0  -7   -0.05    0.11
  -2   0  -7    0.01    0.03
  -2   0  -7   -0.03    0.13
  -3   0  -7   -0.03    0.12
   3   0   7   -0.06    0.11
  -3   0  -7   -0.03    0.13
  -4   0  -7   -0.13    0.15
   4   0   7    0.05    0.03
  -4   0  -7    0.03    0.16
  -5   0  -7   -0.05    0.14
   5   0   7   -0.01    0.03
  -5   0  -7    0.14    0.15
  -6   0  -7    0.14    0.18
   6   0   7    0.06    0.05
  -6   0  -7    0.04    0.16
  -7   0  -7    0.73    0.25
   7   0   7    0.33    0.07
  -7   0  -7    0.63    0.26
  -8   0  -7   -0.23    0.21
   8   0   7   -0.04    0.06
  -9   0  -7   -0.07    0.20
   9   0   7   -0.04    0.07
  -9   0  -7    0.00    0.21
 -10   0  -7   -0.55    0.27
 -10   0  -7    0.26    0.24
 -11   0  -7    0.00    0.23
 -12   0  -7   -0.18    0.24
 -13   0  -7    0.24    0.28
  13   0   7   -0.10    0.21
 -14   0  -7    0.05    0.24
  14   0   7    0.31    0.24
  15   0   7   -0.51    0.27
 -15   0  -7    0.38    0.30
  16   0   7    0.21    0.21
 -16   0  -7    0.53    0.35
  17   0   7    0.65    0.29
 -17   0  -7    0.19    0.31
 -18   0  -7    0.43    0.35
  25   1  -7    0.17    0.31
 -24  -1   7    0.14    0.25
  24   1  -7    0.49    0.28
  24  -1  -7    0.17    0.26
 -23   1   7    0.62    0.38
  23   1  -7    0.20    0.27
  23  -1  -7    0.35    0.29
 -23  -1   7   -0.38    0.32
 -22   1   7   -0.24    0.35
 -22  -1   7   -0.05    0.23
  22   1  -7   -0.02    0.24
  22  -1  -7    0.51    0.33
 -21   1   7    0.70    0.32
 -21  -1   7    0.03    0.26
  21   1  -7    1.01    0.29
  21  -1  -7    0.74    0.29
 -20   1   7    0.33    0.30
 -20  -1   7   -0.02    0.26
  20   1  -7   -0.15    0.20
  20  -1  -7    0.49    0.27
 -19   1   7    0.89    0.32
 -19  -1   7    1.05    0.30
  19   1  -7    1.13    0.29
  19  -1  -7    1.04    0.30
 -18  -1   7   -0.07    0.22
  18   1  -7    0.22    0.21
  18  -1  -7    0.18    0.23
 -18   1   7    0.10    0.24
 -17  -1   7    1.04    0.29
  17   1  -7    0.71    0.22
 -17   1   7    0.68    0.26
  17  -1  -7    1.49    0.33
 -16   1   7    4.01    0.46
  16   1  -7    4.01    0.43
 -16  -1   7    3.88    0.43
  16  -1  -7    3.74    0.43
 -15  -1   7    0.53    0.21
 -15   1   7    1.00    0.29
  15   1  -7    0.49    0.20
  15  -1  -7    0.69    0.23
 -14   1   7    0.22    0.16
 -14  -1   7    0.07    0.15
  14  -1  -7    0.12    0.17
  14   1  -7    0.22    0.18
 -13   1   7    3.76    0.40
 -13  -1   7    3.99    0.37
  13   1  -7    3.54    0.37
  13  -1  -7    3.27    0.38
  12   1  -7    0.56    0.18
 -12   1   7    0.69    0.20
 -12  -1   7    0.94    0.21
  12  -1  -7    0.64    0.20
 -11  -1   7    0.45    0.16
  11   1  -7    0.35    0.16
 -11   1   7    0.32    0.18
  11  -1  -7    0.48    0.18
  10   1  -7    0.01    0.12
  10  -1  -7    0.11    0.15
 -10  -1   7    0.19    0.12
   9   1  -7    4.98    0.35
   9   1  -7    4.46    0.37
  -9  -1   7    5.41    0.34
   9  -1  -7    4.82    0.37
   8  -1  -7    1.86    0.24
   8   1  -7    2.09    0.26
  -8  -1   7    1.65    0.20
   8   1  -7    1.87    0.20
   7  -1  -7    4.94    0.34
   7   1  -7    4.54    0.30
  -6   1   7    0.43    0.12
   6  -1  -7   -0.02    0.09
   6   1  -7    0.33    0.10
   6  -1  -7    0.25    0.11
  -6  -1   7    0.31    0.12
   5   1  -7    0.38    0.09
  -5  -1   7    0.42    0.12
   5   1  -7    0.44    0.12
   5   1  -7    0.48    0.14
  -5   1   7    0.46    0.12
   4   1  -7   10.45    0.48
   4   1  -7   10.54    0.39
  -4   1   7   10.35    0.46
  -4  -1   7   10.52    0.51
   4  -1  -7   10.31    0.44
   4   1  -7    9.79    0.43
   4  -1  -7   10.61    0.62
   3  -1  -7   60.07    1.01
   3   1  -7   56.59    1.00
  -3   1   7   58.29    1.05
   3   1  -7   57.77    1.12
   3  -1  -7   57.60    1.43
   2  -1  -7    0.96    0.21
  -2  -1   7    1.11    0.18
  -2   1   7    1.04    0.15
   2   1  -7    1.00    0.14
   2   1  -7    0.91    0.15
  -1   1   7    0.13    0.09
   1  -1  -7    0.17    0.15
  -1  -1   7    0.35    0.13
  -1   1   7    0.18    0.15
   1   1  -7    0.09    0.08
   1   1  -7    0.13    0.10
   1   1  -7    0.16    0.12
   0   1   7   26.60    0.66
   0   1  -7   26.35    0.65
   0   1  -7   25.66    0.78
   0  -1   7   26.25    0.56
   0  -1  -7   26.83    1.00
   0  -1   7   25.02    0.80
   0   1   7   26.63    0.98
   0   1  -7   24.67    0.67
   0  -1  -7   26.02    0.91
   1   1   7    8.99    0.38
  -1   1  -7    8.20    0.45
  -1   1  -7    7.88    0.36
   1  -1   7    8.46    0.33
  -1  -1  -7    8.45    0.57
   1  -1   7    8.28    0.47
  -1   1  -7    7.63    0.39
  -1  -1  -7    7.57    0.51
  -2   1  -7    4.05    0.34
   2   1   7    4.46    0.26
  -2   1  -7    4.29    0.25
   2  -1   7    4.05    0.23
  -2  -1  -7    4.59    0.44
   2  -1   7    4.19    0.35
  -2   1  -7    4.03    0.30
  -2  -1  -7    3.74    0.36
  -3   1  -7    5.52    0.42
  -3   1  -7    4.87    0.27
  -3  -1  -7    5.29    0.47
   3  -1   7    4.75    0.25
   3  -1   7    4.95    0.40
  -3   1  -7    4.94    0.34
  -3  -1  -7    4.96    0.43
   3  -1   7    4.42    0.33
  -4   1  -7    1.90    0.24
  -4  -1  -7    1.99    0.30
   4  -1   7    1.97    0.24
   4  -1   7    1.86    0.17
  -4   1  -7    2.13    0.29
  -4  -1  -7    1.53    0.27
  -5   1  -7    0.94    0.16
  -5  -1  -7    1.06    0.26
   5  -1   7    0.89    0.18
   5  -1   7    0.91    0.13
  -5   1  -7    0.85    0.22
  -5  -1  -7    0.85    0.24
  -6   1  -7    5.32    0.46
   6  -1   7    4.71    0.28
  -6  -1  -7    5.02    0.49
  -6   1  -7    4.23    0.37
  -6  -1  -7    4.09    0.44
  -7   1  -7    5.99    0.52
  -7  -1  -7    6.59    0.57
  -7   1  -7    5.41    0.44
   7  -1   7    5.63    0.31
  -7  -1  -7    5.45    0.51
  -8   1  -7    1.76    0.28
  -8  -1  -7    1.49    0.32
   8  -1   7    1.44    0.18
  -8  -1  -7    1.28    0.31
  -9  -1  -7    7.84    0.66
   9  -1   7    7.42    0.39
  -9   1  -7    7.61    0.55
  -9  -1  -7    7.67    0.62
 -10   1  -7    0.10    0.17
 -10  -1  -7   -0.11    0.27
  10  -1   7    0.18    0.10
 -10  -1  -7    0.25    0.24
  10   1   7    0.21    0.04
 -11  -1  -7   -0.08    0.25
  11   1   7    0.45    0.18
 -11  -1  -7    0.40    0.28
 -11   1  -7    0.46    0.25
 -12  -1  -7    0.10    0.27
  12   1   7    0.35    0.17
 -12  -1  -7    0.96    0.35
 -12   1  -7    0.69    0.28
 -13  -1  -7    0.06    0.23
  13   1   7   -0.20    0.18
 -13   1  -7    0.32    0.26
  14  -1   7   -0.19    0.26
 -14  -1  -7   -0.20    0.30
  14   1   7   -0.09    0.19
 -14   1  -7    0.32    0.28
 -15  -1  -7    0.63    0.34
  15  -1   7   -0.07    0.26
 -15   1  -7    0.60    0.33
 -16  -1  -7    0.13    0.33
  16  -1   7   -0.84    0.34
 -16   1  -7    0.25    0.32
  17  -1   7    0.18    0.25
 -17   1  -7    0.87    0.38
 -17  -1  -7    0.11    0.29
  18  -1   7   -0.16    0.26
 -18  -1  -7    0.55    0.37
  19  -1   7    0.20    0.30
  24   2  -7    0.02    0.25
  23   2  -7   -0.03    0.23
 -23  -2   7    0.27    0.31
  23  -2  -7    0.19    0.27
  22   2  -7    0.00    0.21
 -22   2   7   -0.02    0.29
 -22  -2   7   -0.09    0.29
  22  -2  -7    0.31    0.26
  21   2  -7   -0.03    0.23
 -21   2   7    0.01    0.27
 -21  -2   7    0.08    0.26
  21  -2  -7    0.49    0.32
  20   2  -7    0.21    0.21
 -20   2   7    0.21    0.28
 -20  -2   7   -0.19    0.25
  20  -2  -7   -0.08    0.25
  19   2  -7    0.98    0.28
 -19  -2   7    1.52    0.35
 -19   2   7    1.16    0.36
  19  -2  -7    1.21    0.32
  18   2  -7    0.12    0.19
 -18   2   7    0.19    0.27
 -18  -2   7    0.31    0.26
  18  -2  -7    0.18    0.27
  17   2  -7    0.58    0.24
 -17  -2   7    1.20    0.31
 -17   2   7    0.55    0.26
  17  -2  -7    0.73    0.28
  16   2  -7    3.56    0.40
 -16  -2   7    3.72    0.42
 -16   2   7    3.48    0.45
  16  -2  -7    3.21    0.43
  15   2  -7    0.33    0.18
 -15  -2   7   -0.06    0.18
 -15   2   7   -0.34    0.25
  15  -2  -7   -0.01    0.19
  14   2  -7    1.94    0.30
 -14   2   7    1.77    0.31
 -14  -2   7    2.22    0.31
  14  -2  -7    2.43    0.36
  13   2  -7    3.71    0.38
 -13  -2   7    3.48    0.36
  13  -2  -7    3.51    0.38
 -12  -2   7    3.00    0.31
  12  -2  -7    2.25    0.34
  12   2  -7    2.50    0.32
  11   2  -7    7.29    0.50
  11  -2  -7    8.22    0.52
 -11  -2   7    8.56    0.46
 -10  -2   7    2.69    0.26
  10   2  -7    2.75    0.32
  10  -2  -7    2.51    0.30
  -9  -2   7    0.59    0.14
   9   2  -7    0.64    0.19
   9  -2  -7    0.66    0.18
   9   2  -7    0.71    0.16
  -8  -2   7    7.81    0.36
   8   2  -7    8.55    0.51
   8  -2  -7    8.00    0.45
   8   2  -7    8.42    0.43
  -7  -2   7   28.01    0.64
   7   2  -7   28.05    0.90
   7  -2  -7   27.01    0.79
   7   2  -7   29.35    0.75
   6   2  -7   58.98    0.90
   6   2  -7   57.40    1.25
   6  -2  -7   59.81    1.11
  -6   2   7   56.72    1.20
   6   2  -7   60.31    0.96
   5   2  -7    2.28    0.15
   5  -2  -7    2.42    0.24
   5   2  -7    2.13    0.17
   5   2  -7    2.23    0.27
  -5   2   7    2.05    0.23
   5   2  -7    1.99    0.17
   4  -2  -7    0.50    0.22
   4   2  -7    0.55    0.08
   4  -2  -7    0.72    0.15
  -4   2   7    0.51    0.12
   4   2  -7    0.67    0.18
   4   2  -7    0.45    0.10
   3  -2  -7    1.16    0.26
   3   2  -7    1.15    0.10
   3  -2  -7    1.04    0.16
  -3   2   7    1.10    0.16
   3   2  -7    1.59    0.24
   3   2  -7    1.17    0.13
   2  -2  -7   95.49    1.19
   2  -2  -7   94.35    1.20
   2   2  -7   95.79    1.13
   2   2  -7   97.88    1.55
  -2  -2   7   94.30    1.35
  -2  -2   7   92.81    1.26
   2  -2  -7   96.38    2.02
  -2   2   7   96.39    1.26
   2   2  -7   93.70    0.84
   2   2  -7   94.60    0.95
   1  -2  -7    9.15    0.37
   1   2  -7    9.27    0.38
   1  -2  -7    8.84    0.35
   1   2  -7    9.24    0.48
  -1  -2   7    8.99    0.43
  -1  -2   7    9.26    0.42
   1  -2  -7    9.36    0.64
  -1   2   7    9.21    0.38
   1   2  -7    9.48    0.28
   1  -2  -7    9.86    0.62
   0  -2   7    0.92    0.15
   0  -2  -7    1.00    0.25
   0   2  -7    1.03    0.11
   0  -2  -7    0.96    0.22
   0  -2  -7    1.04    0.12
   0   2  -7    1.15    0.20
   0   2  -7    1.08    0.17
   0  -2   7    1.38    0.18
   0   2   7    1.16    0.14
  -1   2  -7    1.16    0.12
  -1  -2  -7    1.33    0.29
  -1   2  -7    1.13    0.18
  -1   2  -7    1.26    0.18
  -1  -2  -7    1.23    0.12
   1  -2   7    1.11    0.17
   1   2   7    1.25    0.13
   1  -2   7    1.16    0.19
  -1  -2  -7    1.27    0.28
  -2   2  -7    0.99    0.13
  -2  -2  -7    0.81    0.23
  -2   2  -7    0.96    0.17
   2   2   7    1.04    0.12
  -2   2  -7    1.03    0.19
  -2  -2  -7    0.97    0.09
   2  -2   7    0.88    0.15
   2  -2   7    1.06    0.20
  -2  -2  -7    1.05    0.26
  -3   2  -7    4.84    0.35
   3  -2   7    4.73    0.33
   3  -2   7    4.35    0.36
  -3  -2  -7    4.78    0.49
   3   2   7    4.53    0.22
  -3   2  -7    4.37    0.27
  -3  -2  -7    4.92    0.47
   3  -2   7    4.27    0.28
  -4  -2  -7    4.41    0.46
  -4   2  -7    4.64    0.34
   4   2   7    4.43    0.22
   4  -2   7    4.66    0.33
  -4  -2  -7    5.27    0.52
  -4   2  -7    4.76    0.30
   4  -2   7    4.45    0.31
  -5  -2  -7    4.82    0.48
   5   2   7    4.82    0.23
  -5   2  -7    4.65    0.31
  -5  -2  -7    4.45    0.46
   5  -2   7    4.93    0.34
   6   2   7    6.67    0.28
  -6  -2  -7    7.35    0.61
  -6   2  -7    7.28    0.42
  -6  -2  -7    7.39    0.62
   6  -2   7    7.28    0.45
  -7  -2  -7    1.80    0.36
   7  -2   7    2.27    0.29
  -7  -2  -7    2.03    0.37
  -7   2  -7    2.02    0.26
  -8  -2  -7    7.83    0.65
  -8   2  -7    7.85    0.49
  -8  -2  -7    6.45    0.61
   8   2   7    6.93    0.32
  -9  -2  -7    0.01    0.25
   9   2   7    0.16    0.09
  -9  -2  -7    0.11    0.23
  -9   2  -7    0.40    0.19
 -10  -2  -7    3.88    0.53
 -10  -2  -7    2.99    0.45
 -10   2  -7    3.88    0.41
  10   2   7    3.78    0.27
 -11  -2  -7   -0.20    0.27
 -11  -2  -7   -0.04    0.23
 -11   2  -7    0.12    0.22
 -12  -2  -7    0.44    0.29
 -12  -2  -7    1.33    0.37
 -12   2  -7    1.03    0.27
 -13  -2  -7    0.88    0.32
 -13  -2  -7    1.33    0.40
 -14  -2  -7    1.18    0.37
 -14  -2  -7    2.67    0.54
 -15  -2  -7    0.34    0.36
 -15   2  -7   -0.22    0.25
  15  -2   7   -0.18    0.29
 -16  -2  -7    0.41    0.33
  16  -2   7   -0.21    0.31
 -16   2  -7   -0.21    0.29
 -17  -2  -7    0.43    0.37
 -17   2  -7    0.20    0.28
  17  -2   7   -0.08    0.29
  18  -2   7    1.21    0.40
 -18   2  -7    1.40    0.39
 -23  -3   7    0.51    0.36
 -22  -3   7    0.03    0.24
  22   3  -7    0.86    0.40
  21  -3  -7    0.22    0.25
 -21   3   7   -0.08    0.29
 -21  -3   7    0.29    0.29
  21   3  -7    0.25    0.33
  20  -3  -7    2.70    0.51
 -20  -3   7    1.87    0.37
  20   3  -7    2.39    0.48
  19  -3  -7    1.61    0.39
 -19  -3   7    0.70    0.28
  19   3  -7    1.16    0.38
  18  -3  -7    0.15    0.22
 -18  -3   7    0.00    0.20
  18   3  -7    0.27    0.30
  17  -3  -7   -0.22    0.27
 -17  -3   7   -0.01    0.21
  17   3  -7    0.24    0.25
  16  -3  -7   -0.18    0.21
 -16  -3   7   -0.07    0.18
  16   3  -7    0.09    0.25
  15  -3  -7    4.93    0.51
 -15  -3   7    4.99    0.46
  15   3  -7    4.80    0.54
  14  -3  -7    1.10    0.31
 -14  -3   7    0.73    0.22
  14   3  -7    0.45    0.26
  13  -3  -7    0.53    0.23
 -13  -3   7    0.47    0.18
  13   3  -7    0.49    0.27
  12  -3  -7    1.59    0.29
 -12  -3   7    1.59    0.24
  12   3  -7    1.29    0.30
  12   3  -7    1.24    0.18
 -11  -3   7    4.25    0.34
  11   3  -7    4.14    0.27
  11  -3  -7    4.34    0.42
  11   3  -7    3.40    0.41
  10   3  -7    7.44    0.32
  10   3  -7    7.14    0.56
  10  -3  -7    8.31    0.53
 -10  -3   7    7.63    0.40
   9  -3  -7    0.76    0.21
   9   3  -7    0.50    0.16
  -9  -3   7    0.45    0.13
   9   3  -7    0.70    0.24
   9   3  -7    0.46    0.08
   8  -3  -7    1.13    0.22
   8   3  -7    0.77    0.16
  -8  -3   7    0.85    0.13
   8   3  -7    0.62    0.20
  -7  -3   7    2.65    0.18
   7   3  -7    2.19    0.33
   7   3  -7    2.56    0.24
   7  -3  -7    2.35    0.27
   6  -3  -7    2.85    0.29
   6   3  -7    2.43    0.33
   6   3  -7    2.63    0.21
   5  -3  -7    8.19    0.43
   5   3  -7    7.62    0.53
   5  -3  -7    7.84    0.64
   5   3  -7    7.65    0.30
   4   3  -7   12.60    0.67
   4  -3  -7   12.54    0.51
   4  -3  -7   13.09    0.80
   4   3  -7   11.25    0.27
  -4   3   7   12.12    0.56
   3  -3  -7    1.15    0.28
  -3   3   7    1.12    0.17
   3  -3  -7    1.01    0.17
   3  -3  -7    0.90    0.15
   3   3  -7    1.15    0.23
   2  -3  -7    0.22    0.20
  -2  -3   7    0.15    0.06
   2  -3  -7    0.16    0.08
  -2   3   7    0.10    0.08
   2  -3  -7    0.24    0.12
   2   3  -7    0.46    0.20
   1  -3  -7   17.50    0.94
   1  -3  -7   17.91    0.62
   1  -3  -7   18.20    0.50
   1   3  -7   18.25    0.79
  -1  -3   7   17.69    0.50
  -1   3   7   18.11    0.57
   1  -3  -7   19.10    0.94
   0  -3  -7    1.66    0.15
   0  -3  -7    1.36    0.28
   0  -3  -7    1.47    0.32
   0   3  -7    1.46    0.24
   0  -3  -7    1.93    0.21
   0   3   7    1.89    0.17
   0  -3   7    1.77    0.19
  -1  -3  -7    0.69    0.22
  -1  -3  -7    1.02    0.29
  -1   3  -7    0.94    0.07
   1   3   7    1.18    0.13
  -1   3  -7    1.00    0.23
  -1  -3  -7    1.21    0.18
   1  -3   7    1.20    0.18
  -2  -3  -7    4.02    0.46
  -2  -3  -7    3.69    0.25
   2  -3   7    3.90    0.32
  -2   3  -7    3.27    0.34
  -2   3  -7    3.55    0.18
  -2  -3  -7    2.93    0.42
  -3  -3  -7    0.43    0.25
  -3   3  -7    0.34    0.09
  -3   3  -7    0.14    0.16
  -3  -3  -7    0.20    0.08
   3  -3   7    0.26    0.13
  -3  -3  -7    0.75    0.29
  -4  -3  -7    0.24    0.21
   4  -3   7    0.57    0.10
  -4   3  -7    0.77    0.13
  -4   3  -7    0.91    0.22
  -4  -3  -7    0.65    0.11
  -4  -3  -7    0.75    0.28
  -5  -3  -7    0.37    0.26
   5  -3   7    0.47    0.11
  -5   3  -7    0.36    0.11
  -5   3  -7    0.40    0.20
  -5  -3  -7    0.69    0.27
  -6  -3  -7   -0.14    0.28
   6  -3   7    0.25    0.11
  -6   3  -7    0.37    0.15
  -6  -3  -7    0.03    0.23
  -7  -3  -7    3.17    0.46
  -7   3  -7    3.22    0.31
  -7  -3  -7    3.51    0.49
  -8   3  -7    7.28    0.47
   8   3   7    7.21    0.28
  -8  -3  -7    7.25    0.66
  -8  -3  -7    6.96    0.68
  -9  -3  -7    0.49    0.34
  -9   3  -7    0.34    0.18
  -9  -3  -7    0.20    0.25
 -10  -3  -7    2.15    0.43
 -10   3  -7    2.24    0.33
 -10  -3  -7    3.21    0.51
 -11  -3  -7    3.78    0.56
 -11  -3  -7    5.48    0.65
 -11   3  -7    4.33    0.43
 -12  -3  -7    0.93    0.34
 -12   3  -7    1.51    0.31
 -13  -3  -7   -0.01    0.28
 -13   3  -7    0.38    0.26
 -13  -3  -7    0.11    0.29
 -14  -3  -7    0.42    0.32
 -14   3  -7    1.09    0.32
 -14  -3  -7    1.30    0.39
 -15  -3  -7    2.21    0.50
  15  -3   7    2.84    0.53
 -15   3  -7    2.75    0.46
 -15  -3  -7    3.04    0.60
 -16   3  -7    2.79    0.47
  16  -3   7    2.79    0.51
 -17   3  -7    0.38    0.30
 -18   3  -7    0.26    0.30
 -21  -4   7    0.25    0.28
  21   4  -7   -0.35    0.36
  20  -4  -7   -0.21    0.32
 -20  -4   7    0.49    0.31
  20   4  -7   -0.09    0.31
  19  -4  -7   -0.54    0.35
 -19  -4   7    0.33    0.28
  19   4  -7   -0.07    0.32
  18  -4  -7    0.13    0.24
 -18  -4   7    0.14    0.22
  18   4  -7   -0.27    0.36
 -17  -4   7   -0.29    0.22
  17  -4  -7   -0.11    0.27
  17   4  -7    0.12    0.31
  16  -4  -7    2.76    0.43
 -16  -4   7    2.46    0.36
  16   4  -7    2.55    0.45
  15  -4  -7   -0.32    0.29
 -15  -4   7   -0.15    0.17
  15   4  -7   -0.02    0.25
  14  -4  -7    1.65    0.34
 -14  -4   7    2.16    0.31
  14   4  -7    1.69    0.36
  13  -4  -7    1.86    0.34
 -13  -4   7    2.02    0.28
  13   4  -7    1.77    0.36
  12  -4  -7   -0.01    0.17
 -12  -4   7    0.26    0.15
  11  -4  -7    0.04    0.18
 -11  -4   7    0.27    0.14
  11   4  -7    0.10    0.19
  10  -4  -7    0.69    0.22
 -10  -4   7    0.88    0.16
  10   4  -7    0.94    0.29
  -9  -4   7   12.56    0.45
   9   4  -7   12.82    0.80
   9  -4  -7   12.59    0.68
   8  -4  -7    1.80    0.29
   8   4  -7    1.68    0.24
   8   4  -7    1.77    0.32
  -8  -4   7    1.78    0.16
   7  -4  -7    1.25    0.23
  -7  -4   7    1.30    0.11
   7   4  -7    1.69    0.20
   7   4  -7    1.88    0.37
   6   4  -7   16.84    0.89
   6  -4  -7   16.99    1.00
   6  -4  -7   14.39    0.65
   6   4  -7   14.92    0.47
   5   4  -7   11.07    0.72
   5  -4  -7   10.04    0.77
   5  -4  -7   10.08    0.52
   4   4  -7   18.98    0.93
   4  -4  -7   18.93    0.65
   4  -4  -7   17.46    1.02
   3  -4  -7    5.32    0.58
   3   4  -7    5.07    0.50
   3  -4  -7    4.71    0.31
   2   4  -7   45.84    1.41
   2  -4  -7   45.38    0.88
   2  -4  -7   41.40    1.53
   2  -4  -7   42.37    1.54
   1   4  -7    7.88    0.61
   1  -4  -7    7.08    0.65
  -1  -4   7    6.76    0.24
   1  -4  -7    7.30    0.34
   1  -4  -7    7.11    0.63
   0  -4  -7    5.35    0.58
   0  -4  -7    6.11    0.61
   0   4  -7    6.69    0.54
   0  -4  -7    5.71    0.26
   0  -4   7    5.72    0.29
  -1  -4  -7    3.76    0.49
   1  -4   7    4.17    0.29
  -1   4  -7    3.38    0.41
  -1  -4  -7    4.12    0.52
  -2   4  -7    6.22    0.53
  -2  -4  -7    6.24    0.63
  -2  -4  -7    6.14    0.61
  -3  -4  -7    2.04    0.40
  -3   4  -7    1.53    0.30
  -3  -4  -7    1.83    0.38
  -4  -4  -7    2.07    0.40
  -4   4  -7    2.70    0.39
  -4  -4  -7    2.82    0.46
  -5   4  -7    8.33    0.38
  -5   4  -7    8.22    0.61
  -5  -4  -7    9.00    0.75
  -5  -4  -7    9.84    0.79
  -6   4  -7    8.38    0.42
  -6  -4  -7    7.49    0.67
  -6  -4  -7    9.04    0.77
  -7   4  -7    0.17    0.13
  -7  -4  -7    0.22    0.25
  -7  -4  -7    0.16    0.24
  -8   4  -7    8.72    0.50
  -8  -4  -7    8.70    0.75
  -8  -4  -7    8.26    0.79
  -9  -4  -7    3.36    0.55
  -9  -4  -7    3.89    0.55
 -10  -4  -7    4.41    0.61
 -10  -4  -7    3.91    0.54
 -11  -4  -7    1.10    0.42
 -11  -4  -7    0.92    0.37
 -12  -4  -7    2.35    0.51
 -12  -4  -7    2.46    0.50
 -13  -4  -7    1.30    0.42
 -13  -4  -7    1.45    0.41
 -14  -4  -7   -0.01    0.35
 -14  -4  -7    0.33    0.31
 -15  -4  -7    0.72    0.42
  18   5  -7    0.21    0.34
  17  -5  -7    0.07    0.27
  17   5  -7    0.36    0.37
  16  -5  -7    0.81    0.30
  16   5  -7    1.03    0.44
  15  -5  -7    0.10    0.25
  15   5  -7    0.50    0.35
  14  -5  -7    1.24    0.33
  14   5  -7    1.55    0.46
  13  -5  -7    4.40    0.51
  13   5  -7    5.65    0.66
  12  -5  -7    2.56    0.40
  12   5  -7    2.95    0.53
  11  -5  -7    1.35    0.30
  11   5  -7    1.73    0.42
  10  -5  -7    0.01    0.19
  10   5  -7    0.07    0.24
   9  -5  -7    0.51    0.22
   9   5  -7    0.88    0.36
   8  -5  -7    3.26    0.37
   8   5  -7    3.24    0.49
   7  -5  -7    0.73    0.22
   7  -5  -7    0.28    0.29
   7   5  -7    1.07    0.33
   6  -5  -7    0.93    0.24
   6   5  -7    0.40    0.25
   6  -5  -7    0.39    0.25
   5  -5  -7    3.94    0.58
   5   5  -7    4.02    0.52
   5  -5  -7    3.20    0.34
   4  -5  -7   -0.08    0.29
   4  -5  -7    0.02    0.23
   4   5  -7   -0.03    0.22
   4  -5  -7    0.08    0.12
   3  -5  -7    0.04    0.27
   3  -5  -7   -0.19    0.31
   3   5  -7   -0.11    0.26
   3  -5  -7    0.21    0.14
   2  -5  -7   -0.01    0.25
   2  -5  -7    0.27    0.27
   2   5  -7   -0.10    0.29
   2  -5  -7    0.15    0.11
   1  -5  -7    1.99    0.42
   1  -5  -7    1.50    0.38
   1   5  -7    1.90    0.36
   0  -5  -7    0.91    0.33
   0  -5  -7    0.87    0.33
   0   5  -7    1.02    0.31
  -1  -5  -7    0.17    0.23
  -1   5  -7    0.00    0.25
  -1  -5  -7    0.20    0.25
  -2   5  -7    0.40    0.28
  -2  -5  -7    0.41    0.31
  -2  -5  -7    0.17    0.25
  -3   5  -7    0.66    0.27
  -3  -5  -7    0.84    0.31
  -3  -5  -7    0.67    0.31
  -4  -5  -7    4.41    0.58
  -4   5  -7    5.16    0.56
  -4  -5  -7    5.23    0.63
  -5  -5  -7    0.99    0.34
  -5   5  -7    1.55    0.35
  -5  -5  -7    1.98    0.41
  -6  -5  -7    0.46    0.28
  -6  -5  -7    0.11    0.25
  -7  -5  -7   -0.01    0.28
  -7  -5  -7   -0.05    0.28
  -8  -5  -7    1.14    0.43
  -8  -5  -7    1.41    0.38
  -9  -5  -7    4.37    0.63
  -9  -5  -7    4.18    0.59
 -10  -5  -7    0.71    0.38
 -10  -5  -7    0.43    0.33
 -11  -5  -7    0.54    0.35
 -11  -5  -7    0.45    0.32
 -12  -5  -7    1.36    0.43
 -12  -5  -7    1.84    0.47
 -13  -5  -7    1.04    0.41
 -14  -5  -7    0.30    0.34
  15  -6  -7    0.39    0.30
  14  -6  -7    0.00    0.26
  14   6  -7    0.94    0.43
  13  -6  -7    1.75    0.40
  13   6  -7    1.66    0.45
  12  -6  -7    0.22    0.24
  12   6  -7   -0.01    0.29
  11   6  -7   -0.30    0.35
  11  -6  -7    0.50    0.28
  10  -6  -7    0.50    0.25
  10   6  -7    0.57    0.37
   9  -6  -7    1.49    0.31
   9  -6  -7    2.20    0.51
   9   6  -7    2.49    0.51
   8  -6  -7    0.76    0.27
   8  -6  -7    0.63    0.38
   8   6  -7    0.51    0.30
   7  -6  -7    1.32    0.28
   7  -6  -7    1.96    0.51
   7   6  -7    1.67    0.44
   6  -6  -7    2.62    0.49
   6   6  -7    3.15    0.54
   6  -6  -7    2.69    0.53
   5  -6  -7    1.25    0.40
   5  -6  -7    1.96    0.47
   5   6  -7    1.68    0.42
   4  -6  -7    3.10    0.56
   4  -6  -7    3.22    0.54
   4   6  -7    3.45    0.52
   3  -6  -7    3.03    0.55
   3  -6  -7    2.44    0.49
   3   6  -7    2.74    0.52
   2  -6  -7    4.11    0.61
   2   6  -7    3.41    0.53
   2  -6  -7    3.64    0.56
   1  -6  -7    2.14    0.47
   1  -6  -7    3.28    0.54
   1   6  -7    2.28    0.45
   0  -6  -7    1.36    0.36
   0  -6  -7    2.25    0.49
   0   6  -7    2.51    0.48
  -1  -6  -7    2.81    0.54
  -1   6  -7    2.77    0.49
  -1  -6  -7    2.46    0.48
  -2  -6  -7    2.42    0.51
  -2   6  -7    2.10    0.45
  -2  -6  -7    2.19    0.46
  -3  -6  -7    3.67    0.59
  -3   6  -7    5.16    0.64
  -3  -6  -7    4.95    0.65
  -4  -6  -7    2.79    0.52
  -4   6  -7    3.12    0.52
  -4  -6  -7    3.62    0.57
  -5  -6  -7    4.42    0.65
  -5  -6  -7    4.64    0.59
  -6  -6  -7    4.69    0.67
  -6  -6  -7    3.58    0.56
  -7  -6  -7    1.34    0.47
  -7  -6  -7    0.54    0.33
  -8  -6  -7    0.56    0.37
  -8  -6  -7    0.50    0.30
  -9  -6  -7    1.15    0.47
  -9  -6  -7    0.43    0.30
  12  -7  -7    2.47    0.54
  11  -7  -7    0.71    0.38
  10  -7  -7    0.14    0.28
   9  -7  -7   -0.49    0.39
   8  -7  -7   -0.09    0.29
   7  -7  -7    1.92    0.49
   7  -7  -7    1.74    0.45
   6  -7  -7    0.53    0.39
   6  -7  -7    0.57    0.36
   5  -7  -7    0.07    0.34
   5  -7  -7    0.37    0.28
   4  -7  -7   -0.48    0.36
   4  -7  -7    0.25    0.31
   3  -7  -7    0.56    0.37
   2  -7  -7    0.84    0.38
   1  -7  -7    1.19    0.45
   0  -7  -7    0.24    0.35
  -1  -7  -7   -0.01    0.31
  -2  -7  -7    0.34    0.39
  -3  -7  -7    0.22    0.34
  -4  -7  -7    1.13    0.42
  -5  -7  -7    0.97    0.42
  24   0  -8    0.22    0.27
 -23   0   8    0.23    0.26
  23   0  -8    0.20    0.28
 -22   0   8    0.52    0.32
  22   0  -8    0.23    0.26
  21   0  -8    0.54    0.27
 -21   0   8    0.21    0.26
  20   0  -8    1.60    0.36
 -20   0   8    1.66    0.38
 -19   0   8    0.75    0.28
  19   0  -8    1.07    0.29
 -18   0   8    2.99    0.43
  18   0  -8    3.52    0.44
 -17   0   8    0.15    0.24
  17   0  -8    0.29    0.22
  16   0  -8    7.06    0.56
 -16   0   8    6.91    0.58
 -15   0   8    9.24    0.62
  15   0  -8    8.23    0.57
 -14   0   8    0.94    0.23
  14   0  -8    1.48    0.27
 -13   0   8    2.63    0.34
  13   0  -8    2.39    0.32
 -12   0   8   26.02    0.91
  12   0  -8   25.31    0.90
 -11   0   8   39.28    1.09
  11   0  -8   37.82    1.07
  10   0  -8   25.66    0.85
   9   0  -8   23.82    0.81
   8   0  -8  101.86    1.64
   7   0  -8   77.10    1.38
   7   0  -8   82.52    1.42
   6   0  -8   37.13    0.95
   6   0  -8   36.64    0.94
  -5   0   8  120.30    1.76
   5   0  -8  119.28    1.98
  -4   0   8   57.13    1.19
   4   0  -8   56.04    1.34
  -3   0   8   57.15    1.16
   3   0  -8   55.60    1.34
  -2   0   8   76.34    1.33
   2   0  -8   76.71    1.59
  -2   0   8   79.26    1.62
  -1   0   8  121.38    1.64
   1   0  -8  121.44    1.14
   1   0  -8  121.37    2.02
  -1   0   8  126.48    2.05
   1   0  -8  122.42    1.88
   0   0  -8  122.65    1.10
   0   0  -8  124.14    2.06
   0   0   8  125.14    2.09
   0   0  -8  127.63    1.92
  -1   0  -8   90.82    0.87
  -1   0  -8   91.05    1.79
  -1   0  -8   90.77    1.65
  -2   0  -8   26.58    0.43
  -2   0  -8   27.18    0.99
  -2   0  -8   25.40    0.90
  -3   0  -8   33.34    1.13
  -3   0  -8   35.09    1.07
  -4   0  -8   25.26    1.00
  -4   0  -8   24.55    0.94
  -5   0  -8   33.50    1.17
  -5   0  -8   31.50    1.09
  -6   0  -8   30.03    1.15
   6   0   8   29.50    0.36
  -6   0  -8   31.63    1.11
  -7   0  -8    1.68    0.31
   7   0   8    1.21    0.09
  -7   0  -8    1.91    0.38
  -8   0  -8    0.97    0.25
   8   0   8    1.02    0.10
  -8   0  -8    1.32    0.32
  -9   0  -8   20.41    1.05
  -9   0  -8   19.43    0.95
 -10   0  -8    2.80    0.42
 -10   0  -8    2.51    0.41
 -11   0  -8    3.06    0.45
 -11   0  -8    3.62    0.55
 -12   0  -8   -0.07    0.23
 -13   0  -8    6.58    0.65
  13   0   8    5.85    0.53
 -14   0  -8    0.86    0.33
  14   0   8    0.78    0.22
  15   0   8    0.77    0.27
 -15   0  -8    1.16    0.41
  16   0   8    0.26    0.22
 -16   0  -8    1.38    0.43
 -17   0  -8    0.93    0.39
 -18   0  -8    0.38    0.34
  25   1  -8    1.40    0.39
  24   1  -8    0.65    0.33
 -24  -1   8    1.59    0.43
  24  -1  -8    1.18    0.39
 -23   1   8    0.09    0.29
  23   1  -8   -0.28    0.25
 -23  -1   8    0.29    0.33
  23  -1  -8    0.61    0.33
 -22   1   8    0.06    0.31
 -22  -1   8   -0.01    0.26
  22   1  -8    0.33    0.26
  22  -1  -8   -0.09    0.25
 -21   1   8    2.24    0.45
  21   1  -8    3.03    0.46
 -21  -1   8    2.34    0.41
  21  -1  -8    2.52    0.45
  20   1  -8    1.55    0.35
 -20   1   8    1.33    0.37
 -20  -1   8    2.15    0.40
  20  -1  -8    1.18    0.33
 -19  -1   8    5.23    0.55
  19   1  -8    5.59    0.54
  19  -1  -8    4.99    0.52
 -19   1   8    4.98    0.56
 -18   1   8    4.99    0.55
 -18  -1   8    5.33    0.53
  18   1  -8    5.48    0.53
  18  -1  -8    4.89    0.51
  17   1  -8   28.90    1.11
  17  -1  -8   28.73    1.14
 -17  -1   8   31.80    1.19
 -17   1   8   31.24    1.23
 -16   1   8    1.55    0.34
  16   1  -8    1.42    0.28
 -16  -1   8    1.32    0.29
  16  -1  -8    1.76    0.33
 -15  -1   8    8.89    0.59
  15   1  -8    8.60    0.58
  15  -1  -8    8.95    0.61
 -15   1   8    7.83    0.60
 -14   1   8    7.56    0.58
 -14  -1   8    8.30    0.56
  14   1  -8    6.41    0.50
  14  -1  -8    6.75    0.53
 -13   1   8   16.75    0.80
 -13  -1   8   17.46    0.75
  13   1  -8   15.42    0.75
  13  -1  -8   16.48    0.77
 -12  -1   8    9.70    0.54
  12   1  -8    8.71    0.55
  12  -1  -8    7.98    0.52
 -11  -1   8   11.67    0.57
  11   1  -8   12.32    0.63
  11  -1  -8   11.80    0.61
 -10  -1   8    4.11    0.32
  10   1  -8    3.91    0.36
  10  -1  -8    4.95    0.40
   9   1  -8    1.12    0.22
   9   1  -8    1.30    0.20
   9  -1  -8    1.17    0.21
   8   1  -8   26.53    0.76
   8  -1  -8   28.55    0.84
   7   1  -8   22.28    0.66
   7  -1  -8   21.82    0.72
   6  -1  -8    0.57    0.16
   6   1  -8    0.53    0.12
   6   1  -8    0.61    0.15
   5   1  -8    7.18    0.36
   5  -1  -8    8.02    0.42
   5   1  -8    7.40    0.40
  -5   1   8    7.96    0.45
   5   1  -8    8.00    0.45
   5  -1  -8    7.35    0.57
   4  -1  -8   29.92    0.80
   4   1  -8   29.23    0.75
  -4   1   8   29.94    0.82
   4   1  -8   30.51    0.88
   4  -1  -8   28.63    1.06
   3   1  -8    0.43    0.14
   3  -1  -8    0.83    0.24
  -3   1   8    0.64    0.14
   3   1  -8    0.41    0.12
   3  -1  -8    0.46    0.13
   2   1  -8   15.13    0.54
  -2   1   8   15.11    0.57
   2   1  -8   16.24    0.65
   2  -1  -8   15.00    0.80
  -2  -1   8   15.94    0.66
  -1   1   8   31.28    0.79
   1   1  -8   30.59    0.74
   1   1  -8   30.63    0.90
   1  -1  -8   29.25    1.10
  -1  -1   8   29.57    0.92
   1   1  -8   31.21    0.82
   1  -1  -8   30.31    1.04
   0   1  -8   35.78    0.99
   0  -1  -8   34.12    1.20
   0  -1   8   34.58    1.01
   0   1   8   34.51    0.83
   0   1  -8   34.72    0.77
   0   1  -8   33.69    0.86
   0  -1  -8   34.14    1.12
  -1   1  -8   46.85    1.16
   1   1   8   48.21    0.96
  -1   1  -8   45.76    0.87
  -1  -1  -8   46.36    1.38
   1  -1   8   46.25    0.76
   1  -1   8   46.15    1.21
  -1   1  -8   45.71    1.02
  -1  -1  -8   45.58    1.31
   2   1   8   27.19    0.70
  -2   1  -8   25.75    0.63
  -2   1  -8   27.27    0.92
  -2  -1  -8   25.60    1.04
   2  -1   8   27.85    0.60
  -2   1  -8   25.84    0.80
  -2  -1  -8   26.63    1.01
  -3   1  -8   20.76    0.56
  -3   1  -8   19.54    0.82
   3  -1   8   20.65    0.52
  -3  -1  -8   21.89    0.97
  -3   1  -8   21.84    0.75
  -3  -1  -8   21.61    0.92
  -4   1  -8   50.15    1.32
  -4  -1  -8   48.20    1.46
   4  -1   8   50.54    0.83
  -4   1  -8   49.23    1.18
  -4  -1  -8   48.85    1.41
   4  -1   8   48.29    1.20
  -5   1  -8   28.19    1.05
  -5  -1  -8   28.93    1.15
   5  -1   8   28.23    0.63
  -5   1  -8   28.48    0.93
  -5  -1  -8   28.37    1.10
  -6   1  -8   55.91    1.52
  -6  -1  -8   59.60    1.68
   6  -1   8   56.34    0.94
  -6   1  -8   55.84    1.35
  -6  -1  -8   55.54    1.60
  -7   1  -8   10.45    0.72
  -7  -1  -8   12.17    0.79
   7  -1   8   11.40    0.44
  -7   1  -8   12.02    0.65
  -7  -1  -8   12.17    0.77
  -8   1  -8   16.02    0.88
  -8  -1  -8   15.48    0.90
   8  -1   8   16.22    0.53
  -8   1  -8   15.55    0.78
  -8  -1  -8   15.64    0.90
  -9  -1  -8   10.28    0.76
  -9   1  -8    8.48    0.62
  -9  -1  -8    9.00    0.72
 -10  -1  -8   19.80    1.08
 -10   1  -8   20.76    0.95
 -10  -1  -8   20.33    1.06
 -11  -1  -8   25.08    1.23
 -11   1  -8   22.80    1.04
 -11  -1  -8   23.10    1.16
  11   1   8   23.72    0.89
 -12  -1  -8    8.59    0.78
 -12   1  -8    8.39    0.66
 -12  -1  -8    7.93    0.73
  12   1   8    8.56    0.58
 -13  -1  -8    7.99    0.82
 -13   1  -8    7.75    0.68
 -13  -1  -8    8.03    0.76
  13   1   8    8.21    0.59
 -14  -1  -8    5.48    0.66
  14  -1   8    5.09    0.56
 -14   1  -8    6.63    0.67
 -15  -1  -8    5.37    0.69
  15  -1   8    5.05    0.57
 -15   1  -8    4.82    0.58
 -16  -1  -8    3.50    0.61
  16  -1   8    3.56    0.51
 -16   1  -8    3.61    0.53
  17  -1   8    1.17    0.34
 -17   1  -8    1.19    0.42
 -17  -1  -8    1.27    0.43
  18  -1   8    1.33    0.40
  24   2  -8   -0.09    0.26
 -24  -2   8   -0.19    0.31
  23   2  -8    0.64    0.28
 -23  -2   8   -0.04    0.30
  23  -2  -8    0.85    0.39
  22   2  -8   -0.07    0.24
 -22  -2   8    0.17    0.29
  22  -2  -8    0.47    0.34
  21   2  -8    0.11    0.20
 -21   2   8    0.21    0.30
 -21  -2   8    0.12    0.22
  21  -2  -8    0.01    0.22
  20   2  -8    1.17    0.32
 -20   2   8    0.95    0.30
 -20  -2   8    1.28    0.34
  20  -2  -8    2.12    0.42
  19   2  -8    2.38    0.37
 -19   2   8    2.20    0.42
 -19  -2   8    2.83    0.43
  19  -2  -8    2.58    0.42
  18   2  -8   -0.42    0.26
 -18   2   8   -0.59    0.33
 -18  -2   8    0.29    0.25
  18  -2  -8    0.01    0.20
  17   2  -8    1.88    0.32
 -17  -2   8    2.50    0.36
 -17   2   8    1.74    0.37
  17  -2  -8    2.48    0.40
 -16  -2   8    0.36    0.19
  16  -2  -8    0.76    0.30
  15   2  -8   -0.20    0.22
 -15  -2   8    0.42    0.21
  15  -2  -8    0.22    0.21
 -14  -2   8    5.16    0.44
  14   2  -8    5.78    0.49
  14  -2  -8    4.74    0.46
 -13  -2   8   12.45    0.63
  13   2  -8   10.82    0.66
  13  -2  -8   11.59    0.68
 -12  -2   8    6.73    0.44
  12  -2  -8    6.84    0.52
 -11  -2   8    0.40    0.15
  11   2  -8    0.79    0.22
  11  -2  -8    0.47    0.19
 -10  -2   8    5.11    0.35
  10   2  -8    4.75    0.43
  10  -2  -8    4.98    0.42
  -9  -2   8   52.34    1.02
   9   2  -8   48.01    1.24
   9  -2  -8   53.78    1.23
   9   2  -8   53.87    1.17
   8   2  -8   66.29    1.42
   8  -2  -8   66.12    1.31
   8   2  -8   66.69    1.22
   7   2  -8   75.14    1.50
   7  -2  -8   79.81    1.39
   7   2  -8   75.96    1.18
   7   2  -8   78.40    1.22
   6   2  -8   82.92    1.06
   6   2  -8   81.00    1.53
   6  -2  -8   86.21    1.37
   6   2  -8   81.00    1.19
   5   2  -8    5.49    0.26
   5  -2  -8    5.17    0.35
   5   2  -8    5.29    0.40
   5   2  -8    5.19    0.30
   5  -2  -8    5.77    0.54
  -5   2   8    5.39    0.37
   4   2  -8   91.74    0.98
   4  -2  -8   91.09    1.35
   4   2  -8   92.52    1.60
   4   2  -8   89.89    1.21
   4  -2  -8   94.31    2.06
  -4   2   8   93.04    1.44
   3   2  -8  100.55    1.01
   3  -2  -8  103.11    1.38
   3   2  -8  100.10    1.29
   3   2  -8  100.37    1.64
   3  -2  -8  101.47    2.15
  -3   2   8  102.49    1.45
   2  -2  -8   45.04    0.89
   2   2  -8   43.61    0.89
   2   2  -8   45.46    1.10
   2  -2  -8   44.69    1.46
  -2  -2   8   45.52    0.97
  -2   2   8   46.22    0.94
   2   2  -8   43.59    0.74
   1  -2  -8   17.61    0.48
   1   2  -8   17.11    0.58
   1   2  -8   18.15    0.69
   1  -2  -8   18.32    0.95
  -1  -2   8   17.45    0.64
  -1   2   8   18.14    0.57
   1   2  -8   18.05    0.46
   1  -2  -8   16.23    0.85
   0   2  -8   41.04    0.95
   0  -2  -8   43.92    0.70
   0   2  -8   43.85    1.06
   0  -2  -8   44.30    1.46
   0  -2   8   42.63    1.04
   0   2   8   42.31    0.83
   0   2  -8   42.58    0.74
   0  -2  -8   41.78    1.33
  -1   2  -8   12.73    0.55
  -1   2  -8   12.42    0.57
  -1  -2  -8   11.36    0.32
   1  -2   8   11.93    0.50
  -1  -2  -8   11.95    0.78
   1  -2   8   11.21    0.56
   1   2   8   11.91    0.43
  -1   2  -8   10.84    0.40
  -1  -2  -8   11.08    0.72
  -2   2  -8   11.14    0.57
  -2   2  -8   12.59    0.56
  -2  -2  -8   11.16    0.25
   2  -2   8   11.96    0.51
  -2  -2  -8   13.13    0.80
   2  -2   8   12.91    0.63
   2   2   8   11.68    0.42
  -2   2  -8   11.59    0.43
  -2  -2  -8   11.07    0.72
  -3   2  -8   26.12    0.91
  -3   2  -8   27.49    0.81
   3   2   8   26.55    0.62
  -3  -2  -8   27.13    1.17
  -3   2  -8   25.46    0.68
  -3  -2  -8   25.51    1.09
  -4   2  -8   42.76    1.02
   4   2   8   41.99    0.76
  -4  -2  -8   44.77    1.48
  -4   2  -8   43.33    0.94
  -4  -2  -8   41.89    1.41
   4  -2   8   43.40    1.00
  -5   2  -8    0.43    0.14
   5   2   8    0.38    0.10
  -5  -2  -8    0.28    0.24
   5  -2   8    0.34    0.13
  -5  -2  -8    0.05    0.23
  -6   2  -8    1.07    0.21
   6   2   8    0.96    0.13
  -6  -2  -8    0.62    0.28
   6  -2   8    0.77    0.18
  -6  -2  -8    1.29    0.34
   7   2   8   19.83    0.53
  -7  -2  -8   21.94    1.09
  -7   2  -8   20.79    0.77
  -7  -2  -8   19.16    1.04
  -8  -2  -8    1.33    0.36
  -8  -2  -8    1.70    0.38
   8   2   8    1.38    0.17
  -8   2  -8    1.84    0.29
  -9  -2  -8    1.44    0.32
   9   2   8    1.72    0.19
  -9  -2  -8    1.63    0.39
  -9   2  -8    1.66    0.29
 -10  -2  -8    0.91    0.33
 -10  -2  -8    0.46    0.32
 -10   2  -8    0.59    0.22
 -11  -2  -8    0.46    0.24
 -11  -2  -8    0.68    0.34
 -11   2  -8    0.95    0.27
 -12  -2  -8    1.08    0.33
 -12  -2  -8    2.11    0.44
 -12   2  -8    1.72    0.34
 -13  -2  -8   -0.51    0.37
 -13  -2  -8    0.09    0.27
 -14  -2  -8    0.67    0.35
 -14  -2  -8    1.40    0.47
 -15  -2  -8    1.46    0.44
  15  -2   8    1.05    0.35
 -15   2  -8    1.20    0.35
 -16  -2  -8    2.74    0.58
 -16   2  -8    2.17    0.43
  16  -2   8    1.45    0.41
 -17   2  -8    1.20    0.38
  17  -2   8    0.81    0.37
 -18   2  -8    0.38    0.28
 -23  -3   8    0.30    0.29
 -22  -3   8    0.71    0.34
  22   3  -8    0.47    0.35
  21   3  -8    1.59    0.46
 -21  -3   8    0.48    0.31
  21  -3  -8    0.61    0.37
 -20  -3   8    0.59    0.28
  20   3  -8    1.37    0.43
  20  -3  -8    0.62    0.33
 -19  -3   8    1.57    0.35
  19   3  -8    1.47    0.43
  19  -3  -8    1.47    0.38
 -18  -3   8    0.62    0.26
  18   3  -8    0.80    0.32
  18  -3  -8    0.76    0.30
 -17  -3   8    8.18    0.62
  17   3  -8    8.01    0.72
  17  -3  -8    7.11    0.64
  16  -3  -8    2.18    0.40
 -16  -3   8    2.39    0.36
  16   3  -8    2.44    0.45
  15  -3  -8    0.25    0.22
 -15  -3   8    0.06    0.18
  15   3  -8    0.15    0.26
 -14  -3   8    5.44    0.45
  14   3  -8    5.80    0.57
  14  -3  -8    5.01    0.50
 -13  -3   8   19.45    0.75
  13   3  -8   17.68    0.93
  13  -3  -8   17.70    0.86
 -12  -3   8    0.77    0.18
  12   3  -8    0.85    0.27
  12  -3  -8    0.77    0.27
 -11  -3   8    1.32    0.20
  11   3  -8    0.81    0.26
  11   3  -8    1.28    0.16
  11  -3  -8    1.17    0.26
  10   3  -8   11.72    0.37
  10   3  -8   12.06    0.73
  10  -3  -8   11.93    0.65
 -10  -3   8   11.74    0.49
  -9  -3   8   10.19    0.42
   9   3  -8    9.44    0.27
   9   3  -8    9.63    0.64
   9   3  -8    9.72    0.31
   9  -3  -8   10.10    0.57
   9   3  -8    9.30    0.50
   8   3  -8    0.41    0.13
   8   3  -8    0.18    0.19
   8  -3  -8    0.49    0.19
   7   3  -8    0.04    0.09
   7   3  -8    0.13    0.18
   7  -3  -8    0.16    0.16
   6  -3  -8    3.22    0.45
   6   3  -8    2.81    0.36
   6  -3  -8    1.96    0.26
   6   3  -8    2.39    0.20
   5   3  -8    0.44    0.08
   5  -3  -8    0.28    0.22
   5  -3  -8    0.46    0.13
   5   3  -8    0.59    0.23
   4  -3  -8    2.62    0.25
   4   3  -8    2.48    0.34
   4  -3  -8    3.00    0.43
  -4   3   8    2.58    0.26
   4   3  -8    2.32    0.12
   3  -3  -8    3.64    0.46
   3  -3  -8    3.30    0.30
   3   3  -8    3.67    0.38
  -3   3   8    3.23    0.29
   3  -3  -8    3.53    0.28
   2  -3  -8   11.21    0.50
   2  -3  -8   11.86    0.46
   2   3  -8   12.36    0.68
   2  -3  -8   12.82    0.86
  -2  -3   8   12.26    0.43
  -2   3   8   12.15    0.50
   2  -3  -8   12.14    0.80
  -1  -3   8   10.82    0.45
   1  -3  -8   10.21    0.41
   1  -3  -8   10.42    0.47
   1   3  -8   11.01    0.64
   1  -3  -8   10.93    0.79
  -1   3   8   10.71    0.45
   1  -3  -8   10.41    0.73
   0   3  -8   10.21    0.61
   0  -3  -8    9.47    0.43
   0  -3   8    9.42    0.46
   0  -3  -8    8.53    0.70
   0   3   8   10.02    0.39
   0  -3  -8   10.05    0.73
  -1   3  -8   14.75    0.31
  -1   3  -8   15.60    0.74
  -1  -3  -8   15.14    0.51
   1  -3   8   16.11    0.64
  -1  -3  -8   16.23    0.94
   1   3   8   16.37    0.45
  -1  -3  -8   15.79    0.91
  -2   3  -8   11.34    0.34
  -2   3  -8   11.54    0.63
  -2  -3  -8   10.38    0.39
   2  -3   8   11.18    0.57
  -2  -3  -8   11.11    0.81
   2   3   8   11.18    0.34
  -2  -3  -8   11.79    0.81
  -3   3  -8   14.19    0.44
  -3   3  -8   14.93    0.71
  -3  -3  -8   14.28    0.41
  -3  -3  -8   14.68    0.92
  -3  -3  -8   15.01    0.92
   3   3   8   14.11    0.28
  -4   3  -8   39.01    0.82
  -4   3  -8   40.39    1.16
  -4  -3  -8   40.24    1.52
  -4  -3  -8   38.97    1.47
  -5   3  -8   17.89    0.78
  -5  -3  -8   16.78    1.00
  -5  -3  -8   19.23    1.05
  -5   3  -8   17.62    0.60
  -6  -3  -8    2.58    0.43
  -6   3  -8    3.30    0.30
  -6  -3  -8    2.98    0.46
  -7  -3  -8    2.90    0.47
  -7   3  -8    3.26    0.32
  -7  -3  -8    2.80    0.47
  -8   3  -8   20.27    0.79
  -8  -3  -8   21.77    1.17
  -8  -3  -8   20.40    1.16
  -9   3  -8   12.01    0.65
  -9  -3  -8   11.73    0.89
  -9  -3  -8   12.51    0.94
 -10   3  -8    5.71    0.50
 -10  -3  -8    6.92    0.71
 -10  -3  -8    6.70    0.72
 -11   3  -8    8.89    0.63
 -11  -3  -8    8.57    0.79
 -11  -3  -8    8.60    0.82
 -12  -3  -8    5.81    0.70
 -12   3  -8    5.29    0.52
 -12  -3  -8    6.48    0.72
 -13  -3  -8    4.84    0.67
 -13   3  -8    5.20    0.53
 -13  -3  -8    4.73    0.66
 -14  -3  -8    2.00    0.49
 -14   3  -8    2.10    0.41
 -14  -3  -8    2.61    0.55
 -15   3  -8    0.49    0.26
 -15  -3  -8    1.07    0.42
 -16   3  -8    0.41    0.30
  20   4  -8    0.01    0.33
  19  -4  -8    0.25    0.31
  19   4  -8    0.27    0.31
  18  -4  -8   -0.01    0.23
 -18  -4   8    0.00    0.21
  18   4  -8   -0.34    0.36
  17  -4  -8    0.48    0.31
 -17  -4   8    0.02    0.20
  17   4  -8   -0.21    0.32
  16  -4  -8    1.73    0.38
 -16  -4   8    1.86    0.32
  16   4  -8    1.42    0.39
  15  -4  -8    0.36    0.27
 -15  -4   8    0.65    0.23
  15   4  -8    0.46    0.28
  14  -4  -8    0.16    0.20
 -14  -4   8    0.39    0.19
  14   4  -8    0.15    0.27
 -13  -4   8    5.94    0.43
  13  -4  -8    6.00    0.55
  13   4  -8    5.56    0.60
  12  -4  -8    7.27    0.58
  12   4  -8    5.65    0.60
 -12  -4   8    6.11    0.40
  11  -4  -8    1.12    0.26
 -11  -4   8    1.37    0.20
  11   4  -8    1.40    0.32
 -10  -4   8    5.95    0.34
  10   4  -8    5.67    0.59
  10  -4  -8    5.49    0.48
   9   4  -8   11.46    0.80
   9  -4  -8   11.21    0.63
  -9  -4   8   11.09    0.41
   8   4  -8    5.37    0.55
   8  -4  -8    5.35    0.45
   7  -4  -8    5.17    0.60
   7  -4  -8    5.34    0.41
   7   4  -8    4.84    0.54
   6   4  -8   24.19    1.10
   6  -4  -8   23.65    0.80
   6  -4  -8   24.29    1.25
   5  -4  -8   37.97    1.52
   5   4  -8   37.35    1.33
   5  -4  -8   36.68    0.95
   4  -4  -8    4.29    0.34
   4  -4  -8    3.60    0.53
   4   4  -8    3.77    0.46
   3  -4  -8   -0.06    0.27
   3  -4  -8    0.12    0.28
   3  -4  -8    0.31    0.13
   3   4  -8    0.43    0.22
   2  -4  -8    3.83    0.53
   2  -4  -8    4.08    0.52
   2  -4  -8    3.94    0.28
   2   4  -8    3.78    0.46
   1  -4  -8    8.71    0.38
   1   4  -8    8.80    0.65
   1  -4  -8    8.52    0.77
   1  -4  -8    8.64    0.75
   0  -4  -8   27.38    0.60
   0   4  -8   30.17    1.15
   0  -4  -8   27.43    1.32
   0  -4  -8   30.08    1.36
  -1   4  -8    7.70    0.60
  -1  -4  -8    8.40    0.74
  -1  -4  -8    7.67    0.72
  -2  -4  -8    0.11    0.25
  -2   4  -8   -0.02    0.22
  -2  -4  -8    0.28    0.28
  -3  -4  -8    1.03    0.36
  -3   4  -8    0.38    0.22
  -3  -4  -8    0.70    0.28
  -4   4  -8    6.65    0.57
  -4  -4  -8    6.37    0.68
  -4  -4  -8    6.77    0.70
  -5  -4  -8    1.81    0.44
  -5   4  -8    2.32    0.37
  -5  -4  -8    2.55    0.44
  -6  -4  -8    1.02    0.41
  -6  -4  -8    0.64    0.29
  -7  -4  -8    0.49    0.32
  -7  -4  -8    0.50    0.28
  -8  -4  -8    0.43    0.34
  -8  -4  -8    0.55    0.32
  -9  -4  -8    1.26    0.43
  -9  -4  -8    0.78    0.35
 -10  -4  -8    0.95    0.41
 -10  -4  -8    0.31    0.35
 -11  -4  -8    0.99    0.45
 -11  -4  -8    0.35    0.31
 -12  -4  -8    0.82    0.36
 -12  -4  -8    1.05    0.41
 -13  -4  -8    0.12    0.39
 -13  -4  -8    0.96    0.43
 -14  -4  -8    0.61    0.39
  17  -5  -8    0.60    0.32
  17   5  -8    0.20    0.35
  16  -5  -8    0.77    0.33
  16   5  -8    0.90    0.43
  15  -5  -8    1.22    0.34
  15   5  -8    1.19    0.41
  14  -5  -8    1.77    0.40
  14   5  -8    2.11    0.46
  13  -5  -8    0.81    0.28
  13   5  -8    1.38    0.41
  12  -5  -8    0.21    0.23
  12   5  -8   -0.05    0.30
  11  -5  -8    0.86    0.27
  11   5  -8    0.69    0.29
  10  -5  -8    0.56    0.25
  10   5  -8    0.38    0.31
   9  -5  -8    0.25    0.19
   9   5  -8   -0.52    0.35
   8  -5  -8    0.34    0.19
   8  -5  -8   -0.02    0.30
   8   5  -8    0.65    0.34
   7  -5  -8   -0.14    0.33
   7   5  -8    0.22    0.29
   7  -5  -8    0.27    0.18
   6  -5  -8   -0.01    0.23
   6   5  -8    0.06    0.26
   6  -5  -8    0.25    0.16
   5  -5  -8    0.24    0.31
   5   5  -8    0.27    0.30
   5  -5  -8    0.31    0.19
   4  -5  -8    0.44    0.30
   4  -5  -8    0.04    0.26
   4   5  -8    0.15    0.25
   4  -5  -8    0.51    0.17
   3  -5  -8    2.49    0.49
   3  -5  -8    2.09    0.46
   3  -5  -8    1.93    0.23
   3   5  -8    1.74    0.40
   2  -5  -8    0.45    0.29
   2  -5  -8    0.30    0.28
   2   5  -8    0.37    0.26
   1  -5  -8    0.02    0.32
   1  -5  -8    0.54    0.34
   1   5  -8    0.44    0.25
   0  -5  -8    0.13    0.30
   0  -5  -8    0.66    0.33
   0   5  -8    0.58    0.27
  -1   5  -8    7.21    0.68
  -1  -5  -8    6.63    0.74
  -1  -5  -8    7.07    0.74
  -2   5  -8    6.01    0.63
  -2  -5  -8    5.70    0.69
  -2  -5  -8    6.78    0.74
  -3  -5  -8    4.66    0.60
  -3   5  -8    5.38    0.57
  -3  -5  -8    4.03    0.61
  -4  -5  -8    6.48    0.72
  -4   5  -8    6.76    0.65
  -4  -5  -8    8.27    0.78
  -5  -5  -8    6.12    0.74
  -5   5  -8    8.14    0.72
  -5  -5  -8    8.25    0.80
  -6  -5  -8    0.37    0.30
  -6  -5  -8    0.41    0.29
  -7  -5  -8    5.45    0.71
  -7  -5  -8    6.34    0.72
  -8  -5  -8    4.24    0.63
  -8  -5  -8    3.79    0.57
  -9  -5  -8    2.60    0.57
  -9  -5  -8    0.94    0.35
 -10  -5  -8    0.76    0.40
 -10  -5  -8   -0.11    0.33
 -11  -5  -8    1.06    0.40
 -12  -5  -8    2.04    0.56
  15  -6  -8    0.26    0.28
  14  -6  -8    0.43    0.27
  13  -6  -8    0.45    0.27
  13   6  -8   -0.03    0.35
  12  -6  -8    1.43    0.37
  12   6  -8    0.80    0.42
  11  -6  -8    0.19    0.26
  11   6  -8    0.06    0.30
  10  -6  -8    0.65    0.28
  10  -6  -8    0.18    0.31
  10   6  -8    1.10    0.45
   9  -6  -8    2.66    0.39
   9  -6  -8    2.68    0.55
   9   6  -8    2.55    0.52
   8  -6  -8    1.45    0.32
   8  -6  -8    2.20    0.54
   8   6  -8    1.14    0.43
   7  -6  -8    0.83    0.43
   7   6  -8    1.90    0.52
   6  -6  -8    1.67    0.51
   6  -6  -8    0.85    0.36
   6   6  -8    1.92    0.50
   5  -6  -8   -0.08    0.30
   5  -6  -8    0.19    0.28
   5   6  -8    0.00    0.35
   4  -6  -8    0.60    0.37
   4  -6  -8    0.56    0.32
   4   6  -8    0.49    0.31
   3  -6  -8    0.19    0.35
   3   6  -8    0.01    0.33
   3  -6  -8    0.81    0.37
   2  -6  -8    0.66    0.32
   2  -6  -8    0.96    0.41
   1  -6  -8    0.66    0.36
   1  -6  -8    0.92    0.39
   1   6  -8    0.87    0.35
   0  -6  -8   -0.10    0.29
   0   6  -8   -0.38    0.34
   0  -6  -8   -0.16    0.33
  -1  -6  -8    0.54    0.38
  -1   6  -8    0.09    0.31
  -1  -6  -8    0.16    0.33
  -2  -6  -8    0.88    0.37
  -2   6  -8    0.77    0.36
  -2  -6  -8    1.37    0.47
  -3   6  -8    0.61    0.31
  -3  -6  -8    0.52    0.33
  -4  -6  -8   -0.34    0.39
  -4   6  -8    0.67    0.39
  -4  -6  -8    0.89    0.41
  -5  -6  -8    0.00    0.36
  -5  -6  -8    0.03    0.31
  -6  -6  -8   -0.10    0.34
  -6  -6  -8   -0.46    0.34
  -7  -6  -8    0.13    0.31
  -7  -6  -8    0.21    0.28
  -8  -6  -8    0.54    0.40
  -9  -6  -8    0.02    0.30
  11  -7  -8    0.82    0.43
  10  -7  -8    0.62    0.39
   9  -7  -8    0.15    0.34
   9  -7  -8   -0.48    0.42
   8  -7  -8   -0.58    0.40
   8  -7  -8   -0.02    0.33
   7  -7  -8    0.10    0.34
   7  -7  -8    0.03    0.30
   6  -7  -8   -0.27    0.34
   6  -7  -8   -0.40    0.38
   5  -7  -8    0.33    0.40
   5  -7  -8   -0.06    0.32
   4  -7  -8    0.10    0.32
   4  -7  -8    0.32    0.34
   3  -7  -8   -0.34    0.37
   3  -7  -8   -0.10    0.30
   2  -7  -8    0.97    0.44
   2  -7  -8    0.57    0.40
   1  -7  -8    0.59    0.38
   0  -7  -8   -0.04    0.33
  -1  -7  -8   -0.28    0.36
  -2  -7  -8    1.17    0.46
  -3  -7  -8   -0.71    0.43
  24   0  -9    0.54    0.34
 -23   0   9   -0.02    0.26
  23   0  -9   -0.38    0.26
  22   0  -9   -0.06    0.24
 -22   0   9    0.08    0.26
 -21   0   9   -0.05    0.25
  21   0  -9   -0.06    0.26
 -20   0   9    0.38    0.31
  20   0  -9    0.51    0.29
 -19   0   9    0.26    0.24
  19   0  -9    0.00    0.21
 -18   0   9    0.16    0.25
  18   0  -9    0.16    0.19
 -17   0   9   -0.02    0.23
  17   0  -9    0.14    0.24
 -16   0   9    0.04    0.22
  16   0  -9    0.05    0.17
 -15   0   9    0.15    0.19
  15   0  -9    0.01    0.17
  14   0  -9    0.04    0.15
 -14   0   9   -0.05    0.21
 -13   0   9   -0.18    0.19
  13   0  -9    0.06    0.16
  12   0  -9    0.01    0.14
  11   0  -9   -0.01    0.17
  10   0  -9    0.02    0.13
   9   0  -9   -0.02    0.15
   8   0  -9    0.03    0.14
   7   0  -9   -0.21    0.14
   6   0  -9   -0.02    0.11
   6   0  -9   -0.09    0.14
   5   0  -9   -0.18    0.15
   4   0  -9    0.05    0.14
   3   0  -9   -0.04    0.15
   2   0  -9   -0.03    0.15
   2   0  -9    0.14    0.09
   1   0  -9    0.01    0.16
   1   0  -9    0.04    0.07
   1   0  -9    0.18    0.18
   0   0  -9    0.17    0.13
   0   0  -9    0.13    0.08
   0   0  -9    0.13    0.16
  -1   0  -9   -0.04    0.15
  -1   0  -9   -0.05    0.06
  -1   0  -9    0.03    0.14
  -2   0  -9    0.01    0.04
  -2   0  -9   -0.16    0.17
  -3   0  -9    0.10    0.16
  -3   0  -9   -0.09    0.17
  -4   0  -9   -0.14    0.20
  -4   0  -9   -0.13    0.18
  -5   0  -9   -0.19    0.20
  -5   0  -9    0.06    0.19
  -6   0  -9    0.03    0.18
  -6   0  -9    0.32    0.25
  -7   0  -9   -0.04    0.19
  -7   0  -9    0.21    0.26
  -8   0  -9   -0.13    0.20
  -8   0  -9    0.27    0.29
  -9   0  -9    0.24    0.23
  -9   0  -9    0.04    0.23
 -10   0  -9   -0.04    0.24
 -10   0  -9    0.42    0.31
 -11   0  -9   -0.24    0.28
 -11   0  -9    0.27    0.29
 -12   0  -9    0.03    0.24
 -13   0  -9    0.29    0.29
 -14   0  -9    0.45    0.35
  14   0   9   -0.63    0.29
 -15   0  -9   -0.11    0.28
 -16   0  -9    0.41    0.32
 -17   0  -9    0.62    0.39
  25   1  -9    0.06    0.27
  24   1  -9    0.16    0.27
 -24  -1   9    0.23    0.33
  23   1  -9    0.20    0.25
 -23  -1   9    0.55    0.34
  23  -1  -9   -0.44    0.31
 -23   1   9    0.04    0.27
  22   1  -9    0.32    0.26
 -22   1   9    0.16    0.30
 -22  -1   9    0.59    0.33
  22  -1  -9    0.01    0.22
  21   1  -9    1.08    0.32
 -21   1   9    0.64    0.33
 -21  -1   9    1.04    0.35
  21  -1  -9    0.72    0.32
  20   1  -9    0.47    0.26
 -20   1   9    0.34    0.24
 -20  -1   9    0.37    0.30
  20  -1  -9    0.27    0.25
 -19  -1   9    6.53    0.61
 -19   1   9    6.49    0.65
  19  -1  -9    6.63    0.63
  19   1  -9    6.65    0.60
  18   1  -9    0.17    0.24
 -18  -1   9    0.73    0.30
 -18   1   9    0.61    0.30
  18  -1  -9    0.91    0.31
  17   1  -9    0.86    0.27
 -17   1   9    0.59    0.29
 -17  -1   9    0.62    0.27
  17  -1  -9    0.75    0.30
  16   1  -9   -0.18    0.22
 -16   1   9   -0.17    0.27
 -16  -1   9    0.29    0.22
  16  -1  -9    0.07    0.19
  15   1  -9    0.07    0.17
 -15  -1   9    0.21    0.19
  15  -1  -9   -0.12    0.21
  14   1  -9    0.02    0.17
 -14  -1   9   -0.24    0.18
  14  -1  -9    0.22    0.19
  13   1  -9    0.82    0.22
 -13  -1   9    1.21    0.25
  13  -1  -9    1.20    0.27
  12   1  -9    0.20    0.21
  12  -1  -9   -0.05    0.18
 -12  -1   9    0.03    0.15
  11   1  -9   -0.18    0.16
 -11  -1   9   -0.28    0.18
  11  -1  -9    0.10    0.14
  10   1  -9   12.90    0.66
  10  -1  -9   13.95    0.66
   9  -1  -9    0.03    0.14
   9   1  -9    0.25    0.13
   8   1  -9   13.53    0.57
   8  -1  -9   13.62    0.62
   7  -1  -9    0.31    0.14
   7   1  -9    0.15    0.10
   7   1  -9    0.51    0.18
   6  -1  -9    0.22    0.11
   6   1  -9    0.33    0.13
   6   1  -9    0.65    0.15
   6  -1  -9    0.49    0.19
   6   1  -9    0.68    0.17
   5  -1  -9    1.76    0.23
   5   1  -9    1.62    0.25
   5  -1  -9    1.60    0.29
   5   1  -9    1.65    0.20
   5   1  -9    1.77    0.24
   4  -1  -9    3.72    0.43
   4  -1  -9    3.72    0.30
   4   1  -9    3.26    0.28
  -4   1   9    3.06    0.29
   4   1  -9    3.97    0.35
   3  -1  -9    0.21    0.23
  -3   1   9    0.30    0.13
   3   1  -9    0.03    0.11
   3   1  -9    0.09    0.11
   2  -1  -9    4.03    0.46
   2   1  -9    4.02    0.30
  -2   1   9    4.39    0.33
   2   1  -9    4.82    0.40
  -2  -1   9    4.19    0.37
   2   1  -9    4.54    0.36
  -1   1   9   12.19    0.54
   1   1  -9   12.81    0.51
   1   1  -9   12.67    0.64
   1  -1  -9   12.03    0.76
  -1  -1   9   12.25    0.64
   1   1  -9   12.47    0.57
   1  -1  -9   11.85    0.70
   0  -1   9   -0.06    0.13
   0   1   9    0.23    0.12
   0   1  -9    0.08    0.13
   0  -1  -9   -0.11    0.18
   0   1  -9    0.03    0.09
   0   1  -9    0.00    0.13
   0  -1  -9   -0.05    0.17
   1   1   9   10.58    0.48
  -1   1  -9   10.48    0.44
  -1   1  -9   11.04    0.63
  -1  -1  -9   11.65    0.75
  -1   1  -9   10.50    0.53
  -1  -1  -9   11.25    0.70
   2   1   9    0.56    0.12
  -2   1  -9    0.63    0.16
  -2  -1  -9    0.76    0.23
  -2   1  -9    0.77    0.13
   2  -1   9    0.80    0.12
  -2   1  -9    0.64    0.20
  -2  -1  -9    0.84    0.26
  -3   1  -9    9.55    0.40
  -3   1  -9    9.60    0.61
  -3  -1  -9    9.90    0.70
   3  -1   9    8.99    0.35
  -3   1  -9    9.05    0.52
  -3  -1  -9    9.42    0.65
  -4   1  -9    1.13    0.24
  -4  -1  -9    0.84    0.26
  -4   1  -9    0.98    0.24
   4  -1   9    0.81    0.12
  -4  -1  -9    0.24    0.22
  -5   1  -9    1.55    0.26
  -5  -1  -9    1.19    0.30
  -5   1  -9    1.30    0.31
   5  -1   9    1.15    0.14
  -5  -1  -9    1.52    0.33
  -6   1  -9    3.56    0.38
  -6  -1  -9    4.35    0.51
  -6   1  -9    4.52    0.50
   6  -1   9    3.99    0.25
  -6  -1  -9    4.04    0.51
  -7   1  -9    0.72    0.22
  -7  -1  -9    1.03    0.28
  -7   1  -9    0.98    0.30
   7  -1   9    0.65    0.11
  -7  -1  -9    1.42    0.36
  -8   1  -9   -0.01    0.20
  -8  -1  -9    0.29    0.22
  -8  -1  -9    0.49    0.24
  -9   1  -9    0.20    0.21
  -9  -1  -9    0.80    0.31
  -9  -1  -9    0.56    0.29
 -10   1  -9    0.50    0.25
 -10  -1  -9    0.12    0.24
 -10  -1  -9    0.92    0.31
 -11   1  -9    0.22    0.24
 -11  -1  -9    0.26    0.28
 -11  -1  -9    0.37    0.29
 -12  -1  -9    2.44    0.51
 -12   1  -9    2.01    0.40
 -13  -1  -9    0.48    0.33
 -13  -1  -9    0.34    0.31
 -13   1  -9    0.54    0.29
 -14  -1  -9    0.30    0.33
 -14   1  -9    0.18    0.29
 -15  -1  -9    0.63    0.36
 -15   1  -9    0.51    0.30
  15  -1   9    0.10    0.26
 -16  -1  -9    0.38    0.37
  16  -1   9    0.39    0.29
 -16   1  -9    0.20    0.31
  17  -1   9   -0.01    0.29
 -17   1  -9    0.11    0.33
  25   2  -9   -0.19    0.27
  24   2  -9    0.49    0.34
 -24  -2   9    0.58    0.38
  23   2  -9   -0.03    0.25
 -23  -2   9    0.16    0.27
  22   2  -9    0.09    0.22
 -22   2   9   -0.25    0.27
 -22  -2   9    0.09    0.24
  22  -2  -9    0.14    0.29
  21   2  -9   -0.04    0.23
 -21  -2   9    0.20    0.27
 -21   2   9   -0.17    0.32
  21  -2  -9    0.83    0.34
  20   2  -9    0.09    0.23
 -20  -2   9    0.50    0.28
  20  -2  -9    0.74    0.32
  19   2  -9    2.11    0.37
 -19  -2   9    2.02    0.37
  19  -2  -9    2.08    0.40
  18   2  -9   -0.17    0.24
 -18  -2   9    0.41    0.27
  18  -2  -9    0.42    0.28
  17   2  -9    1.82    0.34
  17  -2  -9    2.58    0.40
 -17  -2   9    2.18    0.37
  16   2  -9    4.06    0.45
 -16  -2   9    3.92    0.45
  16  -2  -9    4.07    0.49
 -15  -2   9    0.01    0.17
  15  -2  -9    0.24    0.23
  15   2  -9    0.01    0.20
 -14  -2   9    0.12    0.18
  14  -2  -9    0.29    0.21
  14   2  -9   -0.21    0.19
 -13  -2   9    4.35    0.39
  13  -2  -9    4.04    0.41
 -12  -2   9   10.24    0.54
  12   2  -9   11.08    0.64
  12  -2  -9   10.03    0.63
 -11  -2   9    6.96    0.44
  11   2  -9    7.20    0.53
  11  -2  -9    6.49    0.48
  10  -2  -9    1.63    0.28
  10   2  -9    1.73    0.29
   9  -2  -9    2.03    0.28
   9   2  -9    2.27    0.32
   9   2  -9    2.07    0.26
   8   2  -9    5.62    0.34
   8   2  -9    5.48    0.45
   8  -2  -9    5.54    0.41
   8   2  -9    5.47    0.35
   7   2  -9   10.68    0.43
   7  -2  -9   11.60    0.55
   7   2  -9   10.85    0.60
   7   2  -9   10.29    0.48
   6   2  -9    1.22    0.18
   6  -2  -9    1.30    0.29
   6  -2  -9    1.50    0.23
   6   2  -9    1.54    0.17
   6   2  -9    1.64    0.25
   5   2  -9    3.57    0.23
   5  -2  -9    3.57    0.45
   5  -2  -9    3.54    0.30
   5   2  -9    3.37    0.28
   5   2  -9    3.61    0.36
   4  -2  -9    0.35    0.14
  -4   2   9    0.60    0.15
   4  -2  -9    1.15    0.32
   4   2  -9    0.61    0.11
   4   2  -9    0.59    0.17
   4   2  -9    0.70    0.15
   3  -2  -9    1.50    0.19
  -3   2   9    1.31    0.19
   3  -2  -9    1.36    0.31
   3   2  -9    1.67    0.15
   3   2  -9    1.89    0.27
   3   2  -9    1.26    0.18
   2  -2  -9    4.17    0.48
   2   2  -9    4.21    0.32
   2   2  -9    3.76    0.34
  -2  -2   9    4.09    0.34
  -2   2   9    4.05    0.31
   2   2  -9    3.95    0.26
   1  -2  -9    1.35    0.31
  -1  -2   9    1.34    0.21
   1   2  -9    1.44    0.16
   1  -2  -9    0.91    0.25
   1  -2  -9    1.20    0.14
   1   2  -9    1.22    0.22
   1   2  -9    1.61    0.22
  -1   2   9    1.46    0.20
   0  -2  -9    2.99    0.44
   0  -2   9    2.28    0.28
   0  -2  -9    2.22    0.36
   0   2  -9    2.60    0.28
   0  -2  -9    2.20    0.16
   0   2   9    2.19    0.22
   0   2  -9    2.11    0.26
   0   2  -9    2.18    0.21
  -1  -2  -9    4.11    0.48
  -1   2  -9    4.76    0.38
  -1   2  -9    4.05    0.34
  -1  -2  -9    3.79    0.17
   1   2   9    4.28    0.29
   1  -2   9    4.15    0.39
  -1   2  -9    3.92    0.28
  -1  -2  -9    4.07    0.50
  -2   2  -9   10.01    0.58
  -2   2  -9   10.44    0.52
  -2  -2  -9   10.62    0.77
   2   2   9   10.75    0.44
  -2   2  -9   11.03    0.46
  -2  -2  -9   10.95    0.76
  -3   2  -9    7.59    0.53
  -3   2  -9    7.54    0.45
   3   2   9    7.40    0.36
  -3  -2  -9    7.75    0.68
  -3   2  -9    7.08    0.39
  -3  -2  -9    8.51    0.68
  -4   2  -9    2.58    0.26
  -4  -2  -9    2.97    0.43
   4   2   9    2.52    0.22
  -4   2  -9    2.40    0.28
  -4   2  -9    2.74    0.35
  -4  -2  -9    3.39    0.48
  -5   2  -9    1.82    0.24
   5   2   9    1.68    0.18
  -5  -2  -9    1.53    0.37
   5  -2   9    1.42    0.23
  -5  -2  -9    1.11    0.31
  -6  -2  -9    4.31    0.56
  -6   2  -9    4.61    0.38
  -6  -2  -9    4.02    0.52
  -7   2  -9    0.08    0.14
  -7  -2  -9    0.26    0.25
  -7  -2  -9    0.12    0.26
  -8  -2  -9    2.04    0.43
  -8  -2  -9    1.20    0.34
  -8   2  -9    1.61    0.29
  -9  -2  -9    0.24    0.26
  -9  -2  -9    0.32    0.28
  -9   2  -9    0.76    0.23
 -10  -2  -9    5.03    0.64
 -10  -2  -9    4.55    0.61
 -10   2  -9    4.31    0.45
 -11  -2  -9    0.24    0.29
 -11  -2  -9    1.32    0.41
 -11   2  -9    1.34    0.32
 -12  -2  -9   -0.15    0.31
 -12  -2  -9    0.19    0.25
 -12   2  -9    0.13    0.23
 -13  -2  -9    0.19    0.32
 -13  -2  -9    0.24    0.35
 -13   2  -9   -0.01    0.20
 -14  -2  -9   -0.53    0.37
 -14  -2  -9    0.00    0.33
 -15  -2  -9    0.35    0.38
 -16   2  -9    0.21    0.26
  16  -2   9   -0.48    0.38
 -17   2  -9    0.05    0.32
  17  -2   9   -0.39    0.35
 -23  -3   9    0.68    0.34
 -22  -3   9   -0.08    0.26
  22   3  -9    0.91    0.44
  21   3  -9    1.53    0.45
  21  -3  -9    0.70    0.39
 -20  -3   9    0.32    0.25
  20   3  -9    0.78    0.40
  20  -3  -9    1.02    0.35
 -19  -3   9    0.14    0.21
  19   3  -9    0.75    0.36
  19  -3  -9    0.20    0.28
 -18  -3   9    0.22    0.23
  18   3  -9    0.46    0.34
  18  -3  -9    0.42    0.30
 -17  -3   9    0.28    0.20
  17   3  -9    0.57    0.35
  17  -3  -9    0.25    0.26
 -16  -3   9    0.23    0.19
  16   3  -9    0.89    0.33
  16  -3  -9    0.23    0.26
 -15  -3   9    3.37    0.39
  15   3  -9    3.06    0.46
  15  -3  -9    3.65    0.46
 -14  -3   9    0.03    0.15
  14   3  -9   -0.18    0.24
  14  -3  -9   -0.16    0.19
 -13  -3   9    4.14    0.36
  13   3  -9    3.96    0.48
  13  -3  -9    3.83    0.45
 -12  -3   9    2.16    0.26
  12   3  -9    2.16    0.38
  12  -3  -9    2.03    0.32
 -11  -3   9    7.13    0.42
  11   3  -9    6.37    0.57
  11  -3  -9    6.68    0.51
  10   3  -9    0.67    0.18
  10   3  -9    0.89    0.11
  10   3  -9    0.49    0.22
  10  -3  -9    0.97    0.23
  10   3  -9    0.76    0.12
   9   3  -9    2.70    0.28
   9   3  -9    2.57    0.15
   9   3  -9    2.42    0.17
   9  -3  -9    3.24    0.36
   9   3  -9    2.45    0.39
   8   3  -9   -0.08    0.11
   8  -3  -9    0.03    0.14
   8   3  -9   -0.14    0.22
   8   3  -9    0.14    0.05
   7   3  -9    0.19    0.10
   7  -3  -9    0.38    0.26
   7  -3  -9    0.08    0.12
   7   3  -9    0.02    0.21
   6   3  -9    7.39    0.57
   6  -3  -9    6.32    0.42
   6  -3  -9    6.69    0.65
   6   3  -9    6.82    0.31
   5   3  -9    0.16    0.06
   5  -3  -9    0.02    0.22
   5  -3  -9    0.17    0.13
   5   3  -9    0.15    0.18
   4   3  -9    0.58    0.06
   4  -3  -9    0.83    0.31
   4  -3  -9    0.99    0.18
   4   3  -9    0.73    0.08
   4   3  -9    1.13    0.27
   3  -3  -9   21.44    0.72
   3  -3  -9   22.81    0.69
   3   3  -9   23.03    0.94
   3  -3  -9   22.09    1.14
  -3   3   9   21.14    0.72
   2  -3  -9   24.84    0.70
   2  -3  -9   23.96    0.73
   2   3  -9   26.69    1.00
   2  -3  -9   24.33    1.19
  -2  -3   9   25.38    0.70
  -2   3   9   25.54    0.75
   2  -3  -9   24.86    1.19
   1  -3  -9    5.80    0.60
   1  -3  -9    6.68    0.37
   1   3  -9    7.09    0.52
  -1  -3   9    6.55    0.39
  -1   3   9    6.46    0.36
   1  -3  -9    6.38    0.62
   0  -3  -9    3.15    0.48
   0  -3  -9    2.97    0.44
   0   3  -9    3.28    0.14
   0  -3  -9    3.34    0.26
   0  -3   9    3.39    0.31
   0   3  -9    3.59    0.39
   0   3   9    3.43    0.26
  -1  -3  -9    3.60    0.49
  -1  -3  -9    3.17    0.24
   1  -3   9    3.21    0.32
  -1   3  -9    2.90    0.35
   1   3   9    3.43    0.24
  -1  -3  -9    3.32    0.50
  -2  -3  -9    4.86    0.57
  -2   3  -9    4.11    0.40
  -2  -3  -9    3.91    0.23
   2   3   9    4.54    0.24
  -2  -3  -9    4.30    0.53
  -3  -3  -9    1.45    0.38
  -3   3  -9    1.25    0.25
  -3  -3  -9    1.21    0.36
  -4   3  -9   11.40    0.64
  -4  -3  -9   11.59    0.87
  -4  -3  -9   11.25    0.85
  -5   3  -9   11.56    0.64
  -5  -3  -9   12.34    0.89
  -5  -3  -9   11.12    0.86
  -6  -3  -9    1.22    0.35
  -6  -3  -9    1.68    0.42
  -7  -3  -9    1.75    0.40
  -7  -3  -9    1.41    0.35
  -8  -3  -9    3.13    0.52
  -8   3  -9    3.16    0.35
  -8  -3  -9    3.98    0.56
  -9  -3  -9    3.77    0.57
  -9   3  -9    4.43    0.43
  -9  -3  -9    4.54    0.62
 -10  -3  -9    2.93    0.53
 -10   3  -9    2.98    0.38
 -10  -3  -9    3.21    0.54
 -11  -3  -9    2.31    0.53
 -11   3  -9    2.35    0.36
 -11  -3  -9    3.15    0.55
 -12   3  -9    0.52    0.25
 -12  -3  -9    1.81    0.50
 -13  -3  -9    1.64    0.46
 -13   3  -9    2.14    0.40
 -13  -3  -9    2.05    0.50
 -14  -3  -9    0.01    0.28
  20   4  -9   -0.44    0.42
  19   4  -9    2.60    0.54
  19  -4  -9    2.97    0.51
  18   4  -9    0.01    0.36
  18  -4  -9    0.26    0.25
  17   4  -9   -0.35    0.37
  17  -4  -9    0.45    0.27
  16   4  -9   -0.18    0.26
  16  -4  -9    0.29    0.25
  15   4  -9    0.90    0.30
  15  -4  -9    1.11    0.33
  14   4  -9    1.33    0.35
  14  -4  -9    1.87    0.35
  13   4  -9   -0.24    0.35
  13  -4  -9    0.36    0.24
  12  -4  -9    3.91    0.45
  12   4  -9    4.18    0.54
  11  -4  -9    6.55    0.53
  11   4  -9    4.39    0.54
  10   4  -9    3.30    0.47
  10  -4  -9    2.59    0.36
   9   4  -9    9.89    0.75
   9  -4  -9    9.70    0.60
   8  -4  -9    4.84    0.62
   8  -4  -9    4.23    0.40
   8   4  -9    4.59    0.53
   7  -4  -9    3.35    0.53
   7   4  -9    3.77    0.49
   7  -4  -9    2.78    0.33
   6  -4  -9    2.36    0.44
   6  -4  -9    3.56    0.34
   6   4  -9    3.33    0.47
   5   4  -9   12.48    0.82
   5  -4  -9   11.84    0.57
   5  -4  -9   12.12    0.92
   4  -4  -9    2.70    0.46
   4  -4  -9    3.31    0.31
   4   4  -9    3.02    0.44
   3  -4  -9    0.46    0.30
   3  -4  -9    0.58    0.15
   3  -4  -9    0.58    0.29
   3   4  -9    0.64    0.29
   2  -4  -9    3.21    0.51
   2  -4  -9    2.31    0.44
   2  -4  -9    2.92    0.27
   2   4  -9    3.27    0.43
   1  -4  -9    0.91    0.32
   1  -4  -9    1.54    0.39
   1   4  -9    1.10    0.26
   1  -4  -9    1.27    0.17
   0  -4  -9    4.80    0.58
   0  -4  -9    4.85    0.61
   0   4  -9    5.04    0.51
  -1  -4  -9    3.56    0.55
  -1   4  -9    3.19    0.41
  -1  -4  -9    4.41    0.59
  -2  -4  -9    1.78    0.41
  -2   4  -9    2.04    0.36
  -2  -4  -9    2.71    0.48
  -3  -4  -9    2.75    0.50
  -3   4  -9    2.32    0.38
  -3  -4  -9    2.45    0.49
  -4  -4  -9    0.65    0.31
  -4   4  -9    1.07    0.30
  -4  -4  -9    1.09    0.36
  -5  -4  -9    6.34    0.70
  -5   4  -9    5.87    0.55
  -5  -4  -9    5.00    0.63
  -6  -4  -9   -0.56    0.38
  -6  -4  -9   -0.09    0.29
  -7  -4  -9   -0.38    0.36
  -7  -4  -9   -0.07    0.28
  -8  -4  -9    1.13    0.42
  -8  -4  -9    0.65    0.33
  -9  -4  -9   -0.39    0.37
  -9  -4  -9    0.41    0.31
 -10  -4  -9    0.04    0.38
 -10  -4  -9    0.21    0.35
 -11  -4  -9    1.00    0.43
 -11  -4  -9    1.28    0.44
 -12  -4  -9    0.17    0.37
 -12  -4  -9    0.96    0.43
 -13  -4  -9    0.09    0.34
  17   5  -9    0.60    0.36
  17  -5  -9    0.37    0.31
  16   5  -9   -0.50    0.38
  16  -5  -9    0.33    0.31
  15   5  -9    0.11    0.31
  15  -5  -9    0.26    0.24
  14   5  -9    0.16    0.28
  14  -5  -9    0.24    0.24
  13   5  -9    0.52    0.34
  13  -5  -9    0.55    0.27
  12   5  -9   -0.01    0.30
  12  -5  -9   -0.04    0.22
  11   5  -9    0.48    0.32
  11  -5  -9    0.18    0.22
  10   5  -9    0.23    0.32
  10  -5  -9    0.11    0.21
   9  -5  -9    1.71    0.45
   9   5  -9    1.89    0.46
   9  -5  -9    1.69    0.32
   8  -5  -9   -0.09    0.31
   8   5  -9   -0.02    0.29
   8  -5  -9    0.03    0.17
   7  -5  -9    0.76    0.33
   7  -5  -9    1.47    0.26
   6  -5  -9    0.36    0.29
   6   5  -9    0.41    0.28
   6  -5  -9    0.64    0.21
   5  -5  -9    0.46    0.29
   5  -5  -9    0.22    0.15
   5   5  -9    0.57    0.32
   4  -5  -9    1.03    0.38
   4  -5  -9    1.21    0.39
   4  -5  -9    1.44    0.23
   4   5  -9    1.67    0.38
   3  -5  -9    0.20    0.30
   3  -5  -9   -0.12    0.34
   3   5  -9    0.78    0.36
   2  -5  -9    2.84    0.53
   2  -5  -9    3.63    0.58
   2   5  -9    2.87    0.47
   1  -5  -9    5.27    0.67
   1  -5  -9    5.63    0.69
   1   5  -9    5.27    0.60
   0  -5  -9    3.88    0.59
   0  -5  -9    4.39    0.63
   0   5  -9    4.64    0.56
  -1  -5  -9    6.77    0.77
  -1   5  -9    5.86    0.62
  -1  -5  -9    6.83    0.75
  -2  -5  -9    3.53    0.58
  -2   5  -9    3.21    0.48
  -2  -5  -9    3.45    0.56
  -3  -5  -9    1.13    0.41
  -3   5  -9    1.09    0.37
  -3  -5  -9    1.73    0.48
  -4  -5  -9    1.79    0.45
  -4   5  -9    1.82    0.43
  -4  -5  -9    2.28    0.51
  -5  -5  -9    1.77    0.43
  -5  -5  -9    1.67    0.44
  -6  -5  -9    6.99    0.82
  -6  -5  -9    6.74    0.75
  -7  -5  -9    1.50    0.47
  -7  -5  -9    1.11    0.36
  -8  -5  -9    2.02    0.54
  -8  -5  -9    2.08    0.52
  -9  -5  -9    3.07    0.64
  -9  -5  -9    2.58    0.54
 -10  -5  -9    0.98    0.43
 -11  -5  -9    2.68    0.59
  15  -6  -9    0.17    0.31
  14  -6  -9    1.56    0.38
  13  -6  -9    1.28    0.36
  12   6  -9    2.03    0.54
  12  -6  -9    1.20    0.33
  11  -6  -9    1.40    0.46
  11   6  -9    0.96    0.47
  11  -6  -9    1.30    0.33
  10  -6  -9    1.23    0.44
  10   6  -9    0.86    0.40
  10  -6  -9    1.11    0.30
   9   6  -9    0.69    0.35
   9  -6  -9    0.87    0.43
   8  -6  -9    0.40    0.37
   8   6  -9    1.18    0.44
   7  -6  -9    3.96    0.66
   7  -6  -9    2.87    0.53
   6  -6  -9    1.71    0.47
   6  -6  -9    1.93    0.50
   6   6  -9    1.99    0.50
   5  -6  -9    0.08    0.31
   5  -6  -9    0.18    0.29
   5   6  -9   -0.07    0.31
   4  -6  -9    0.88    0.40
   4  -6  -9    1.21    0.43
   4   6  -9    0.20    0.29
   3  -6  -9    1.44    0.46
   3   6  -9    1.01    0.43
   3  -6  -9    0.99    0.43
   2  -6  -9    0.89    0.38
   2  -6  -9    1.81    0.49
   2   6  -9    0.94    0.36
   1  -6  -9    1.13    0.41
   1  -6  -9    2.26    0.55
   1   6  -9    1.65    0.44
   0  -6  -9    4.82    0.72
   0   6  -9    5.04    0.66
   0  -6  -9    5.03    0.72
  -1  -6  -9    3.43    0.64
  -1   6  -9    2.67    0.53
  -1  -6  -9    2.34    0.52
  -2  -6  -9    0.31    0.32
  -2   6  -9    0.14    0.30
  -2  -6  -9    0.25    0.34
  -3  -6  -9    0.03    0.35
  -3   6  -9    0.14    0.26
  -3  -6  -9    0.45    0.37
  -4  -6  -9   -0.41    0.35
  -4   6  -9    0.58    0.39
  -4  -6  -9    1.12    0.48
  -5  -6  -9   -0.02    0.38
  -5  -6  -9   -0.26    0.35
  -6  -6  -9   -0.06    0.35
  -6  -6  -9   -0.01    0.35
  -7  -6  -9    0.27    0.33
  -8  -6  -9    0.13    0.33
  -9  -6  -9    0.66    0.43
   9  -7  -9    0.16    0.34
   9  -7  -9   -0.51    0.43
   8  -7  -9   -0.45    0.42
   8  -7  -9   -0.11    0.34
   7  -7  -9   -0.16    0.32
   7  -7  -9    0.22    0.34
   6  -7  -9    0.40    0.40
   6  -7  -9    0.57    0.42
   5  -7  -9    0.24    0.36
   5  -7  -9   -0.40    0.38
   4  -7  -9   -0.19    0.40
   4  -7  -9   -0.16    0.35
   3  -7  -9    0.08    0.34
   3  -7  -9    1.18    0.49
   2  -7  -9    0.70    0.39
   2  -7  -9    1.49    0.50
   1  -7  -9    2.08    0.57
   1  -7  -9   -0.10    0.37
   0  -7  -9    0.60    0.39
  -1  -7  -9    1.13    0.47
  24   0 -10   -0.25    0.30
 -23   0  10   -0.14    0.26
  23   0 -10    0.02    0.29
  22   0 -10    0.20    0.29
 -22   0  10    0.40    0.31
 -21   0  10    2.45    0.45
  21   0 -10    2.37    0.45
 -20   0  10    0.21    0.24
  20   0 -10    0.45    0.28
 -19   0  10    0.64    0.27
  19   0 -10    0.72    0.27
 -18   0  10   10.65    0.76
  18   0 -10    8.86    0.67
 -17   0  10    5.76    0.55
  17   0 -10    6.43    0.57
 -16   0  10    5.66    0.52
  16   0 -10    5.34    0.53
 -15   0  10    7.08    0.56
  15   0 -10    7.01    0.58
  14   0 -10   19.54    0.88
  13   0 -10   34.33    1.15
  12   0 -10   13.92    0.72
  11   0 -10   31.34    1.05
  10   0 -10   21.91    0.87
   9   0 -10   18.32    0.79
   8   0 -10    4.58    0.40
   8   0 -10    4.51    0.47
   7   0 -10   19.48    0.90
   6   0 -10   51.73    1.46
   5   0 -10   41.28    1.29
   4   0 -10   24.06    1.00
   3   0 -10   16.28    0.50
   3   0 -10   16.27    0.84
   2   0 -10   17.44    0.51
   2   0 -10   18.34    0.88
   2   0 -10   17.25    0.81
   1   0 -10    6.06    0.29
   1   0 -10    7.02    0.56
   1   0 -10    6.74    0.50
   0   0 -10    0.07    0.17
   0   0 -10    0.22    0.08
   0   0 -10    0.10    0.19
  -1   0 -10    1.23    0.12
  -1   0 -10    1.60    0.30
  -1   0 -10    1.26    0.26
  -2   0 -10    0.11    0.16
  -2   0 -10    0.12    0.05
  -2   0 -10    0.00    0.21
  -3   0 -10   13.30    0.81
  -3   0 -10   14.66    0.79
  -4   0 -10   31.22    1.24
  -4   0 -10   28.02    1.12
  -5   0 -10   27.84    1.20
  -5   0 -10   29.48    1.16
  -6   0 -10    8.19    0.69
  -6   0 -10    8.34    0.64
  -7   0 -10   17.03    0.97
  -7   0 -10   16.06    0.91
  -8   0 -10   -0.03    0.22
  -8   0 -10    0.14    0.27
  -9   0 -10    5.97    0.65
  -9   0 -10    5.70    0.59
 -10   0 -10    2.72    0.44
 -10   0 -10    2.82    0.48
 -11   0 -10    7.21    0.74
 -11   0 -10    6.30    0.65
 -12   0 -10    4.65    0.59
 -13   0 -10    2.86    0.51
 -14   0 -10    2.12    0.46
 -15   0 -10    1.18    0.44
 -16   0 -10    3.29    0.60
 -24  -1  10    1.02    0.38
  24   1 -10    1.22    0.39
  23   1 -10    0.42    0.32
 -23  -1  10    0.44    0.29
  23  -1 -10    0.33    0.28
 -23   1  10    0.02    0.27
  22   1 -10    1.59    0.40
 -22   1  10    1.79    0.42
 -22  -1  10    1.86    0.42
  22  -1 -10    2.36    0.46
  21   1 -10    1.54    0.37
 -21   1  10    2.00    0.47
 -21  -1  10    2.23    0.42
  21  -1 -10    2.22    0.45
  20   1 -10    0.91    0.29
 -20   1  10    1.20    0.35
 -20  -1  10    0.72    0.30
  20  -1 -10    1.73    0.40
  19   1 -10    0.70    0.30
 -19   1  10    0.42    0.25
 -19  -1  10    0.73    0.28
  19  -1 -10    0.35    0.26
  18   1 -10    0.91    0.28
 -18  -1  10    0.62    0.26
  18  -1 -10    0.62    0.28
  17   1 -10    2.39    0.38
 -17  -1  10    1.89    0.33
  17  -1 -10    2.39    0.37
  16   1 -10   -0.12    0.23
 -16  -1  10    0.00    0.20
  16  -1 -10   -0.03    0.22
  15   1 -10   -0.19    0.20
 -15  -1  10   -0.15    0.20
  15  -1 -10    0.46    0.25
  14   1 -10    4.53    0.46
 -14  -1  10    4.65    0.43
  14  -1 -10    5.27    0.49
  13   1 -10    1.84    0.31
  13  -1 -10    2.91    0.39
  12   1 -10    2.95    0.37
  12  -1 -10    2.98    0.36
  11  -1 -10    2.99    0.34
  11   1 -10    2.73    0.34
  10  -1 -10    0.70    0.21
   9  -1 -10   13.50    0.66
   8   1 -10   10.97    0.54
   8  -1 -10   11.31    0.60
   8   1 -10   12.03    0.66
   7   1 -10    9.39    0.49
   7  -1 -10    9.95    0.54
   7   1 -10    9.24    0.55
   7  -1 -10    9.78    0.69
   6   1 -10   29.26    0.84
   6  -1 -10   28.65    0.90
   6   1 -10   29.64    0.84
   6   1 -10   28.57    0.98
   6  -1 -10   29.05    1.17
   5   1 -10   29.24    0.84
   5  -1 -10   28.75    0.87
   5   1 -10   28.61    0.82
   5   1 -10   30.00    1.00
   5  -1 -10   29.58    1.18
   4   1 -10  110.52    1.61
   4   1 -10  110.98    1.94
   4  -1 -10  117.12    2.35
   3   1 -10   28.96    0.82
   3   1 -10   31.15    1.03
   3  -1 -10   31.75    1.23
   2   1 -10   22.49    0.70
   2   1 -10   23.08    0.91
   2  -1 -10   23.45    1.06
   2   1 -10   21.86    0.80
   1   1 -10   24.03    0.72
   1   1 -10   24.76    0.94
   1  -1 -10   25.15    1.12
   1   1 -10   23.50    0.84
   1  -1 -10   24.11    1.04
   0   1  10   82.88    1.44
   0   1 -10   81.50    1.27
   0   1 -10   81.21    1.73
   0  -1 -10   81.32    2.01
   0   1 -10   81.23    1.56
   0  -1 -10   78.16    1.87
   1   1  10   51.32    1.12
  -1   1 -10   51.60    0.99
  -1   1 -10   52.11    1.41
  -1  -1 -10   50.49    1.61
  -1   1 -10   51.65    1.26
  -1  -1 -10   51.00    1.53
   2   1  10   16.81    0.65
  -2   1 -10   16.83    0.55
  -2   1 -10   18.57    0.86
  -2  -1 -10   17.81    0.97
  -2   1 -10   16.24    0.73
  -2  -1 -10   17.74    0.92
  -3   1 -10   39.22    0.82
  -3   1 -10   40.98    1.30
  -3  -1 -10   40.48    1.48
  -3   1 -10   40.43    1.18
  -3  -1 -10   38.16    1.36
  -4   1 -10   43.36    1.38
  -4  -1 -10   42.21    1.52
   4  -1  10   43.09    0.74
  -4   1 -10   41.62    1.22
  -4  -1 -10   42.60    1.47
  -5   1 -10   13.80    0.83
  -5  -1 -10   13.22    0.87
   5  -1  10   13.40    0.42
  -5   1 -10   14.81    0.74
  -5  -1 -10   14.78    0.89
  -6   1 -10   29.57    1.22
  -6  -1 -10   29.03    1.29
  -6   1 -10   29.17    1.07
  -6  -1 -10   30.42    1.30
  -7   1 -10   25.77    1.20
  -7  -1 -10   25.90    1.26
  -7   1 -10   25.82    1.05
  -7  -1 -10   26.16    1.23
  -8   1 -10   22.81    1.12
  -8  -1 -10   22.31    1.20
  -8   1 -10   20.85    0.97
  -8  -1 -10   21.89    1.16
  -9   1 -10    0.18    0.19
  -9  -1 -10    0.77    0.35
  -9   1 -10    0.78    0.34
  -9  -1 -10    0.80    0.35
 -10  -1 -10    9.27    0.84
 -10   1 -10    8.57    0.67
 -10  -1 -10    7.81    0.73
 -11   1 -10    5.33    0.57
 -11  -1 -10    4.38    0.60
 -11  -1 -10    4.25    0.62
 -12   1 -10    1.52    0.39
 -12  -1 -10    0.69    0.36
 -12  -1 -10    1.29    0.42
 -13  -1 -10   -0.05    0.31
 -13  -1 -10    0.41    0.40
 -13   1 -10    0.13    0.29
 -14  -1 -10    0.15    0.29
 -14   1 -10    0.34    0.32
 -15  -1 -10    0.96    0.46
  15  -1  10   -0.12    0.29
 -15   1 -10    0.25    0.31
  16  -1  10   -0.49    0.35
 -16   1 -10    0.48    0.37
 -17   1 -10    0.18    0.30
  24   2 -10   -0.04    0.28
 -24  -2  10    0.18    0.34
  23   2 -10    0.70    0.33
 -23  -2  10    1.02    0.38
  22   2 -10   -0.36    0.27
 -22  -2  10    0.46    0.35
  22  -2 -10   -0.17    0.26
  21   2 -10    0.32    0.25
 -21  -2  10    0.21    0.26
  21  -2 -10    0.16    0.23
  20   2 -10    0.66    0.30
 -20  -2  10    0.41    0.27
  20  -2 -10    0.38    0.26
  19   2 -10   -0.44    0.29
 -19  -2  10    0.32    0.26
  19  -2 -10    0.55    0.31
  18   2 -10    0.93    0.28
 -18  -2  10    1.15    0.31
  18  -2 -10    1.48    0.37
 -17  -2  10   14.87    0.82
  17   2 -10   13.25    0.81
  17  -2 -10   15.07    0.88
 -16  -2  10    2.11    0.33
  16  -2 -10    2.39    0.39
  16   2 -10    1.99    0.35
  15  -2 -10   -0.01    0.20
 -15  -2  10    0.22    0.18
 -14  -2  10   14.69    0.73
  14  -2 -10   15.86    0.83
  13   2 -10   27.15    1.05
  13  -2 -10   25.63    1.00
 -13  -2  10   25.12    0.89
  12   2 -10   21.35    0.91
  12  -2 -10   21.94    0.92
  11   2 -10   18.94    0.84
  11  -2 -10   17.35    0.79
  10  -2 -10   24.18    0.88
  10   2 -10   23.11    0.91
  10   2 -10   22.10    0.80
   9   2 -10   12.60    0.54
   9  -2 -10   13.68    0.66
   9   2 -10   15.07    0.74
   9   2 -10   13.31    0.59
   8   2 -10    6.97    0.38
   8  -2 -10    6.38    0.47
   8   2 -10    6.59    0.51
   8   2 -10    6.80    0.42
   7   2 -10   27.27    0.73
   7  -2 -10   27.06    0.89
   7   2 -10   25.59    0.94
   7   2 -10   27.21    0.82
   7  -2 -10   26.61    1.20
   6   2 -10    9.63    0.42
   6  -2 -10    9.24    0.52
   6   2 -10    9.78    0.58
   6   2 -10   10.14    0.50
   6  -2 -10    8.71    0.71
   5  -2 -10    0.01    0.13
   5  -2 -10    0.14    0.22
   5   2 -10    0.04    0.09
   5   2 -10   -0.02    0.16
   5   2 -10    0.08    0.10
   4   2 -10   24.03    0.63
   4  -2 -10   23.79    0.77
   4   2 -10   22.69    0.86
   4   2 -10   23.58    0.78
   4  -2 -10   23.07    1.14
   3  -2 -10    3.32    0.47
   3   2 -10    3.73    0.32
   3   2 -10    4.34    0.39
   3   2 -10    3.54    0.28
   2  -2 -10   -0.19    0.22
   2   2 -10    0.15    0.09
  -2  -2  10    0.38    0.15
   2  -2 -10   -0.13    0.21
   2   2 -10    0.23    0.15
   2   2 -10   -0.08    0.13
  -2   2  10    0.17    0.12
   1  -2 -10    2.54    0.43
   1  -2 -10    3.08    0.42
   1  -2 -10    3.29    0.22
   1   2 -10    3.35    0.34
  -1   2  10    3.09    0.28
  -1  -2  10    3.10    0.32
   1   2 -10    2.92    0.30
   1   2 -10    3.22    0.26
   0   2 -10   -0.02    0.10
   0  -2 -10    0.09    0.21
   0  -2 -10    0.01    0.05
   0   2 -10   -0.02    0.15
   0   2  10    0.03    0.09
   0   2 -10    0.22    0.16
   0  -2 -10   -0.15    0.22
  -1   2 -10    0.43    0.13
  -1  -2 -10    0.16    0.24
   1   2  10    0.33    0.11
  -1   2 -10    0.16    0.14
  -1  -2 -10    0.34    0.05
  -1   2 -10    0.47    0.18
  -1  -2 -10    0.31    0.22
  -2   2 -10    1.57    0.22
  -2  -2 -10    1.31    0.34
   2   2  10    1.26    0.18
  -2   2 -10    1.48    0.23
  -2   2 -10    1.55    0.26
  -2  -2 -10    1.54    0.38
  -3   2 -10    0.06    0.12
  -3  -2 -10    0.53    0.28
   3   2  10    0.59    0.14
  -3   2 -10    0.25    0.15
  -3   2 -10    0.58    0.21
  -3  -2 -10    0.54    0.34
  -4  -2 -10    4.53    0.55
  -4   2 -10    4.84    0.47
  -4   2 -10    4.97    0.38
   4   2  10    5.01    0.32
  -4   2 -10    5.34    0.39
  -4  -2 -10    5.15    0.59
  -5   2 -10   17.53    0.88
  -5  -2 -10   15.47    0.99
  -5   2 -10   15.77    0.69
  -5  -2 -10   15.69    0.99
  -6  -2 -10    4.87    0.59
  -6   2 -10    4.95    0.41
  -6  -2 -10    5.02    0.59
  -7   2 -10    2.48    0.33
  -7  -2 -10    2.06    0.42
  -7  -2 -10    2.40    0.46
  -8  -2 -10    7.75    0.76
  -8   2 -10    8.23    0.57
  -8  -2 -10    8.09    0.77
  -9  -2 -10    4.17    0.60
  -9  -2 -10    4.56    0.60
  -9   2 -10    5.46    0.50
 -10  -2 -10    3.74    0.58
 -10  -2 -10    3.40    0.56
 -10   2 -10    3.96    0.46
 -11  -2 -10    5.14    0.68
 -11  -2 -10    6.35    0.75
 -11   2 -10    6.45    0.58
 -12  -2 -10    3.16    0.57
 -12  -2 -10    4.76    0.68
 -12   2 -10    4.09    0.48
 -13  -2 -10    6.58    0.79
 -13   2 -10    6.30    0.61
 -14  -2 -10    2.30    0.55
 -14  -2 -10    3.54    0.63
 -16   2 -10    0.61    0.36
  16  -2  10    0.64    0.35
 -24  -3  10    0.46    0.35
 -23  -3  10    0.35    0.33
 -22  -3  10    1.02    0.35
 -21  -3  10    0.29    0.28
  21  -3 -10    0.45    0.35
  21   3 -10    1.13    0.43
 -20  -3  10    0.08    0.24
  20   3 -10    0.63    0.35
  20  -3 -10    0.48    0.30
 -19  -3  10    0.20    0.22
  19   3 -10    0.29    0.35
  19  -3 -10    0.42    0.28
 -18  -3  10    3.03    0.41
  18   3 -10    3.82    0.56
  18  -3 -10    2.54    0.43
 -17  -3  10    0.05    0.21
  17  -3 -10    0.35    0.26
 -16  -3  10    2.14    0.33
  16   3 -10    2.18    0.41
  16  -3 -10    2.22    0.37
 -15  -3  10    0.41    0.19
  15   3 -10    0.52    0.31
  15  -3 -10    0.53    0.27
 -14  -3  10    2.74    0.32
  14  -3 -10    2.91    0.40
  14   3 -10    3.57    0.48
 -13  -3  10    0.46    0.18
  13  -3 -10    0.72    0.25
  13   3 -10    0.57    0.27
  12   3 -10    3.06    0.28
  12  -3 -10    3.45    0.39
  12   3 -10    3.72    0.49
  11   3 -10    0.31    0.10
  11  -3 -10    0.49    0.20
  11   3 -10    0.06    0.25
  10   3 -10    0.24    0.16
  10   3 -10    0.21    0.09
  10  -3 -10    0.37    0.19
  10   3 -10   -0.06    0.22
   9   3 -10    0.76    0.18
   9  -3 -10    0.98    0.22
   9   3 -10    0.45    0.23
   9   3 -10    0.76    0.11
   8   3 -10   14.23    0.39
   8   3 -10   13.99    0.79
   8  -3 -10   15.55    0.70
   8  -3 -10   14.12    0.94
   8   3 -10   14.38    0.56
   7   3 -10   25.28    0.48
   7   3 -10   25.32    1.05
   7  -3 -10   25.77    0.88
   7  -3 -10   24.19    1.23
   7   3 -10   26.36    0.69
   6   3 -10   21.19    0.45
   6  -3 -10   22.19    0.78
   6   3 -10   22.42    0.98
   6  -3 -10   22.16    1.18
   6   3 -10   21.27    0.55
   5   3 -10    7.22    0.29
   5  -3 -10    7.80    0.46
   5   3 -10    8.14    0.60
   5  -3 -10    7.42    0.70
   5   3 -10    7.19    0.29
   4   3 -10   24.52    0.58
   4  -3 -10   24.48    0.78
   4   3 -10   26.34    1.06
   4  -3 -10   23.75    1.22
   4   3 -10   22.11    0.42
   4   3 -10   23.24    0.46
   3   3 -10   11.60    0.44
   3  -3 -10   11.22    0.52
   3  -3 -10   10.47    0.51
   3   3 -10   11.38    0.71
   3  -3 -10   11.39    0.87
  -3   3  10   12.09    0.58
   2  -3 -10   17.38    0.62
   2   3 -10   18.13    0.86
   2  -3 -10   17.57    1.07
  -2  -3  10   18.06    0.67
  -2   3  10   18.08    0.66
   2  -3 -10   17.48    1.03
   1   3 -10   21.83    0.39
   1  -3 -10   22.04    0.67
   1   3 -10   22.63    0.95
   1  -3 -10   24.04    1.27
  -1  -3  10   23.39    0.79
  -1   3  10   23.31    0.72
   1  -3 -10   23.52    1.20
   0   3 -10   33.71    1.16
   0  -3 -10   34.38    1.51
   0  -3  10   32.07    0.99
   0   3  10   33.13    0.80
   0  -3 -10   31.58    1.39
  -1  -3 -10    6.26    0.67
  -1   3 -10    6.17    0.50
  -1   3 -10    5.42    0.19
  -1  -3 -10    5.64    0.64
  -2   3 -10    6.53    0.52
  -2   3 -10    6.69    0.26
  -2  -3 -10    7.00    0.72
  -2  -3 -10    6.37    0.68
  -3   3 -10   16.59    0.79
  -3  -3 -10   16.84    1.08
  -3   3 -10   16.11    0.46
  -3  -3 -10   14.87    1.00
  -4   3 -10   13.34    0.71
  -4  -3 -10   14.55    1.00
  -4  -3 -10   13.43    0.97
  -5  -3 -10    5.24    0.63
  -5   3 -10    5.11    0.46
  -5  -3 -10    5.04    0.62
  -6  -3 -10   13.65    1.00
  -6  -3 -10   13.71    1.01
  -7  -3 -10    7.17    0.76
  -7  -3 -10    7.63    0.79
  -8  -3 -10    5.21    0.69
  -8  -3 -10    5.72    0.70
  -9  -3 -10    3.20    0.56
  -9   3 -10    2.89    0.37
  -9  -3 -10    3.70    0.59
 -10  -3 -10    0.88    0.42
 -10   3 -10    0.58    0.24
 -10  -3 -10    1.06    0.41
 -11  -3 -10    1.27    0.49
 -11  -3 -10    0.66    0.40
 -12  -3 -10   -0.60    0.43
 -12  -3 -10    0.45    0.39
 -13  -3 -10    0.92    0.46
  19   4 -10    0.04    0.37
  19  -4 -10    0.18    0.28
  18   4 -10    0.13    0.35
  18  -4 -10    0.41    0.30
  17   4 -10    1.53    0.45
  17  -4 -10    1.96    0.42
  16   4 -10    1.22    0.36
  16  -4 -10    3.11    0.45
  15   4 -10    4.14    0.56
  15  -4 -10    3.69    0.49
  14   4 -10    0.57    0.32
  14  -4 -10    1.64    0.35
  13   4 -10    0.80    0.30
  13  -4 -10    1.59    0.34
  12   4 -10    0.21    0.28
  12  -4 -10    0.40    0.26
  11  -4 -10    8.27    0.60
  11   4 -10    6.85    0.66
  10   4 -10    6.78    0.67
  10  -4 -10    4.93    0.47
   9  -4 -10    3.92    0.58
   9  -4 -10    3.93    0.39
   9   4 -10    4.25    0.54
   8  -4 -10    1.46    0.40
   8  -4 -10    1.72    0.29
   8   4 -10    1.55    0.36
   7  -4 -10   -0.03    0.14
   7   4 -10    0.05    0.24
   7  -4 -10   -0.29    0.27
   6  -4 -10   -0.30    0.32
   6  -4 -10    0.01    0.14
   6   4 -10   -0.09    0.21
   5   4 -10   14.08    0.87
   5  -4 -10   15.14    0.65
   5  -4 -10   13.71    0.99
   4  -4 -10    4.18    0.58
   4  -4 -10    3.08    0.31
   4   4 -10    3.64    0.49
   3  -4 -10    0.05    0.24
   3  -4 -10   -0.11    0.13
   3  -4 -10   -0.38    0.38
   3   4 -10   -0.43    0.28
   2  -4 -10    0.01    0.29
   2  -4 -10   -0.08    0.31
   2   4 -10   -0.08    0.23
   2  -4 -10    0.07    0.11
   1  -4 -10    3.01    0.53
   1  -4 -10    3.37    0.54
   1   4 -10    3.01    0.43
   0  -4 -10    0.51    0.33
   0  -4 -10    0.41    0.30
   0   4 -10    0.23    0.24
  -1  -4 -10    3.77    0.60
  -1   4 -10    3.84    0.45
  -1  -4 -10    4.01    0.57
  -2  -4 -10    0.85    0.36
  -2   4 -10    0.83    0.30
  -2  -4 -10    0.79    0.36
  -3  -4 -10    0.01    0.25
  -3   4 -10    0.33    0.23
  -3  -4 -10    0.07    0.30
  -4  -4 -10    2.85    0.51
  -4   4 -10    2.69    0.41
  -4  -4 -10    2.64    0.52
  -5  -4 -10    2.44    0.54
  -5   4 -10    2.49    0.40
  -5  -4 -10    1.61    0.43
  -6  -4 -10    2.37    0.54
  -6  -4 -10    2.63    0.50
  -7  -4 -10    3.08    0.58
  -7  -4 -10    3.47    0.57
  -8  -4 -10    1.01    0.44
  -8  -4 -10    0.83    0.41
  -9  -4 -10    3.90    0.68
  -9  -4 -10    2.52    0.55
 -10  -4 -10    3.72    0.68
 -10  -4 -10    3.79    0.66
 -11  -4 -10    1.46    0.46
  17  -5 -10    0.47    0.31
  16   5 -10    0.43    0.34
  16  -5 -10    1.21    0.40
  15   5 -10    0.26    0.32
  15  -5 -10    0.07    0.26
  14   5 -10   -0.08    0.29
  14  -5 -10    0.41    0.25
  13   5 -10    0.17    0.34
  13  -5 -10   -0.09    0.21
  12   5 -10    0.20    0.31
  12  -5 -10    0.35    0.24
  11   5 -10   -0.10    0.31
  11  -5 -10    0.33    0.22
  10  -5 -10    0.13    0.29
  10   5 -10    0.74    0.36
  10  -5 -10    0.28    0.19
   9  -5 -10    1.35    0.45
   9   5 -10    1.32    0.42
   9  -5 -10    0.74    0.25
   8  -5 -10    0.49    0.40
   8   5 -10    0.93    0.36
   8  -5 -10    0.76    0.22
   7  -5 -10    0.63    0.36
   7  -5 -10    0.97    0.23
   7   5 -10    1.08    0.35
   6  -5 -10    2.93    0.56
   6  -5 -10    2.61    0.32
   6   5 -10    3.33    0.54
   5  -5 -10    2.70    0.54
   5  -5 -10    2.17    0.50
   4  -5 -10    2.03    0.50
   4   5 -10    2.17    0.48
   3  -5 -10    5.57    0.72
   3  -5 -10    5.79    0.73
   3   5 -10    5.81    0.64
   2  -5 -10    3.50    0.58
   2  -5 -10    3.45    0.59
   2   5 -10    3.39    0.50
   1  -5 -10    4.35    0.65
   1  -5 -10    5.12    0.68
   1   5 -10    5.90    0.63
   0   5 -10    6.32    0.65
   0  -5 -10    7.45    0.84
   0  -5 -10    6.23    0.76
  -1  -5 -10    4.98    0.71
  -1   5 -10    5.34    0.62
  -1  -5 -10    4.93    0.70
  -2  -5 -10    1.68    0.48
  -2   5 -10    1.66    0.40
  -2  -5 -10    2.50    0.52
  -3  -5 -10    0.42    0.35
  -3   5 -10    0.85    0.35
  -3  -5 -10    0.43    0.31
  -4  -5 -10    1.35    0.49
  -4   5 -10    2.54    0.47
  -4  -5 -10    2.75    0.58
  -5  -5 -10    0.31    0.35
  -5  -5 -10    0.12    0.32
  -6  -5 -10    0.16    0.31
  -6  -5 -10   -0.16    0.35
  -7  -5 -10    0.91    0.44
  -7  -5 -10    0.84    0.38
  -8  -5 -10    1.03    0.52
  -8  -5 -10   -0.06    0.35
  -9  -5 -10    0.39    0.38
  15  -6 -10    0.85    0.35
  14  -6 -10    0.41    0.30
  13  -6 -10    0.53    0.42
  13  -6 -10    0.43    0.28
  12  -6 -10    0.52    0.38
  12  -6 -10   -0.04    0.21
  11  -6 -10    0.37    0.39
  11  -6 -10    0.30    0.27
  10  -6 -10    0.56    0.40
  10   6 -10    0.15    0.36
   9  -6 -10    0.29    0.34
   9   6 -10    0.08    0.30
   8  -6 -10   -0.18    0.37
   8   6 -10    0.67    0.38
   7  -6 -10    0.28    0.38
   7  -6 -10   -0.12    0.33
   7   6 -10    0.10    0.34
   6  -6 -10    0.59    0.38
   6  -6 -10    0.49    0.33
   6   6 -10    0.60    0.38
   5  -6 -10   -0.02    0.40
   5  -6 -10   -0.32    0.36
   5   6 -10   -0.27    0.38
   4  -6 -10   -0.21    0.38
   4  -6 -10   -0.52    0.42
   4   6 -10    0.12    0.28
   3  -6 -10   -0.09    0.34
   3  -6 -10    0.16    0.36
   3   6 -10   -0.07    0.33
   2  -6 -10   -0.41    0.42
   2  -6 -10   -0.72    0.42
   2   6 -10   -0.14    0.32
   1  -6 -10    0.34    0.39
   1   6 -10   -0.49    0.38
   1  -6 -10    0.31    0.34
   0  -6 -10   -0.34    0.39
   0   6 -10    0.01    0.31
   0  -6 -10    0.41    0.35
  -1  -6 -10    0.88    0.46
  -1   6 -10    0.26    0.37
  -1  -6 -10    0.16    0.35
  -2  -6 -10    0.40    0.43
  -2   6 -10    0.30    0.35
  -2  -6 -10    0.02    0.34
  -3  -6 -10    0.15    0.34
  -3   6 -10    1.27    0.43
  -3  -6 -10    1.08    0.44
  -4  -6 -10    0.08    0.36
  -4   6 -10    0.63    0.42
  -4  -6 -10    0.38    0.31
  -5  -6 -10   -0.48    0.43
  -6  -6 -10   -1.15    0.49
  -7  -6 -10    0.50    0.42
   7  -7 -10   -0.19    0.36
   7  -7 -10    0.51    0.35
   6  -7 -10    0.26    0.35
   6  -7 -10    0.95    0.43
   5  -7 -10    0.57    0.44
   5  -7 -10    0.68    0.45
   4  -7 -10   -0.23    0.41
   4  -7 -10    0.07    0.35
   3  -7 -10   -0.74    0.54
   2  -7 -10   -0.41    0.48
   1  -7 -10    1.00    0.51
   0  -7 -10    0.26    0.41
 -23   0  11   -0.06    0.34
  23   0 -11    0.06    0.25
 -22   0  11    0.52    0.33
  22   0 -11    0.11    0.24
 -21   0  11    0.03    0.25
  21   0 -11    0.22    0.22
 -20   0  11   -0.15    0.26
  20   0 -11   -0.24    0.25
  19   0 -11   -0.03    0.25
 -19   0  11   -0.51    0.31
 -18   0  11   -0.48    0.35
  18   0 -11    0.05    0.21
  17   0 -11    0.12    0.20
  16   0 -11   -0.12    0.22
  15   0 -11    0.07    0.18
  14   0 -11    0.15    0.18
  13   0 -11   -0.17    0.21
  12   0 -11   -0.03    0.19
  11   0 -11    0.35    0.20
  10   0 -11    0.01    0.14
   9   0 -11   -0.19    0.18
   9   0 -11   -0.34    0.22
   8   0 -11    0.14    0.20
   7   0 -11   -0.03    0.17
   6   0 -11    0.03    0.16
   5   0 -11   -0.14    0.20
   4   0 -11   -0.06    0.17
   3   0 -11   -0.20    0.17
   3   0 -11    0.18    0.11
   2   0 -11    0.07    0.18
   2   0 -11    0.05    0.10
   2   0 -11   -0.07    0.18
   1   0 -11   -0.19    0.19
   1   0 -11   -0.07    0.11
   1   0 -11    0.28    0.22
   0   0 -11    0.25    0.21
   0   0 -11    0.12    0.09
   0   0 -11   -0.08    0.18
  -1   0 -11   -0.03    0.17
  -1   0 -11   -0.06    0.06
  -1   0 -11    0.11    0.21
  -2   0 -11   -0.20    0.21
  -2   0 -11    0.01    0.04
  -2   0 -11   -0.16    0.26
  -3   0 -11   -0.05    0.20
  -3   0 -11   -0.06    0.19
  -4   0 -11   -0.14    0.24
  -4   0 -11    0.14    0.25
  -5   0 -11   -0.17    0.22
  -5   0 -11   -0.35    0.23
  -6   0 -11    0.15    0.21
  -6   0 -11    0.16    0.28
  -7   0 -11    0.28    0.27
  -7   0 -11    0.03    0.25
  -8   0 -11    0.64    0.31
  -8   0 -11    0.19    0.32
  -9   0 -11   -0.20    0.27
  -9   0 -11    0.21    0.23
 -10   0 -11    0.11    0.26
 -10   0 -11    0.65    0.36
 -11   0 -11    0.11    0.27
 -11   0 -11    0.42    0.32
 -12   0 -11    0.11    0.30
 -13   0 -11   -0.26    0.28
 -14   0 -11   -0.47    0.34
 -15   0 -11    0.05    0.35
  24   1 -11    0.09    0.28
 -24  -1  11    0.25    0.32
  23   1 -11    0.63    0.32
 -23   1  11    0.12    0.26
 -23  -1  11    0.78    0.39
  23  -1 -11    0.94    0.40
  22   1 -11    0.64    0.32
 -22  -1  11    0.10    0.28
  22  -1 -11    0.15    0.29
  21   1 -11    0.23    0.23
 -21  -1  11    0.27    0.29
  21  -1 -11    0.31    0.30
  20   1 -11    1.64    0.40
 -20  -1  11    1.48    0.39
  20  -1 -11    1.94    0.43
  19   1 -11    0.52    0.24
 -19  -1  11    0.40    0.27
  19  -1 -11    0.69    0.32
  18   1 -11    0.19    0.22
 -18  -1  11   -0.09    0.24
  18  -1 -11    0.11    0.19
  17   1 -11    0.26    0.25
 -17  -1  11   -0.24    0.26
  17  -1 -11    0.00    0.23
  16   1 -11   -0.15    0.25
 -16  -1  11   -0.26    0.23
  16  -1 -11    0.04    0.19
  15   1 -11    1.84    0.33
  15  -1 -11    2.12    0.34
  14   1 -11    1.61    0.32
  14  -1 -11    1.49    0.31
  13  -1 -11   -0.04    0.20
  13   1 -11   -0.18    0.22
  12  -1 -11    1.91    0.31
  12   1 -11    1.60    0.29
  11  -1 -11    1.23    0.26
  10   1 -11    3.52    0.39
  10  -1 -11    4.02    0.40
   9  -1 -11    0.33    0.18
   9   1 -11    0.50    0.19
   8  -1 -11   -0.02    0.17
   8   1 -11    0.05    0.14
   8  -1 -11    0.04    0.20
   7  -1 -11    2.68    0.32
   7   1 -11    2.70    0.34
   7  -1 -11    2.86    0.41
   7   1 -11    3.39    0.34
   6   1 -11    0.10    0.16
   6  -1 -11    0.17    0.21
   6   1 -11    0.09    0.11
   6   1 -11    0.31    0.18
   6  -1 -11   -0.01    0.14
   5   1 -11   11.25    0.55
   5   1 -11   11.70    0.66
   5  -1 -11   11.92    0.80
   4   1 -11   11.67    0.55
   4   1 -11   11.45    0.67
   4  -1 -11   12.27    0.81
   3  -1 -11    0.22    0.19
   3   1 -11   -0.10    0.16
   3   1 -11   -0.11    0.15
   2  -1 -11    1.79    0.36
   2   1 -11    1.71    0.27
   2  -1 -11    1.40    0.31
   2   1 -11    2.19    0.25
   2   1 -11    1.96    0.31
   1  -1 -11    4.74    0.51
   1   1 -11    4.68    0.34
   1   1 -11    5.23    0.48
   1  -1 -11    4.89    0.22
   1   1 -11    5.37    0.44
   1  -1 -11    4.62    0.52
   0   1 -11    0.06    0.15
   0  -1 -11   -0.12    0.20
   0   1 -11    0.15    0.11
   0  -1 -11   -0.03    0.05
   0   1 -11   -0.04    0.21
   0  -1 -11   -0.06    0.20
  -1   1 -11    0.11    0.15
  -1  -1 -11    0.12    0.21
  -1   1 -11    0.08    0.11
  -1   1 -11    0.00    0.17
  -1  -1 -11    0.40    0.27
  -2   1 -11    6.98    0.37
  -2   1 -11    7.15    0.59
  -2  -1 -11    7.91    0.71
  -2   1 -11    7.18    0.52
  -2  -1 -11    6.70    0.61
  -3  -1 -11    6.11    0.58
  -3   1 -11    6.06    0.34
  -3   1 -11    6.59    0.57
  -3  -1 -11    6.45    0.65
  -3   1 -11    5.78    0.49
  -4   1 -11    1.46    0.28
  -4  -1 -11    0.84    0.29
  -4   1 -11    1.35    0.31
  -4  -1 -11    1.53    0.35
  -5  -1 -11    5.39    0.58
  -5   1 -11    6.19    0.60
  -5  -1 -11    5.98    0.65
  -5   1 -11    5.84    0.52
  -6   1 -11    1.54    0.30
  -6  -1 -11    1.46    0.37
  -6   1 -11    2.21    0.44
  -6  -1 -11    1.88    0.41
  -7   1 -11   -0.27    0.22
  -7  -1 -11    0.48    0.30
  -7   1 -11    0.36    0.27
  -7  -1 -11    0.30    0.25
  -8   1 -11    3.53    0.45
  -8  -1 -11    3.11    0.51
  -8   1 -11    3.26    0.49
  -8  -1 -11    3.92    0.56
  -9   1 -11    1.28    0.31
  -9  -1 -11    1.66    0.42
  -9   1 -11    2.04    0.44
  -9  -1 -11    1.24    0.39
 -10   1 -11    0.11    0.23
 -10  -1 -11   -0.15    0.30
 -11   1 -11   -0.02    0.22
 -11  -1 -11   -0.20    0.36
 -11  -1 -11   -0.04    0.33
 -12   1 -11    0.40    0.28
 -12  -1 -11    0.58    0.36
 -12  -1 -11    0.48    0.34
 -13  -1 -11    0.90    0.39
 -13  -1 -11    1.18    0.47
 -13   1 -11    0.80    0.36
 -14  -1 -11    0.43    0.37
 -14   1 -11    1.59    0.47
  15  -1  11    0.22    0.27
 -15   1 -11    0.44    0.34
 -16   1 -11    0.51    0.37
  24   2 -11   -0.17    0.32
 -24  -2  11    0.13    0.31
  23   2 -11   -0.06    0.29
 -23  -2  11    0.22    0.30
  22   2 -11    0.10    0.23
 -22  -2  11    0.89    0.37
  22  -2 -11    0.23    0.25
 -21  -2  11   -0.29    0.28
  21  -2 -11    0.03    0.25
  21   2 -11   -0.72    0.33
 -20  -2  11    0.24    0.27
  20  -2 -11    0.09    0.27
  20   2 -11    0.43    0.26
 -19  -2  11    1.54    0.36
  19  -2 -11    1.14    0.33
  19   2 -11    0.62    0.26
 -18  -2  11    0.18    0.23
  18  -2 -11    0.37    0.26
  18   2 -11    0.26    0.24
 -17  -2  11    0.08    0.21
  17  -2 -11    0.58    0.29
 -16  -2  11    0.41    0.21
  16  -2 -11    0.39    0.23
 -15  -2  11    3.57    0.40
  15  -2 -11    4.20    0.47
  14  -2 -11    1.49    0.33
  14   2 -11    2.51    0.41
  13  -2 -11    1.23    0.29
  13   2 -11    1.36    0.32
  12  -2 -11    1.51    0.30
  12   2 -11    1.71    0.36
  11   2 -11    0.16    0.18
  11  -2 -11    0.35    0.21
  11   2 -11    0.72    0.27
  10   2 -11    0.03    0.13
  10  -2 -11    0.35    0.21
  10   2 -11    0.33    0.23
   9   2 -11    1.75    0.25
   9  -2 -11    1.62    0.26
   9   2 -11    1.80    0.23
   9   2 -11    1.69    0.31
   8   2 -11    1.00    0.20
   8  -2 -11    1.27    0.25
   8  -2 -11    0.84    0.32
   8   2 -11    1.06    0.17
   8   2 -11    1.21    0.27
   7   2 -11    4.36    0.32
   7  -2 -11    3.68    0.48
   7  -2 -11    4.60    0.39
   7   2 -11    4.93    0.44
   7   2 -11    4.43    0.37
   6  -2 -11    1.22    0.23
   6  -2 -11    0.83    0.29
   6   2 -11    0.98    0.16
   6   2 -11    0.77    0.22
   6   2 -11    0.96    0.20
   5   2 -11    5.18    0.34
   5  -2 -11    5.24    0.40
   5   2 -11    5.45    0.45
   5   2 -11    5.31    0.41
   5  -2 -11    4.97    0.58
   4  -2 -11    2.51    0.44
   4   2 -11    2.28    0.23
   4   2 -11    2.78    0.34
   4   2 -11    2.72    0.31
   3  -2 -11    1.61    0.36
   3   2 -11    1.66    0.22
   3   2 -11    1.59    0.27
   3   2 -11    1.52    0.26
   2  -2 -11   -0.14    0.30
   2   2 -11    0.16    0.12
  -2  -2  11    0.40    0.18
   2  -2 -11    0.10    0.20
   2   2 -11    0.47    0.21
   2   2 -11    0.25    0.16
   1  -2 -11    0.52    0.26
   1   2 -11    0.78    0.17
   1  -2 -11    0.47    0.24
   1  -2 -11    0.71    0.11
   1   2 -11    0.58    0.19
   1   2 -11    0.58    0.19
   0   2 -11    0.09    0.12
   0  -2 -11    0.07    0.23
   0  -2 -11    0.13    0.06
   0   2 -11    0.28    0.17
   0   2  11    0.07    0.10
   0   2 -11    0.08    0.18
   0  -2 -11    0.04    0.24
  -1   2 -11    0.53    0.16
  -1  -2 -11    0.92    0.33
   1   2  11    0.52    0.14
  -1   2 -11    0.22    0.14
  -1   2 -11    1.08    0.26
  -1  -2 -11    0.71    0.31
  -2   2 -11    0.50    0.16
  -2  -2 -11    0.42    0.26
   2   2  11    0.41    0.15
  -2   2 -11    0.32    0.14
  -2   2 -11    0.80    0.24
  -2  -2 -11    0.99    0.38
  -3  -2 -11    3.91    0.53
  -3   2 -11    4.02    0.35
  -3   2 -11    4.54    0.45
  -3   2 -11    4.52    0.37
  -3  -2 -11    5.79    0.66
  -4   2 -11    3.08    0.32
  -4  -2 -11    3.54    0.52
  -4   2 -11    3.40    0.33
  -4   2 -11    3.36    0.43
  -4  -2 -11    3.76    0.53
  -5   2 -11    0.14    0.15
  -5  -2 -11    0.15    0.27
  -5   2 -11    0.12    0.20
  -5  -2 -11   -0.02    0.32
  -6   2 -11   -0.03    0.14
  -6  -2 -11   -0.26    0.24
  -7   2 -11    0.44    0.22
  -7  -2 -11   -0.25    0.33
  -7  -2 -11   -0.24    0.31
  -8   2 -11    3.35    0.40
  -8  -2 -11    3.20    0.56
  -8  -2 -11    3.60    0.59
  -9  -2 -11    0.71    0.37
  -9  -2 -11    1.18    0.42
  -9   2 -11    1.18    0.31
 -10  -2 -11    0.56    0.38
 -10  -2 -11    1.25    0.49
 -10   2 -11    0.59    0.27
 -11  -2 -11    0.03    0.37
 -11  -2 -11    0.57    0.35
 -11   2 -11    1.10    0.31
 -12  -2 -11    2.42    0.54
 -12  -2 -11    3.91    0.69
 -13  -2 -11    0.55    0.34
 -22  -3  11   -0.79    0.36
 -21  -3  11    0.61    0.32
 -20  -3  11   -0.18    0.23
  20  -3 -11   -0.23    0.30
 -19  -3  11    0.27    0.24
  19  -3 -11    0.72    0.29
 -18  -3  11    0.24    0.24
  18  -3 -11    0.08    0.24
  18   3 -11    0.73    0.40
 -17  -3  11   -0.14    0.21
  17  -3 -11   -0.28    0.27
  17   3 -11    0.45    0.33
 -16  -3  11   -0.25    0.19
  16  -3 -11    0.05    0.19
 -15  -3  11    0.90    0.22
  15  -3 -11    1.06    0.31
  15   3 -11    1.02    0.37
  14  -3 -11    0.30    0.23
  14   3 -11    0.72    0.33
  13  -3 -11    0.91    0.26
  13   3 -11    1.17    0.32
  12  -3 -11    2.07    0.34
  12   3 -11    2.32    0.41
  11  -3 -11    4.58    0.47
  11   3 -11    3.98    0.48
  10  -3 -11    4.79    0.44
  10   3 -11    5.18    0.31
  10   3 -11    4.52    0.50
   9  -3 -11    3.03    0.51
   9  -3 -11    2.95    0.36
   9   3 -11    2.23    0.20
   9   3 -11    1.73    0.34
   8  -3 -11    2.00    0.45
   8  -3 -11    1.82    0.30
   8   3 -11    0.79    0.25
   8   3 -11    1.54    0.16
   7  -3 -11    1.16    0.36
   7  -3 -11    1.07    0.24
   7   3 -11    1.52    0.34
   7   3 -11    1.04    0.13
   6   3 -11   48.13    0.84
   6  -3 -11   51.00    1.21
   6   3 -11   51.25    1.51
   6  -3 -11   50.53    1.81
   5   3 -11    9.65    0.40
   5  -3 -11    9.44    0.52
   5   3 -11   10.49    0.72
   5  -3 -11    8.47    0.76
   5   3 -11    9.46    0.38
   4  -3 -11    1.02    0.19
   4  -3 -11    0.18    0.26
   4   3 -11    0.93    0.12
   4   3 -11    1.12    0.29
   4   3 -11    0.93    0.15
   3  -3 -11   -0.09    0.31
   3   3 -11    0.13    0.05
   3  -3 -11   -0.14    0.31
   3  -3 -11    0.05    0.12
   3   3 -11   -0.10    0.20
   3   3 -11    0.27    0.13
   2  -3 -11    1.60    0.42
   2  -3 -11    1.64    0.38
   2   3 -11    1.60    0.33
   2   3 -11    1.76    0.24
  -2   3  11    1.83    0.25
   2   3 -11    1.40    0.10
   1   3 -11    8.27    0.60
   1  -3 -11    7.82    0.76
   1  -3 -11    7.77    0.74
   0   3 -11    6.09    0.52
   0  -3 -11    6.02    0.66
   0  -3 -11    6.37    0.69
  -1  -3 -11    6.49    0.70
  -1   3 -11    6.35    0.52
  -1  -3 -11    5.90    0.67
  -2  -3 -11    2.74    0.49
  -2   3 -11    2.54    0.35
  -2  -3 -11    2.73    0.51
  -3  -3 -11    0.46    0.35
  -3   3 -11    0.10    0.17
  -4   3 -11    6.79    0.52
  -4  -3 -11    8.13    0.82
  -4  -3 -11    7.08    0.74
  -5  -3 -11    6.65    0.75
  -5  -3 -11    7.66    0.79
  -6  -3 -11    1.74    0.47
  -6  -3 -11    1.16    0.42
  -7  -3 -11    0.32    0.29
  -7  -3 -11   -0.07    0.29
  -8  -3 -11    0.04    0.26
  -8  -3 -11    0.98    0.39
  -9  -3 -11    1.68    0.47
  -9  -3 -11    1.12    0.39
 -10  -3 -11    2.06    0.54
 -10  -3 -11    2.11    0.48
 -11  -3 -11    1.29    0.50
 -11  -3 -11    0.72    0.41
  19  -4 -11    1.35    0.37
  18   4 -11   -0.07    0.33
  18  -4 -11    0.72    0.33
  17   4 -11   -0.48    0.37
  17  -4 -11    0.43    0.28
  16   4 -11    0.78    0.34
  16  -4 -11    1.44    0.37
  15  -4 -11    2.48    0.42
  15   4 -11    1.29    0.40
  14  -4 -11    0.06    0.23
  14   4 -11   -0.26    0.34
  13  -4 -11    0.26    0.21
  13   4 -11   -0.15    0.35
  12  -4 -11    3.56    0.44
  12   4 -11    1.91    0.39
  11  -4 -11    0.28    0.24
  11   4 -11   -0.26    0.32
  10  -4 -11    0.53    0.36
  10  -4 -11    0.17    0.20
  10   4 -11    0.35    0.30
   9  -4 -11    3.06    0.56
   9  -4 -11    2.53    0.35
   9   4 -11    3.34    0.50
   8  -4 -11    0.68    0.33
   8  -4 -11    0.79    0.23
   8   4 -11    0.20    0.27
   7  -4 -11    0.11    0.27
   7  -4 -11    0.16    0.18
   7   4 -11    0.22    0.24
   6  -4 -11    1.25    0.38
   6  -4 -11    1.27    0.25
   6   4 -11    1.15    0.36
   5  -4 -11    4.65    0.63
   5  -4 -11    4.91    0.39
   5   4 -11    5.30    0.58
   4  -4 -11    0.49    0.17
   4  -4 -11    0.81    0.35
   4  -4 -11    0.00    0.33
   4   4 -11    0.26    0.26
   3  -4 -11   -0.28    0.34
   3  -4 -11   -0.25    0.32
   3   4 -11    0.03    0.25
   3  -4 -11    0.04    0.12
   2  -4 -11   -0.25    0.31
   2  -4 -11    0.20    0.28
   2   4 -11   -0.23    0.24
   1  -4 -11    0.37    0.32
   1  -4 -11    0.44    0.34
   1   4 -11    0.46    0.26
   0  -4 -11    0.27    0.34
   0   4 -11   -0.08    0.25
   0  -4 -11    0.04    0.30
  -1  -4 -11    0.90    0.35
  -1   4 -11    1.18    0.31
  -1  -4 -11    0.78    0.31
  -2  -4 -11    0.67    0.36
  -2   4 -11    0.36    0.23
  -2  -4 -11    0.71    0.36
  -3  -4 -11    0.60    0.40
  -3   4 -11    0.26    0.25
  -3  -4 -11    0.56    0.42
  -4  -4 -11    0.56    0.33
  -4   4 -11    1.68    0.36
  -4  -4 -11    0.77    0.39
  -5  -4 -11    0.16    0.31
  -5  -4 -11   -0.46    0.44
  -6  -4 -11    4.37    0.67
  -6  -4 -11    3.51    0.61
  -7  -4 -11    1.67    0.45
  -7  -4 -11    1.75    0.49
  -8  -4 -11    2.58    0.56
  -8  -4 -11    2.67    0.54
  -9  -4 -11    0.34    0.43
  -9  -4 -11    0.45    0.35
 -10  -4 -11    1.64    0.49
  17  -5 -11    0.31    0.28
  16  -5 -11    0.53    0.29
  15   5 -11   -0.20    0.33
  15  -5 -11    0.49    0.28
  14   5 -11    0.12    0.33
  14  -5 -11   -0.12    0.20
  13   5 -11    0.49    0.39
  13  -5 -11    0.68    0.27
  12  -5 -11   -0.22    0.36
  12   5 -11   -0.10    0.31
  12  -5 -11    0.19    0.22
  11  -5 -11    0.12    0.34
  11  -5 -11    0.34    0.22
  11   5 -11    0.50    0.37
  10  -5 -11    2.29    0.51
  10  -5 -11    2.26    0.36
  10   5 -11    2.08    0.48
   9  -5 -11    2.09    0.52
   9  -5 -11    2.38    0.35
   9   5 -11    2.53    0.50
   8  -5 -11    2.00    0.50
   8  -5 -11    2.87    0.36
   8   5 -11    1.95    0.44
   7  -5 -11    2.11    0.50
   7  -5 -11    2.50    0.35
   7   5 -11    2.03    0.46
   6  -5 -11    3.33    0.60
   6   5 -11    3.15    0.55
   5  -5 -11    1.55    0.43
   5  -5 -11    1.70    0.47
   5   5 -11    1.68    0.42
   4  -5 -11    4.79    0.69
   4  -5 -11    5.17    0.72
   4   5 -11    5.89    0.68
   3  -5 -11    5.42    0.74
   3  -5 -11    6.03    0.76
   3   5 -11    5.46    0.65
   2  -5 -11    4.14    0.65
   2  -5 -11    4.84    0.70
   2   5 -11    4.04    0.57
   1  -5 -11   -0.01    0.32
   1   5 -11   -0.16    0.33
   1  -5 -11   -0.33    0.37
   0  -5 -11    0.55    0.34
   0   5 -11    0.75    0.31
   0  -5 -11    1.67    0.49
  -1  -5 -11    7.29    0.86
  -1   5 -11    8.21    0.77
  -1  -5 -11    8.04    0.86
  -2  -5 -11    5.74    0.77
  -2   5 -11    6.16    0.65
  -2  -5 -11    5.38    0.77
  -3  -5 -11    1.58    0.47
  -3   5 -11    2.33    0.47
  -3  -5 -11    2.40    0.55
  -4   5 -11    1.77    0.43
  -4  -5 -11    1.85    0.53
  -5  -5 -11   -0.14    0.41
  -5  -5 -11    0.20    0.37
  -6  -5 -11    3.07    0.65
  -6  -5 -11    2.17    0.53
  -7  -5 -11   -0.02    0.35
  -8  -5 -11    1.88    0.52
  15  -6 -11    0.64    0.33
  14  -6 -11    0.27    0.29
  13  -6 -11    0.31    0.30
  11  -6 -11    1.25    0.50
  10  -6 -11    0.44    0.37
   9  -6 -11    0.43    0.41
   8  -6 -11   -0.08    0.36
   8  -6 -11   -0.25    0.34
   8   6 -11   -0.65    0.40
   7  -6 -11    0.58    0.38
   7  -6 -11   -0.03    0.40
   7   6 -11    0.34    0.34
   6  -6 -11   -0.21    0.43
   6  -6 -11   -0.75    0.46
   6   6 -11   -0.01    0.32
   5  -6 -11    0.41    0.37
   5  -6 -11    0.59    0.38
   5   6 -11    0.35    0.31
   4  -6 -11    1.24    0.45
   4  -6 -11    1.86    0.54
   4   6 -11    2.15    0.53
   3  -6 -11    0.27    0.36
   3  -6 -11   -0.17    0.35
   3   6 -11   -0.07    0.33
   2  -6 -11   -0.37    0.44
   2  -6 -11   -0.43    0.36
   2   6 -11   -0.27    0.36
   1  -6 -11    1.17    0.49
   1   6 -11    1.23    0.44
   1  -6 -11    0.19    0.38
   0  -6 -11    0.63    0.43
   0   6 -11    1.15    0.44
   0  -6 -11    0.56    0.41
  -1  -6 -11    2.51    0.59
  -1   6 -11    1.55    0.43
  -1  -6 -11    2.48    0.61
  -2  -6 -11    0.26    0.37
  -2   6 -11    0.19    0.30
  -2  -6 -11    0.40    0.36
  -3   6 -11    0.59    0.34
  -3  -6 -11    0.61    0.42
  -4   6 -11    0.87    0.40
  -4  -6 -11    0.04    0.32
  23   0 -12    0.80    0.38
 -23   0  12    0.33    0.35
  22   0 -12    3.30    0.53
  21   0 -12    7.49    0.72
  20   0 -12    0.32    0.26
  19   0 -12    3.57    0.50
  18   0 -12    2.05    0.39
  17   0 -12    4.30    0.49
  16   0 -12    3.65    0.44
  15   0 -12    5.67    0.54
  14   0 -12    1.36    0.29
  13   0 -12    1.81    0.32
  12   0 -12    2.51    0.37
  11   0 -12   18.29    0.87
  10   0 -12    2.87    0.44
  10   0 -12    3.00    0.36
   9   0 -12    1.25    0.33
   8   0 -12    1.06    0.27
   7   0 -12   -0.11    0.21
   6   0 -12    1.40    0.32
   5   0 -12    3.57    0.45
   4   0 -12   37.51    0.85
   4   0 -12   37.50    1.37
   3   0 -12   35.08    0.81
   3   0 -12   34.89    1.32
   3   0 -12   34.36    1.24
   2   0 -12    2.02    0.33
   2   0 -12    2.26    0.21
   2   0 -12    1.96    0.34
   1   0 -12   18.68    0.56
   1   0 -12   20.09    1.04
   1   0 -12   19.67    0.96
   0   0 -12   38.90    0.73
   0   0 -12   41.87    1.48
   0   0 -12   39.84    1.38
  -1   0 -12   31.28    0.58
  -1   0 -12   34.92    1.38
  -1   0 -12   34.71    1.29
  -2   0 -12   17.66    1.00
  -2   0 -12   16.86    0.93
  -3   0 -12   15.26    0.96
  -3   0 -12   14.91    0.88
  -4   0 -12   17.40    1.03
  -4   0 -12   15.76    0.94
  -5   0 -12    0.77    0.30
  -5   0 -12    0.23    0.28
  -6   0 -12   15.43    1.03
  -6   0 -12   16.14    0.98
  -7   0 -12   24.67    1.31
  -7   0 -12   23.44    1.20
  -8   0 -12    7.93    0.78
  -8   0 -12    7.57    0.72
  -9   0 -12    9.27    0.86
  -9   0 -12    8.48    0.76
 -10   0 -12    9.04    0.91
 -10   0 -12    7.52    0.73
 -11   0 -12    6.57    0.73
 -11   0 -12    4.46    0.64
 -12   0 -12    3.88    0.60
 -13   0 -12    2.49    0.52
 -14   0 -12    3.57    0.62
  23   1 -12    0.03    0.25
 -23  -1  12    0.19    0.28
  22   1 -12    0.11    0.30
 -22  -1  12   -0.47    0.35
  22  -1 -12   -0.03    0.26
  21   1 -12    0.85    0.36
 -21  -1  12    0.66    0.32
  21  -1 -12    0.89    0.34
  20   1 -12    0.12    0.25
 -20  -1  12   -0.08    0.28
  20  -1 -12   -0.05    0.26
  19   1 -12    0.91    0.30
 -19  -1  12    0.54    0.29
  19  -1 -12    0.52    0.32
  18   1 -12   -0.20    0.28
  18  -1 -12    0.14    0.25
  17   1 -12    2.51    0.41
  17  -1 -12    3.11    0.45
  16   1 -12    1.01    0.31
  16  -1 -12    1.10    0.28
  15   1 -12    0.95    0.27
  15  -1 -12    1.41    0.32
  14   1 -12    6.15    0.57
  14  -1 -12    5.25    0.51
  13  -1 -12    6.63    0.56
  12  -1 -12    4.86    0.47
  11  -1 -12   17.36    0.84
  11   1 -12   19.21    0.94
  10  -1 -12   16.63    0.81
  10   1 -12   16.32    0.86
  10  -1 -12   18.52    1.03
   9  -1 -12   27.29    1.01
   9   1 -12   28.13    1.09
   9  -1 -12   29.10    1.30
   8  -1 -12   11.82    0.66
   8   1 -12   13.32    0.64
   8   1 -12   12.43    0.73
   8  -1 -12   11.87    0.84
   7   1 -12   36.81    1.03
   7   1 -12   35.60    1.20
   7  -1 -12   35.39    1.42
   6   1 -12   16.26    0.67
   6   1 -12   15.18    0.80
   6  -1 -12   14.77    0.92
   5   1 -12   25.64    0.85
   5   1 -12   25.77    1.05
   5  -1 -12   26.06    1.22
   4   1 -12   35.23    0.98
   4   1 -12   36.85    1.25
   4  -1 -12   37.15    1.46
   3   1 -12   18.22    0.68
   3   1 -12   19.79    0.94
   3  -1 -12   20.12    1.09
   3   1 -12   19.56    0.85
   2   1 -12   18.57    0.70
   2   1 -12   19.44    0.93
   2  -1 -12   19.41    1.07
   2   1 -12   19.10    0.85
   2  -1 -12   18.43    0.98
   1   1 -12   27.55    0.82
   1   1 -12   27.68    1.14
   1  -1 -12   27.61    0.53
   1  -1 -12   27.03    1.28
   1   1 -12   27.49    1.03
   1  -1 -12   27.06    1.21
   0   1 -12   21.91    0.71
   0   1 -12   21.00    1.01
   0  -1 -12   21.53    1.15
   0   1 -12   19.69    0.87
   0  -1 -12   20.92    1.07
  -1   1 -12    5.99    0.37
  -1   1 -12    7.01    0.60
  -1  -1 -12    5.64    0.62
  -1   1 -12    6.54    0.52
  -1  -1 -12    6.06    0.62
  -2   1 -12    8.71    0.42
  -2   1 -12    9.99    0.73
  -2  -1 -12    9.64    0.80
  -2   1 -12    9.00    0.63
  -2  -1 -12   10.10    0.79
  -3   1 -12   17.19    0.57
  -3   1 -12   18.14    1.00
  -3  -1 -12   18.99    1.13
  -3   1 -12   18.09    0.89
  -3  -1 -12   19.74    1.08
  -4   1 -12    0.40    0.24
  -4  -1 -12    0.44    0.29
  -4   1 -12    0.38    0.29
  -4  -1 -12    0.33    0.26
  -5   1 -12    1.18    0.31
  -5  -1 -12    0.90    0.32
  -5   1 -12    0.76    0.32
  -5  -1 -12    1.42    0.40
  -6   1 -12   -0.13    0.20
  -6  -1 -12   -0.36    0.28
  -6   1 -12    0.30    0.28
  -6  -1 -12    0.08    0.28
  -7   1 -12   -0.33    0.26
  -7  -1 -12    0.30    0.31
  -7   1 -12    0.28    0.31
  -7  -1 -12    0.06    0.30
  -8   1 -12   -0.13    0.21
  -8  -1 -12    0.03    0.26
  -8   1 -12   -0.36    0.29
  -8  -1 -12   -0.10    0.33
  -9   1 -12    1.71    0.38
  -9  -1 -12    1.73    0.45
  -9   1 -12    1.88    0.46
  -9  -1 -12    1.46    0.46
 -10   1 -12    1.22    0.35
 -10  -1 -12    1.04    0.38
 -10  -1 -12    1.26    0.40
 -11   1 -12    1.07    0.35
 -11  -1 -12    0.26    0.36
 -11  -1 -12    0.74    0.42
 -12   1 -12    1.21    0.41
 -12  -1 -12    0.55    0.39
 -12  -1 -12    1.29    0.45
 -13  -1 -12    1.38    0.46
 -13   1 -12    2.09    0.46
 -14   1 -12    1.27    0.42
 -15   1 -12    0.17    0.32
 -24  -2  12   -0.15    0.38
 -23  -2  12   -0.51    0.33
  23   2 -12   -0.46    0.33
 -22  -2  12    0.14    0.28
  22   2 -12    0.53    0.29
 -21  -2  12    1.80    0.40
  21  -2 -12    2.01    0.45
  21   2 -12    1.56    0.39
 -20  -2  12    1.12    0.32
  20  -2 -12    0.91    0.32
 -19  -2  12    0.41    0.24
  19  -2 -12    0.70    0.31
 -18  -2  12    2.82    0.41
  18  -2 -12    2.86    0.46
  17  -2 -12    6.00    0.60
  16  -2 -12    0.22    0.24
  16   2 -12    1.28    0.36
  15  -2 -12    1.12    0.32
  15   2 -12    2.04    0.39
  14  -2 -12    7.58    0.63
  14   2 -12    8.65    0.65
  13  -2 -12    2.79    0.39
  13   2 -12    2.57    0.42
  12   2 -12    0.25    0.19
  12  -2 -12   -0.01    0.19
  12   2 -12    0.32    0.25
  11   2 -12    1.00    0.23
  11  -2 -12    1.02    0.25
  11   2 -12    1.54    0.34
  10   2 -12    0.20    0.14
  10  -2 -12    0.06    0.16
  10  -2 -12    0.19    0.24
  10   2 -12    0.18    0.22
   9  -2 -12    7.09    0.52
   9   2 -12    7.41    0.56
   9   2 -12    7.44    0.51
   9  -2 -12    6.14    0.66
   8   2 -12    3.53    0.32
   8  -2 -12    3.71    0.54
   8  -2 -12    4.48    0.42
   8   2 -12    3.63    0.36
   8   2 -12    3.70    0.41
   7  -2 -12   -0.16    0.17
   7  -2 -12    0.00    0.20
   7   2 -12    0.02    0.11
   7   2 -12   -0.01    0.20
   7   2 -12    0.09    0.14
   6   2 -12    7.31    0.42
   6  -2 -12    6.38    0.47
   6   2 -12    6.37    0.50
   6   2 -12    6.48    0.48
   6  -2 -12    7.20    0.69
   5  -2 -12    5.35    0.63
   5   2 -12    5.79    0.38
   5   2 -12    5.54    0.45
   5   2 -12    5.70    0.45
   4   2 -12    8.76    0.47
   4   2 -12    8.44    0.55
   4   2 -12    8.82    0.57
   4  -2 -12    8.39    0.77
   4   2 -12    8.23    0.50
   3  -2 -12    3.15    0.49
   3  -2 -12    2.89    0.47
   3   2 -12    3.04    0.36
   3   2 -12    3.01    0.35
   3   2 -12    3.38    0.32
   2  -2 -12    2.05    0.40
   2   2 -12    2.75    0.28
   2  -2 -12    2.80    0.45
   2   2 -12    2.98    0.35
   2   2 -12    3.19    0.35
   1   2 -12   12.54    0.69
   1   2 -12   12.38    0.65
   1  -2 -12   12.08    0.93
   1   2 -12   12.07    0.58
   1  -2 -12   12.33    0.90
   0   2 -12   29.59    1.10
   0   2 -12   28.40    0.98
   0  -2 -12   28.46    1.40
   0   2 -12   28.37    0.90
   0  -2 -12   27.50    1.32
  -1   2 -12    7.99    0.60
  -1   2 -12    6.49    0.46
  -1  -2 -12    7.72    0.78
  -1   2 -12    7.23    0.47
  -1  -2 -12    7.23    0.71
  -2   2 -12   15.61    0.86
  -2   2 -12   15.36    0.69
  -2  -2 -12   16.37    1.11
  -2   2 -12   15.86    0.71
  -2  -2 -12   14.38    0.98
  -3   2 -12    9.35    0.70
  -3   2 -12    9.04    0.53
  -3  -2 -12   10.19    0.88
  -3   2 -12    9.03    0.56
  -3  -2 -12    9.27    0.81
  -4   2 -12   10.97    0.77
  -4   2 -12    9.36    0.53
  -4  -2 -12   10.83    0.91
  -4   2 -12    9.85    0.59
  -4  -2 -12   10.76    0.90
  -5   2 -12   10.83    0.79
  -5  -2 -12   10.78    0.92
  -5   2 -12   10.36    0.63
  -5  -2 -12   10.31    0.90
  -6  -2 -12   16.02    1.13
  -6   2 -12   13.77    0.75
  -6  -2 -12   14.06    1.04
  -7  -2 -12   11.26    0.96
  -7   2 -12   11.99    0.71
  -7  -2 -12   11.09    0.95
  -8  -2 -12    9.69    0.91
  -8   2 -12    9.52    0.66
  -8  -2 -12    8.78    0.88
  -9  -2 -12    6.92    0.83
  -9  -2 -12    8.27    0.88
 -10  -2 -12    3.76    0.68
 -10  -2 -12    3.27    0.63
 -11  -2 -12    2.50    0.57
 -11  -2 -12    4.76    0.75
 -12  -2 -12    1.27    0.46
  20  -3 -12   -0.10    0.28
  20   3 -12    0.64    0.38
  19  -3 -12    0.49    0.31
  19   3 -12    1.29    0.43
  18  -3 -12    0.59    0.31
  18   3 -12    1.62    0.43
  17  -3 -12    3.18    0.46
  17   3 -12    3.86    0.56
  16  -3 -12    0.32    0.27
  16   3 -12    1.05    0.37
  15  -3 -12    0.98    0.32
  15   3 -12    1.08    0.39
  14  -3 -12    2.53    0.40
  14   3 -12    3.37    0.51
  13  -3 -12    2.76    0.41
  13   3 -12    2.14    0.40
  12   3 -12   12.49    0.84
  12  -3 -12   12.96    0.77
  11  -3 -12   20.52    0.93
  11   3 -12   21.06    1.05
  10  -3 -12    8.57    0.60
  10   3 -12    8.74    0.69
  10  -3 -12    7.38    0.77
   9  -3 -12    4.31    0.42
   9  -3 -12    3.74    0.58
   9   3 -12    2.91    0.43
   8  -3 -12   15.10    0.75
   8   3 -12   13.12    0.81
   8  -3 -12   13.78    1.02
   7  -3 -12   10.35    0.61
   7   3 -12    9.13    0.42
   7   3 -12    9.63    0.69
   7  -3 -12    8.47    0.81
   6  -3 -12    2.41    0.31
   6  -3 -12    2.57    0.48
   6   3 -12    2.82    0.25
   6   3 -12    3.19    0.44
   5  -3 -12    5.68    0.66
   5  -3 -12    6.09    0.45
   5   3 -12    6.70    0.38
   5   3 -12    6.78    0.59
   5   3 -12    6.51    0.34
   4   3 -12   18.66    0.66
   4   3 -12   18.26    0.92
   4  -3 -12   18.86    1.18
   3  -3 -12    4.65    0.63
   3  -3 -12    4.50    0.59
   3   3 -12    4.86    0.37
   3   3 -12    5.24    0.50
   2  -3 -12    3.29    0.54
   2  -3 -12    2.90    0.50
   2   3 -12    3.93    0.35
   2   3 -12    4.24    0.47
   1  -3 -12    3.82    0.58
   1   3 -12    4.71    0.41
   1   3 -12    4.52    0.48
   1  -3 -12    4.37    0.61
   0   3 -12    6.14    0.54
   0  -3 -12    7.19    0.80
   0  -3 -12    6.47    0.73
  -1  -3 -12    4.62    0.64
  -1   3 -12    3.55    0.41
  -1  -3 -12    5.17    0.68
  -2  -3 -12    3.31    0.55
  -2   3 -12    4.27    0.45
  -2  -3 -12    3.93    0.60
  -3  -3 -12    2.20    0.51
  -3   3 -12    2.91    0.38
  -3  -3 -12    2.75    0.51
  -4  -3 -12    0.57    0.32
  -4   3 -12    0.85    0.24
  -5  -3 -12   -0.13    0.30
  -5  -3 -12    0.18    0.32
  -6  -3 -12    0.37    0.35
  -6  -3 -12   -0.11    0.39
  -7  -3 -12    1.95    0.54
  -7  -3 -12    1.82    0.50
  -8  -3 -12    0.20    0.38
  -8  -3 -12   -0.03    0.35
  -9  -3 -12    1.11    0.41
  -9  -3 -12    1.13    0.50
 -10  -3 -12    0.63    0.41
 -10  -3 -12    1.21    0.48
  18  -4 -12   -0.16    0.29
  18   4 -12    0.11    0.35
  17  -4 -12    0.48    0.32
  17   4 -12   -0.56    0.45
  16  -4 -12    0.54    0.27
  16   4 -12   -0.17    0.40
  15  -4 -12    0.02    0.24
  15   4 -12   -0.21    0.37
  14  -4 -12    0.31    0.25
  14   4 -12   -0.81    0.45
  13  -4 -12    0.86    0.29
  13   4 -12   -0.41    0.40
  12  -4 -12    1.06    0.32
  12   4 -12   -0.59    0.45
  11  -4 -12    0.61    0.36
  11  -4 -12    0.49    0.23
  11   4 -12    0.48    0.33
  10  -4 -12   -0.52    0.35
  10  -4 -12    0.28    0.22
  10   4 -12    0.17    0.27
   9  -4 -12    0.41    0.35
   9  -4 -12   -0.01    0.16
   9   4 -12    0.69    0.33
   8  -4 -12    0.74    0.39
   8  -4 -12    0.60    0.23
   8   4 -12    0.32    0.30
   7  -4 -12    1.15    0.42
   7  -4 -12    0.97    0.25
   7   4 -12    1.25    0.37
   6  -4 -12   -0.03    0.30
   6  -4 -12    0.09    0.14
   6   4 -12    0.06    0.26
   5  -4 -12    0.28    0.16
   5  -4 -12    0.34    0.34
   5   4 -12    1.02    0.35
   4  -4 -12    5.57    0.72
   4  -4 -12    5.89    0.74
   4  -4 -12    5.40    0.42
   4   4 -12    5.79    0.63
   3  -4 -12    3.85    0.60
   3  -4 -12    4.73    0.66
   3   4 -12    4.88    0.57
   2  -4 -12    2.53    0.52
   2  -4 -12    2.64    0.57
   2   4 -12    2.42    0.40
   1  -4 -12    3.99    0.61
   1   4 -12    4.85    0.55
   1  -4 -12    4.77    0.67
   0   4 -12    6.79    0.64
   0  -4 -12    7.20    0.79
   0  -4 -12    7.32    0.81
  -1  -4 -12    5.17    0.71
  -1   4 -12    4.00    0.51
  -1  -4 -12    4.06    0.67
  -2  -4 -12    2.55    0.57
  -2   4 -12    2.30    0.40
  -2  -4 -12    2.51    0.55
  -3  -4 -12    4.16    0.67
  -3   4 -12    4.59    0.53
  -3  -4 -12    4.28    0.65
  -4  -4 -12    7.28    0.85
  -4   4 -12    6.77    0.64
  -4  -4 -12    7.50    0.87
  -5  -4 -12    1.95    0.53
  -5  -4 -12    1.38    0.45
  -6  -4 -12    3.24    0.64
  -6  -4 -12    4.29    0.68
  -7  -4 -12    3.28    0.66
  -7  -4 -12    3.16    0.63
  -8  -4 -12    2.27    0.57
  17  -5 -12    0.04    0.27
  16  -5 -12    0.21    0.26
  15  -5 -12    0.16    0.24
  14  -5 -12    0.25    0.24
  14   5 -12    0.45    0.41
  13  -5 -12    1.34    0.52
  13  -5 -12    1.08    0.33
  13   5 -12    1.03    0.38
  12  -5 -12    0.91    0.45
  12  -5 -12    0.37    0.22
  12   5 -12    0.74    0.42
  11  -5 -12    0.25    0.40
  11  -5 -12    0.36    0.22
  11   5 -12    0.55    0.35
  10  -5 -12    3.57    0.65
  10  -5 -12    3.11    0.41
  10   5 -12    3.79    0.62
   9  -5 -12    5.00    0.73
   9  -5 -12    4.75    0.47
   9   5 -12    4.18    0.62
   8  -5 -12    0.51    0.36
   8   5 -12    0.95    0.41
   7  -5 -12   -0.07    0.36
   7   5 -12    0.51    0.32
   6  -5 -12    1.38    0.49
   6  -5 -12    1.59    0.45
   6   5 -12    1.47    0.43
   5  -5 -12    4.73    0.73
   5  -5 -12    4.40    0.71
   5   5 -12    4.23    0.59
   4  -5 -12    4.43    0.71
   4  -5 -12    3.18    0.60
   4   5 -12    4.19    0.59
   3  -5 -12    0.47    0.39
   3  -5 -12    0.59    0.33
   3   5 -12   -0.09    0.26
   2  -5 -12   -0.14    0.34
   2  -5 -12   -0.20    0.38
   2   5 -12    0.12    0.27
   1  -5 -12    0.28    0.35
   1   5 -12   -0.45    0.35
   1  -5 -12   -0.38    0.39
   0  -5 -12    0.22    0.35
   0   5 -12    0.21    0.26
   0  -5 -12    0.26    0.31
  -1  -5 -12    0.13    0.37
  -1   5 -12    0.07    0.28
  -1  -5 -12   -0.02    0.32
  -2  -5 -12   -0.13    0.39
  -2   5 -12    0.05    0.28
  -2  -5 -12   -0.30    0.37
  -3  -5 -12   -0.10    0.38
  -3   5 -12   -0.13    0.26
  -4  -5 -12   -0.48    0.40
  -4   5 -12    0.33    0.32
  -4  -5 -12    0.25    0.41
  -5  -5 -12   -0.28    0.40
  -6  -5 -12   -0.72    0.49
   9  -6 -12    0.44    0.35
   8  -6 -12   -1.11    0.55
   8  -6 -12   -0.12    0.40
   7  -6 -12    0.56    0.44
   7  -6 -12   -0.30    0.35
   6  -6 -12    0.48    0.45
   6  -6 -12    1.32    0.50
   6   6 -12    0.59    0.40
   5  -6 -12    0.71    0.47
   5  -6 -12    0.39    0.36
   5   6 -12    0.17    0.36
   4  -6 -12   -0.69    0.48
   4  -6 -12   -0.32    0.42
   4   6 -12   -0.12    0.33
   3  -6 -12    0.23    0.38
   3  -6 -12    0.02    0.36
   3   6 -12    0.19    0.36
   2  -6 -12    1.83    0.58
   2   6 -12    1.27    0.44
   2  -6 -12    0.90    0.45
   1   6 -12   -0.12    0.36
   1  -6 -12    0.48    0.34
   0   6 -12    1.78    0.45
   0  -6 -12    1.87    0.54
  -1   6 -12    0.06    0.31
  -1  -6 -12    1.06    0.44
  22   0 -13   -0.01    0.27
  21   0 -13   -0.23    0.30
  20   0 -13    0.27    0.28
  19   0 -13   -0.33    0.30
  18   0 -13   -0.32    0.27
  17   0 -13    0.09    0.24
  16   0 -13   -0.03    0.24
  15   0 -13   -0.03    0.25
  14   0 -13    0.07    0.18
  13   0 -13    1.06    0.31
  12   0 -13   -0.44    0.27
  11   0 -13   -0.06    0.22
  11   0 -13   -0.15    0.21
  10   0 -13    0.10    0.25
   9   0 -13   -0.26    0.23
   8   0 -13   -0.14    0.21
   7   0 -13    0.34    0.25
   6   0 -13    0.08    0.20
   5   0 -13   -0.12    0.24
   5   0 -13    0.31    0.17
   4   0 -13    0.03    0.21
   4   0 -13    0.29    0.15
   3   0 -13    0.13    0.22
   3   0 -13    0.08    0.10
   3   0 -13   -0.12    0.20
   2   0 -13   -0.02    0.19
   2   0 -13   -0.16    0.14
   2   0 -13    0.32    0.27
   1   0 -13   -0.23    0.24
   1   0 -13    0.06    0.10
   1   0 -13    0.17    0.24
   0   0 -13    0.00    0.21
   0   0 -13    0.03    0.08
   0   0 -13    0.42    0.28
  -1   0 -13    0.14    0.22
  -1   0 -13   -0.03    0.23
  -2   0 -13    0.14    0.23
  -2   0 -13   -0.43    0.32
  -3   0 -13   -0.27    0.27
  -3   0 -13    0.33    0.27
  -4   0 -13    0.33    0.27
  -4   0 -13    0.20    0.27
  -5   0 -13   -0.11    0.26
  -5   0 -13    0.09    0.28
  -6   0 -13   -0.04    0.25
  -6   0 -13    0.01    0.25
  -7   0 -13    0.57    0.37
  -7   0 -13    0.40    0.35
  -8   0 -13   -0.29    0.31
  -8   0 -13    0.64    0.40
  -9   0 -13    0.07    0.29
  -9   0 -13    0.39    0.38
 -10   0 -13   -0.39    0.34
 -10   0 -13    0.58    0.40
 -11   0 -13    0.46    0.34
 -11   0 -13    0.02    0.35
 -12   0 -13   -0.11    0.32
 -13   0 -13    0.39    0.36
  22   1 -13   -0.05    0.31
  22  -1 -13    0.23    0.28
  21   1 -13    0.67    0.30
  21  -1 -13    0.75    0.29
  20   1 -13   -0.32    0.30
  20  -1 -13    0.05    0.27
  19   1 -13   -0.33    0.31
  19  -1 -13    0.33    0.27
  18   1 -13    0.65    0.29
  18  -1 -13    0.85    0.33
  17   1 -13    0.39    0.28
  17  -1 -13    0.31    0.26
  16  -1 -13   -0.33    0.24
  16   1 -13   -0.27    0.28
  15  -1 -13    0.21    0.22
  15   1 -13    0.40    0.25
  14  -1 -13   -0.09    0.24
  13  -1 -13    0.69    0.23
  12  -1 -13    0.22    0.19
  12   1 -13   -0.09    0.18
  11  -1 -13    0.30    0.18
  11   1 -13    0.25    0.19
  11  -1 -13    0.48    0.30
  10  -1 -13   -0.06    0.20
  10   1 -13    0.45    0.22
  10  -1 -13    0.26    0.24
   9   1 -13    1.74    0.32
   9  -1 -13    1.66    0.40
   9   1 -13    1.88    0.29
   9  -1 -13    1.50    0.28
   8   1 -13    3.51    0.42
   8  -1 -13    2.86    0.43
   8   1 -13    4.10    0.38
   7   1 -13    0.53    0.22
   7  -1 -13    0.27    0.26
   7   1 -13    0.60    0.21
   6   1 -13    0.06    0.18
   6  -1 -13   -0.02    0.24
   6   1 -13    0.13    0.16
   5  -1 -13   -0.12    0.27
   5   1 -13   -0.07    0.15
   5   1 -13    0.33    0.23
   4  -1 -13   -0.20    0.27
   4   1 -13   -0.16    0.22
   4   1 -13   -0.14    0.17
   4   1 -13    0.06    0.18
   3  -1 -13   -0.15    0.26
   3   1 -13   -0.02    0.17
   3  -1 -13   -0.17    0.25
   3   1 -13    0.25    0.15
   3   1 -13    0.34    0.25
   2   1 -13    9.62    0.51
   2   1 -13    9.63    0.69
   2  -1 -13    9.16    0.35
   2  -1 -13    9.66    0.79
   2   1 -13    9.53    0.64
   2  -1 -13    8.39    0.71
   1   1 -13    0.21    0.18
   1  -1 -13   -0.18    0.24
   1   1 -13    0.05    0.12
   1  -1 -13   -0.04    0.07
   1   1 -13   -0.12    0.22
   1  -1 -13    0.24    0.29
   0   1 -13    1.55    0.30
   0  -1 -13    1.94    0.42
   0   1 -13    1.43    0.21
   0   1 -13    1.36    0.33
   0  -1 -13    1.49    0.36
  -1   1 -13    1.25    0.29
  -1  -1 -13    1.92    0.41
  -1   1 -13    1.40    0.21
  -1   1 -13    2.05    0.40
  -1  -1 -13    2.17    0.46
  -2   1 -13    0.02    0.18
  -2  -1 -13    0.82    0.34
  -2   1 -13    0.31    0.13
  -2   1 -13    0.17    0.23
  -2  -1 -13    0.15    0.25
  -3   1 -13    1.59    0.33
  -3  -1 -13    1.14    0.33
  -3   1 -13    2.27    0.41
  -3  -1 -13    1.17    0.37
  -4   1 -13   -0.09    0.19
  -4  -1 -13   -0.44    0.32
  -4   1 -13    0.11    0.23
  -4  -1 -13   -0.12    0.28
  -5   1 -13    0.21    0.24
  -5  -1 -13   -0.25    0.28
  -5   1 -13    0.04    0.23
  -5  -1 -13    0.02    0.25
  -6   1 -13    2.08    0.38
  -6  -1 -13    1.93    0.48
  -6   1 -13    2.55    0.51
  -6  -1 -13    3.11    0.52
  -7   1 -13   -0.24    0.26
  -7  -1 -13    0.11    0.28
  -7   1 -13    0.33    0.33
  -7  -1 -13   -0.15    0.28
  -8   1 -13   -0.21    0.24
  -8  -1 -13    0.22    0.28
  -8   1 -13    0.39    0.38
  -8  -1 -13    0.65    0.37
  -9   1 -13    0.07    0.26
  -9  -1 -13    0.74    0.42
  -9   1 -13    0.06    0.27
  -9  -1 -13    0.01    0.33
 -10   1 -13    0.15    0.25
 -10  -1 -13    0.24    0.30
 -10  -1 -13    0.86    0.45
 -11   1 -13    0.35    0.30
 -11  -1 -13   -0.61    0.41
 -11  -1 -13    0.55    0.41
 -12   1 -13    0.89    0.41
 -12  -1 -13    0.81    0.39
 -23  -2  13    0.49    0.35
 -22  -2  13   -0.16    0.31
  21  -2 -13    1.69    0.43
  20  -2 -13    0.06    0.22
  19  -2 -13    2.09    0.44
  18  -2 -13    0.11    0.25
  18   2 -13    0.83    0.37
  17  -2 -13    0.99    0.32
  17   2 -13    2.44    0.44
  16  -2 -13    0.46    0.28
  16   2 -13    1.37    0.38
  15  -2 -13    0.11    0.19
  15   2 -13    1.48    0.38
  14  -2 -13    0.06    0.22
  14   2 -13    0.16    0.18
  13  -2 -13   -0.11    0.22
  13   2 -13   -0.08    0.18
  13   2 -13    0.49    0.27
  12   2 -13    0.97    0.24
  12   2 -13    0.90    0.29
  11   2 -13   -0.10    0.17
  11  -2 -13   -0.32    0.23
  11  -2 -13    0.15    0.25
  11   2 -13    0.51    0.26
  10   2 -13    1.25    0.27
  10  -2 -13    1.35    0.28
  10  -2 -13    1.96    0.46
  10   2 -13    1.28    0.29
   9   2 -13    0.01    0.14
   9  -2 -13   -0.04    0.17
   9  -2 -13   -0.08    0.26
   9   2 -13   -0.06    0.20
   8  -2 -13   -0.10    0.17
   8  -2 -13    0.09    0.23
   8   2 -13   -0.01    0.19
   8   2 -13    0.02    0.18
   7  -2 -13    0.45    0.30
   7   2 -13    0.68    0.22
   7   2 -13    0.71    0.21
   7  -2 -13    0.34    0.19
   6  -2 -13    3.33    0.52
   6   2 -13    4.32    0.42
   6   2 -13    2.73    0.36
   5  -2 -13    3.03    0.54
   5   2 -13    2.76    0.36
   5   2 -13    2.84    0.37
   4  -2 -13   -0.06    0.27
   4   2 -13   -0.04    0.14
   4   2 -13    0.13    0.20
   4   2 -13   -0.09    0.19
   3  -2 -13    0.76    0.32
   3   2 -13    1.07    0.22
   3  -2 -13    1.04    0.36
   3   2 -13    0.86    0.25
   3   2 -13    0.56    0.20
   2  -2 -13    5.65    0.69
   2   2 -13    5.57    0.51
   2   2 -13    5.67    0.48
   2   2 -13    5.73    0.44
   2  -2 -13    6.39    0.68
   1  -2 -13    4.58    0.59
   1   2 -13    4.91    0.49
   1   2 -13    5.57    0.46
   1   2 -13    5.19    0.41
   1  -2 -13    4.17    0.60
   0   2 -13    0.32    0.17
   0  -2 -13    0.77    0.37
   0   2 -13    0.29    0.16
   0   2 -13    0.55    0.24
   0  -2 -13    0.35    0.31
  -1  -2 -13    3.28    0.52
  -1   2 -13    3.59    0.38
  -1   2 -13    3.76    0.46
  -1   2 -13    3.93    0.39
  -1  -2 -13    4.68    0.66
  -2   2 -13    1.58    0.26
  -2  -2 -13    1.41    0.40
  -2   2 -13    1.50    0.24
  -2   2 -13    1.76    0.35
  -2  -2 -13    1.45    0.42
  -3   2 -13    0.52    0.21
  -3  -2 -13    0.73    0.31
  -3   2 -13    0.67    0.21
  -3   2 -13    0.30    0.24
  -3  -2 -13    1.06    0.36
  -4   2 -13    1.84    0.30
  -4  -2 -13    2.34    0.50
  -4   2 -13    1.83    0.38
  -4  -2 -13    2.28    0.50
  -5   2 -13    2.64    0.35
  -5  -2 -13    3.09    0.54
  -5   2 -13    2.88    0.50
  -5  -2 -13    3.14    0.58
  -6  -2 -13    0.33    0.28
  -6  -2 -13   -0.10    0.36
  -7  -2 -13    1.14    0.40
  -7  -2 -13    1.06    0.44
  -8  -2 -13    3.95    0.63
  -8  -2 -13    5.03    0.75
  -9  -2 -13    0.82    0.44
  -9  -2 -13    1.89    0.56
 -10  -2 -13   -0.08    0.30
 -10  -2 -13    0.87    0.42
  20  -3 -13    0.74    0.37
  19  -3 -13    0.50    0.31
  19   3 -13    1.83    0.48
  18  -3 -13    0.39    0.28
  18   3 -13    0.53    0.32
  17  -3 -13    0.45    0.34
  17   3 -13    0.81    0.39
  16  -3 -13    7.20    0.67
  16   3 -13    7.14    0.71
  15  -3 -13    3.29    0.47
  15   3 -13    4.51    0.59
  14  -3 -13    1.31    0.33
  14   3 -13    1.24    0.35
  13  -3 -13    0.48    0.26
  13   3 -13    0.03    0.25
  12  -3 -13    0.52    0.24
  12  -3 -13    0.48    0.34
  12   3 -13    0.47    0.31
  11  -3 -13    2.51    0.37
  11  -3 -13    2.48    0.49
  11   3 -13    2.17    0.40
  10  -3 -13    1.99    0.33
  10  -3 -13    1.97    0.45
  10   3 -13    1.05    0.30
   9  -3 -13    9.41    0.62
   9   3 -13    9.01    0.71
   9  -3 -13    9.08    0.86
   8  -3 -13   -0.12    0.30
   8   3 -13   -0.49    0.29
   7  -3 -13    1.42    0.28
   7  -3 -13    1.56    0.40
   7   3 -13    1.52    0.35
   6  -3 -13    2.45    0.49
   6   3 -13    2.55    0.42
   6  -3 -13    2.52    0.34
   5  -3 -13    0.84    0.35
   5   3 -13    1.30    0.32
   5   3 -13    1.37    0.22
   4  -3 -13    1.01    0.37
   4  -3 -13    1.97    0.47
   4   3 -13    2.27    0.39
   4   3 -13    2.14    0.27
   3  -3 -13    0.45    0.29
   3  -3 -13    0.54    0.33
   3   3 -13    0.73    0.26
   3   3 -13    0.66    0.18
   2  -3 -13    2.53    0.54
   2  -3 -13    1.53    0.42
   2   3 -13    2.30    0.36
   2   3 -13    1.84    0.29
   1  -3 -13    3.66    0.55
   1   3 -13    3.81    0.41
   1   3 -13    4.45    0.48
   1  -3 -13    3.68    0.60
   0  -3 -13    0.04    0.33
   0   3 -13    0.20    0.20
   0   3 -13    0.53    0.22
   0  -3 -13    0.16    0.27
  -1  -3 -13    2.58    0.52
  -1   3 -13    1.89    0.32
  -1  -3 -13    2.67    0.53
  -2  -3 -13   -0.27    0.33
  -2   3 -13    0.02    0.19
  -2  -3 -13    0.36    0.36
  -3  -3 -13   -0.38    0.40
  -3   3 -13    0.08    0.20
  -3  -3 -13    0.44    0.35
  -4  -3 -13    0.04    0.33
  -4   3 -13    0.25    0.21
  -4  -3 -13    0.29    0.36
  -5  -3 -13    0.10    0.32
  -5  -3 -13    0.31    0.37
  -6  -3 -13    0.21    0.34
  -6  -3 -13    0.18    0.36
  -7  -3 -13    0.18    0.31
  -7  -3 -13   -0.27    0.40
  -8  -3 -13    0.55    0.42
  -8  -3 -13    0.11    0.37
  18  -4 -13    0.37    0.31
  17  -4 -13    0.34    0.30
  17   4 -13   -0.27    0.36
  16  -4 -13    0.00    0.22
  16   4 -13    0.15    0.30
  15  -4 -13    0.12    0.23
  15   4 -13   -0.79    0.41
  14  -4 -13    0.10    0.23
  14   4 -13   -0.72    0.46
  13  -4 -13   -0.25    0.36
  13  -4 -13   -0.09    0.22
  13   4 -13   -0.58    0.42
  12  -4 -13    0.41    0.30
  12  -4 -13    0.07    0.20
  11  -4 -13    0.08    0.37
  11  -4 -13    0.08    0.19
  11   4 -13    0.55    0.31
  10  -4 -13    1.18    0.42
  10  -4 -13    0.86    0.25
  10   4 -13    1.35    0.38
   9  -4 -13   -0.22    0.31
   9  -4 -13   -0.01    0.19
   9   4 -13    0.53    0.32
   8  -4 -13   -0.17    0.20
   8  -4 -13    0.16    0.28
   8   4 -13    0.46    0.32
   7  -4 -13   -0.22    0.20
   7  -4 -13   -0.12    0.27
   7   4 -13   -0.24    0.29
   6  -4 -13    2.78    0.34
   6  -4 -13    2.96    0.56
   6   4 -13    2.76    0.48
   5  -4 -13    0.59    0.33
   5  -4 -13    0.51    0.35
   5   4 -13    0.76    0.31
   5  -4 -13    0.37    0.17
   4  -4 -13    1.67    0.47
   4  -4 -13    2.35    0.53
   4   4 -13    1.67    0.41
   3  -4 -13    1.95    0.52
   3  -4 -13    1.72    0.45
   3   4 -13    1.63    0.37
   2  -4 -13    1.93    0.52
   2  -4 -13    2.03    0.50
   2   4 -13    1.75    0.37
   1  -4 -13    0.63    0.33
   1   4 -13    0.17    0.25
   1  -4 -13    0.28    0.32
   0  -4 -13    1.59    0.46
   0   4 -13    1.68    0.37
   0  -4 -13    1.84    0.50
  -1  -4 -13    5.96    0.77
  -1   4 -13    5.99    0.64
  -1  -4 -13    5.74    0.76
  -2  -4 -13    4.46    0.70
  -2   4 -13    4.03    0.51
  -2  -4 -13    4.75    0.74
  -3  -4 -13    2.99    0.60
  -3   4 -13    2.51    0.45
  -3  -4 -13    3.70    0.67
  -4  -4 -13    0.53    0.39
  -4   4 -13    1.57    0.37
  -4  -4 -13    0.53    0.37
  -5  -4 -13    1.82    0.53
  -5  -4 -13    2.88    0.62
  -6  -4 -13    3.85    0.67
  -6  -4 -13    3.94    0.69
  16  -5 -13    0.91    0.37
  15  -5 -13    0.61    0.31
  14  -5 -13    0.69    0.29
  13  -5 -13    1.37    0.50
  13  -5 -13    1.24    0.34
  13   5 -13    1.39    0.48
  12  -5 -13    0.32    0.40
  12  -5 -13    0.87    0.30
  12   5 -13    1.31    0.46
  11  -5 -13    2.68    0.61
  11  -5 -13    2.52    0.40
  11   5 -13    1.36    0.45
  10  -5 -13    0.04    0.37
  10  -5 -13    0.53    0.25
  10   5 -13   -0.09    0.35
   9  -5 -13    0.12    0.30
   9   5 -13    0.19    0.35
   8  -5 -13    3.50    0.67
   8   5 -13    2.91    0.57
   7  -5 -13    2.06    0.54
   7  -5 -13    2.08    0.55
   7   5 -13    1.93    0.45
   6  -5 -13    0.37    0.32
   6  -5 -13   -0.36    0.37
   6   5 -13   -0.12    0.28
   5  -5 -13    0.62    0.35
   5  -5 -13    0.53    0.42
   5   5 -13   -0.35    0.38
   4  -5 -13    3.54    0.65
   4  -5 -13    4.53    0.76
   4   5 -13    4.16    0.59
   3  -5 -13    1.20    0.47
   3  -5 -13    1.32    0.46
   3   5 -13    1.03    0.37
   2  -5 -13    0.91    0.40
   2   5 -13    1.10    0.38
   2  -5 -13    0.70    0.40
   1  -5 -13    0.01    0.37
   1   5 -13    0.28    0.28
   1  -5 -13    0.09    0.35
   0  -5 -13    0.98    0.44
   0   5 -13    0.39    0.33
   0  -5 -13    0.03    0.34
  -1  -5 -13   -0.54    0.44
  -1   5 -13    0.32    0.34
  -1  -5 -13    0.61    0.45
  -2  -5 -13   -0.22    0.44
  -2   5 -13    0.69    0.36
  -2  -5 -13    0.11    0.34
  -3   5 -13    0.72    0.35
  -3  -5 -13    1.17    0.51
  -4   5 -13    0.16    0.29
  21   0 -14    0.90    0.34
  20   0 -14   -0.10    0.32
  19   0 -14    0.32    0.29
  18   0 -14    4.07    0.55
  17   0 -14    2.75    0.45
  16   0 -14   -0.13    0.28
  15   0 -14    0.10    0.24
  14   0 -14    1.09    0.32
  13   0 -14    5.67    0.56
  13   0 -14    6.00    0.68
  12   0 -14    0.51    0.30
  11   0 -14    1.49    0.33
  10   0 -14    4.79    0.57
   9   0 -14    9.36    0.75
   8   0 -14   48.08    1.69
   7   0 -14   26.22    1.24
   6   0 -14    2.18    0.40
   6   0 -14    2.97    0.30
   5   0 -14    1.94    0.39
   5   0 -14    3.27    0.32
   4   0 -14   59.98    1.17
   4   0 -14   60.33    1.87
   4   0 -14   63.69    1.82
   3   0 -14   13.18    0.54
   3   0 -14   12.69    0.88
   3   0 -14   13.81    0.87
   2   0 -14    7.36    0.39
   2   0 -14    7.03    0.67
   2   0 -14    6.53    0.64
   1   0 -14   21.11    0.62
   1   0 -14   22.61    1.19
   1   0 -14   22.92    1.13
   0   0 -14   20.77    1.16
   0   0 -14   18.18    1.04
  -1   0 -14    2.60    0.44
  -1   0 -14    2.91    0.48
  -2   0 -14    6.12    0.67
  -2   0 -14    6.45    0.65
  -3   0 -14   18.48    1.15
  -3   0 -14   19.16    1.10
  -4   0 -14   30.08    1.48
  -4   0 -14   30.27    1.40
  -5   0 -14    2.06    0.43
  -5   0 -14    1.74    0.44
  -6   0 -14   14.40    1.09
  -6   0 -14   13.87    0.99
  -7   0 -14    1.77    0.43
  -7   0 -14    2.41    0.54
  -8   0 -14    3.00    0.52
  -8   0 -14    4.04    0.64
  -9   0 -14    0.31    0.31
  -9   0 -14    0.39    0.38
 -10   0 -14    0.08    0.31
 -10   0 -14    0.19    0.33
 -11   0 -14    1.13    0.42
 -12   0 -14   -0.08    0.37
  21   1 -14    2.80    0.51
  21  -1 -14    3.08    0.53
  20   1 -14   -0.09    0.24
  20  -1 -14   -0.15    0.31
  19  -1 -14   -0.34    0.29
  19   1 -14   -0.30    0.27
  18  -1 -14    3.11    0.50
  18   1 -14    2.23    0.43
  17  -1 -14    6.22    0.65
  17   1 -14    5.42    0.60
  16  -1 -14    0.96    0.31
  15  -1 -14    3.35    0.48
  14  -1 -14    7.73    0.67
  14   1 -14    7.75    0.71
  13  -1 -14    4.23    0.49
  13   1 -14    4.35    0.52
  13  -1 -14    4.74    0.63
  12  -1 -14    2.55    0.39
  12   1 -14    3.57    0.46
  12  -1 -14    3.10    0.50
  11  -1 -14    5.85    0.55
  11   1 -14    5.88    0.57
  11  -1 -14    6.43    0.69
  10  -1 -14    7.99    0.61
  10   1 -14    8.91    0.59
  10   1 -14    8.38    0.66
  10  -1 -14    7.78    0.76
   9   1 -14    9.98    0.60
   9   1 -14    8.26    0.67
   9  -1 -14    8.53    0.78
   8   1 -14    2.65    0.39
   8  -1 -14    2.61    0.48
   8   1 -14    3.58    0.38
   7   1 -14    7.36    0.51
   7   1 -14    5.59    0.55
   7  -1 -14    6.46    0.70
   6   1 -14    7.50    0.51
   6   1 -14    7.57    0.63
   6  -1 -14    7.32    0.75
   5  -1 -14    2.36    0.44
   5   1 -14    1.54    0.23
   5   1 -14    1.61    0.36
   4  -1 -14    0.50    0.30
   4   1 -14    0.74    0.24
   4  -1 -14    0.60    0.29
   4   1 -14    0.31    0.18
   4   1 -14    0.93    0.28
   3   1 -14    0.19    0.21
   3  -1 -14    0.11    0.21
   3   1 -14    0.29    0.16
   3  -1 -14    0.43    0.12
   3   1 -14    0.04    0.21
   3  -1 -14    0.19    0.23
   2   1 -14    3.93    0.45
   2  -1 -14    3.45    0.50
   2   1 -14    4.18    0.37
   2   1 -14    3.09    0.45
   2  -1 -14    3.97    0.55
   1   1 -14    0.96    0.26
   1  -1 -14    1.25    0.39
   1   1 -14    1.17    0.22
   1   1 -14    1.17    0.31
   1  -1 -14    0.87    0.38
   0   1 -14    8.78    0.47
   0   1 -14    9.49    0.75
   0  -1 -14    9.12    0.83
   0   1 -14   10.15    0.71
   0  -1 -14    9.80    0.82
  -1  -1 -14    5.98    0.67
  -1   1 -14    5.47    0.61
  -1  -1 -14    5.48    0.69
  -1   1 -14    6.17    0.57
  -2   1 -14    4.23    0.50
  -2  -1 -14    3.83    0.55
  -2   1 -14    3.88    0.53
  -2  -1 -14    3.49    0.56
  -3   1 -14    4.10    0.49
  -3  -1 -14    4.58    0.62
  -3   1 -14    5.15    0.61
  -3  -1 -14    3.78    0.56
  -4   1 -14    1.95    0.39
  -4  -1 -14    0.79    0.32
  -4   1 -14    1.42    0.41
  -4  -1 -14    1.36    0.41
  -5   1 -14    2.26    0.43
  -5  -1 -14    2.37    0.51
  -5   1 -14    2.91    0.52
  -5  -1 -14    3.23    0.58
  -6  -1 -14    6.94    0.79
  -6   1 -14    8.17    0.81
  -6  -1 -14    8.31    0.87
  -6   1 -14    6.98    0.67
  -7   1 -14    3.79    0.53
  -7  -1 -14    4.19    0.64
  -7   1 -14    3.79    0.62
  -7  -1 -14    3.38    0.61
  -8   1 -14    2.56    0.46
  -8  -1 -14    3.28    0.60
  -8   1 -14    2.58    0.52
  -8  -1 -14    4.33    0.71
  -9   1 -14    5.15    0.63
  -9  -1 -14    6.18    0.79
  -9   1 -14    5.95    0.77
  -9  -1 -14    5.28    0.77
 -10   1 -14    2.94    0.50
 -10  -1 -14    2.59    0.57
 -11  -1 -14    0.24    0.35
  20  -2 -14    0.32    0.27
  20   2 -14    1.23    0.41
  19  -2 -14    0.64    0.33
  19   2 -14    1.09    0.37
  18  -2 -14    0.08    0.22
  18   2 -14    0.73    0.35
  17  -2 -14    0.20    0.30
  17   2 -14    0.70    0.34
  16  -2 -14    2.42    0.41
  16   2 -14    2.74    0.45
  15  -2 -14    1.37    0.35
  15   2 -14    1.59    0.34
  15   2 -14    1.60    0.37
  14  -2 -14    0.16    0.21
  14   2 -14    0.01    0.20
  13  -2 -14   -0.13    0.24
  13   2 -14   -0.01    0.18
  13  -2 -14   -0.22    0.36
  13   2 -14    0.62    0.30
  12  -2 -14    1.82    0.34
  12   2 -14    1.62    0.30
  12  -2 -14    1.29    0.40
  12   2 -14    1.95    0.37
  11  -2 -14   12.40    0.76
  11   2 -14   10.66    0.72
  11   2 -14   11.32    0.70
  11  -2 -14   10.35    0.92
  10   2 -14    3.92    0.41
  10  -2 -14    4.19    0.46
  10  -2 -14    3.78    0.60
  10   2 -14    4.19    0.48
   9  -2 -14    6.31    0.74
   9  -2 -14    6.06    0.53
   9   2 -14    6.01    0.54
   9   2 -14    6.25    0.51
   8  -2 -14   19.49    0.89
   8   2 -14   19.12    0.92
   8   2 -14   19.49    0.90
   8  -2 -14   18.15    1.17
   7  -2 -14    0.03    0.28
   7   2 -14    0.02    0.25
   7   2 -14    0.32    0.19
   6  -2 -14    6.41    0.73
   6   2 -14    5.60    0.50
   6   2 -14    5.06    0.47
   5   2 -14   11.40    0.71
   5   2 -14   12.17    0.71
   5  -2 -14   11.85    0.96
   5   2 -14   12.59    0.68
   4   2 -14   19.42    0.94
   4   2 -14   18.77    0.87
   4  -2 -14   17.80    1.17
   4   2 -14   16.70    0.78
   4  -2 -14   17.00    1.09
   3   2 -14   12.46    0.76
   3   2 -14   11.57    0.69
   3  -2 -14   10.70    0.92
   3   2 -14   10.83    0.63
   3  -2 -14   11.42    0.91
   2   2 -14    7.41    0.62
   2   2 -14    8.24    0.59
   2  -2 -14    7.77    0.81
   2   2 -14    7.75    0.54
   2  -2 -14    8.37    0.80
   1   2 -14   14.07    0.84
   1   2 -14   12.31    0.68
   1  -2 -14   12.25    1.01
   1   2 -14   13.15    0.71
   1  -2 -14   10.56    0.90
   0  -2 -14    6.48    0.74
   0   2 -14    5.89    0.57
   0   2 -14    5.44    0.46
   0  -2 -14    7.42    0.82
   0   2 -14    6.02    0.49
  -1   2 -14   11.72    0.79
  -1   2 -14   10.79    0.61
  -1  -2 -14   11.16    0.98
  -1   2 -14   11.37    0.67
  -1  -2 -14   10.37    0.93
  -2   2 -14   23.91    1.16
  -2  -2 -14   21.98    1.36
  -2   2 -14   23.05    0.95
  -2  -2 -14   21.80    1.32
  -3   2 -14    9.73    0.79
  -3  -2 -14    9.39    0.93
  -3  -2 -14    9.79    0.91
  -4  -2 -14    5.43    0.72
  -4   2 -14    5.41    0.61
  -4  -2 -14    4.47    0.68
  -5  -2 -14    1.60    0.47
  -5   2 -14    2.31    0.50
  -5  -2 -14    2.08    0.52
  -6  -2 -14    1.03    0.45
  -6  -2 -14    1.36    0.47
  -7  -2 -14    1.62    0.46
  -7  -2 -14    1.61    0.54
  -8  -2 -14    1.97    0.51
  -8  -2 -14    2.40    0.57
  -9  -2 -14    0.83    0.47
  19  -3 -14    1.35    0.39
  18  -3 -14    1.85    0.42
  18   3 -14    1.09    0.39
  17  -3 -14    1.64    0.41
  17   3 -14    1.41    0.41
  16  -3 -14    2.83    0.45
  16   3 -14    3.45    0.52
  15  -3 -14    3.03    0.45
  15   3 -14    3.25    0.53
  14  -3 -14    2.15    0.40
  14   3 -14    1.77    0.38
  13  -3 -14    2.03    0.38
  13  -3 -14    2.52    0.56
  13   3 -14    2.47    0.44
  12  -3 -14    1.57    0.33
  12  -3 -14    1.36    0.42
  12   3 -14    1.19    0.32
  11  -3 -14    0.05    0.20
  11  -3 -14   -0.02    0.33
  11   3 -14   -0.17    0.29
  10  -3 -14   -0.11    0.20
  10  -3 -14    0.28    0.31
  10   3 -14   -0.15    0.27
   9  -3 -14    2.47    0.37
   9  -3 -14    2.95    0.56
   9   3 -14    2.89    0.41
   8  -3 -14    2.98    0.39
   8  -3 -14    3.46    0.60
   8   3 -14    3.55    0.50
   7  -3 -14    1.12    0.43
   7   3 -14    1.21    0.34
   7  -3 -14    0.74    0.22
   6  -3 -14   -0.21    0.37
   6   3 -14    0.60    0.31
   5  -3 -14    2.23    0.49
   5  -3 -14    1.02    0.35
   5   3 -14    2.36    0.39
   4  -3 -14   -0.18    0.30
   4  -3 -14   -0.04    0.33
   4   3 -14    0.08    0.22
   3  -3 -14    0.29    0.34
   3  -3 -14   -0.08    0.31
   3   3 -14    0.21    0.25
   2  -3 -14   -0.10    0.35
   2   3 -14    0.17    0.21
   2   3 -14    0.03    0.15
   2  -3 -14    0.15    0.34
   1  -3 -14    0.40    0.35
   1   3 -14    0.11    0.20
   1   3 -14    0.11    0.18
   1  -3 -14   -0.27    0.38
   0  -3 -14    0.51    0.30
   0   3 -14    0.39    0.25
   0   3 -14    0.42    0.24
   0  -3 -14    0.20    0.26
  -1  -3 -14    0.83    0.41
  -1   3 -14    1.47    0.32
  -1  -3 -14    1.45    0.46
  -2  -3 -14    4.47    0.69
  -2   3 -14    3.50    0.43
  -2  -3 -14    3.41    0.62
  -3  -3 -14    2.20    0.53
  -3  -3 -14    3.83    0.68
  -4  -3 -14    4.18    0.70
  -4  -3 -14    3.21    0.62
  -5  -3 -14    1.88    0.51
  -5  -3 -14    2.19    0.58
  -6  -3 -14    0.55    0.40
  -6  -3 -14    1.57    0.53
  -7  -3 -14    1.58    0.51
  -7  -3 -14    2.34    0.65
  17  -4 -14   -0.03    0.24
  16  -4 -14    0.50    0.33
  16   4 -14   -0.56    0.38
  15  -4 -14    0.10    0.25
  15   4 -14   -1.03    0.46
  14  -4 -14    0.46    0.39
  14  -4 -14    0.55    0.29
  14   4 -14   -0.39    0.38
  13  -4 -14    0.39    0.37
  13  -4 -14    0.62    0.27
  12  -4 -14    0.89    0.31
  12  -4 -14    0.91    0.38
  12   4 -14    1.59    0.46
  11  -4 -14    0.28    0.23
  11  -4 -14    0.37    0.40
  11   4 -14    0.35    0.29
  10  -4 -14    1.18    0.30
  10  -4 -14    1.23    0.41
  10   4 -14    0.80    0.34
   9  -4 -14    0.97    0.28
   9  -4 -14    1.81    0.50
   9   4 -14    1.73    0.44
   8  -4 -14    1.18    0.28
   8  -4 -14    0.63    0.36
   8   4 -14    1.14    0.39
   7  -4 -14    5.37    0.76
   7  -4 -14    5.53    0.49
   7   4 -14    5.27    0.64
   6  -4 -14    6.55    0.82
   6  -4 -14    5.90    0.79
   6   4 -14    6.02    0.66
   5  -4 -14    6.58    0.84
   5  -4 -14    6.49    0.81
   5   4 -14    6.01    0.66
   4  -4 -14    3.63    0.66
   4  -4 -14    3.68    0.66
   4   4 -14    3.60    0.53
   3  -4 -14    0.86    0.42
   3  -4 -14    0.75    0.44
   3   4 -14    0.87    0.32
   2  -4 -14    5.10    0.74
   2   4 -14    3.97    0.53
   2  -4 -14    4.31    0.70
   1  -4 -14    5.13    0.77
   1   4 -14    4.46    0.55
   1  -4 -14    5.68    0.80
   0  -4 -14    2.75    0.61
   0   4 -14    2.99    0.48
   0  -4 -14    3.02    0.63
  -1  -4 -14    0.74    0.46
  -1   4 -14    0.95    0.33
  -1  -4 -14    1.61    0.50
  -2  -4 -14    1.79    0.58
  -2   4 -14    1.22    0.34
  -2  -4 -14    1.12    0.50
  -3  -4 -14    2.32    0.59
  -3  -4 -14    2.93    0.62
  -4  -4 -14    2.76    0.64
  -4  -4 -14    2.82    0.63
  16  -5 -14    0.25    0.31
  15  -5 -14    1.42    0.41
  14  -5 -14    0.91    0.33
  13  -5 -14    0.52    0.26
  12  -5 -14    0.04    0.22
  11  -5 -14   -0.12    0.34
  11   5 -14   -0.09    0.38
  10  -5 -14    0.14    0.42
  10   5 -14    0.08    0.35
   9  -5 -14    2.19    0.59
   9   5 -14    1.88    0.47
   8  -5 -14    0.40    0.40
   8   5 -14    0.00    0.35
   7  -5 -14   -0.34    0.39
   7  -5 -14    0.30    0.38
   7   5 -14   -0.21    0.36
   6  -5 -14    0.41    0.39
   6  -5 -14   -0.30    0.39
   6   5 -14    0.12    0.33
   5  -5 -14    0.06    0.33
   5  -5 -14    0.15    0.40
   5   5 -14   -0.22    0.34
   4  -5 -14   -0.43    0.41
   4  -5 -14    0.08    0.38
   4   5 -14   -0.36    0.35
   3  -5 -14    1.14    0.45
   3  -5 -14    1.23    0.56
   3   5 -14    1.17    0.39
   2  -5 -14    0.98    0.52
   2   5 -14   -0.12    0.31
   2  -5 -14    0.38    0.43
   1  -5 -14   -0.25    0.40
   1   5 -14   -0.10    0.30
   1  -5 -14    0.09    0.39
   0   5 -14    0.31    0.32
   0  -5 -14    0.51    0.45
  -1   5 -14   -0.02    0.31
  -2   5 -14    0.52    0.36
  -3   5 -14    0.59    0.33
  20   0 -15   -0.38    0.35
  19   0 -15    0.00    0.26
  18   0 -15    0.45    0.29
  17   0 -15   -0.37    0.31
  16   0 -15    0.12    0.27
  15   0 -15    1.23    0.40
  15   0 -15    0.90    0.30
  14   0 -15    0.02    0.26
  13   0 -15    0.05    0.28
  12   0 -15   -0.16    0.23
  11   0 -15    0.22    0.27
  10   0 -15    0.03    0.25
   9   0 -15    0.29    0.29
   8   0 -15    0.11    0.21
   7   0 -15   -0.02    0.25
   7   0 -15    0.60    0.20
   6   0 -15    0.01    0.22
   6   0 -15    0.15    0.15
   5   0 -15    0.05    0.22
   5   0 -15    0.27    0.16
   5   0 -15   -0.07    0.24
   4   0 -15   -0.03    0.22
   4   0 -15   -0.29    0.17
   4   0 -15    0.40    0.32
   3   0 -15   -0.20    0.25
   3   0 -15   -0.44    0.17
   3   0 -15   -0.22    0.24
   2   0 -15    0.21    0.26
   2   0 -15    0.21    0.29
   1   0 -15    0.05    0.27
   1   0 -15    0.13    0.29
   0   0 -15    0.19    0.24
   0   0 -15   -0.28    0.30
  -1   0 -15   -0.38    0.33
  -1   0 -15    0.08    0.29
  -2   0 -15   -0.10    0.28
  -2   0 -15    0.37    0.32
  -3   0 -15   -0.19    0.29
  -3   0 -15    0.34    0.29
  -4   0 -15    0.22    0.27
  -4   0 -15   -0.24    0.34
  -5   0 -15    0.09    0.29
  -5   0 -15    0.45    0.37
  -6   0 -15   -0.23    0.29
  -6   0 -15   -0.07    0.32
  -7   0 -15    0.42    0.34
  -7   0 -15   -0.16    0.30
  -8   0 -15    0.04    0.29
  -8   0 -15    0.57    0.42
  -9   0 -15   -0.39    0.40
 -10   0 -15   -0.19    0.33
 -11   0 -15   -0.57    0.41
  20  -1 -15   -0.38    0.35
  20   1 -15   -0.11    0.31
  19  -1 -15    0.37    0.28
  18  -1 -15    0.30    0.27
  17  -1 -15    0.02    0.27
  16  -1 -15    0.50    0.28
  16   1 -15    0.65    0.31
  15  -1 -15    0.23    0.27
  15   1 -15    0.23    0.22
  14  -1 -15    1.45    0.36
  14   1 -15    1.58    0.38
  14  -1 -15    1.78    0.44
  13  -1 -15    1.57    0.35
  13   1 -15    1.27    0.34
  13  -1 -15    0.91    0.38
  12   1 -15    0.06    0.20
  12  -1 -15    0.08    0.29
  12   1 -15    0.83    0.28
  12  -1 -15    0.17    0.24
  11   1 -15    0.26    0.24
  11  -1 -15    0.12    0.29
  11   1 -15    0.90    0.28
  10   1 -15    0.16    0.21
  10  -1 -15    0.08    0.23
  10   1 -15    0.10    0.20
   9  -1 -15    0.71    0.33
   9   1 -15    1.03    0.27
   8   1 -15    1.49    0.34
   8  -1 -15    0.89    0.36
   8   1 -15    1.40    0.28
   7  -1 -15    0.55    0.31
   7   1 -15    0.50    0.21
   7   1 -15    0.38    0.22
   6  -1 -15    3.19    0.56
   6   1 -15    2.79    0.34
   6   1 -15    2.60    0.41
   5  -1 -15    0.35    0.30
   5   1 -15   -0.06    0.20
   5   1 -15    0.00    0.20
   5   1 -15    0.24    0.26
   4   1 -15    1.06    0.30
   4  -1 -15    0.93    0.30
   4   1 -15    0.89    0.23
   4  -1 -15    0.87    0.17
   4   1 -15    0.76    0.31
   4  -1 -15    0.67    0.31
   3   1 -15    0.00    0.21
   3  -1 -15   -0.31    0.25
   3   1 -15    0.26    0.19
   3   1 -15    0.05    0.26
   3  -1 -15   -0.11    0.28
   2   1 -15    0.59    0.28
   2  -1 -15    0.43    0.32
   2   1 -15    0.47    0.19
   2   1 -15    0.06    0.24
   2  -1 -15    0.76    0.36
   1   1 -15   -0.20    0.24
   1  -1 -15    0.55    0.34
   1   1 -15   -0.25    0.23
   1  -1 -15    0.35    0.31
   0   1 -15   -0.12    0.22
   0  -1 -15   -0.10    0.29
   0   1 -15   -0.38    0.31
  -1   1 -15   -0.02    0.21
  -1  -1 -15   -0.04    0.27
  -1   1 -15    0.41    0.31
  -1  -1 -15   -0.31    0.35
  -2   1 -15    0.55    0.26
  -2   1 -15    0.88    0.39
  -2  -1 -15    0.76    0.36
  -3   1 -15    1.48    0.36
  -3  -1 -15    1.70    0.46
  -3   1 -15    3.04    0.56
  -3  -1 -15    2.02    0.47
  -4   1 -15    4.51    0.55
  -4  -1 -15    3.92    0.63
  -4   1 -15    4.32    0.60
  -4  -1 -15    4.16    0.64
  -5   1 -15    0.34    0.27
  -5  -1 -15    0.20    0.29
  -5   1 -15    0.07    0.26
  -5  -1 -15    0.70    0.38
  -6   1 -15    0.00    0.25
  -6  -1 -15    0.09    0.32
  -6   1 -15    0.57    0.37
  -6  -1 -15    0.55    0.38
  -7   1 -15   -0.15    0.29
  -7  -1 -15    0.16    0.34
  -7   1 -15    0.05    0.33
  -7  -1 -15    0.33    0.40
  -8  -1 -15    0.92    0.43
  -8   1 -15    0.73    0.39
  -8  -1 -15    1.05    0.48
  -9  -1 -15    0.06    0.40
  -9   1 -15    0.98    0.46
  19  -2 -15    0.19    0.31
  19   2 -15    0.89    0.39
  18  -2 -15    0.08    0.28
  18   2 -15    0.77    0.35
  17  -2 -15   -0.46    0.32
  17   2 -15    1.17    0.39
  16  -2 -15   -0.25    0.28
  16   2 -15    1.56    0.40
  15  -2 -15   -0.17    0.26
  15   2 -15    0.16    0.26
  14  -2 -15   -0.22    0.24
  14  -2 -15    0.09    0.32
  14   2 -15    0.40    0.29
  13  -2 -15    0.82    0.30
  13   2 -15    0.47    0.24
  13  -2 -15    0.79    0.40
  13   2 -15    1.42    0.36
  12  -2 -15    0.57    0.28
  12   2 -15    1.39    0.29
  12  -2 -15    0.98    0.42
  12   2 -15    1.55    0.34
  11  -2 -15    0.03    0.23
  11   2 -15    0.08    0.19
  11  -2 -15   -0.22    0.38
  11   2 -15    0.48    0.27
  10   2 -15    1.60    0.31
  10  -2 -15    1.59    0.44
  10   2 -15    1.44    0.31
  10  -2 -15    0.73    0.27
   9   2 -15    7.86    0.63
   9   2 -15    8.01    0.60
   9  -2 -15    7.35    0.79
   8  -2 -15    1.61    0.42
   8   2 -15    0.59    0.22
   8   2 -15    1.51    0.31
   7  -2 -15   -0.20    0.29
   7   2 -15   -0.34    0.27
   7   2 -15   -0.01    0.17
   6  -2 -15    0.66    0.36
   6   2 -15    1.01    0.26
   6   2 -15    1.34    0.32
   6   2 -15    0.81    0.26
   5  -2 -15    4.51    0.65
   5   2 -15    3.83    0.42
   5  -2 -15    3.50    0.56
   5   2 -15    4.19    0.45
   5   2 -15    3.96    0.47
   4  -2 -15    1.37    0.41
   4   2 -15    1.86    0.30
   4  -2 -15    2.13    0.47
   4   2 -15    2.05    0.32
   4   2 -15    2.01    0.36
   3   2 -15    0.67    0.23
   3  -2 -15    0.07    0.29
   3   2 -15    0.63    0.22
   3   2 -15    0.88    0.30
   3  -2 -15    0.41    0.27
   2   2 -15    0.29    0.18
   2  -2 -15    0.78    0.35
[truncated: 31,265 more chars]
